# Supplementary material for: Synthesis of new asparagine-based glycopeptides for future scanning tunneling microscopy investigations
Source: PubMed Central journal article supplement (PMC7214877; doi:10.3762/bjoc.16.80), 2020-04-30

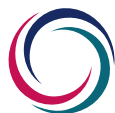

## Supporting Information

for

### Synthesis of new asparagine-based glycopeptides for future scanning tunneling microscopy investigations

Laura Sršan and Thomas Ziegler

*Beilstein J. Org. Chem.* **2020**, *16*, 888–894. [doi:10.3762/bjoc.16.80](https://doi.org/10.3762/bjoc.16.80)

### NMR spectra of the compounds 1a–f to 11a–f

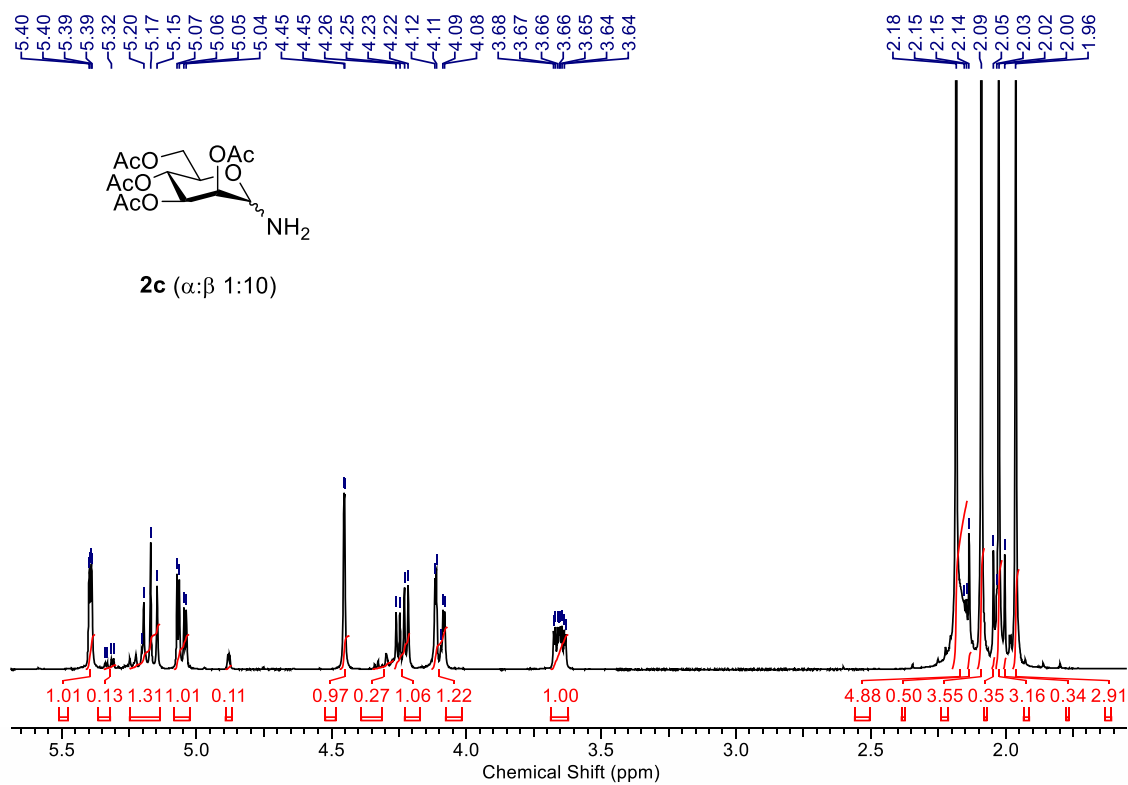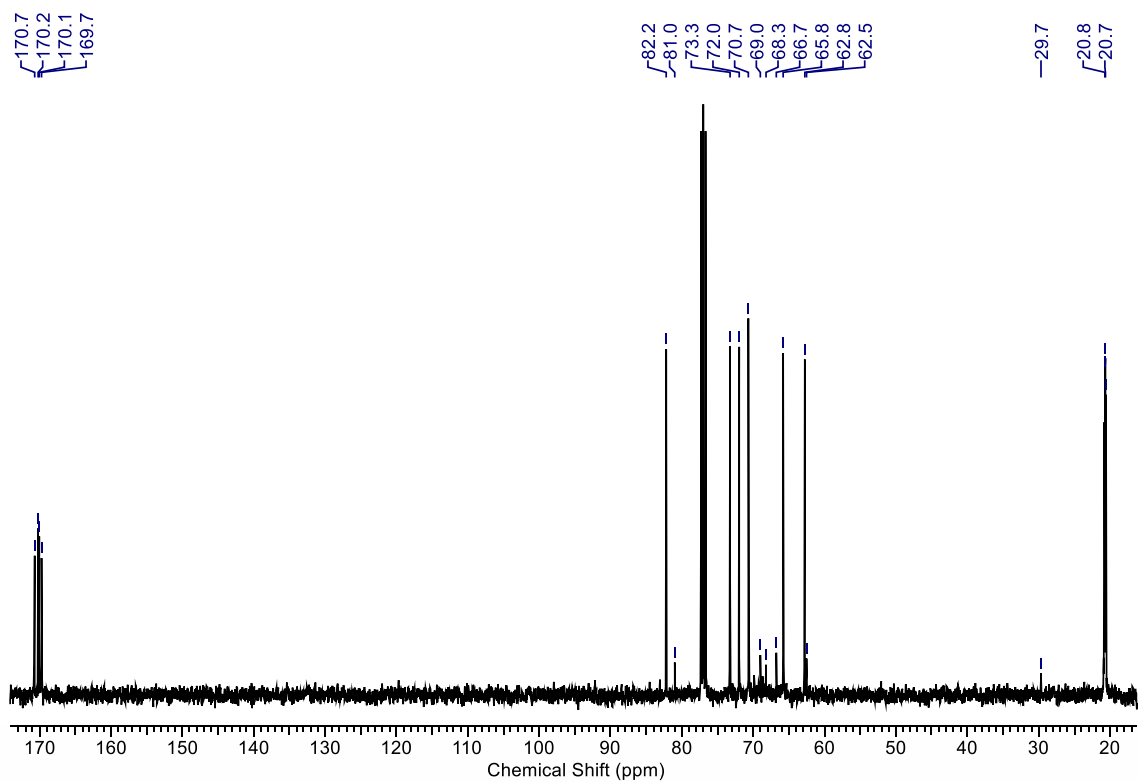

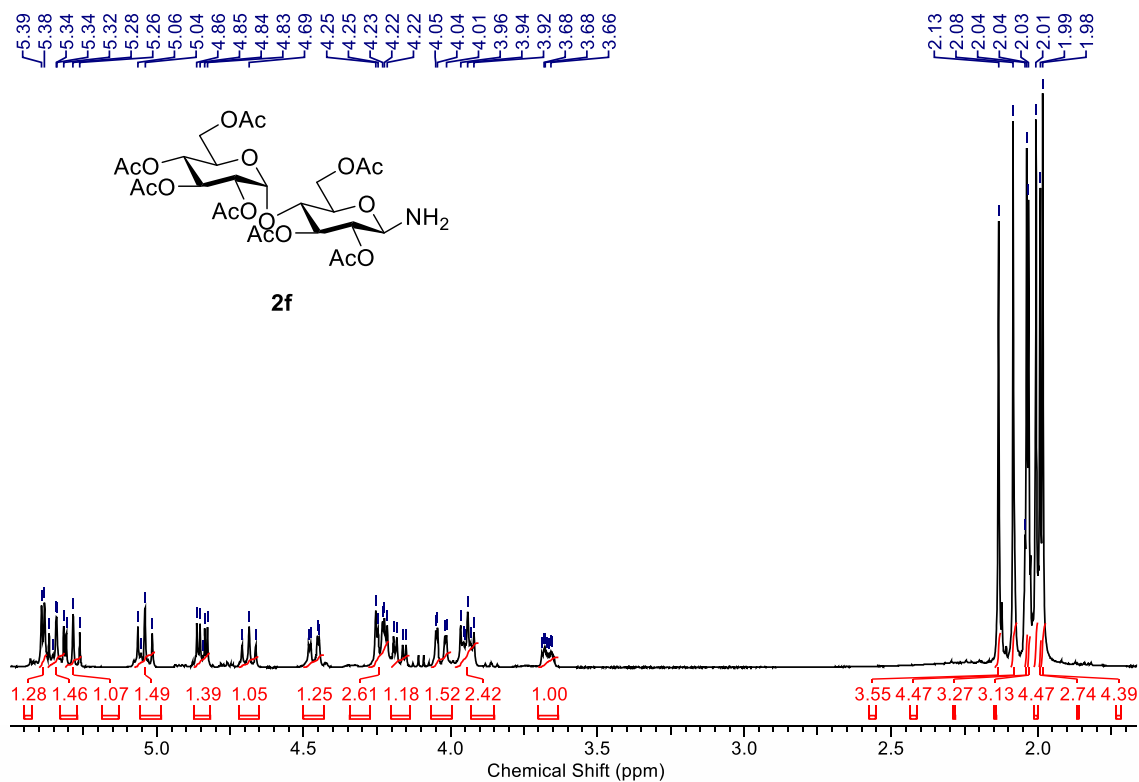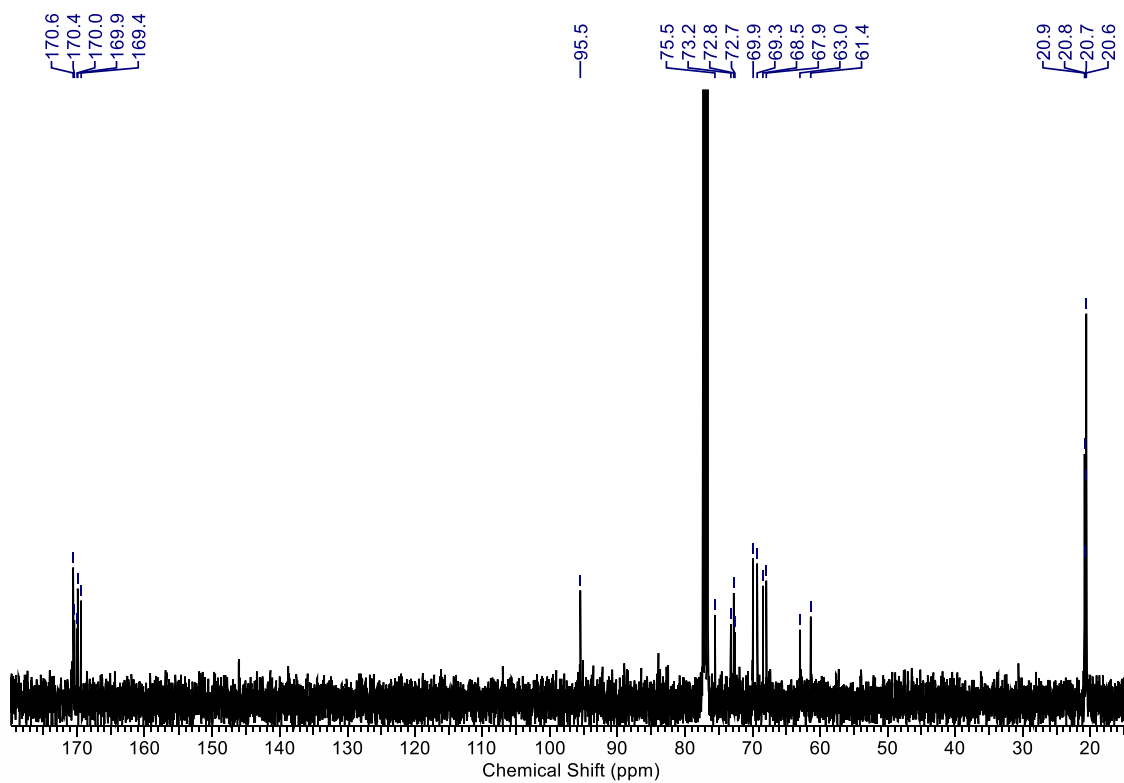

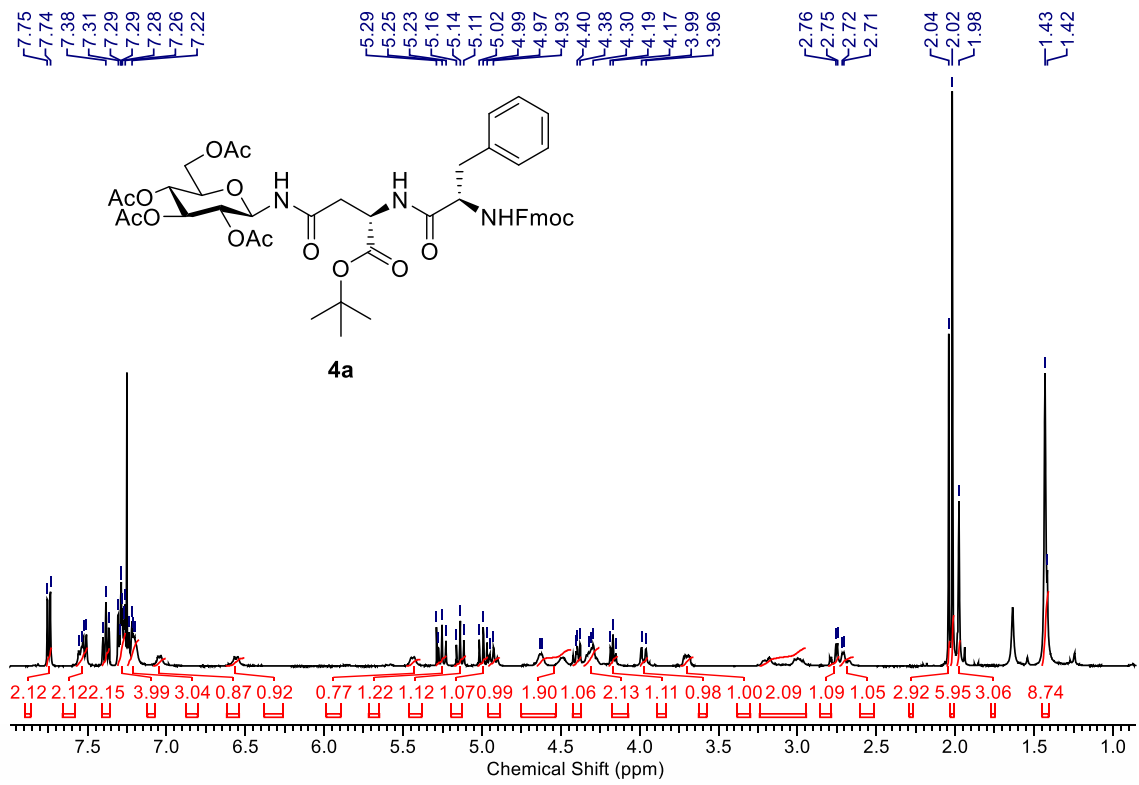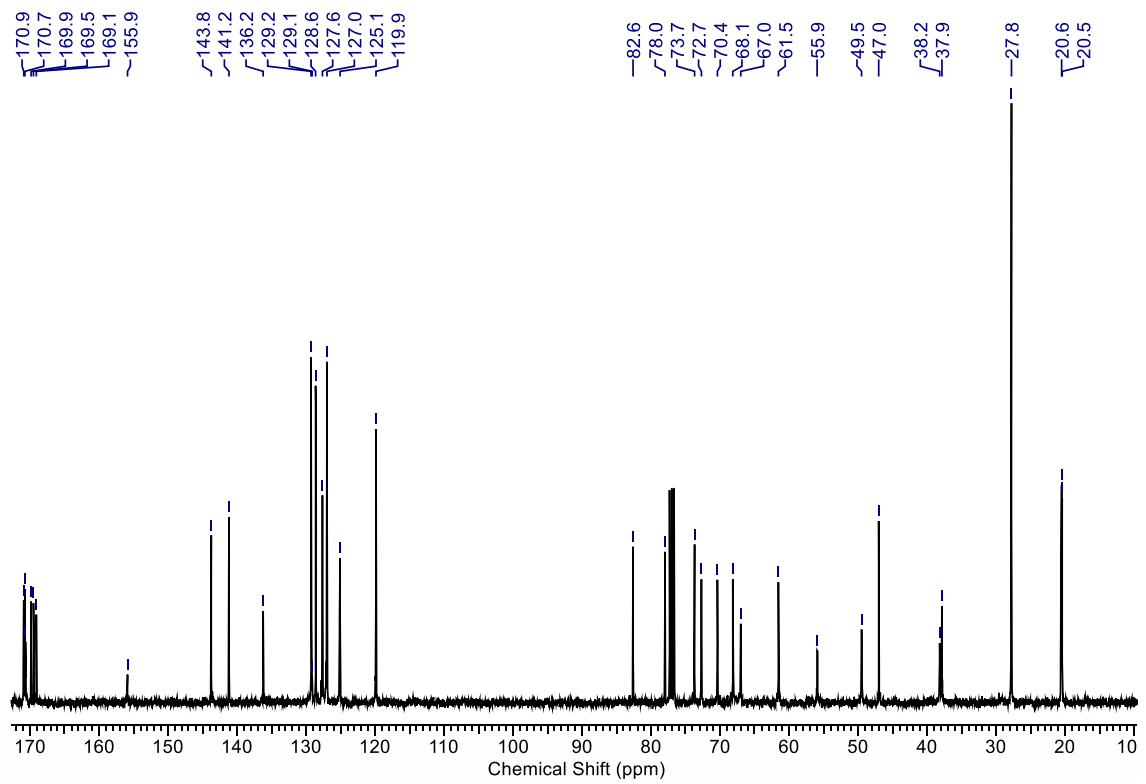

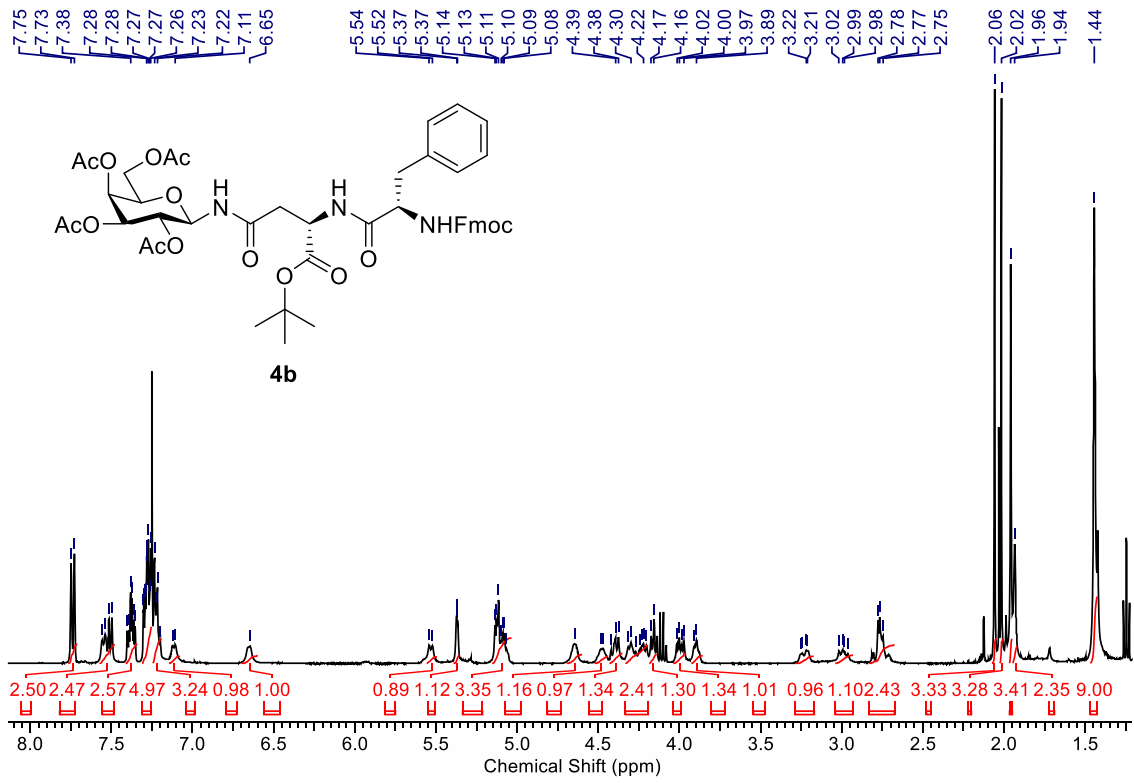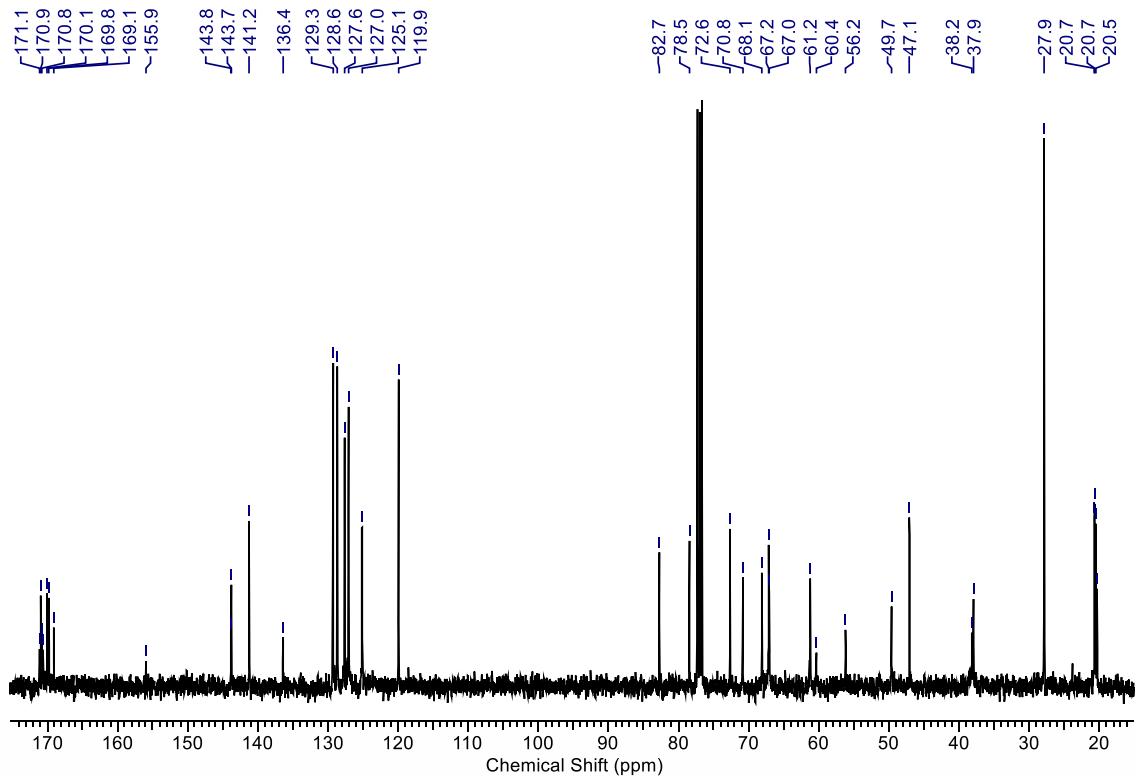

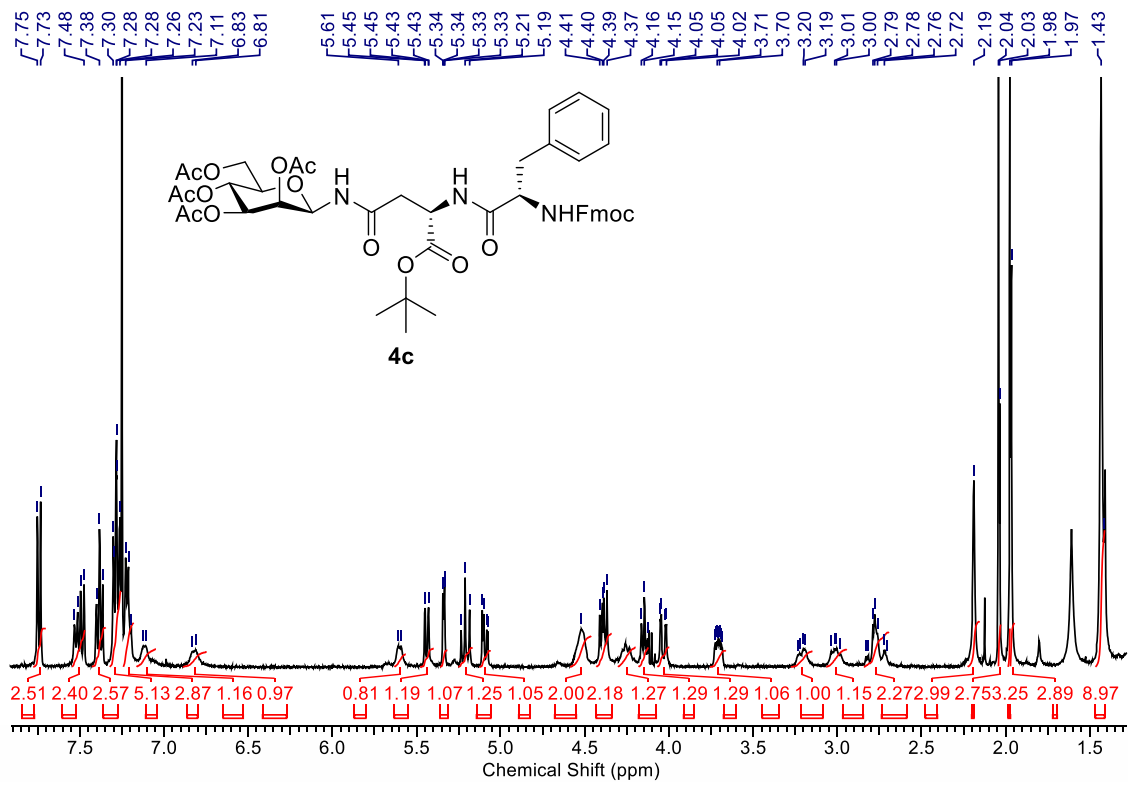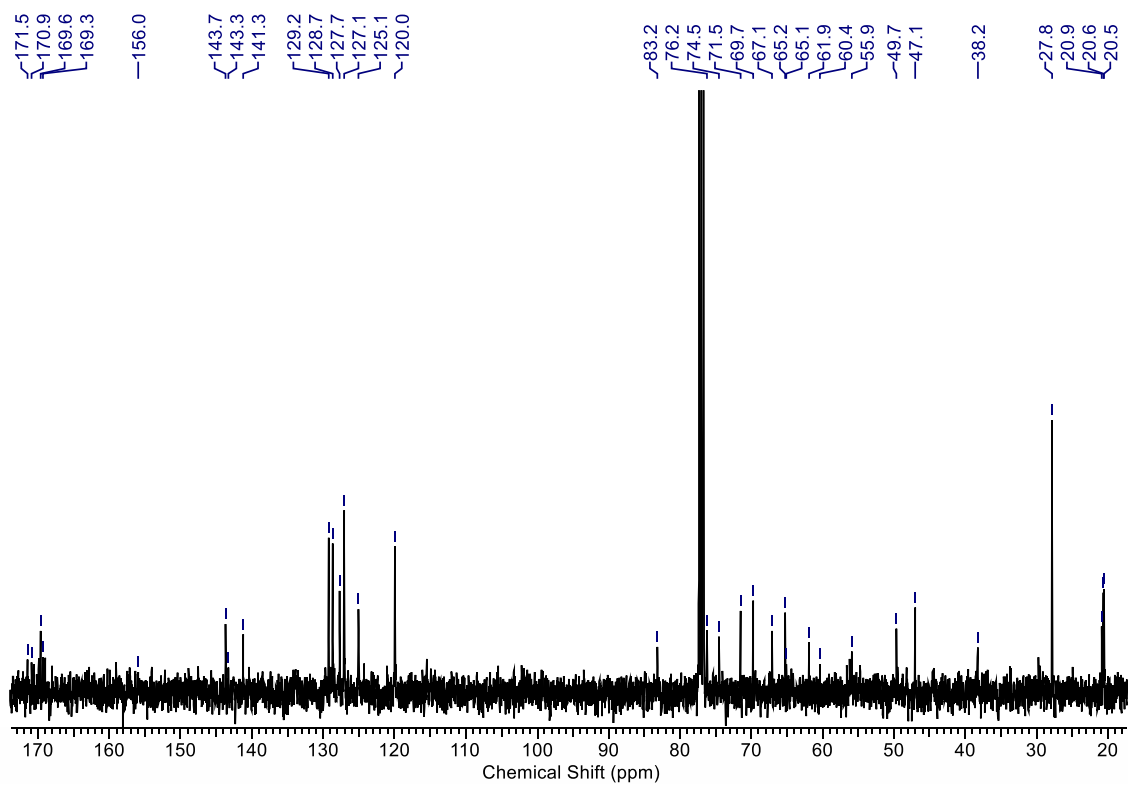

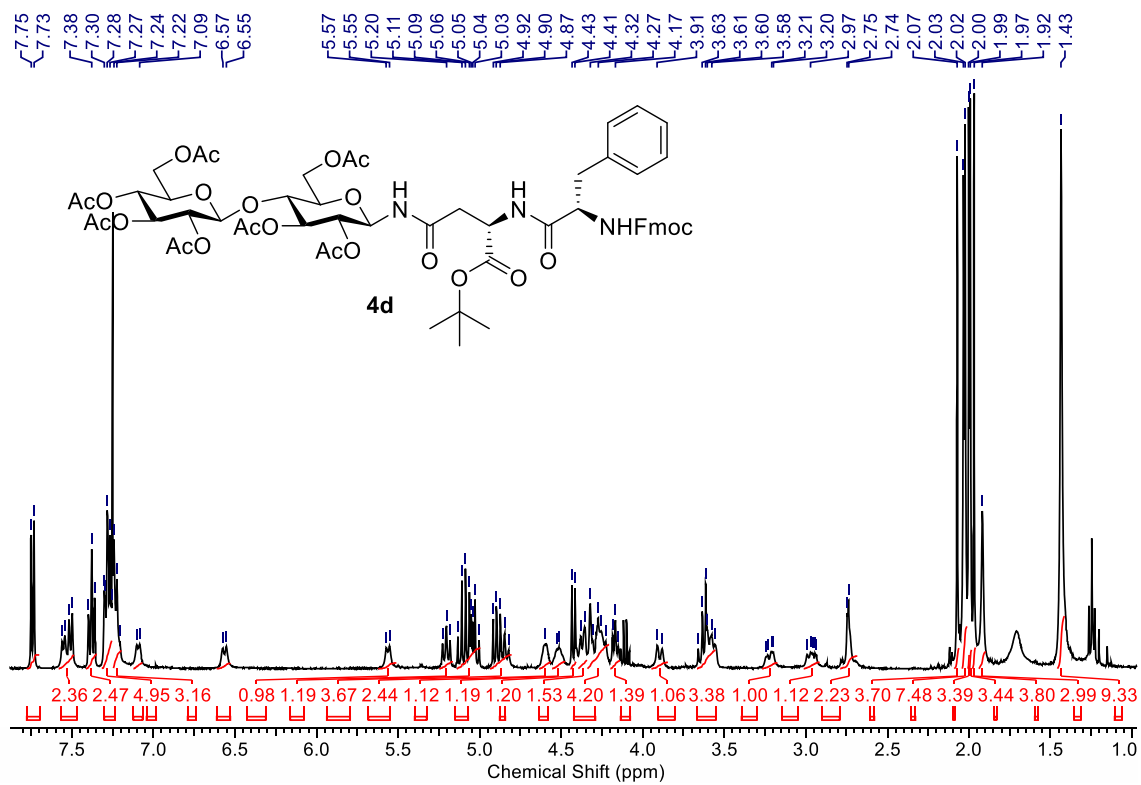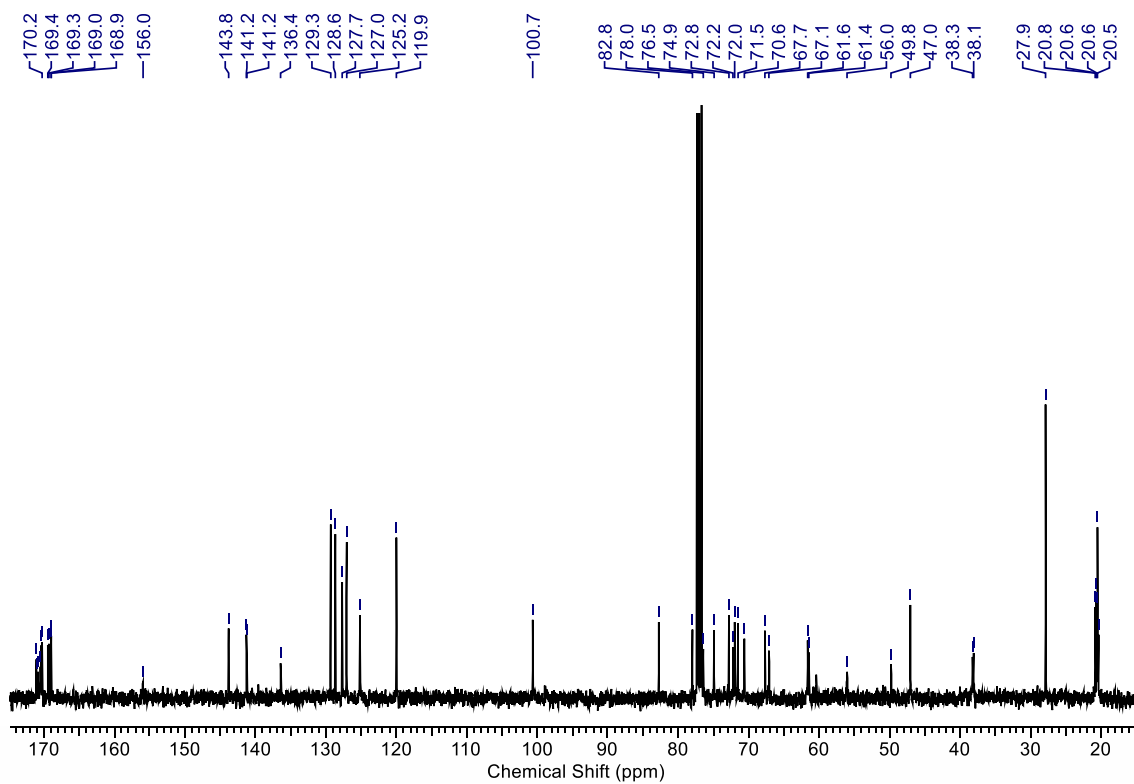

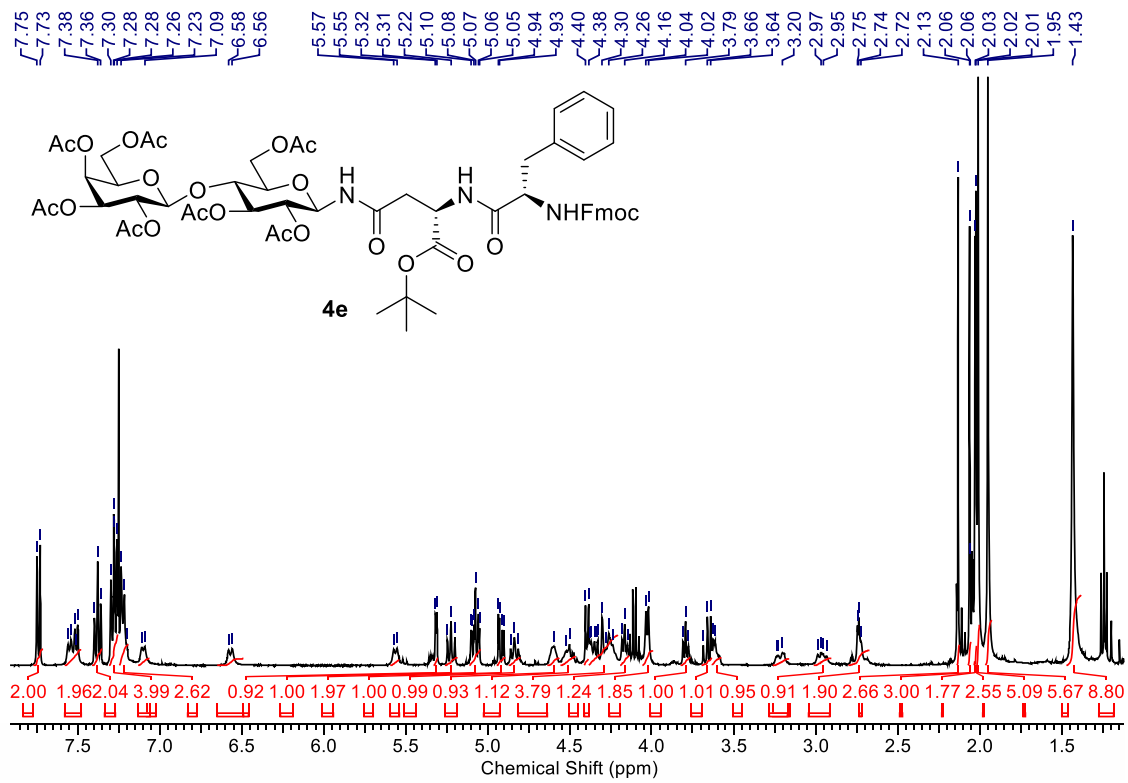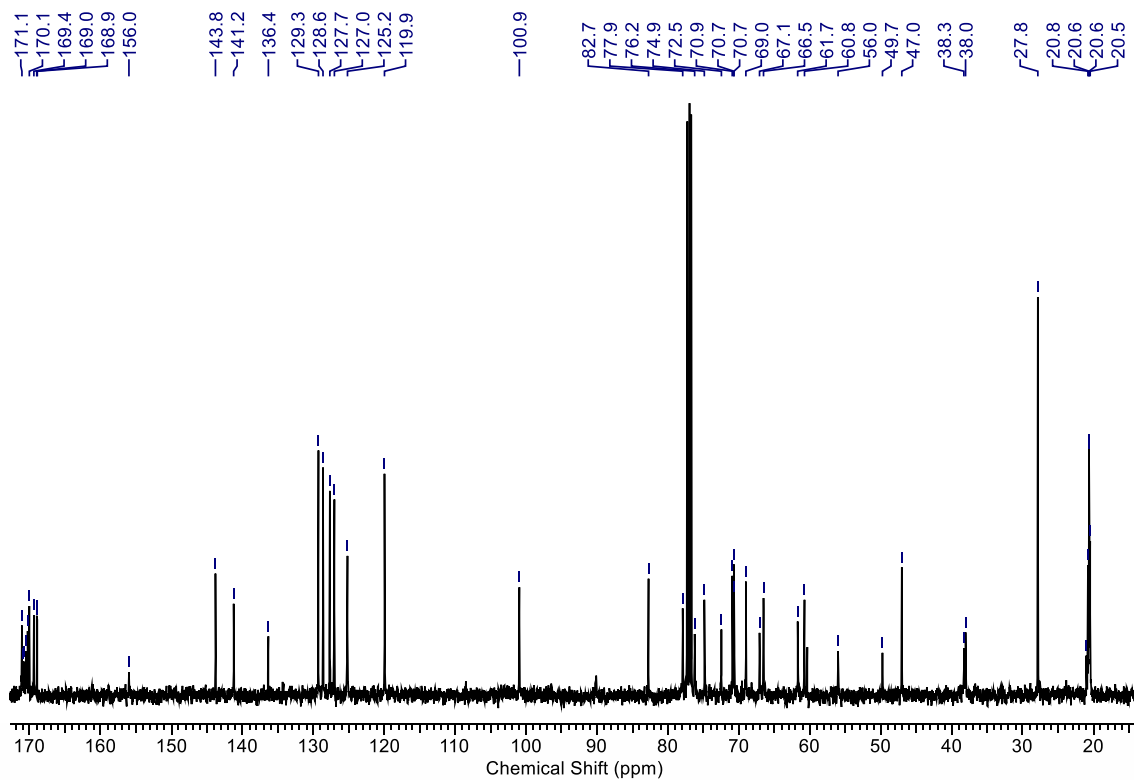



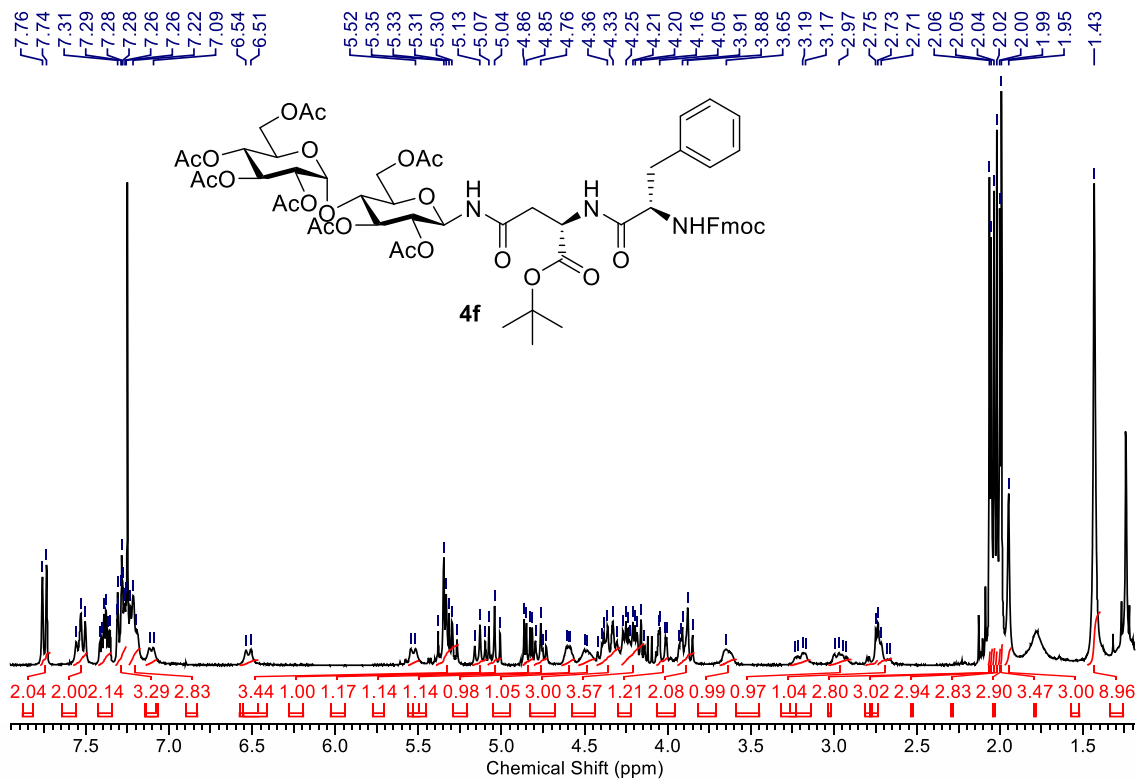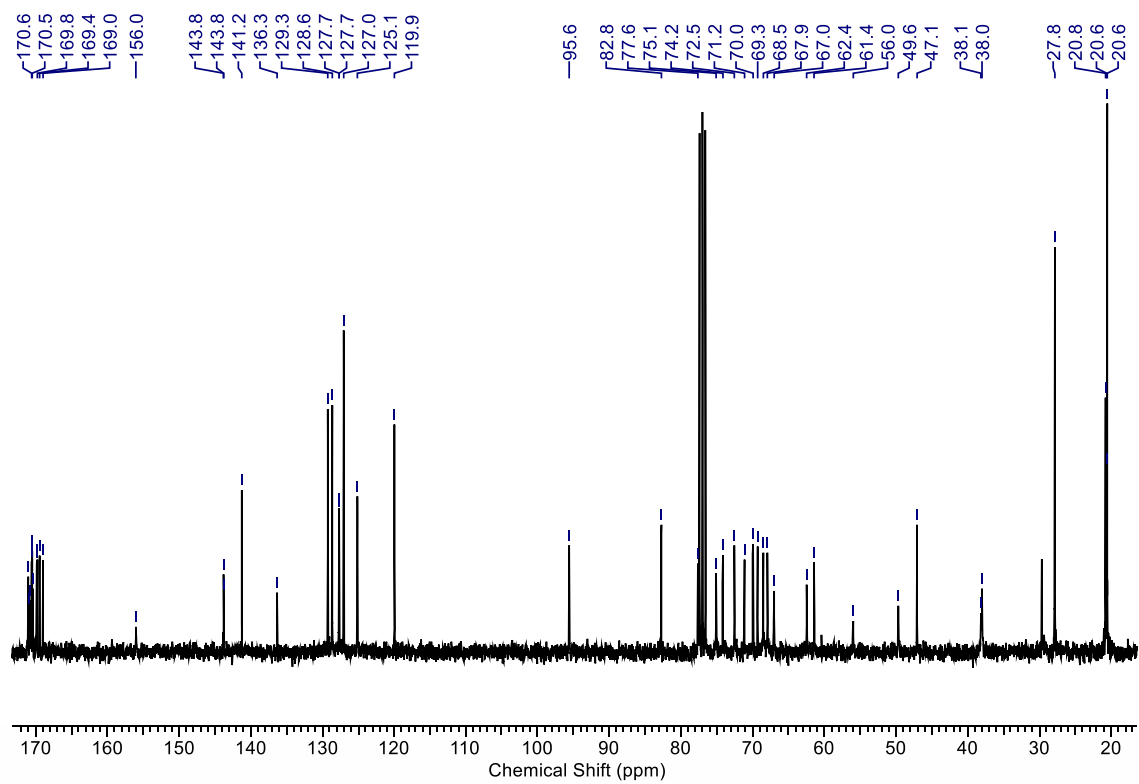

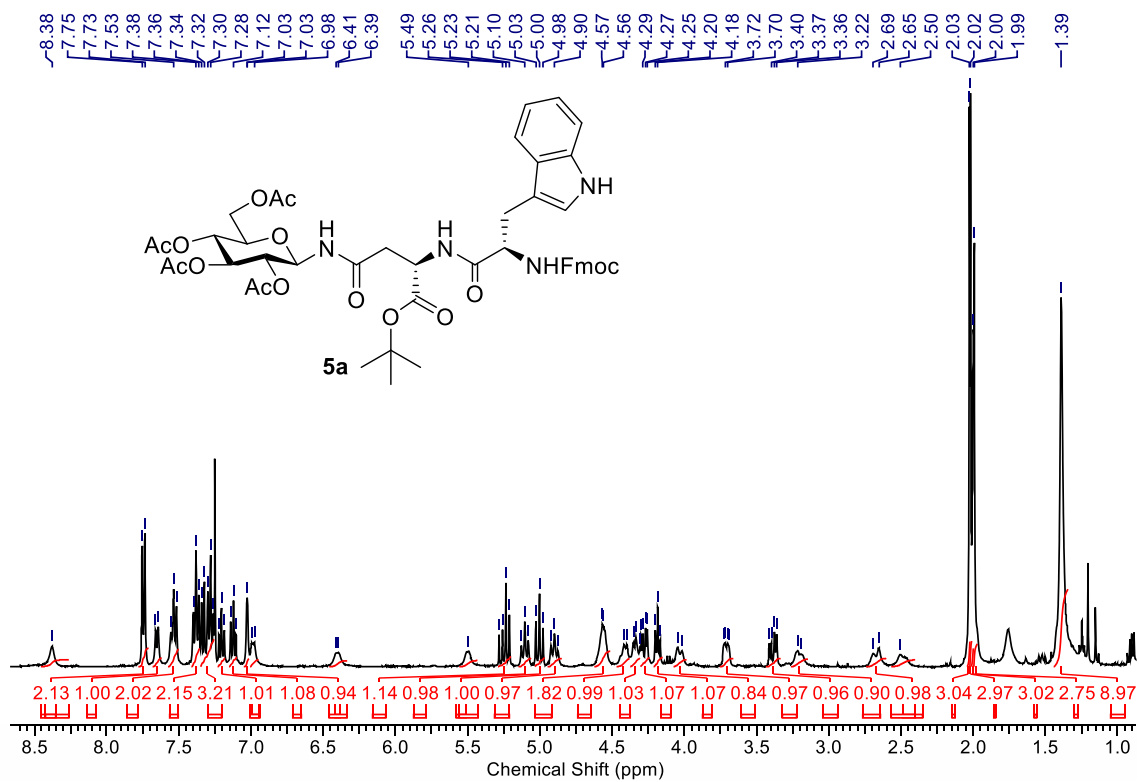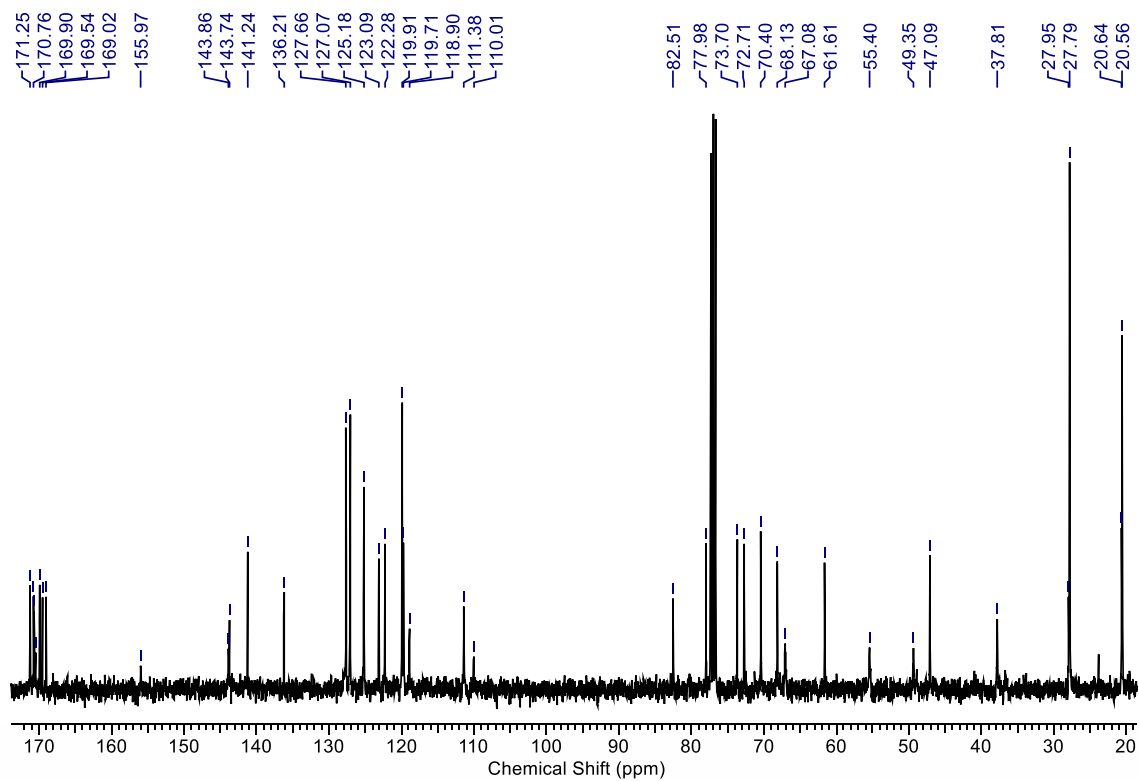

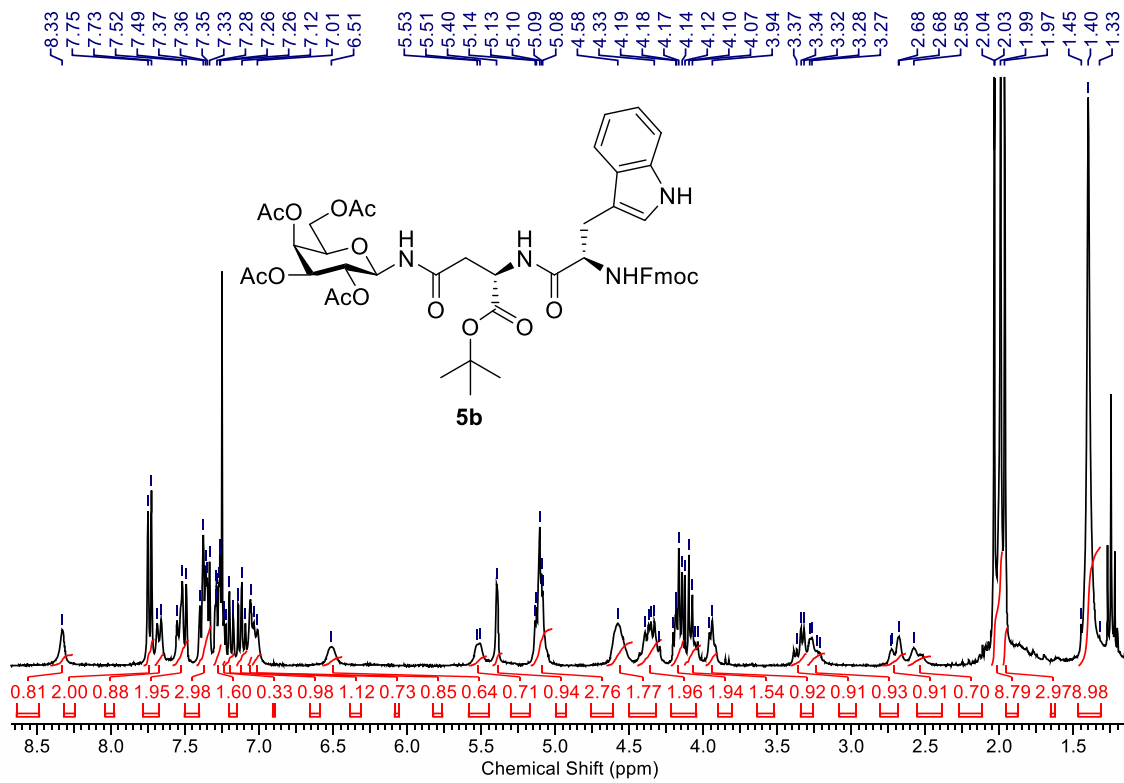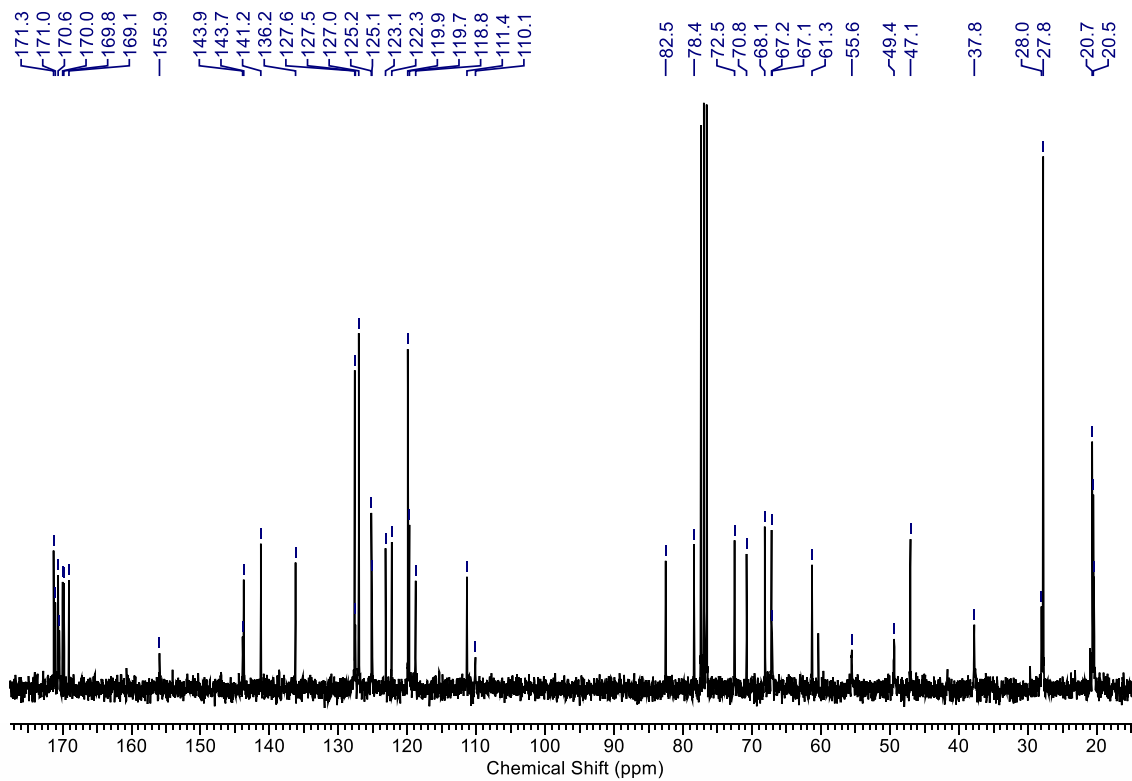

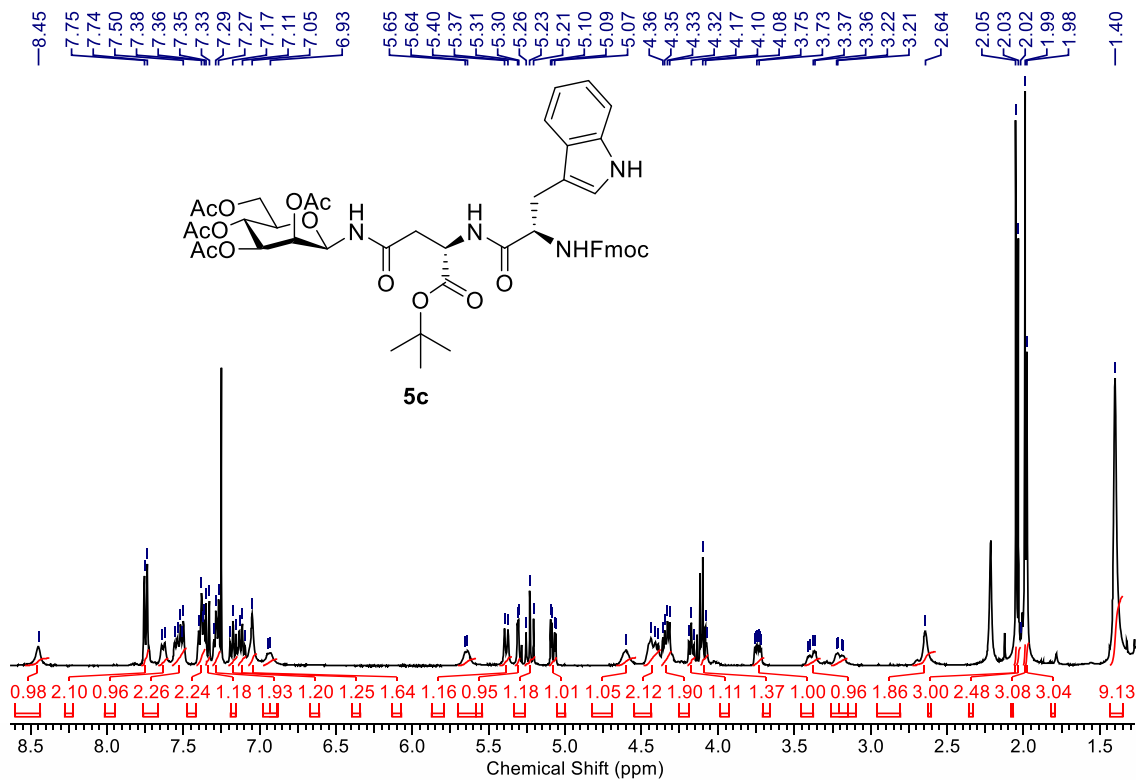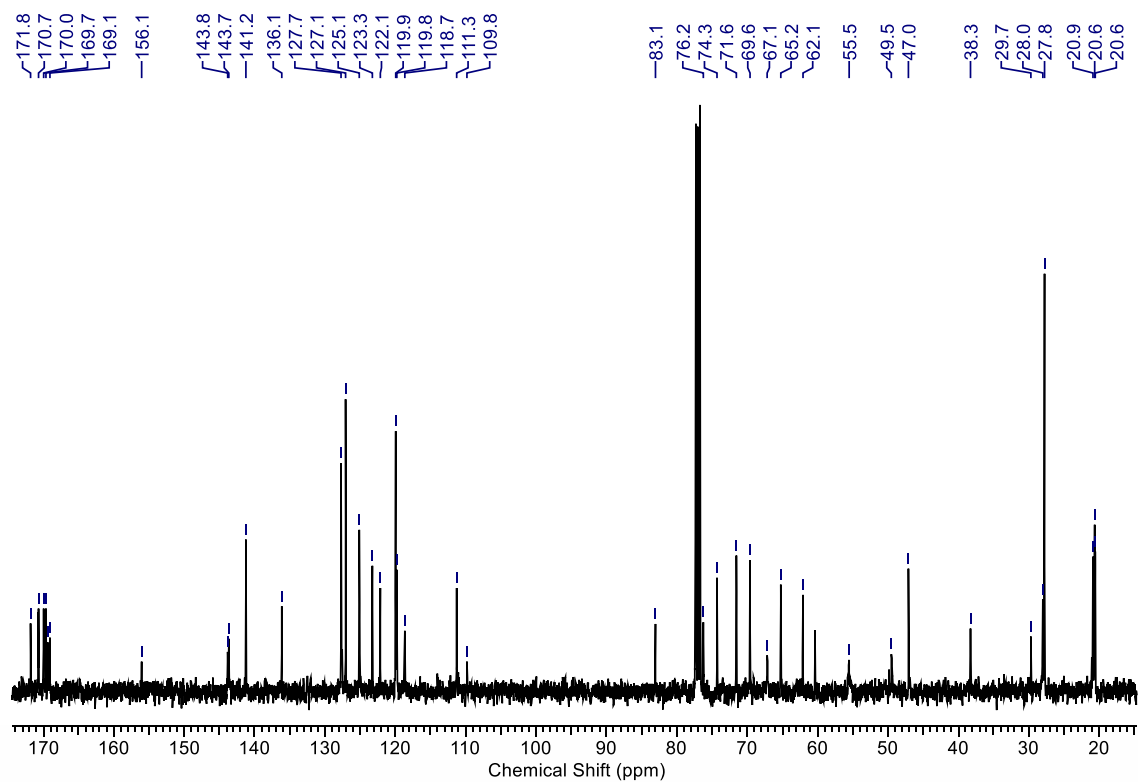

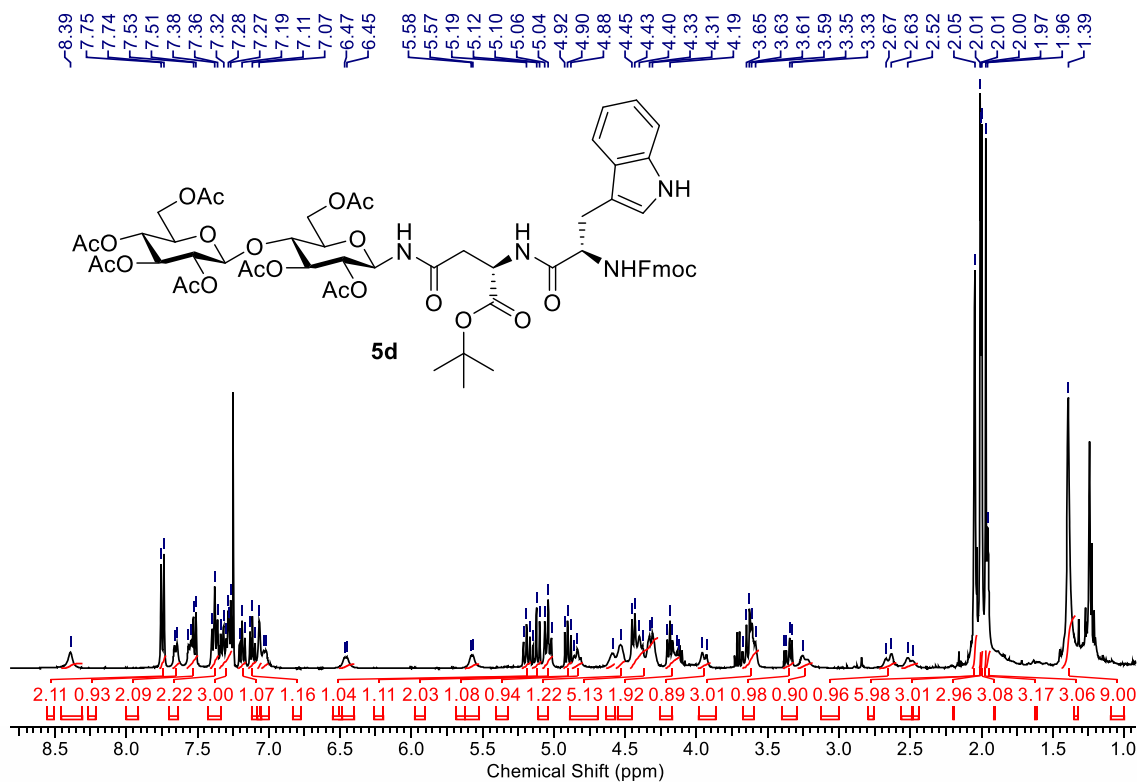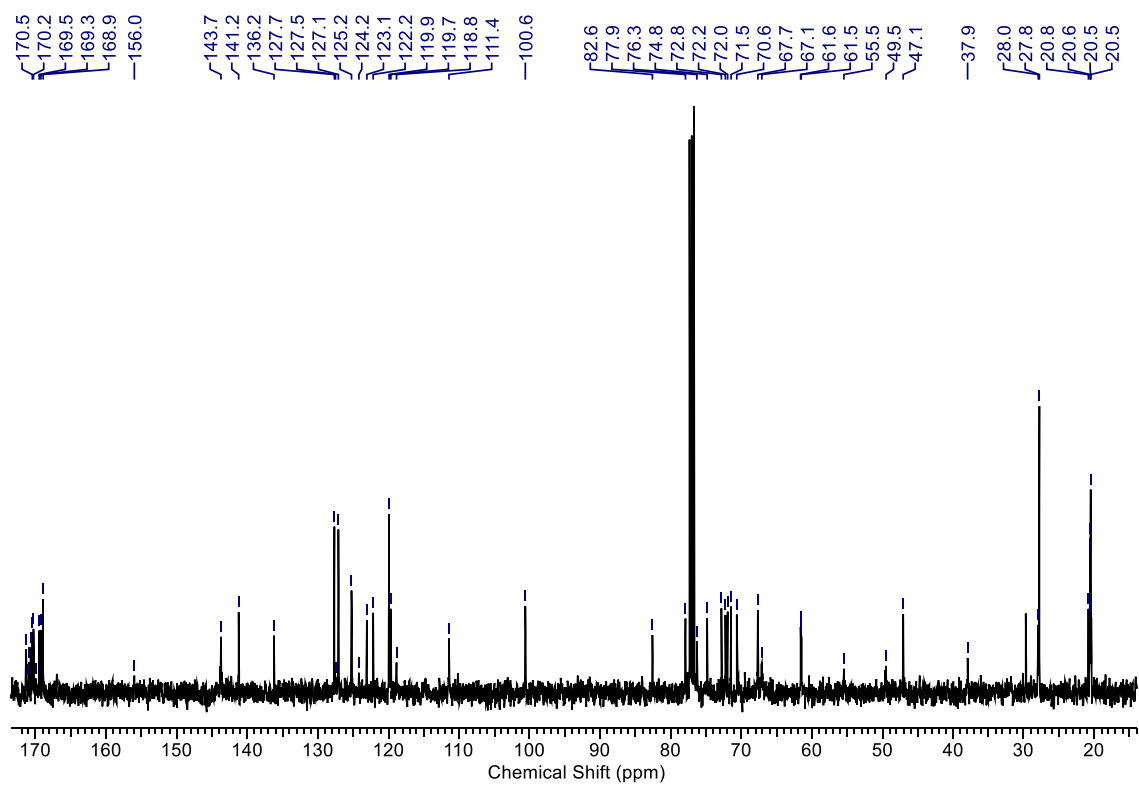

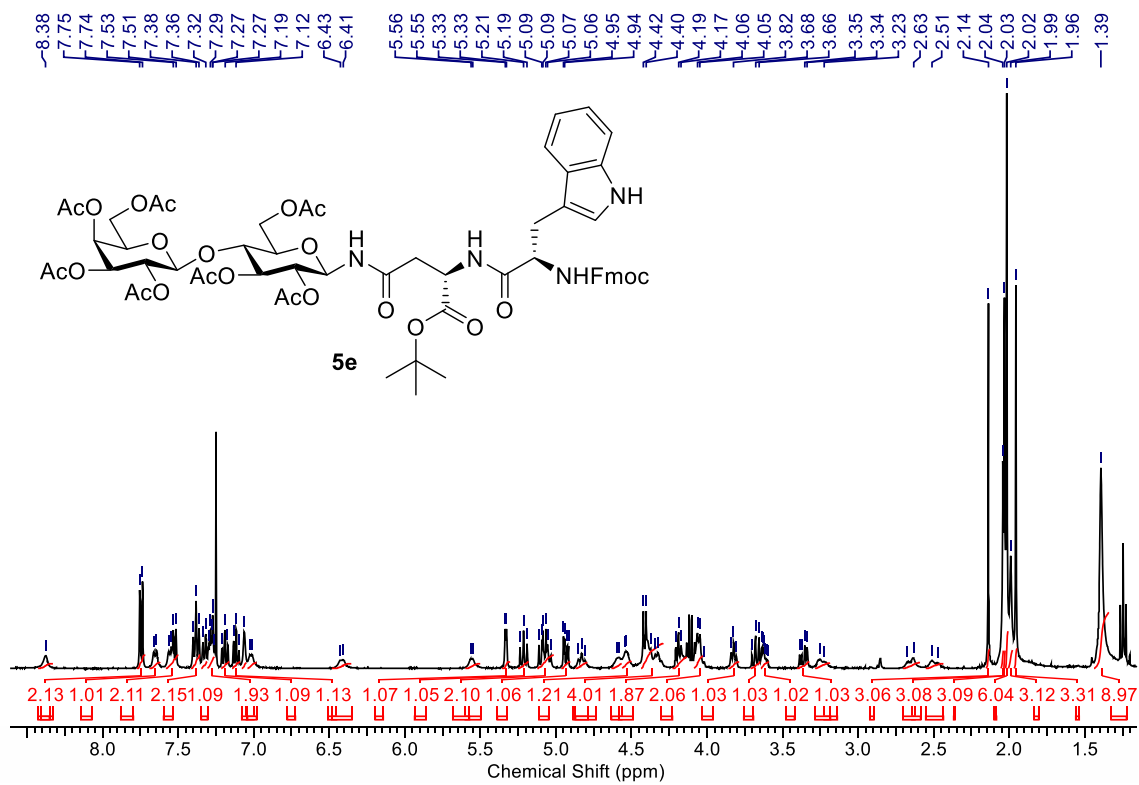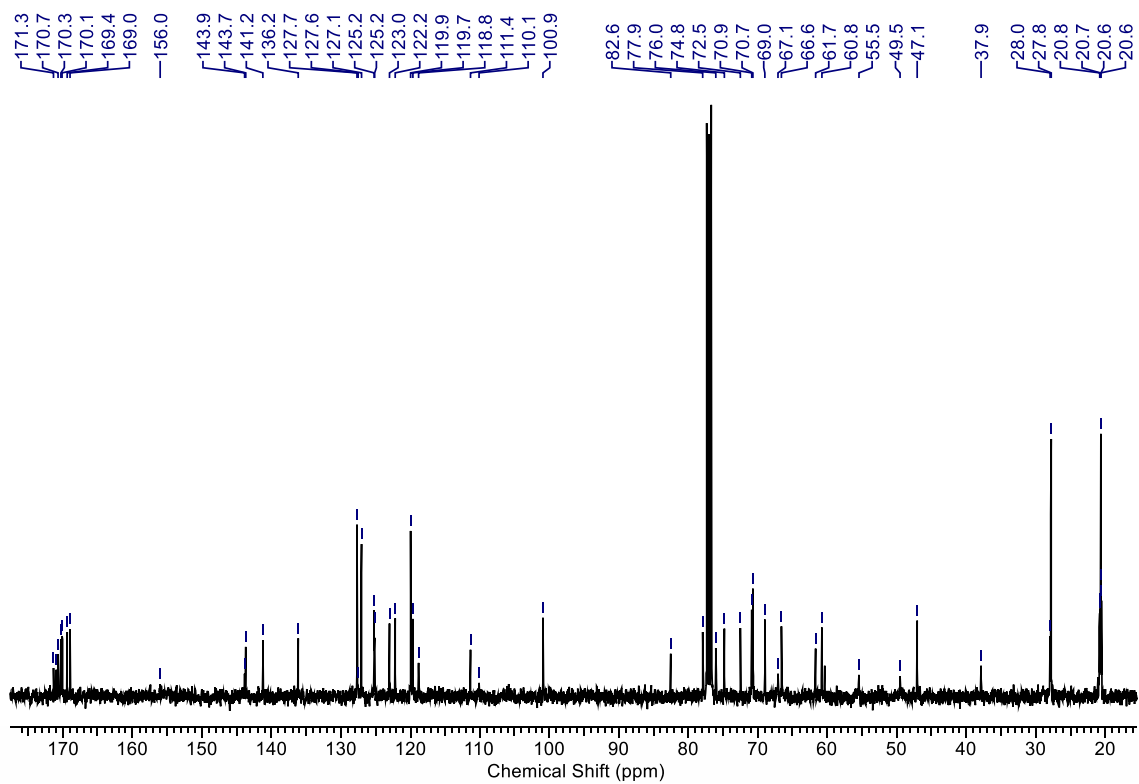

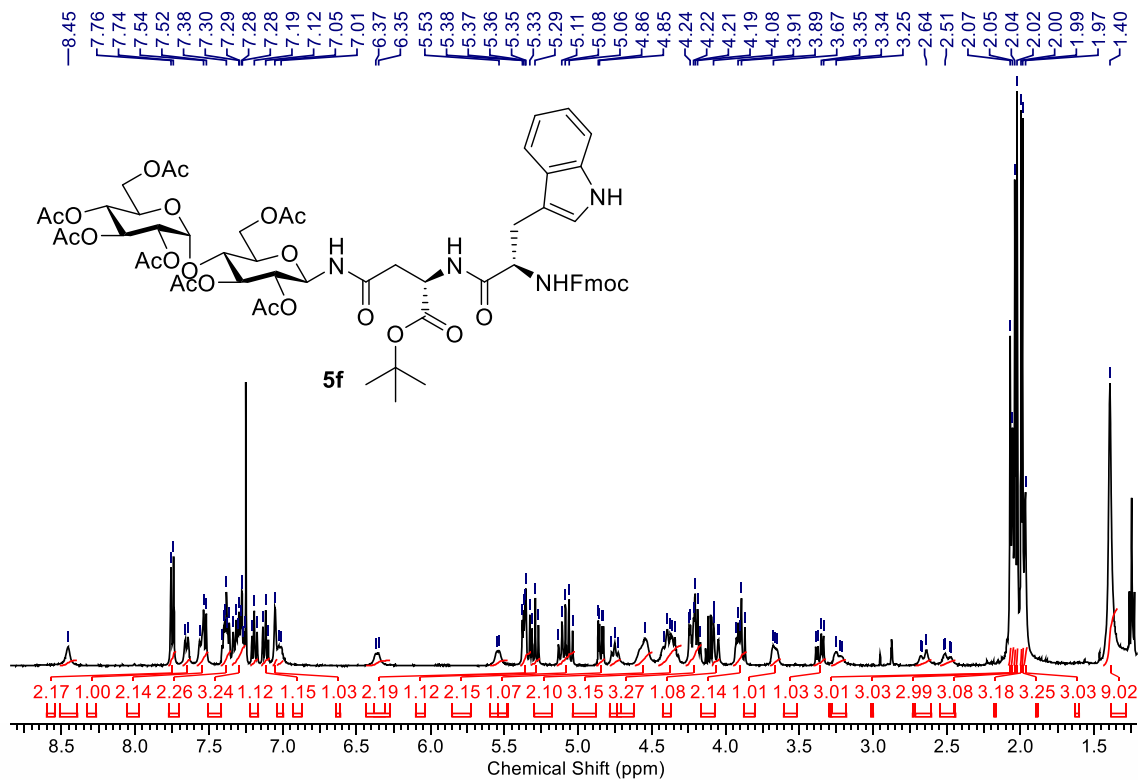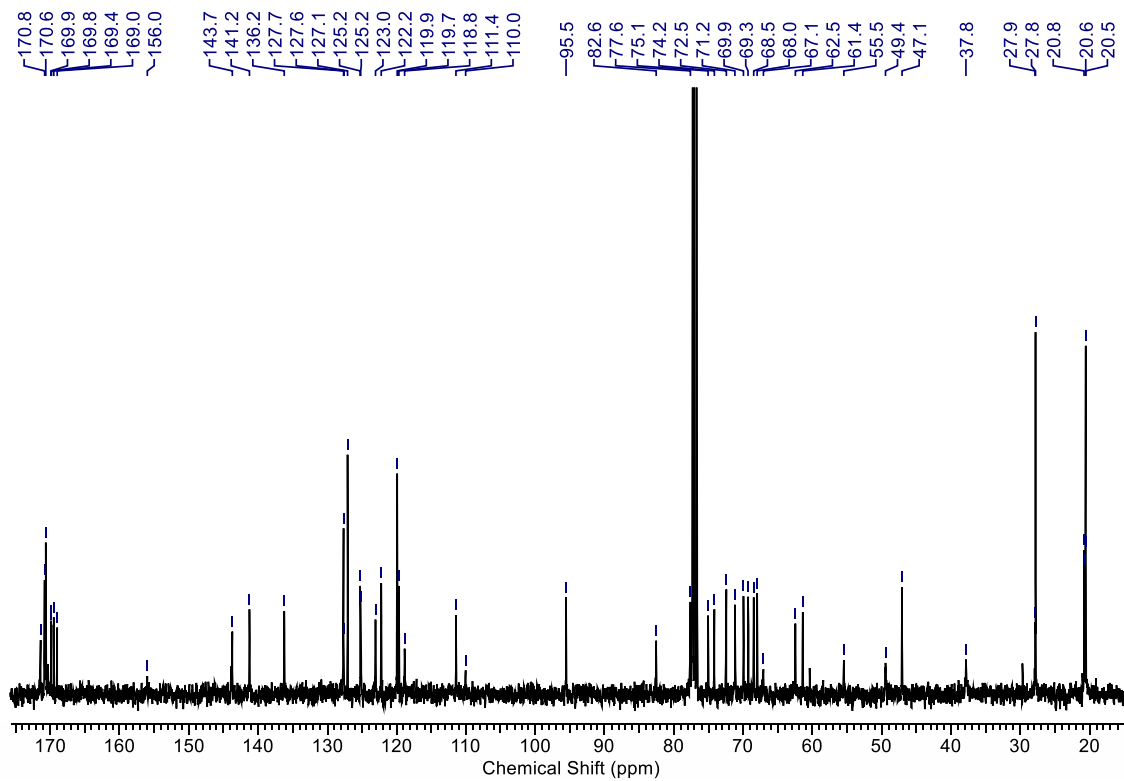

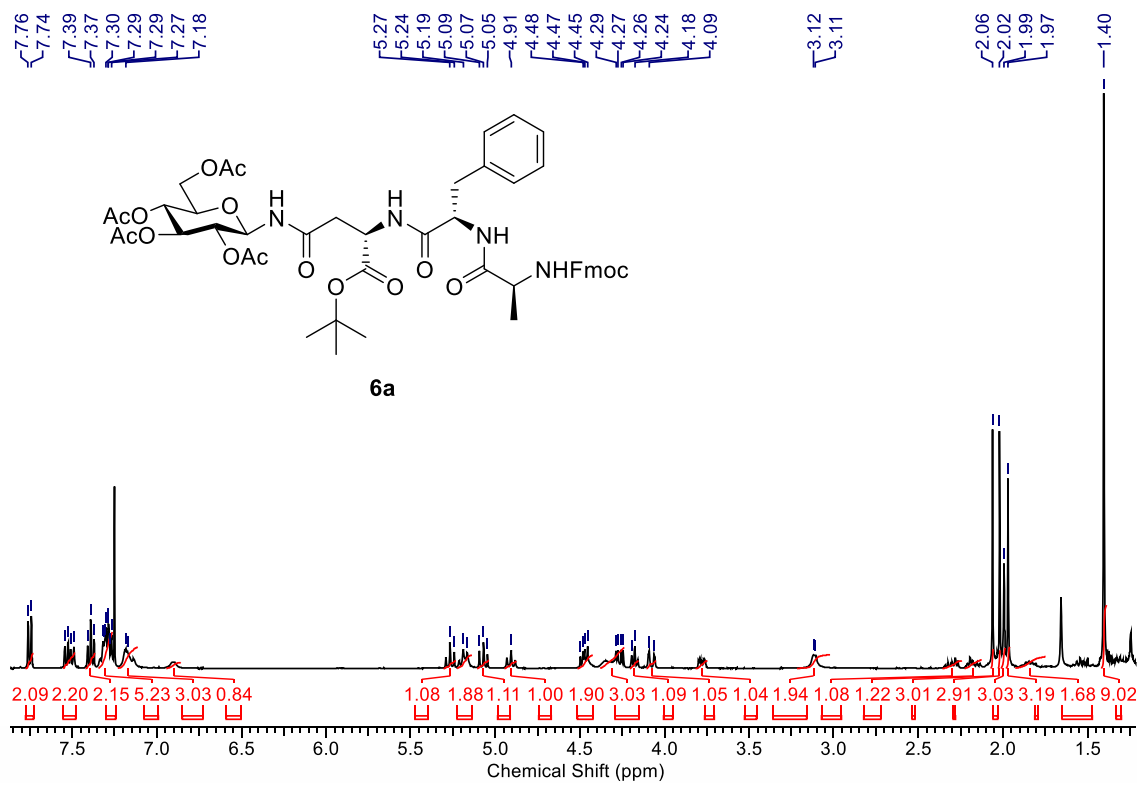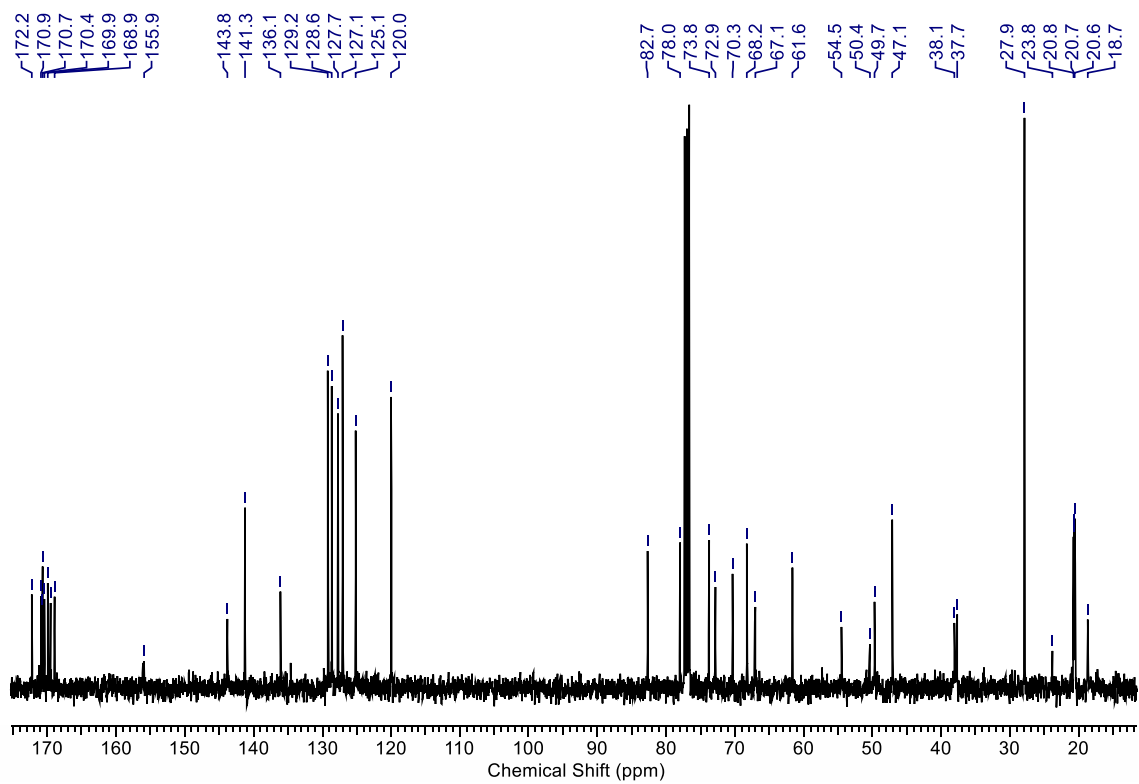



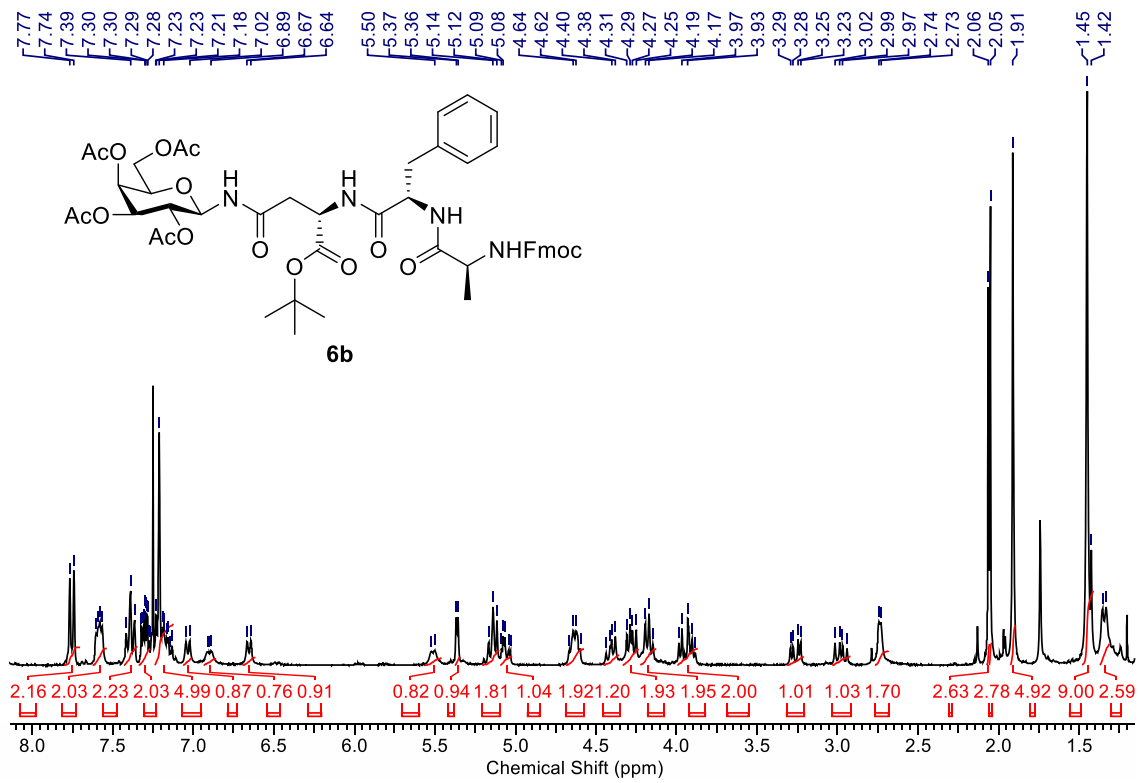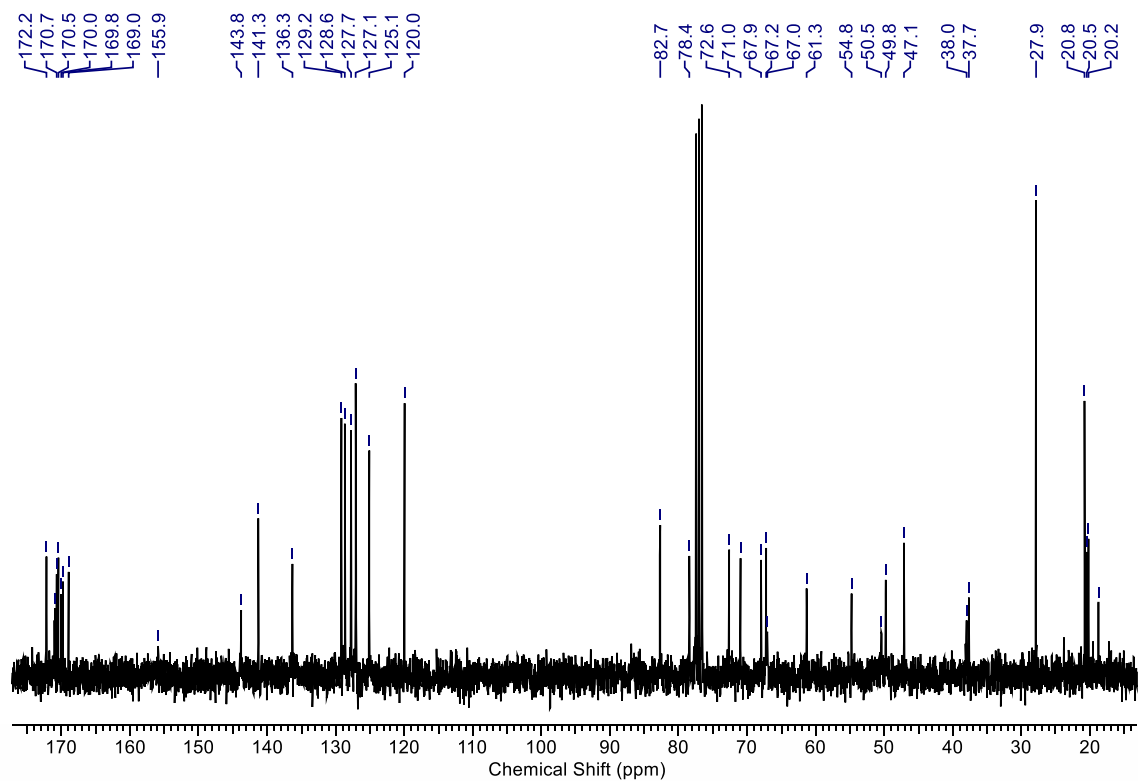

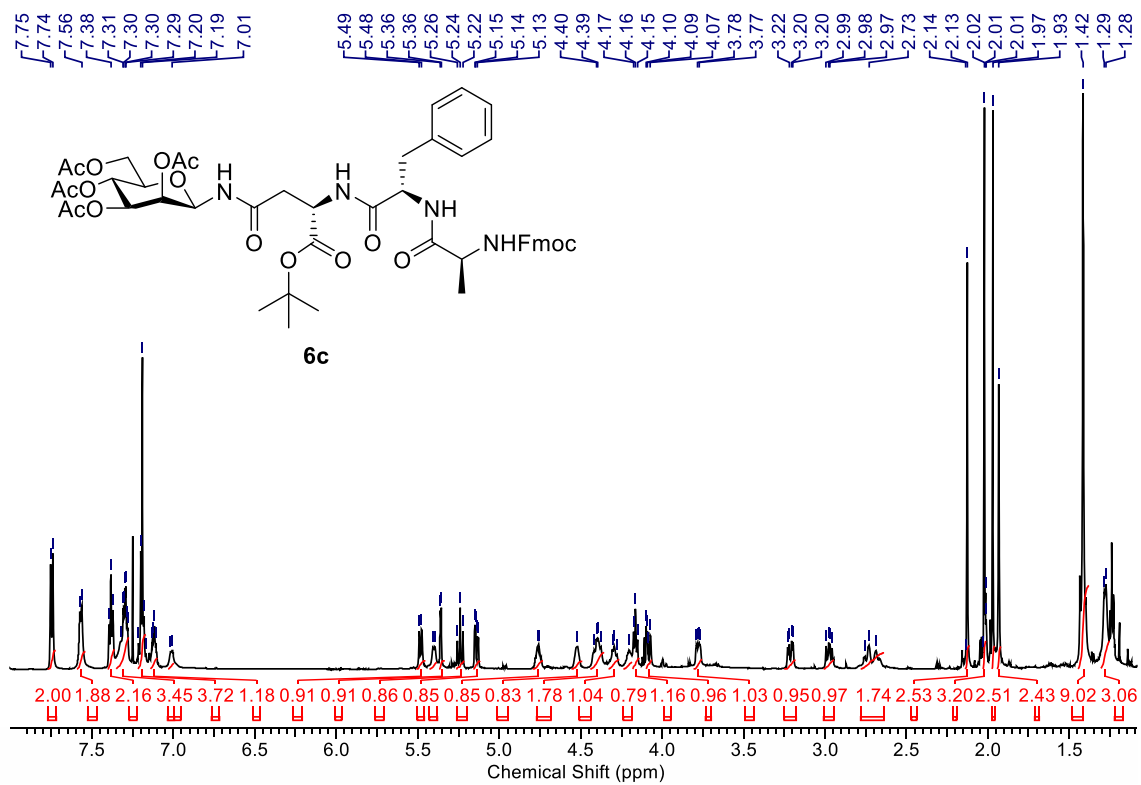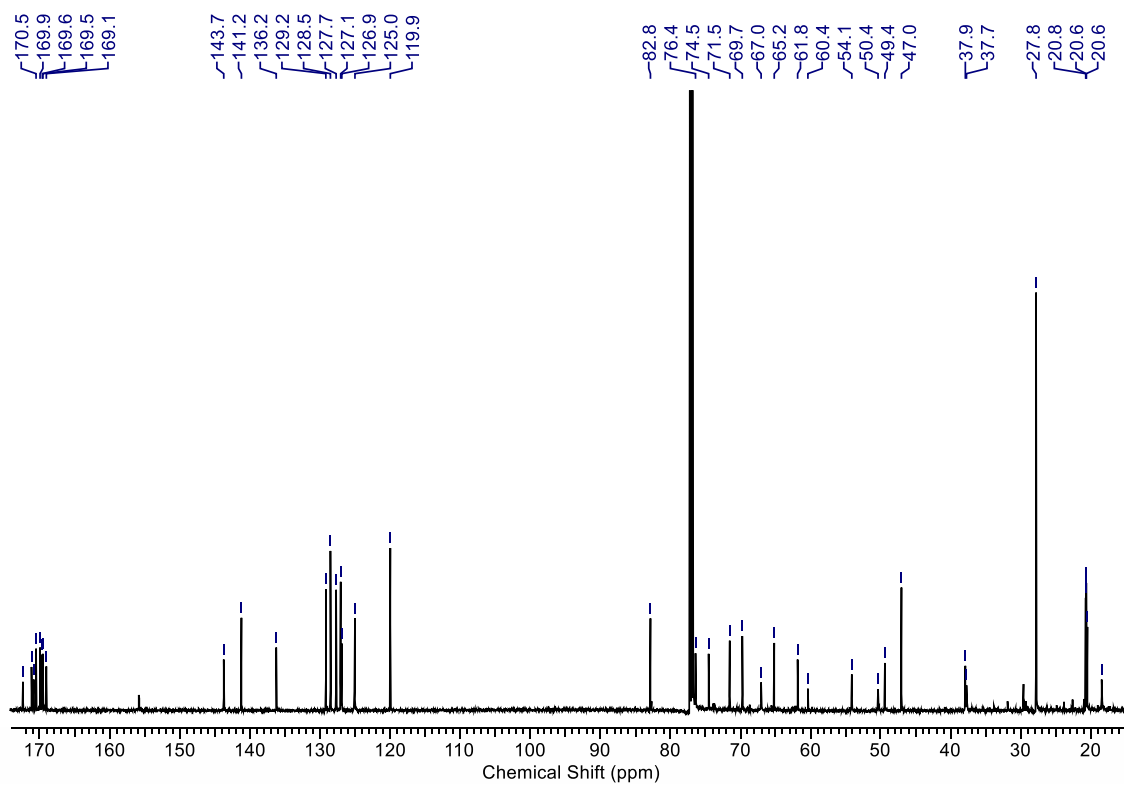

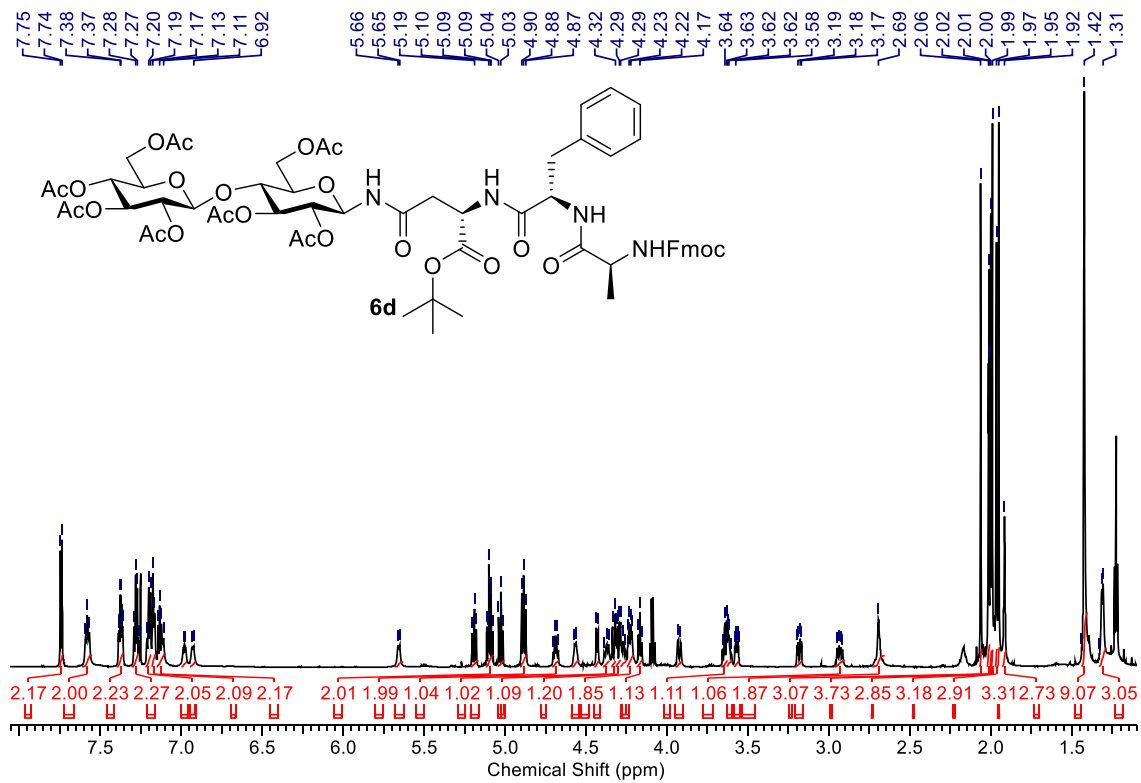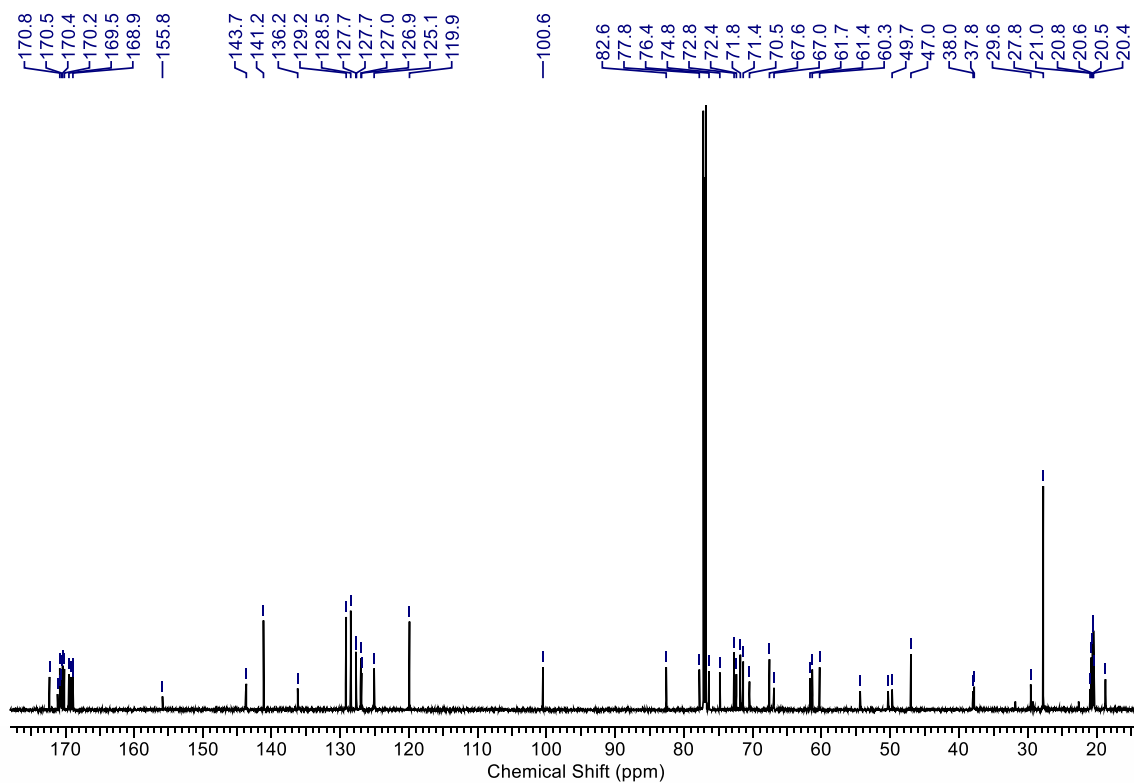

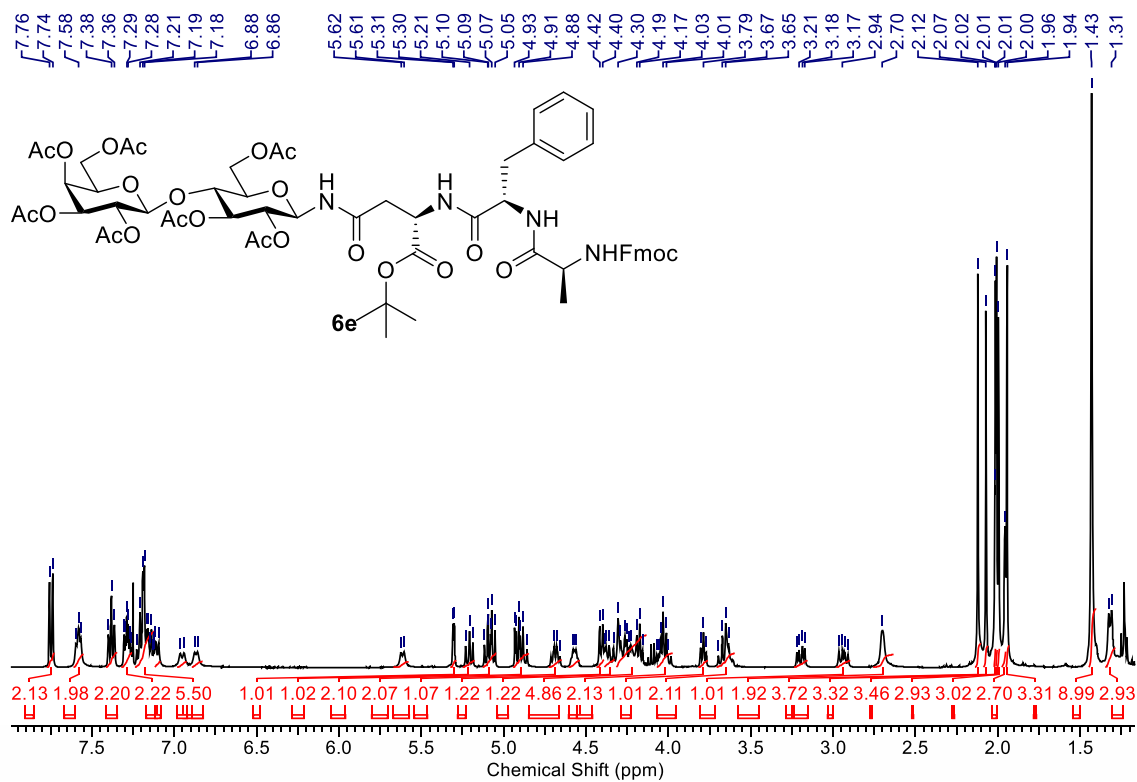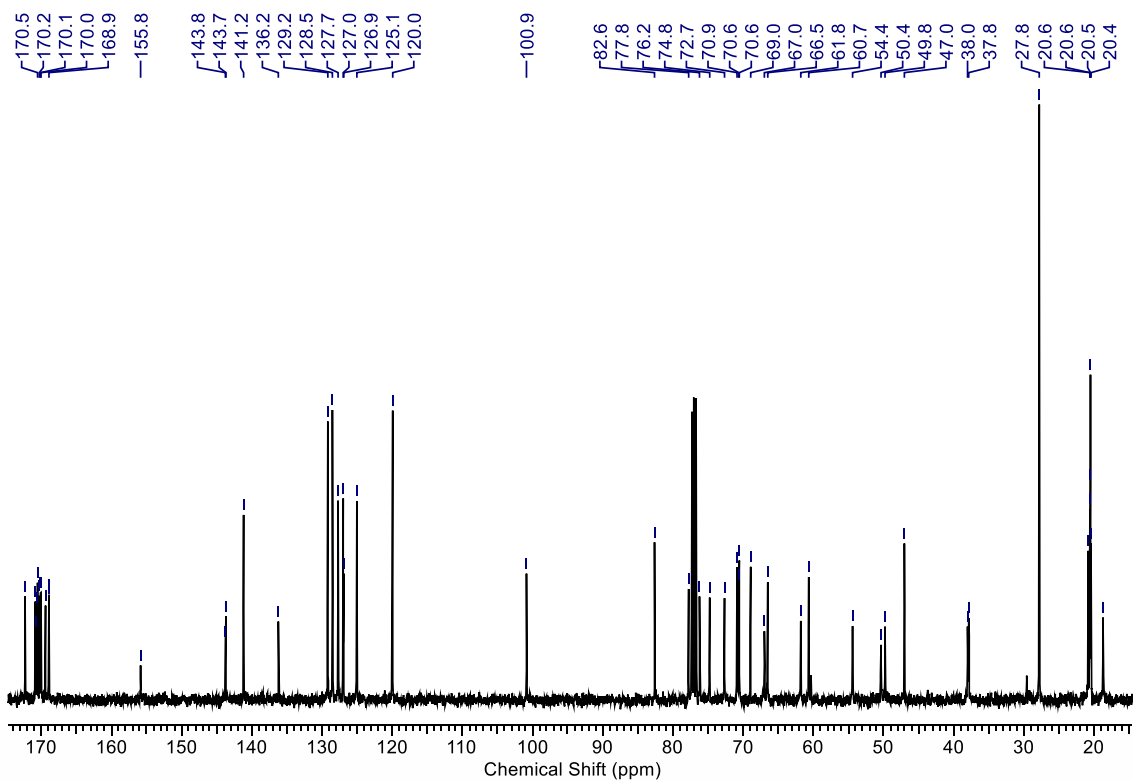

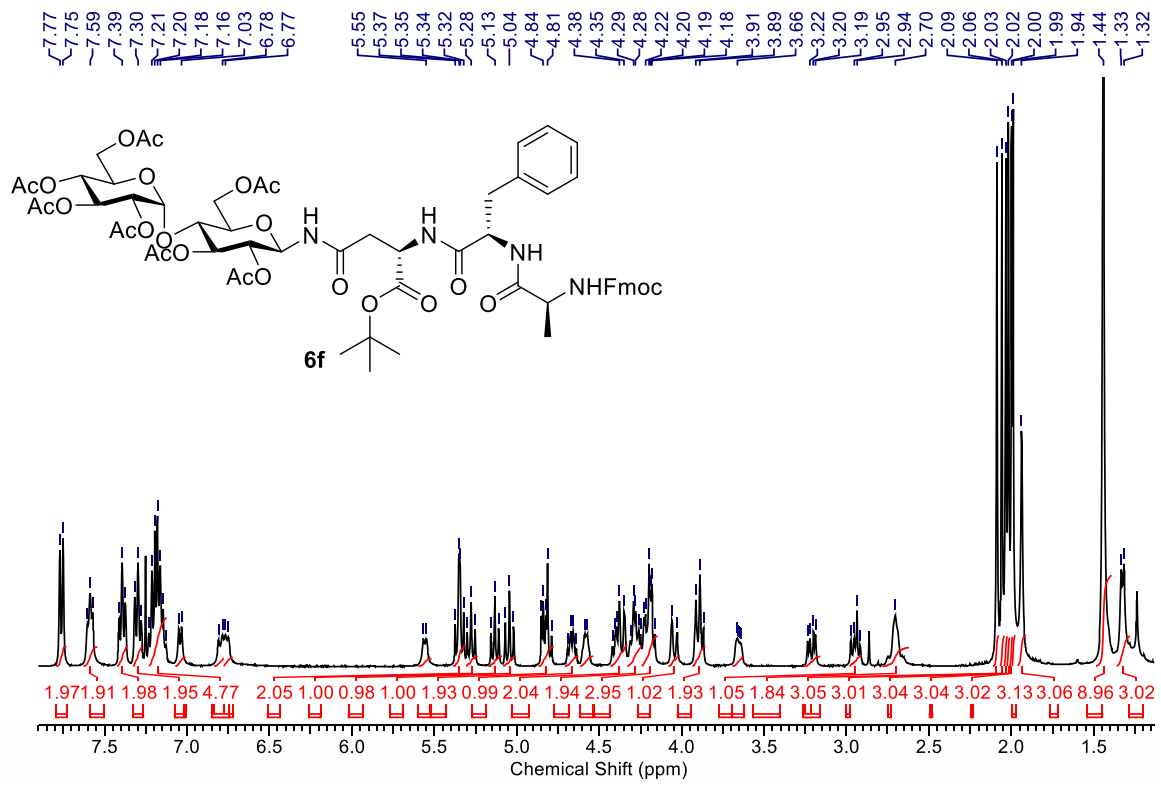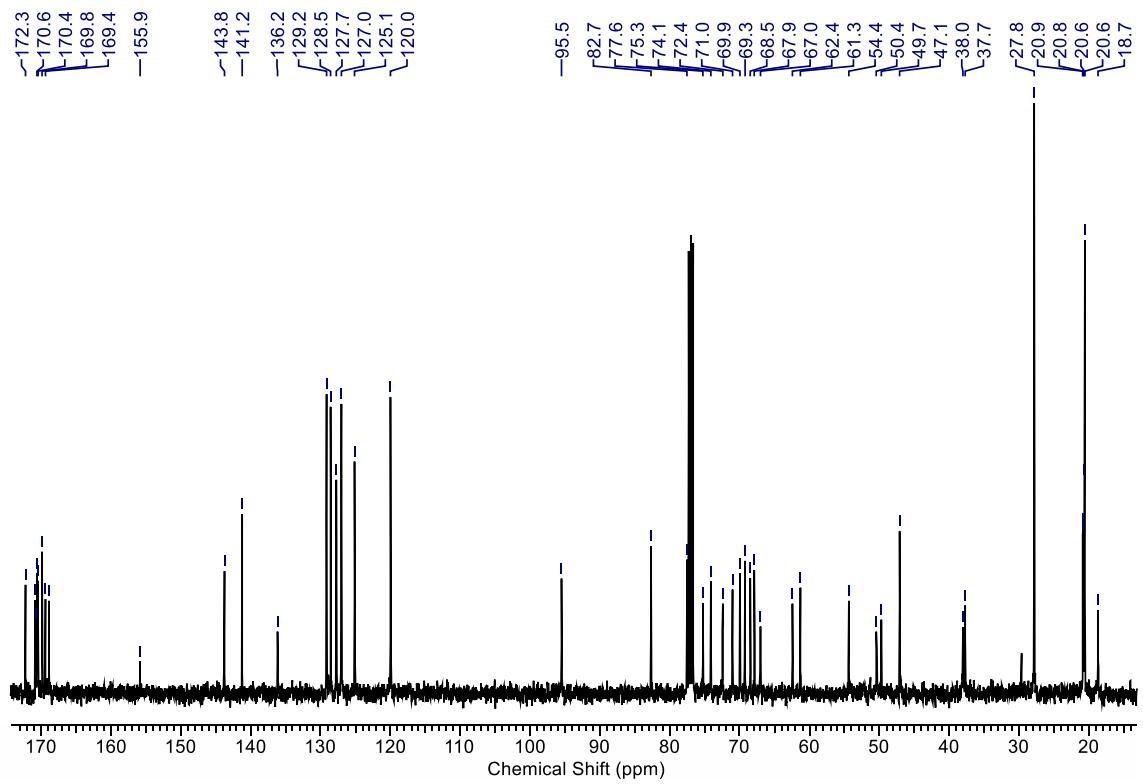

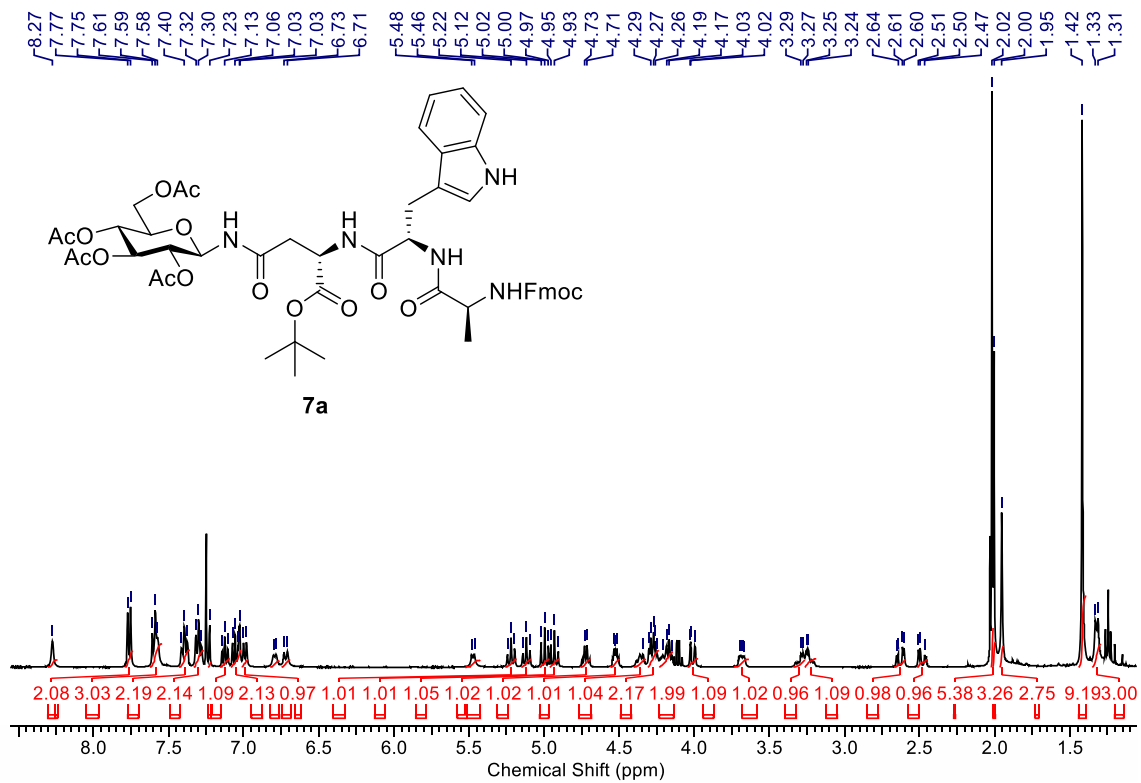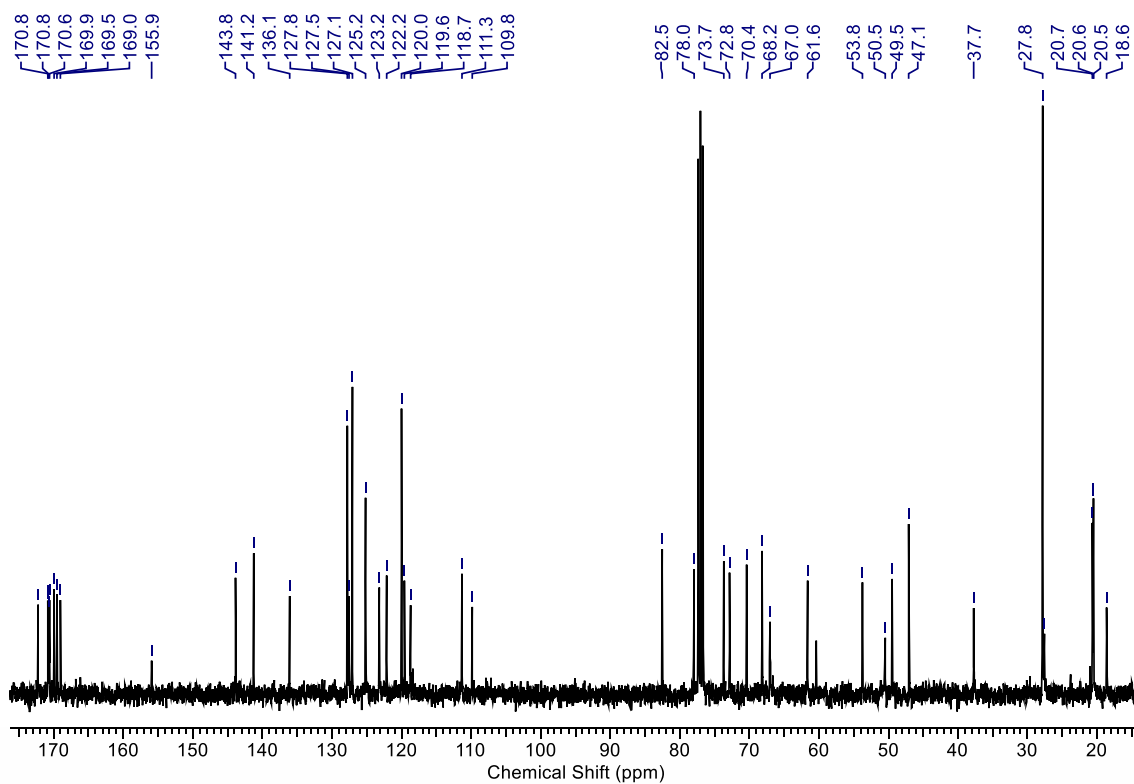

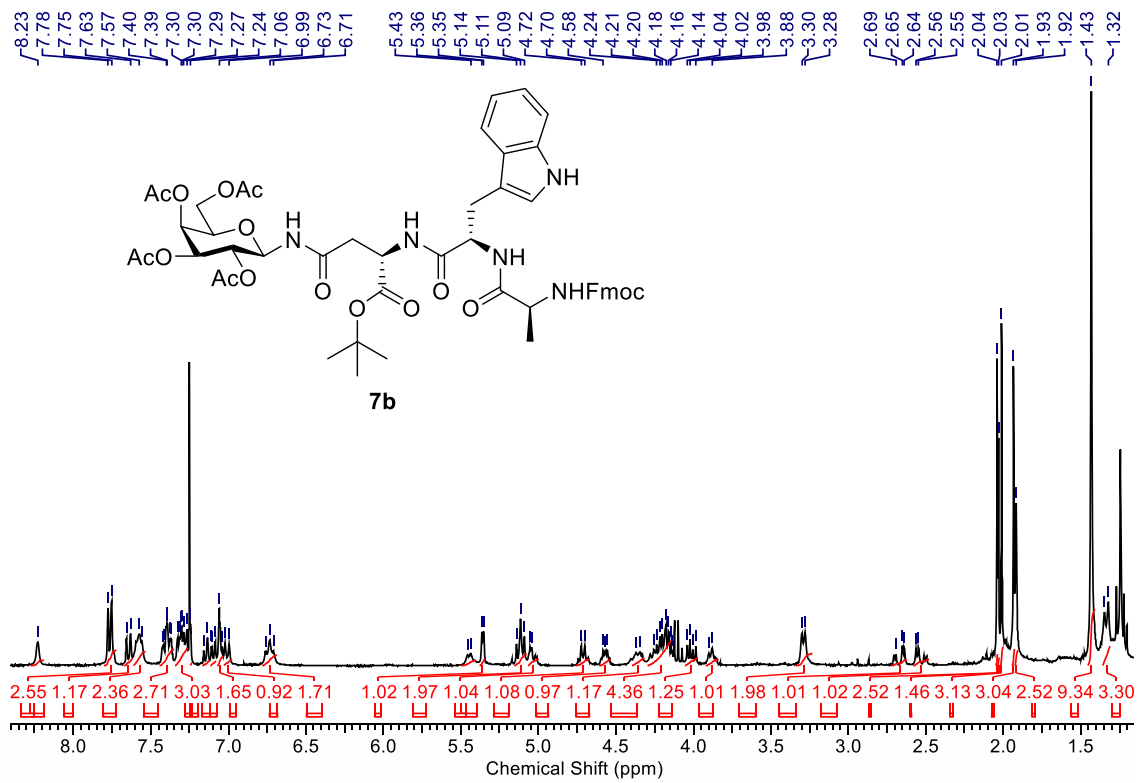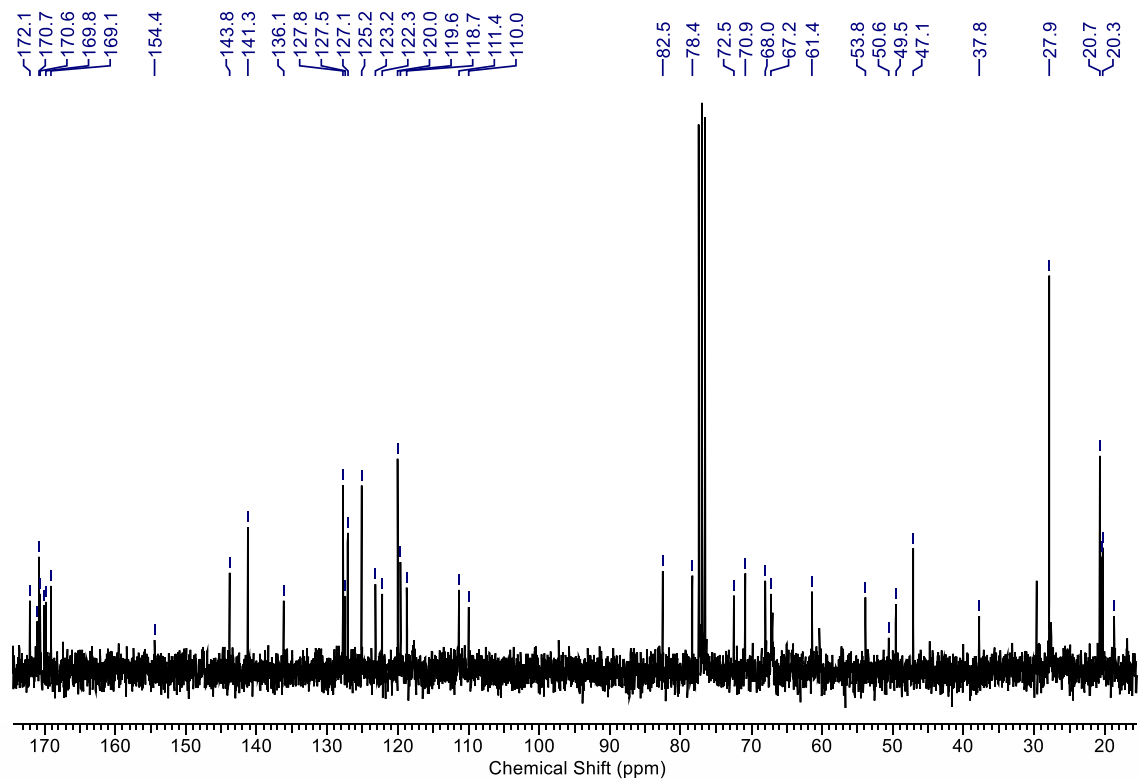

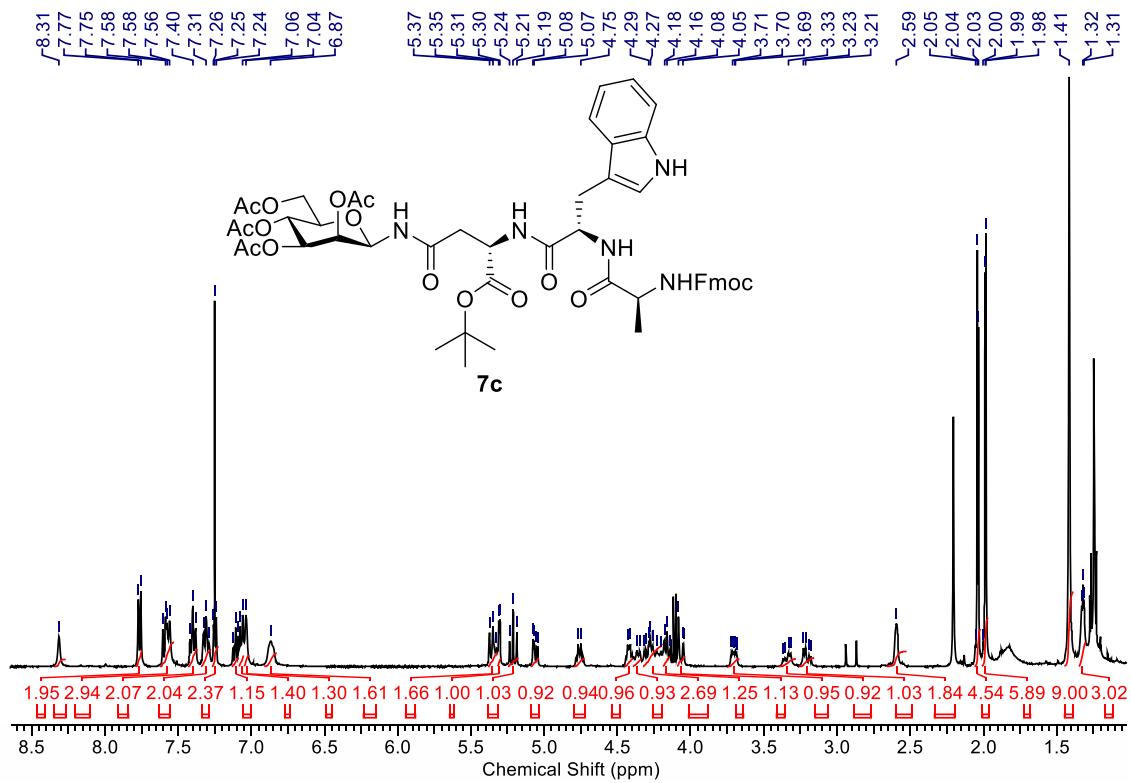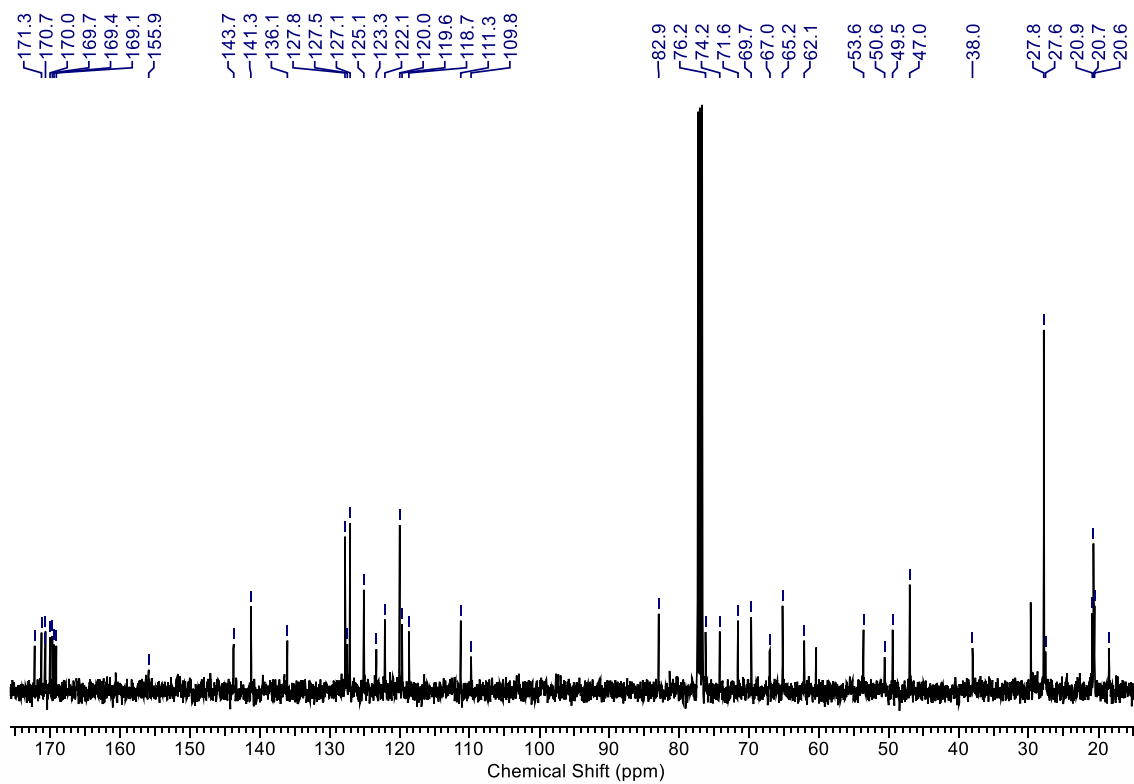



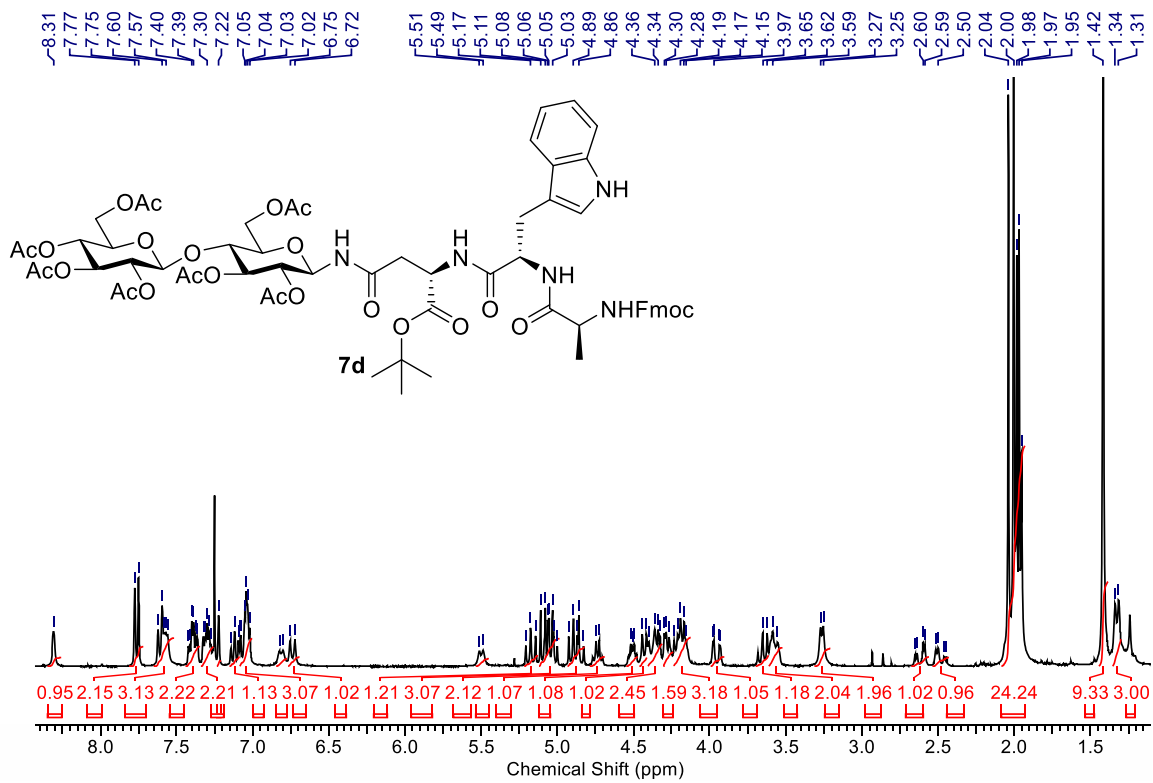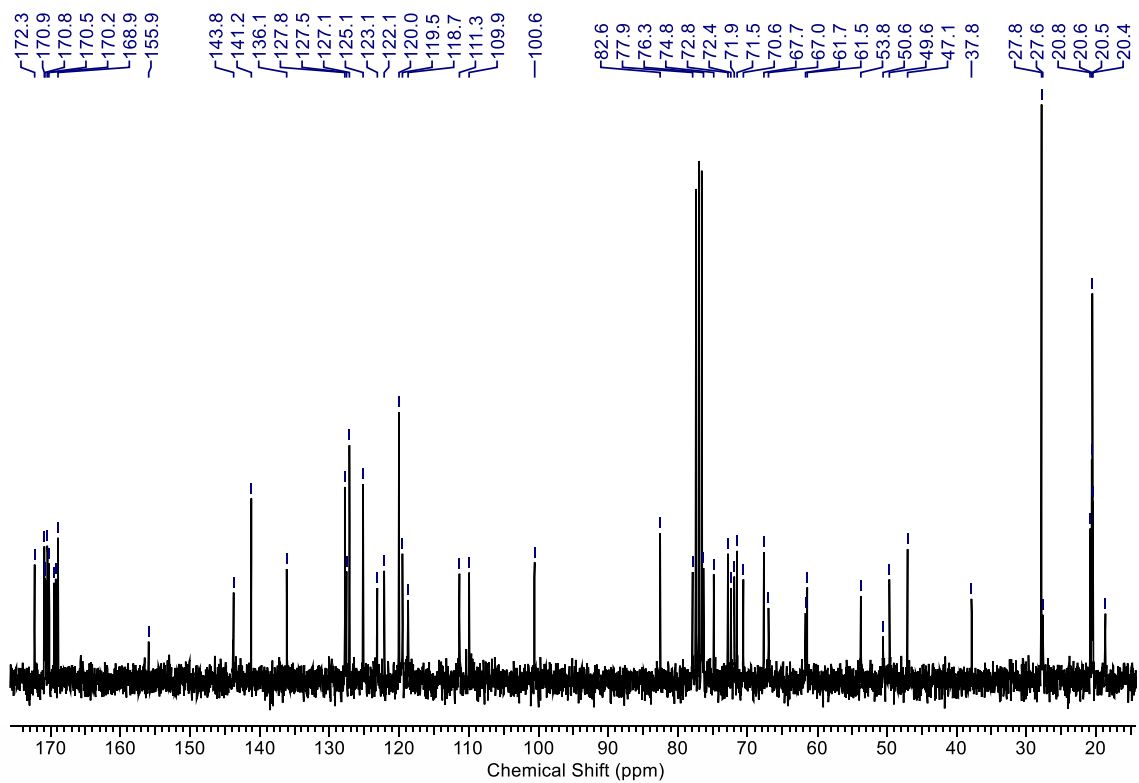

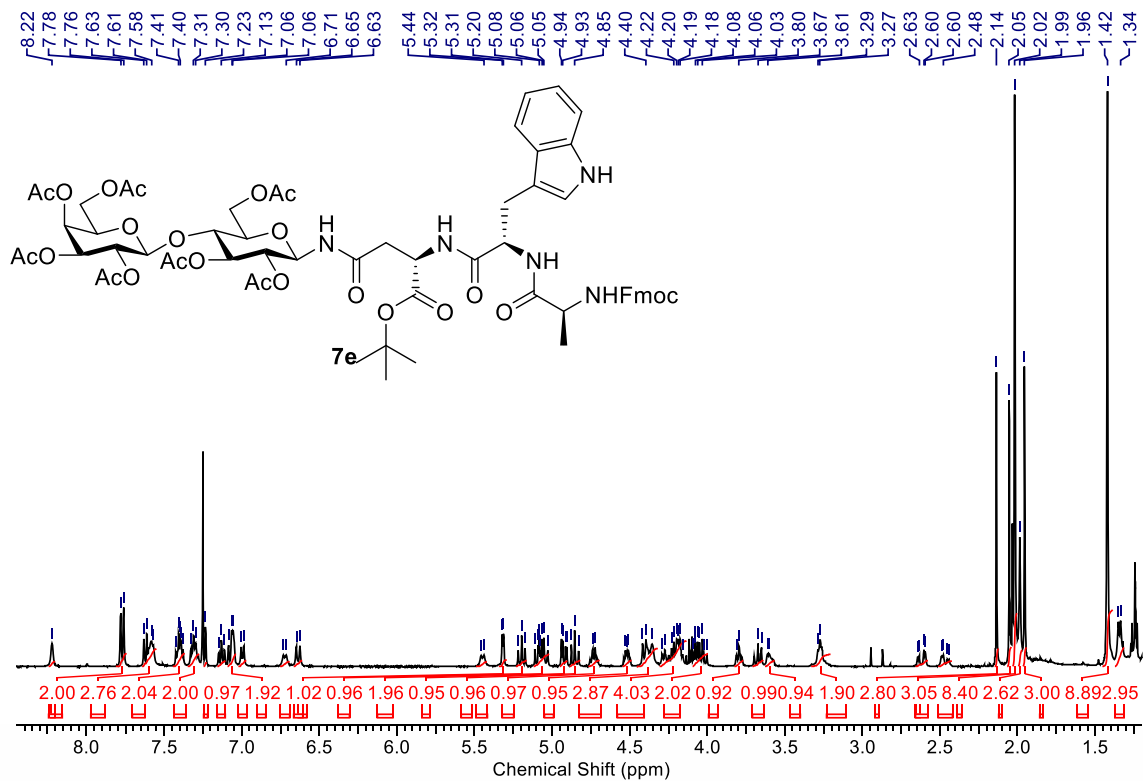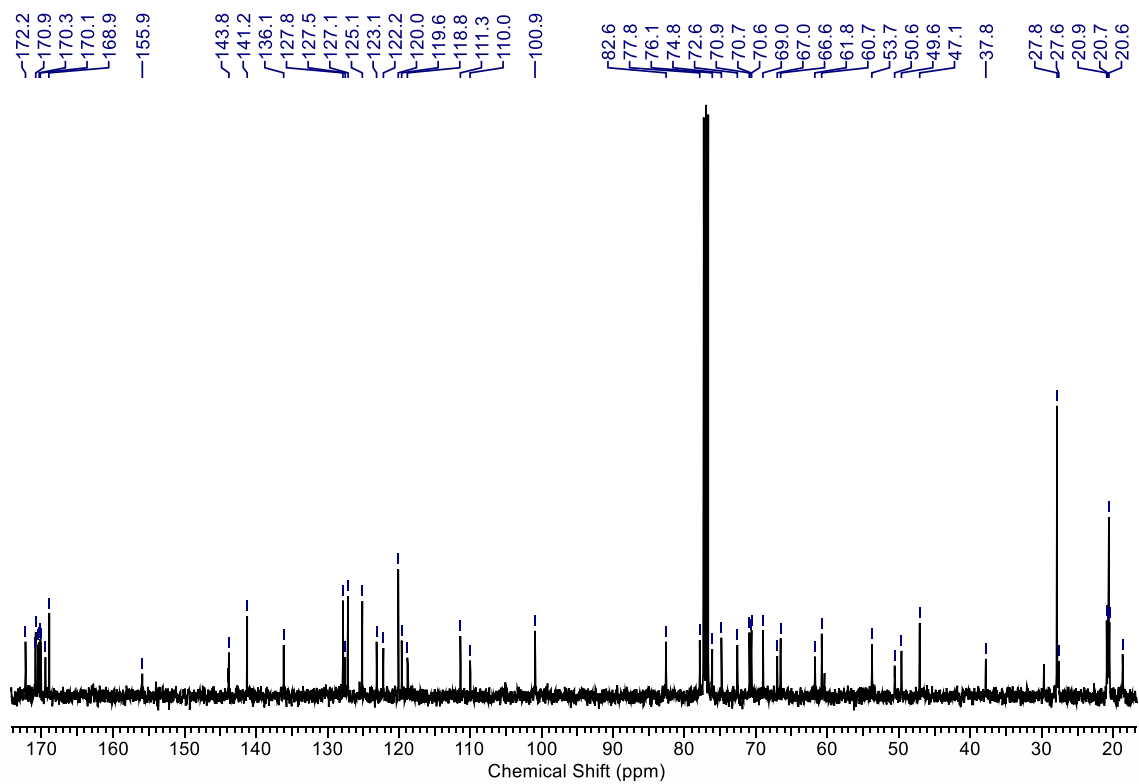

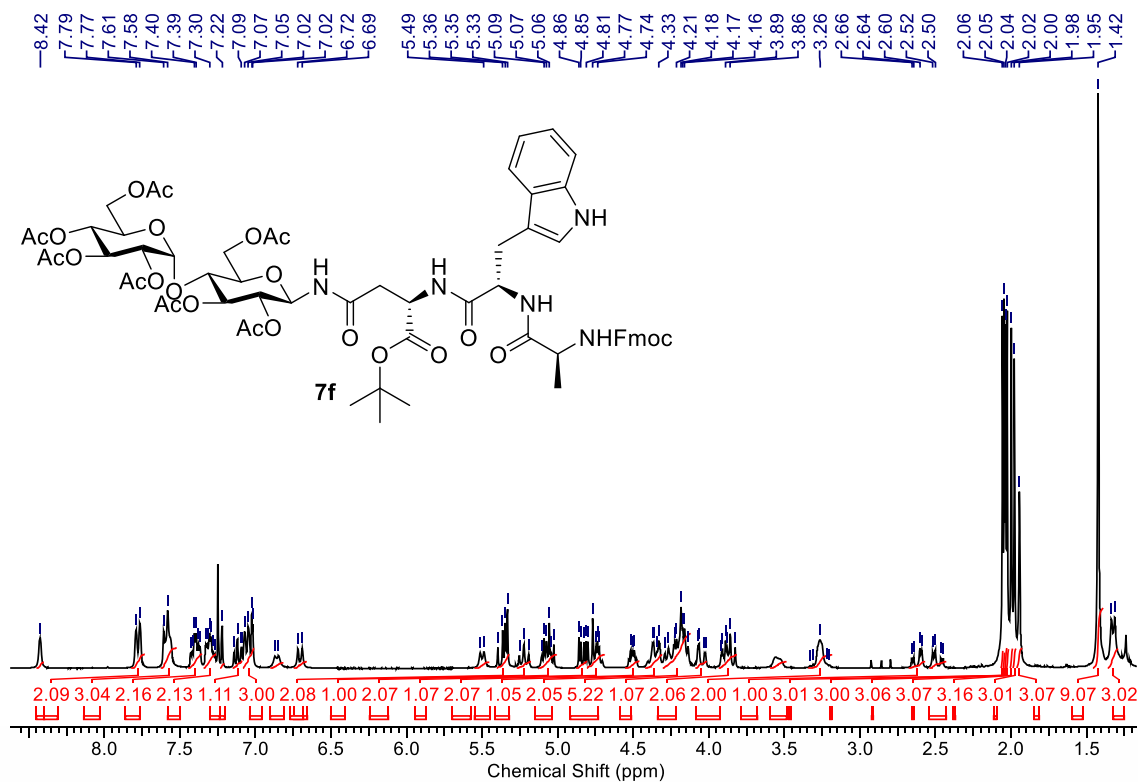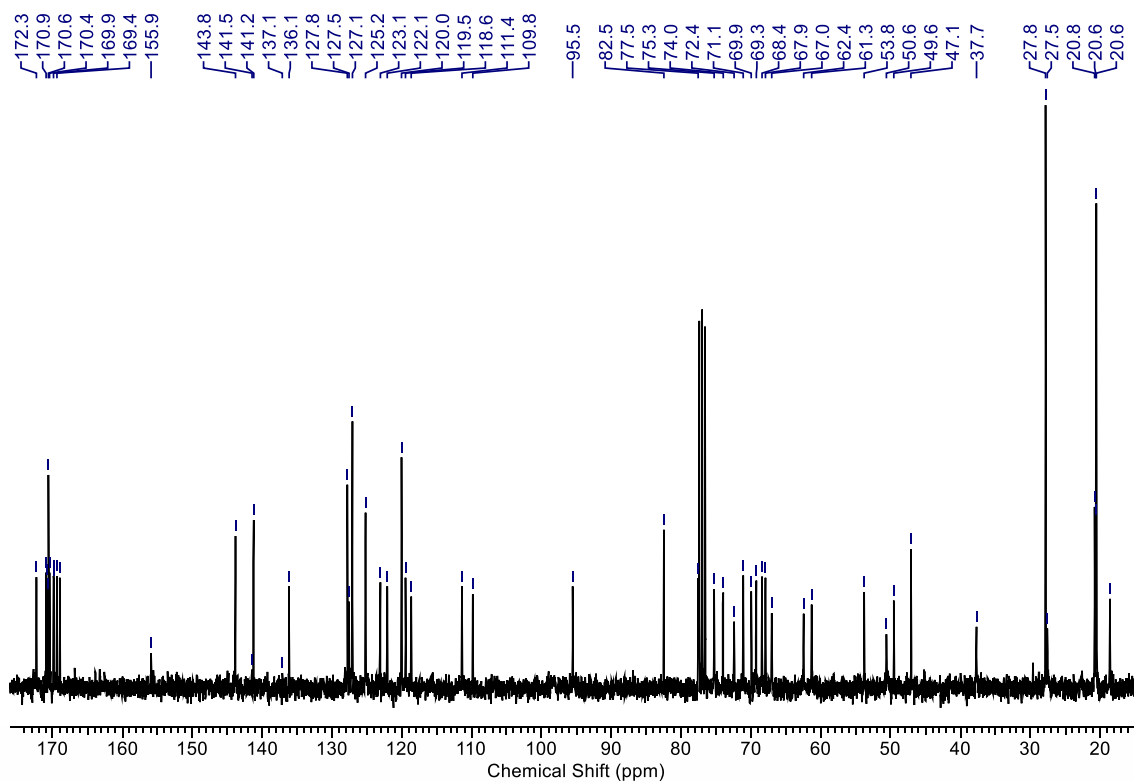

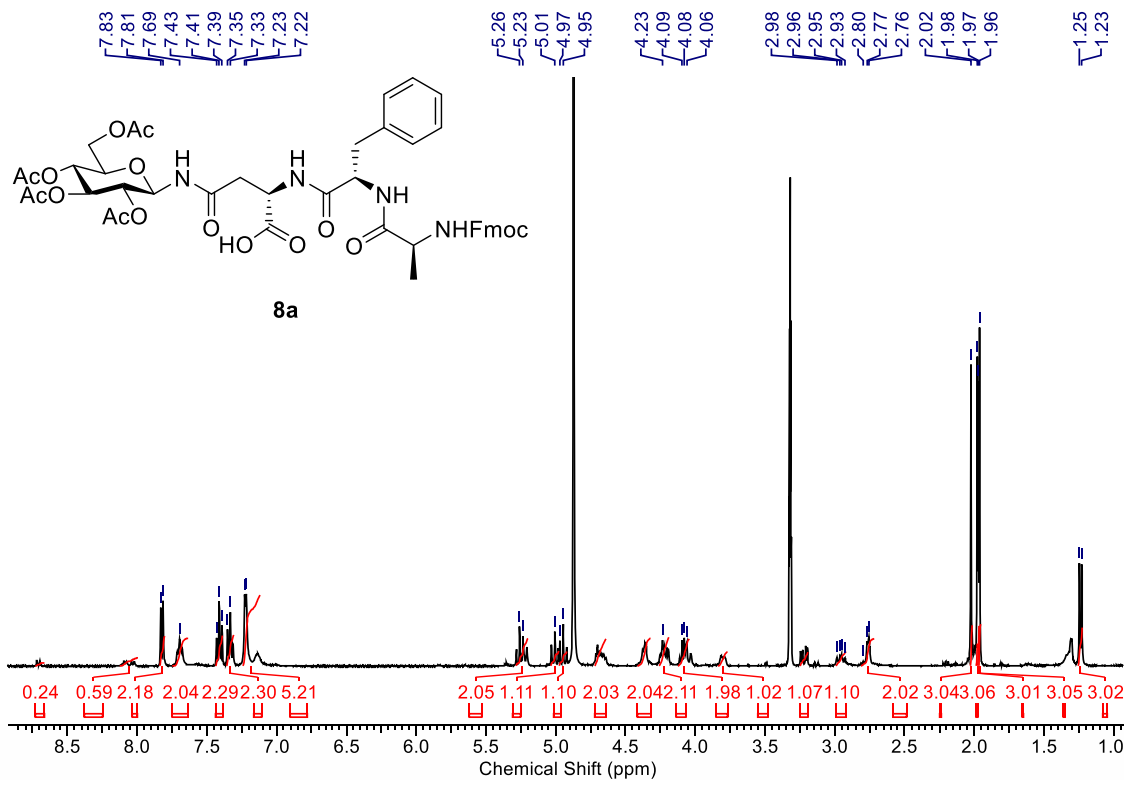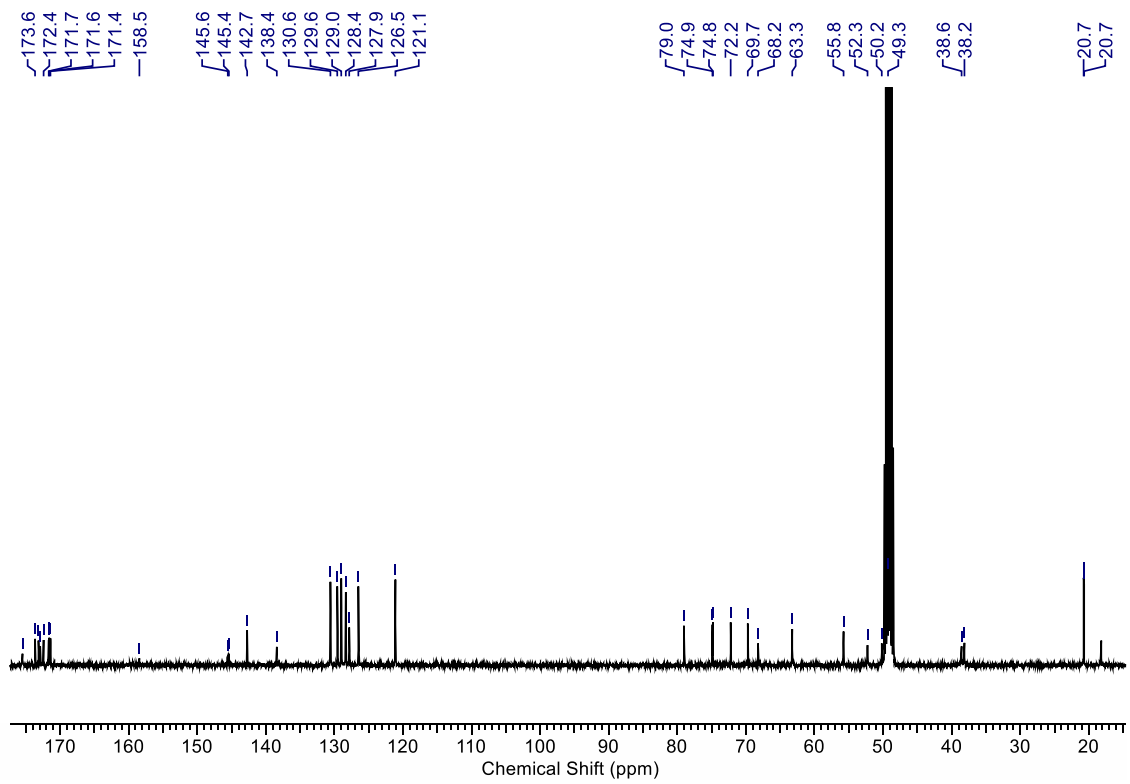

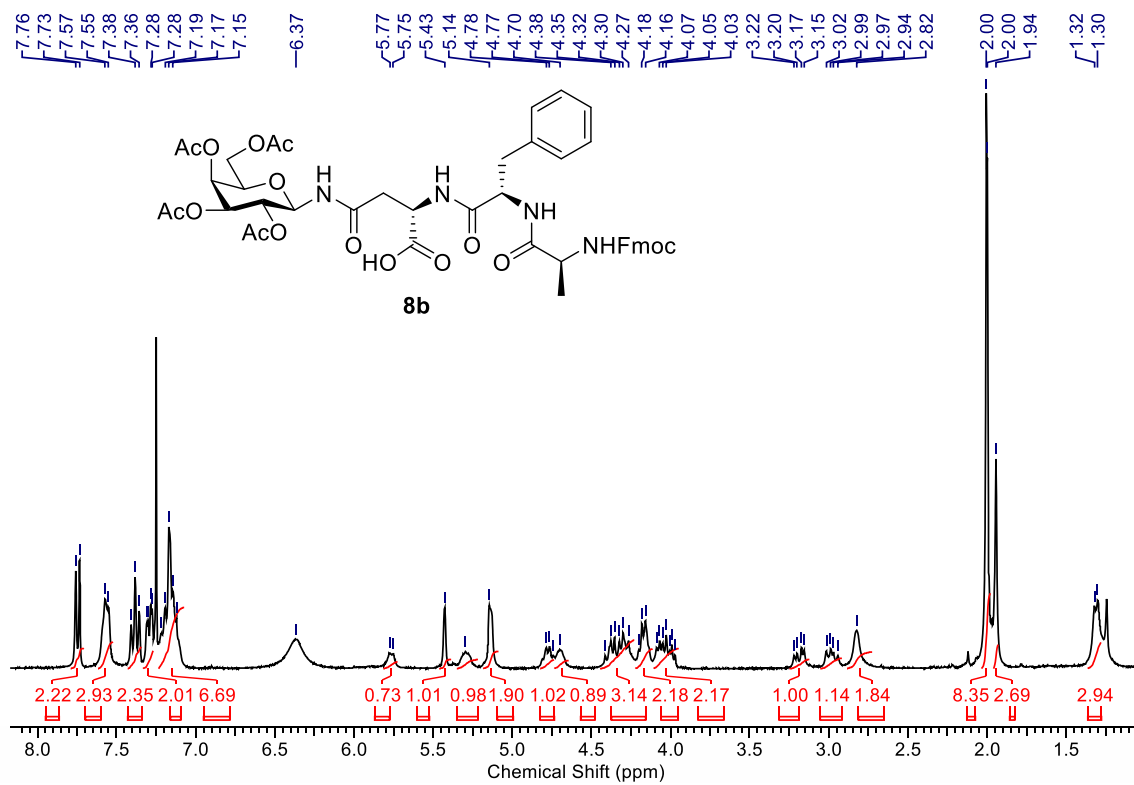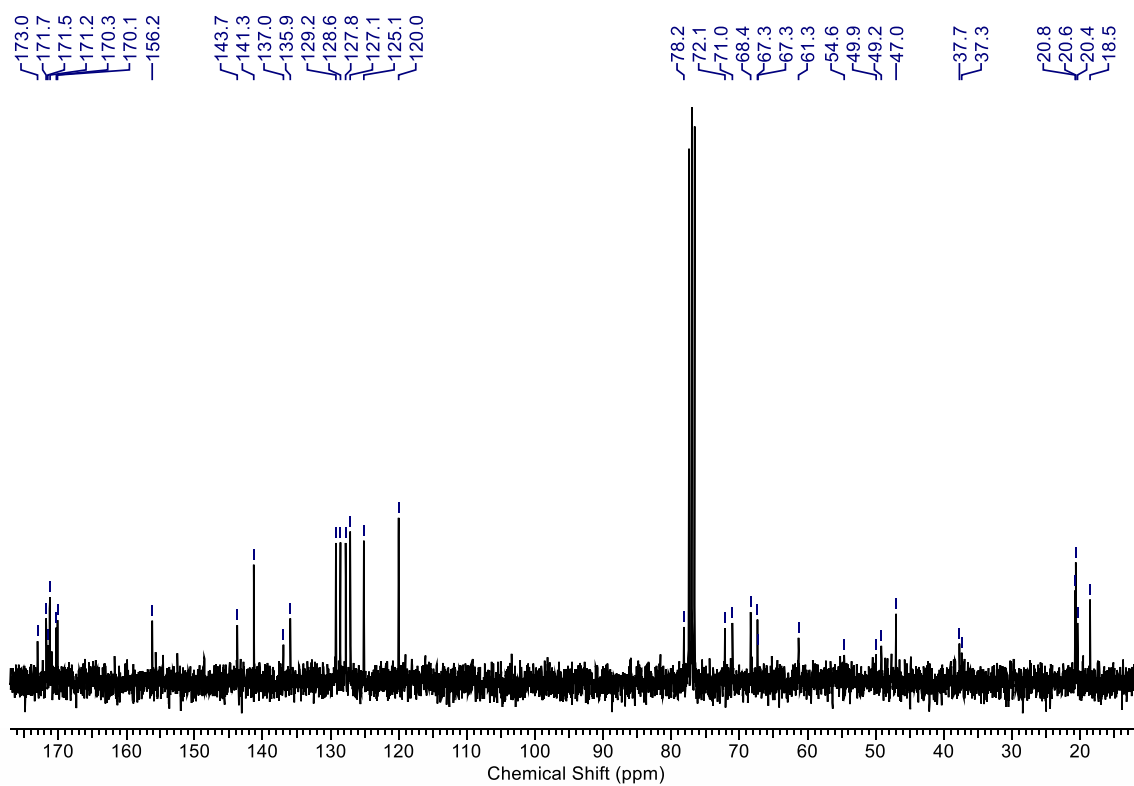

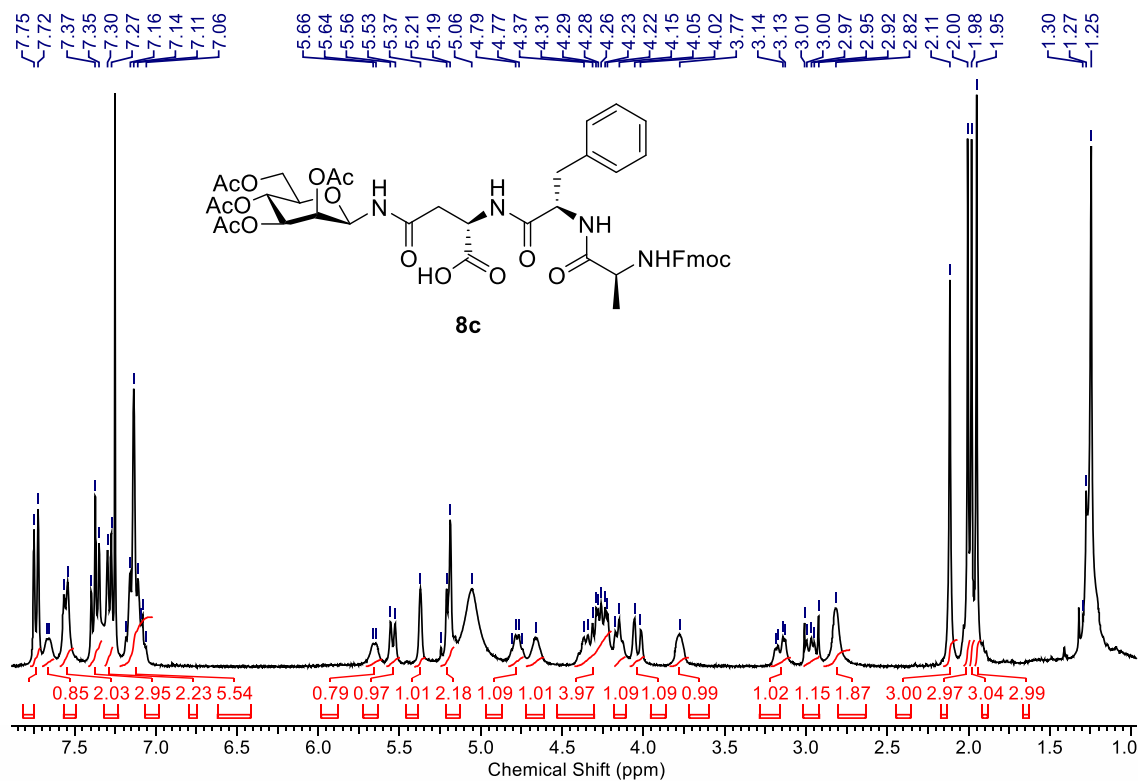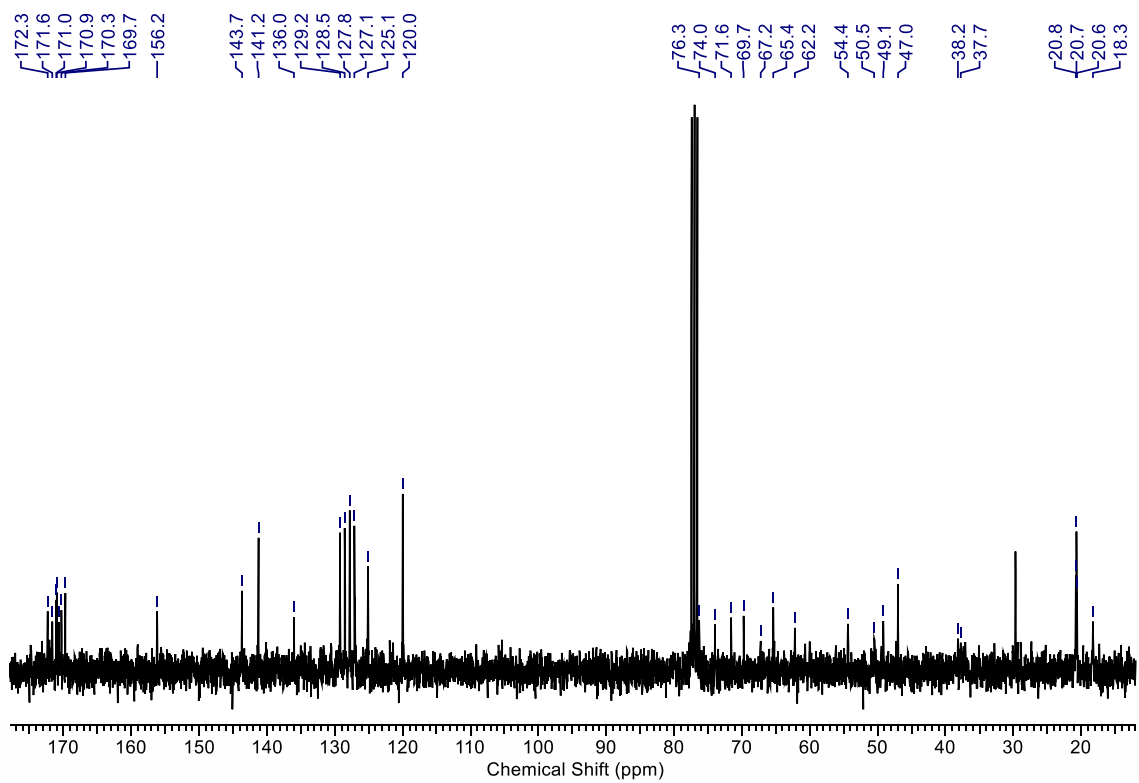

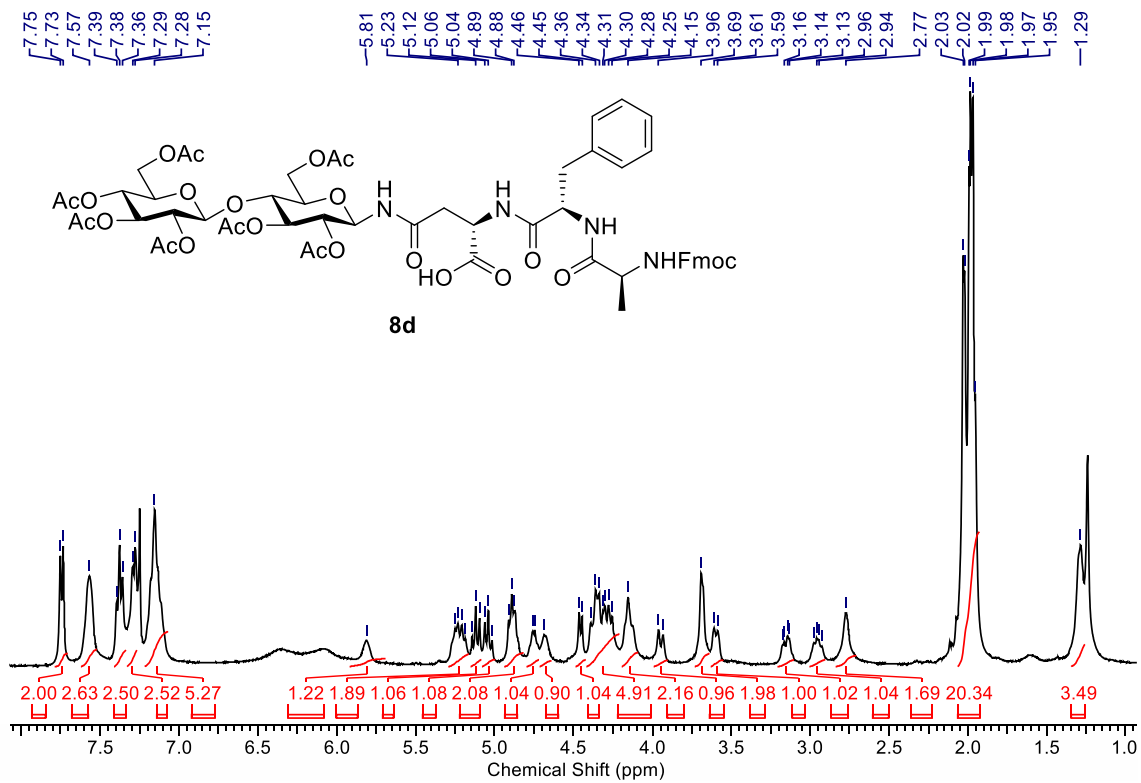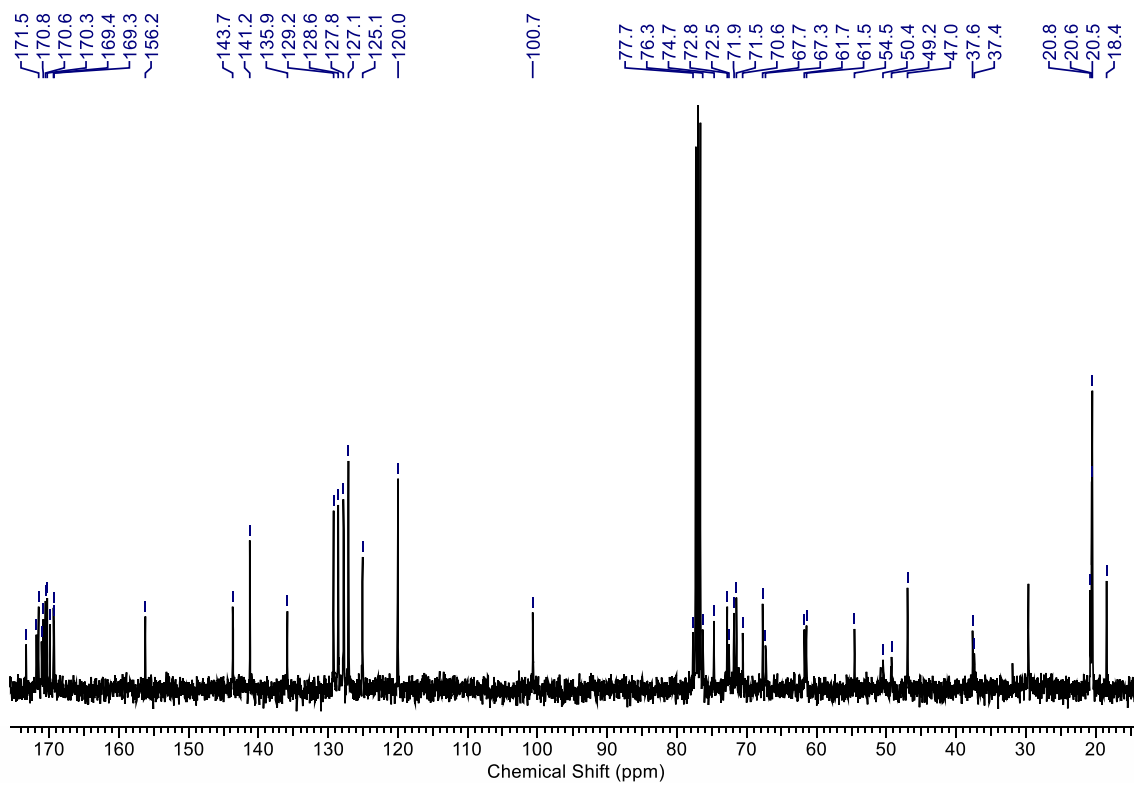

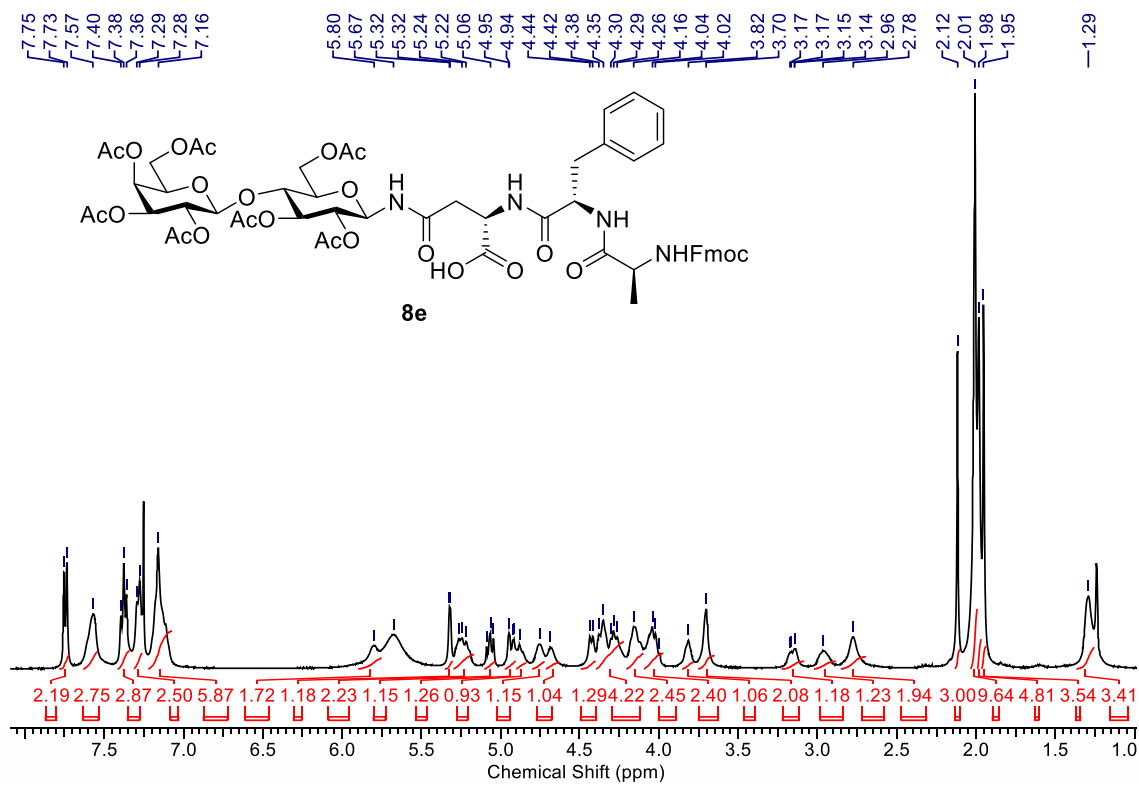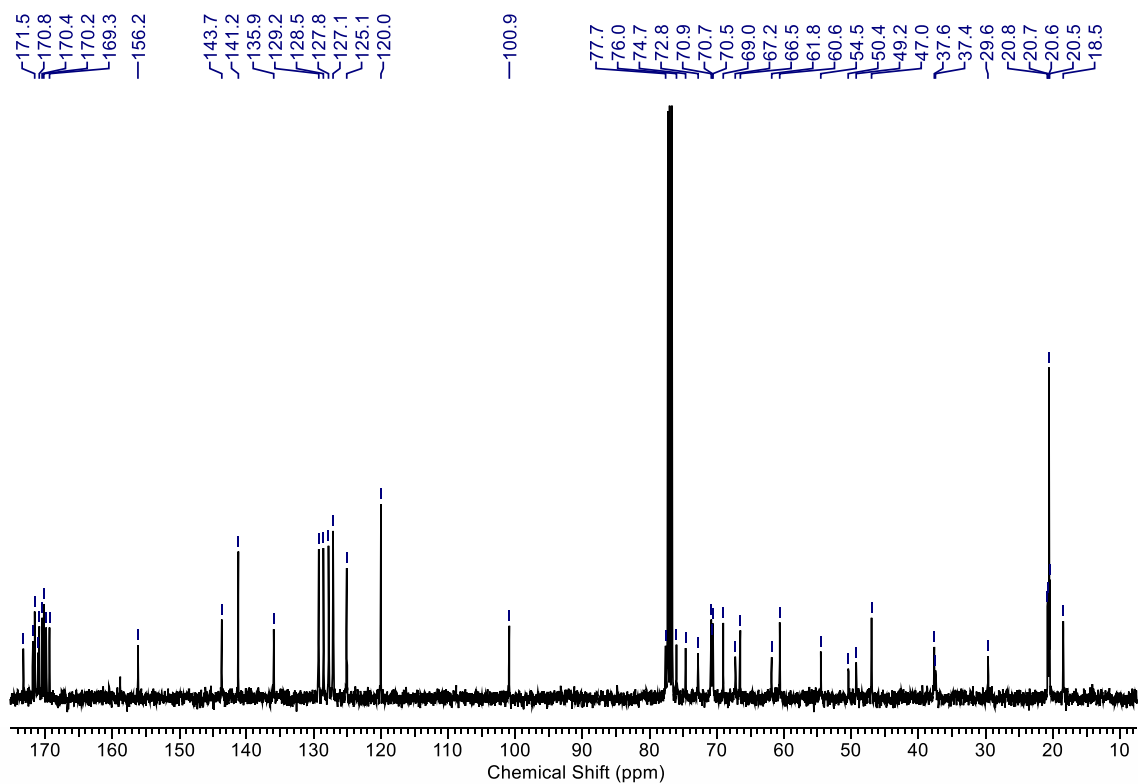



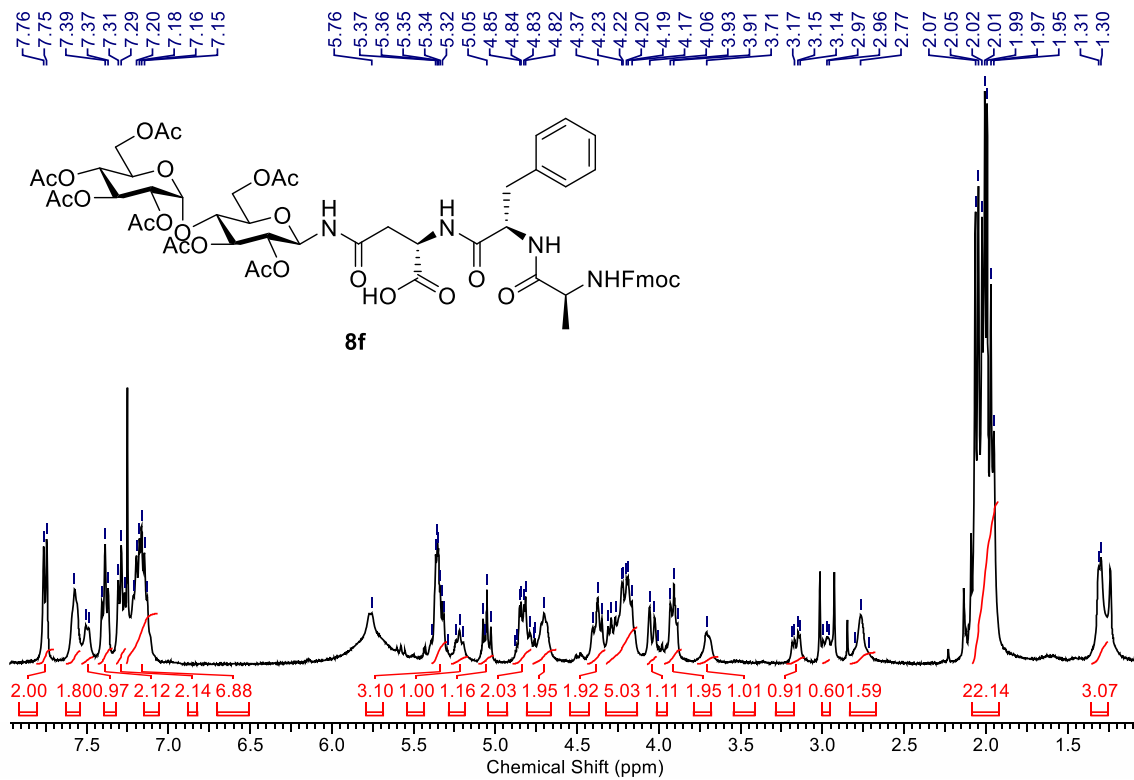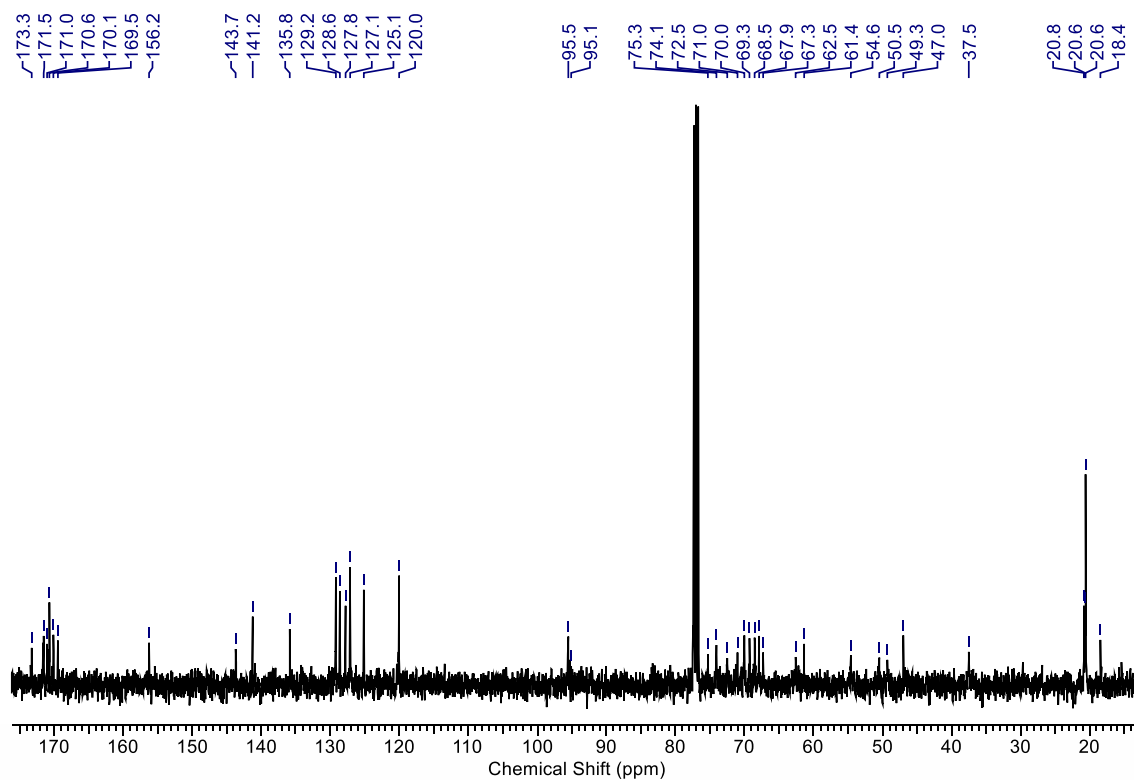

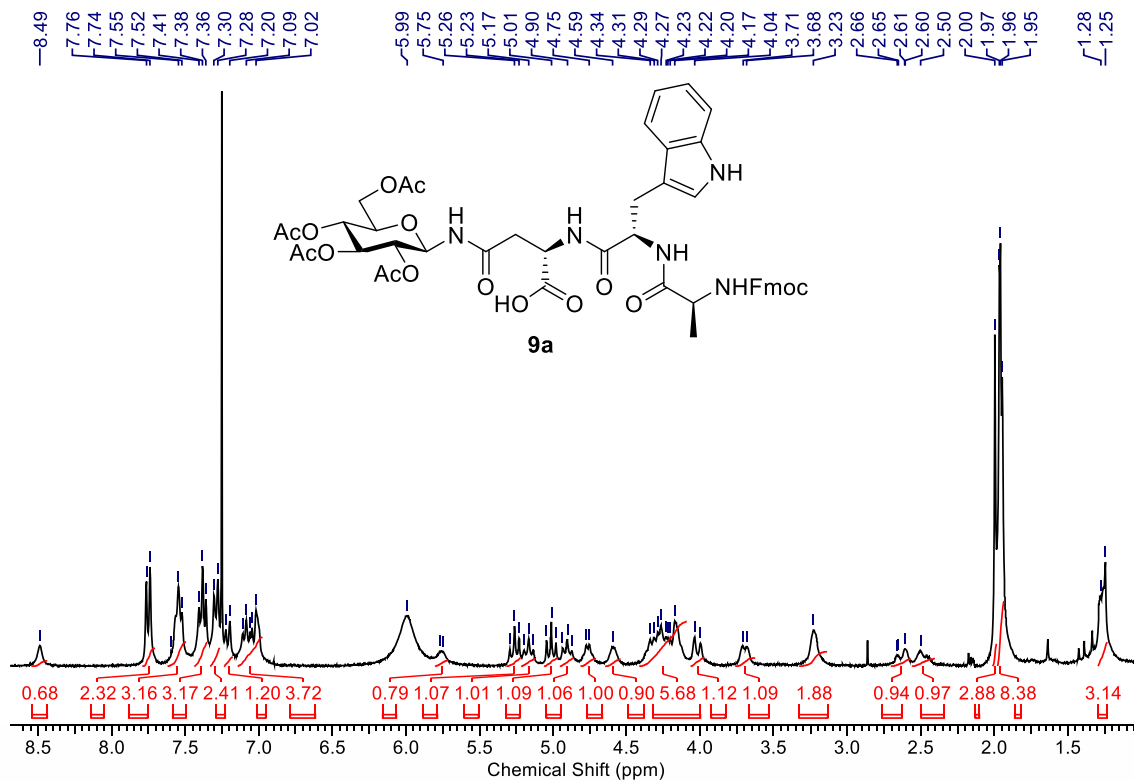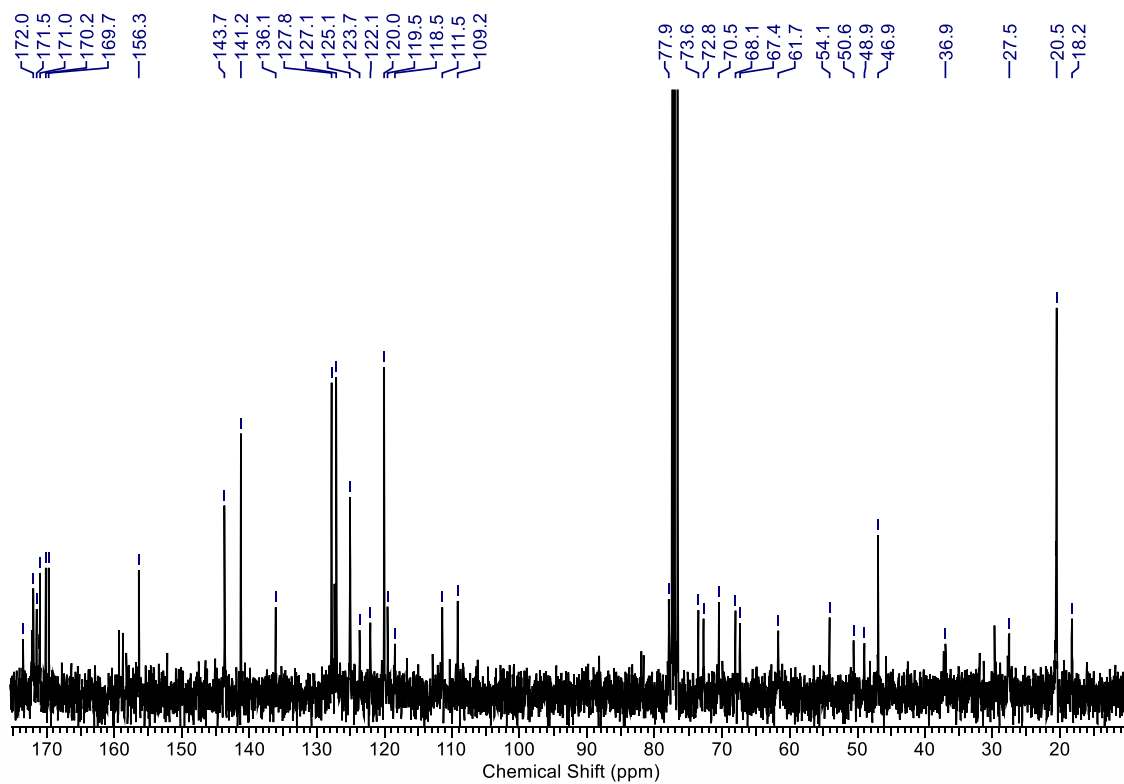

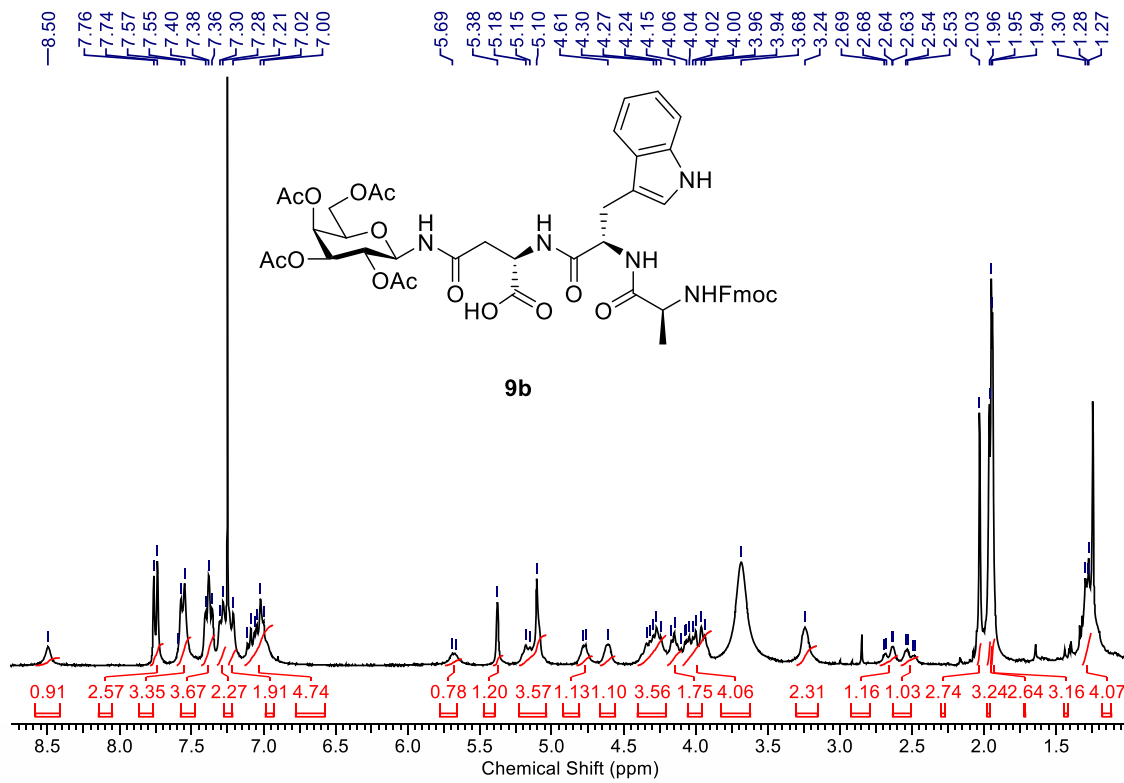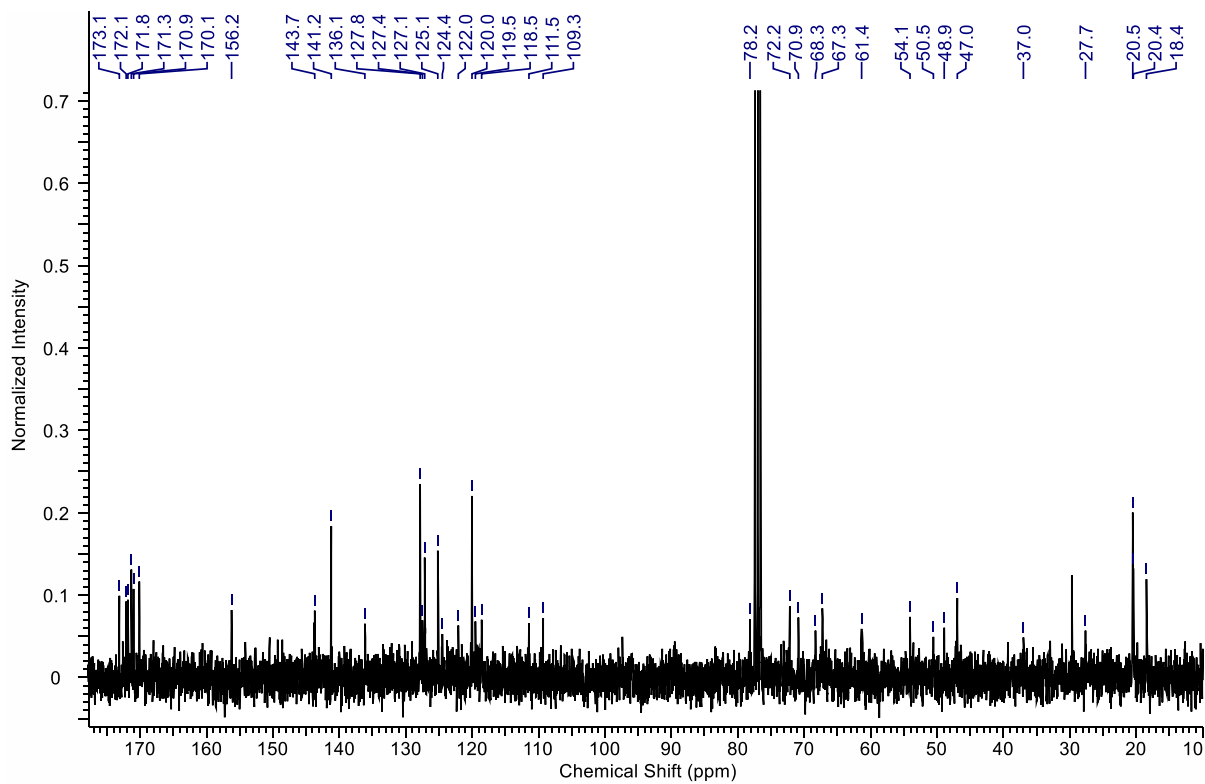

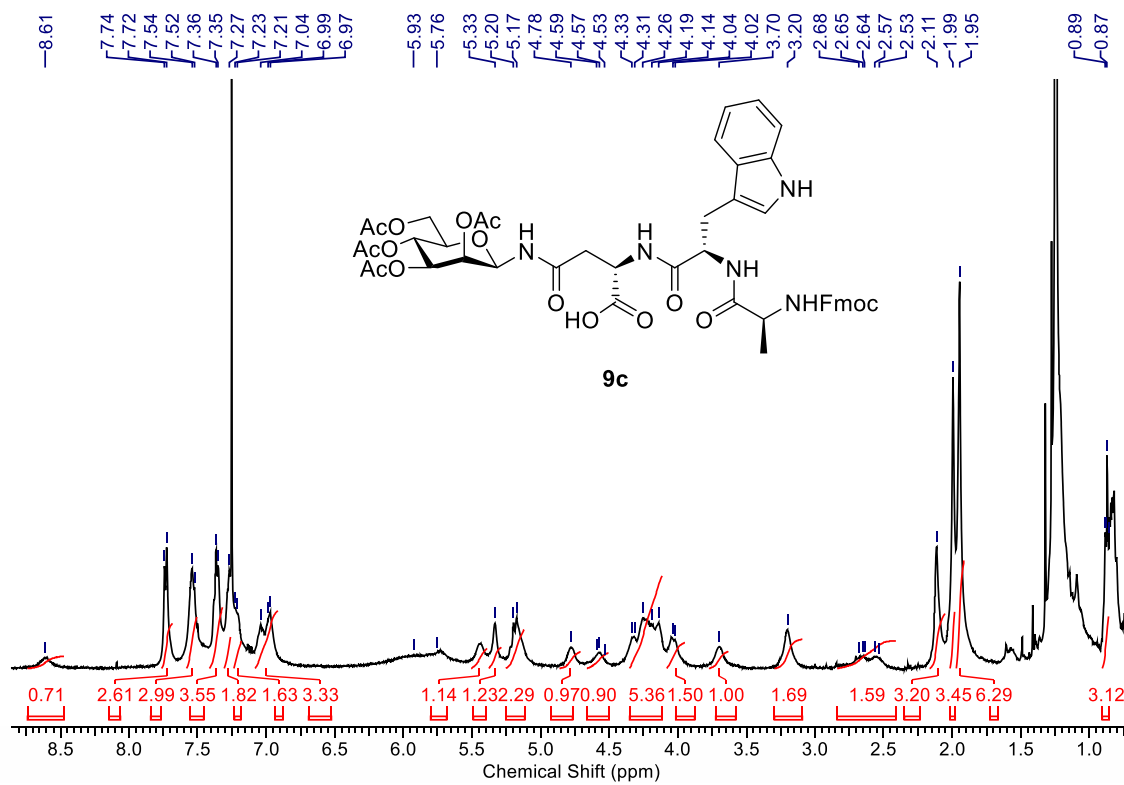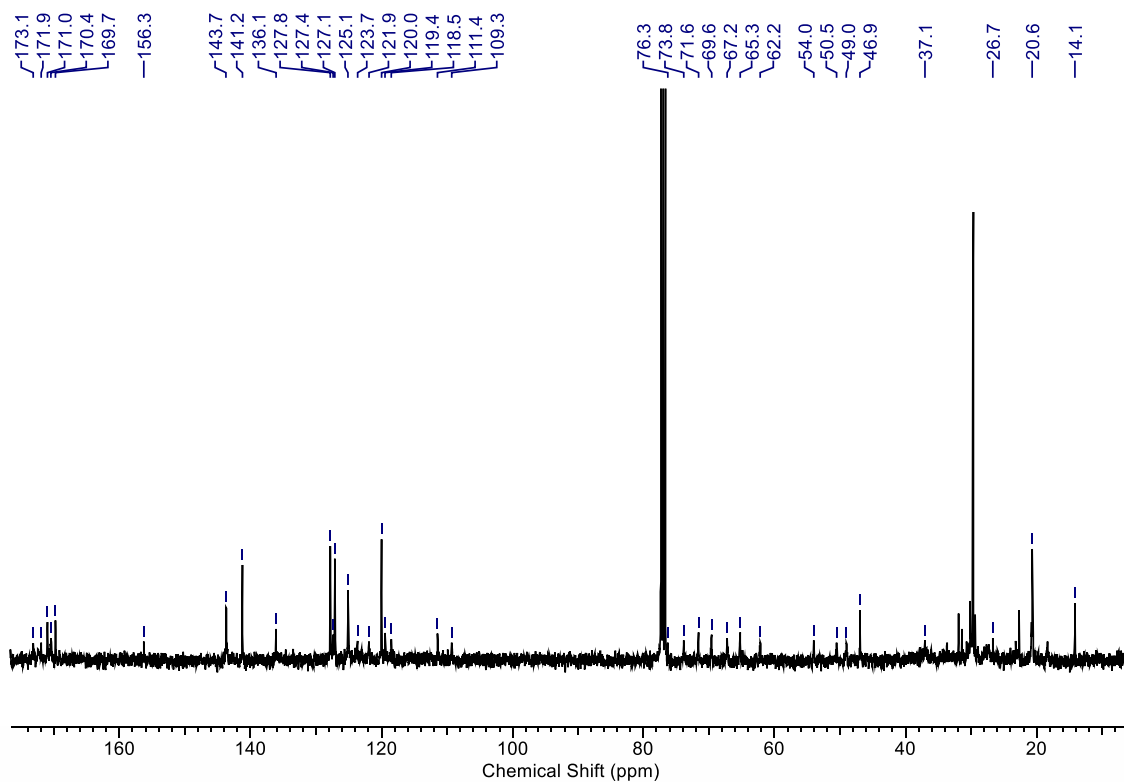

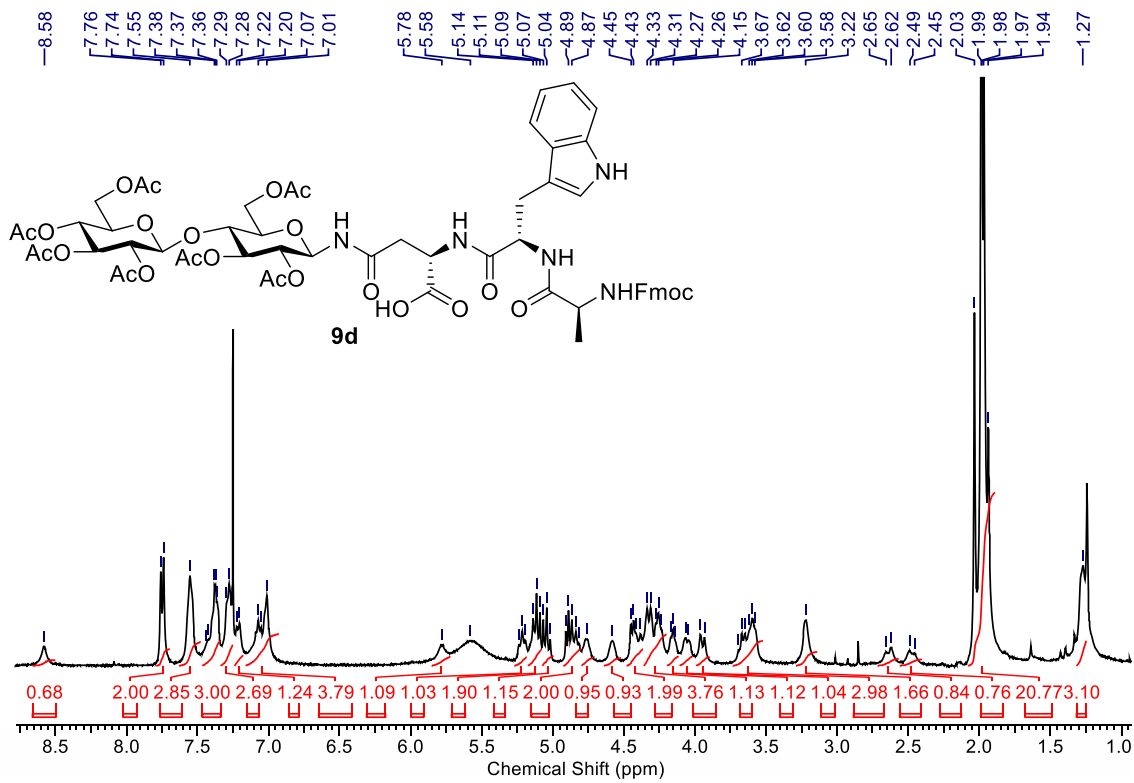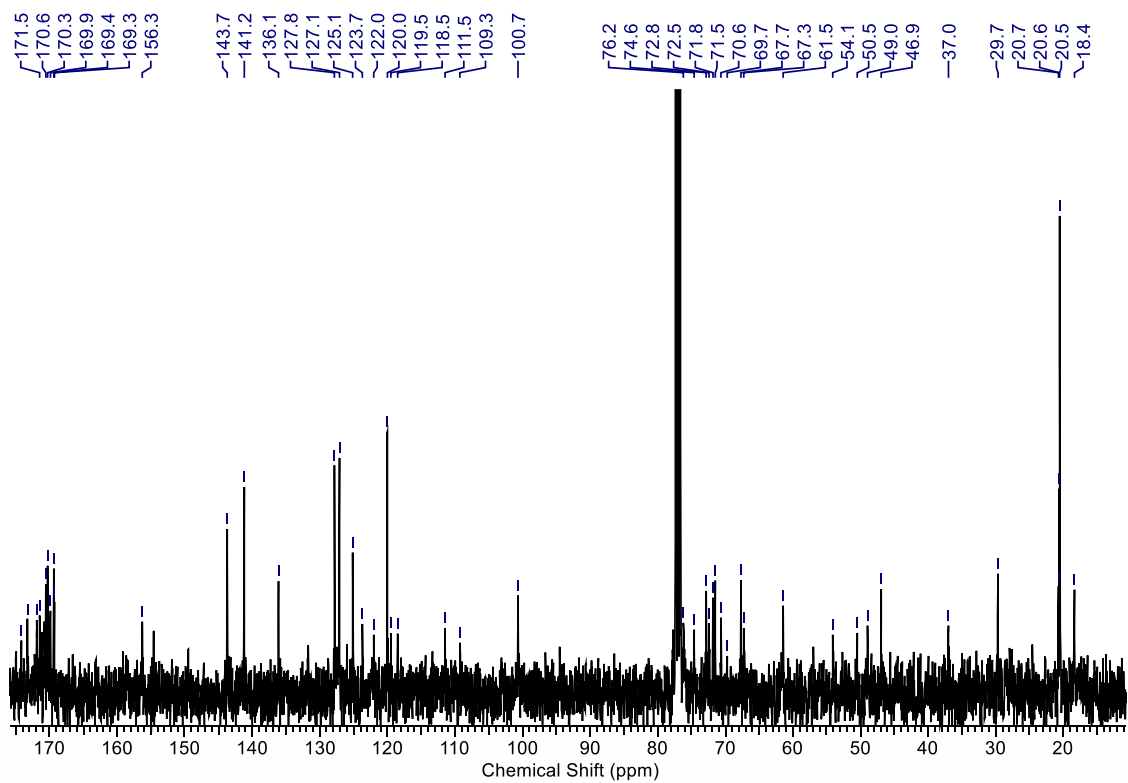

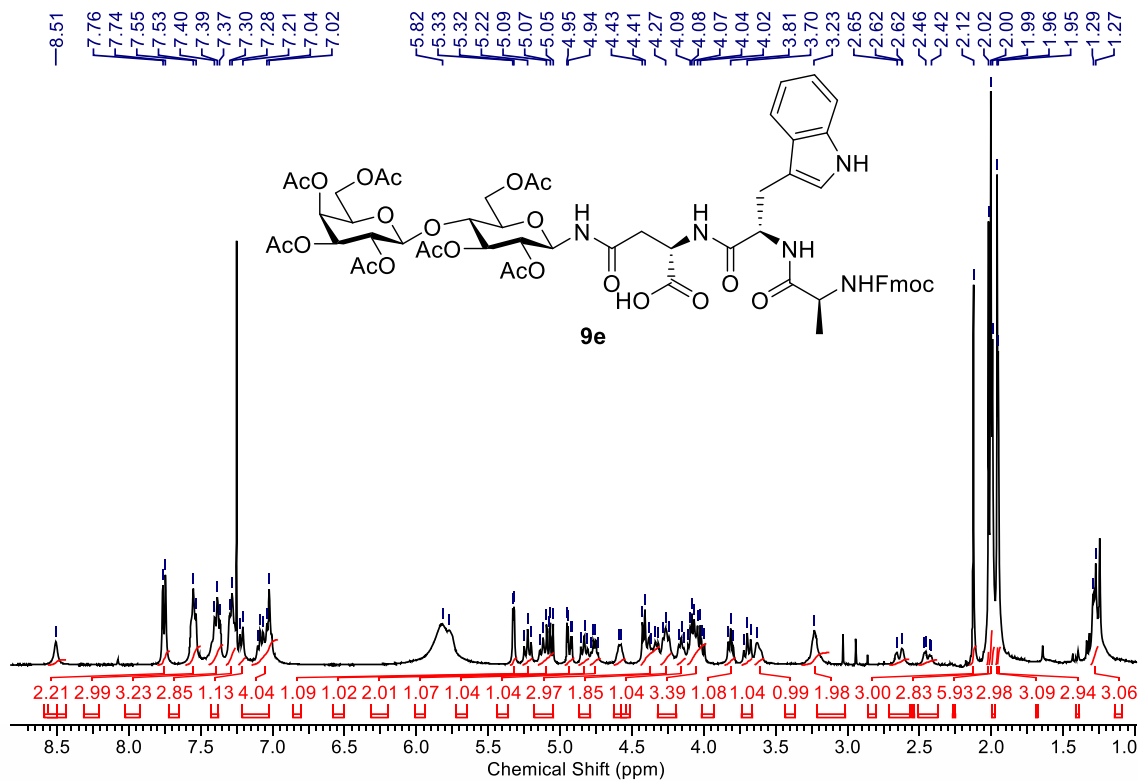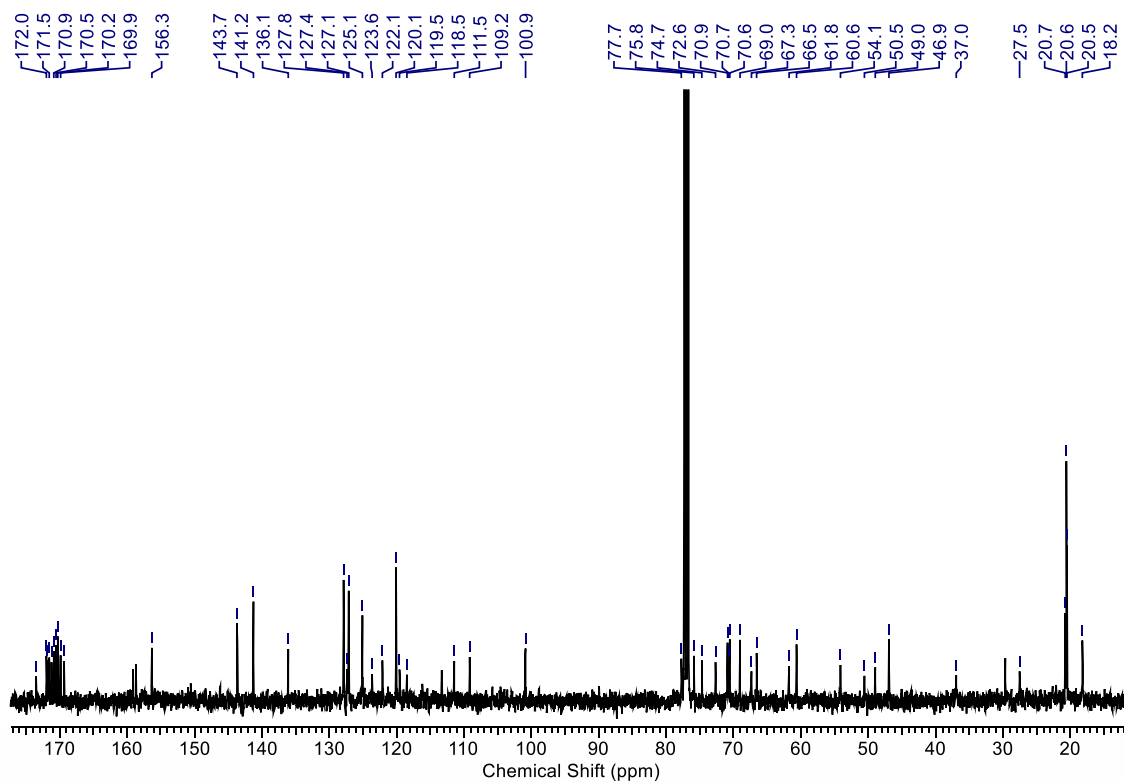

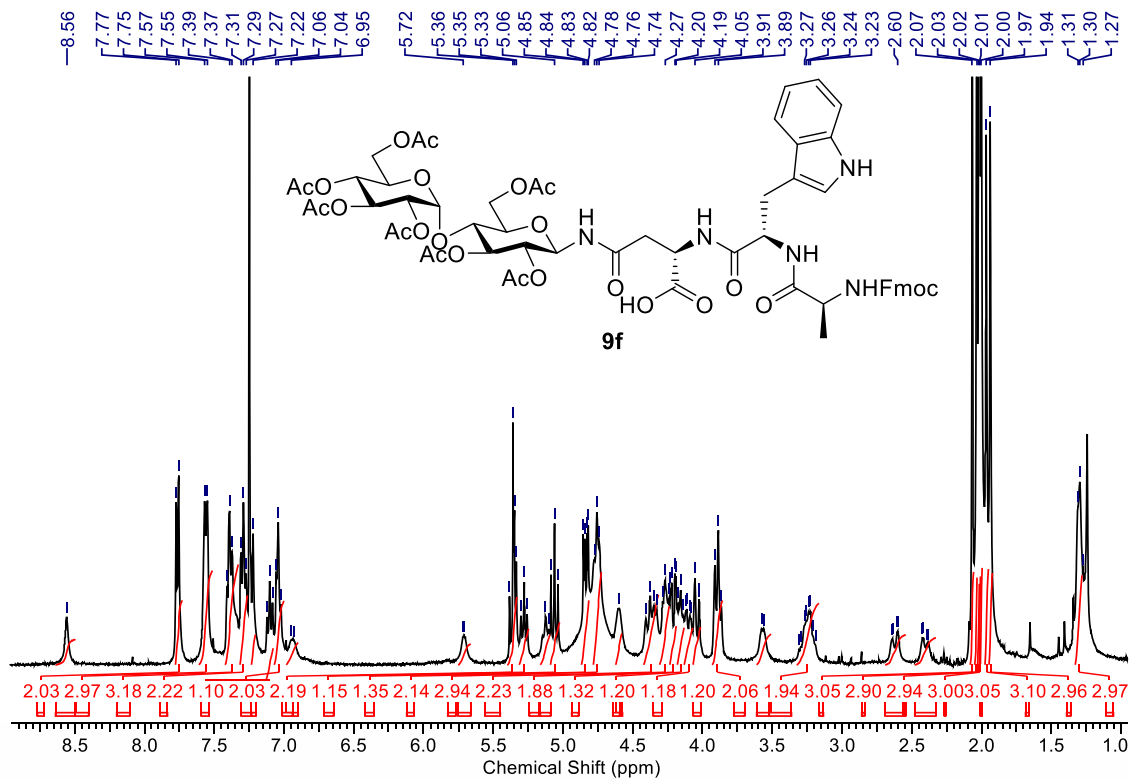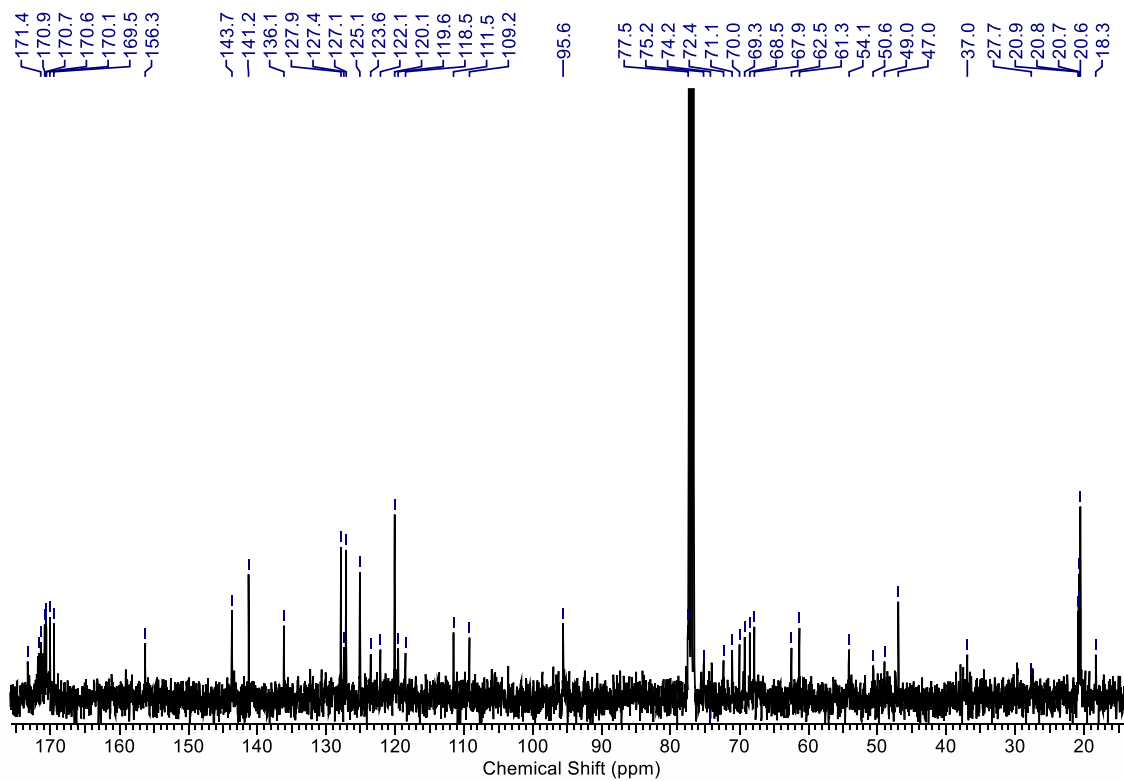

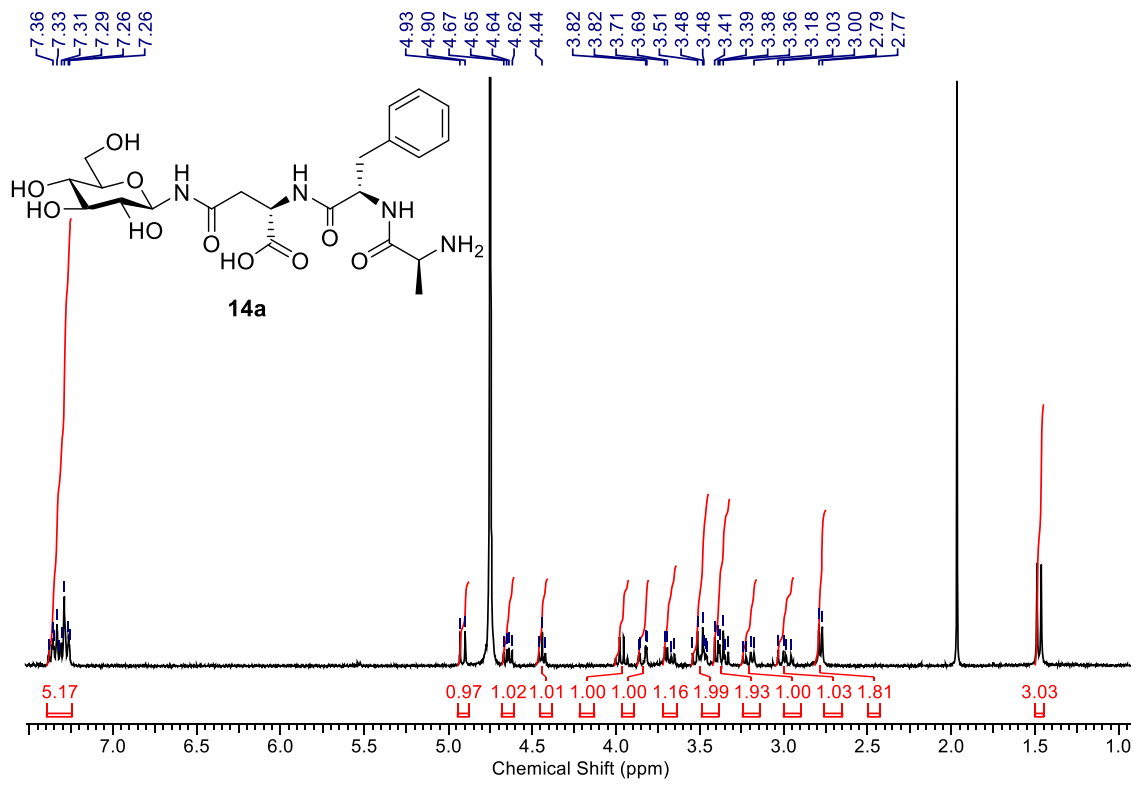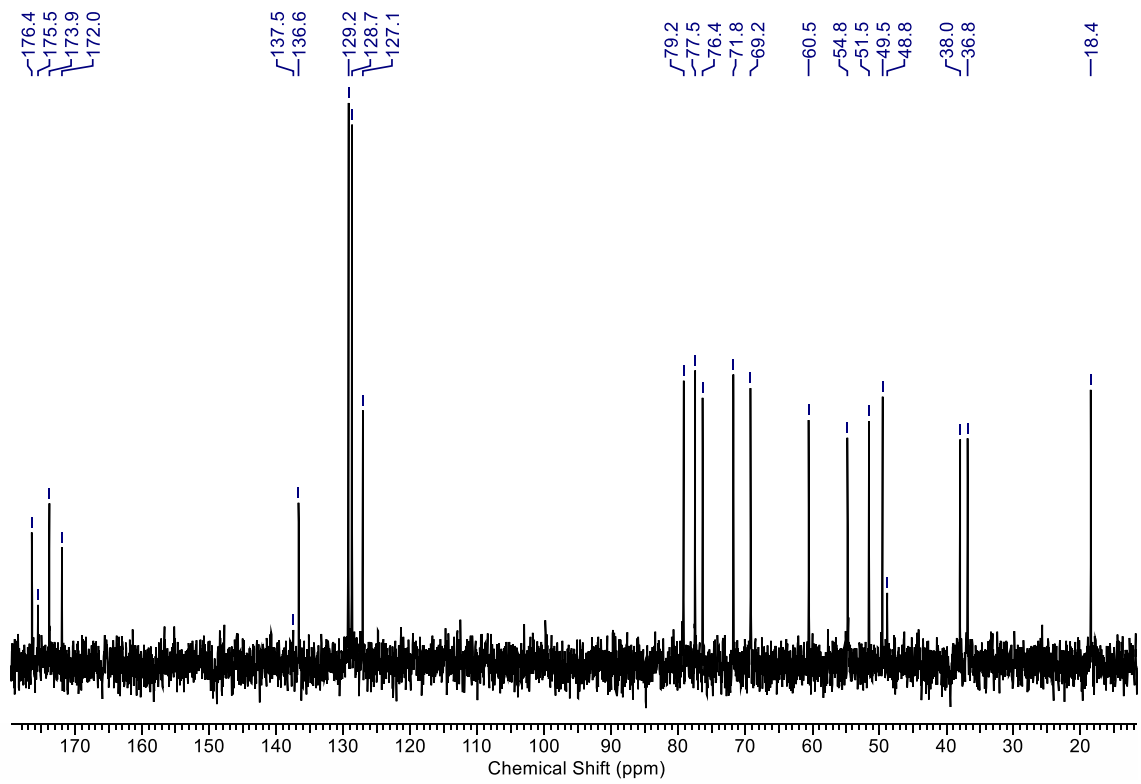



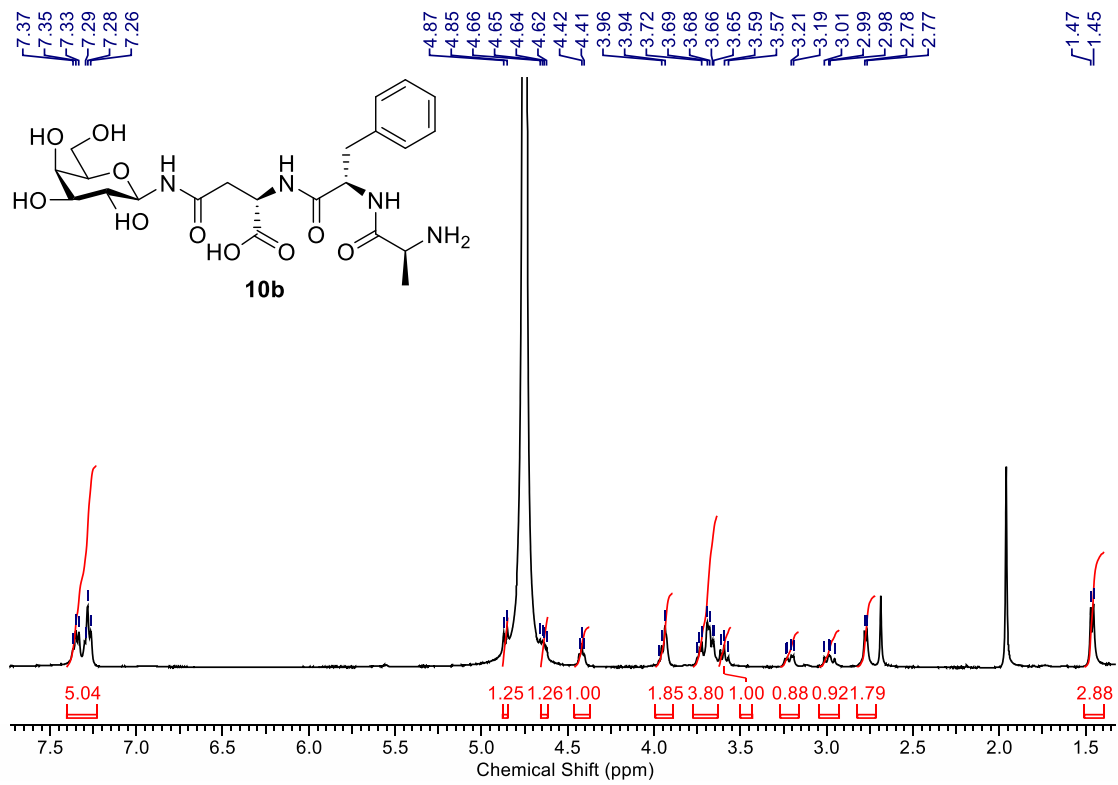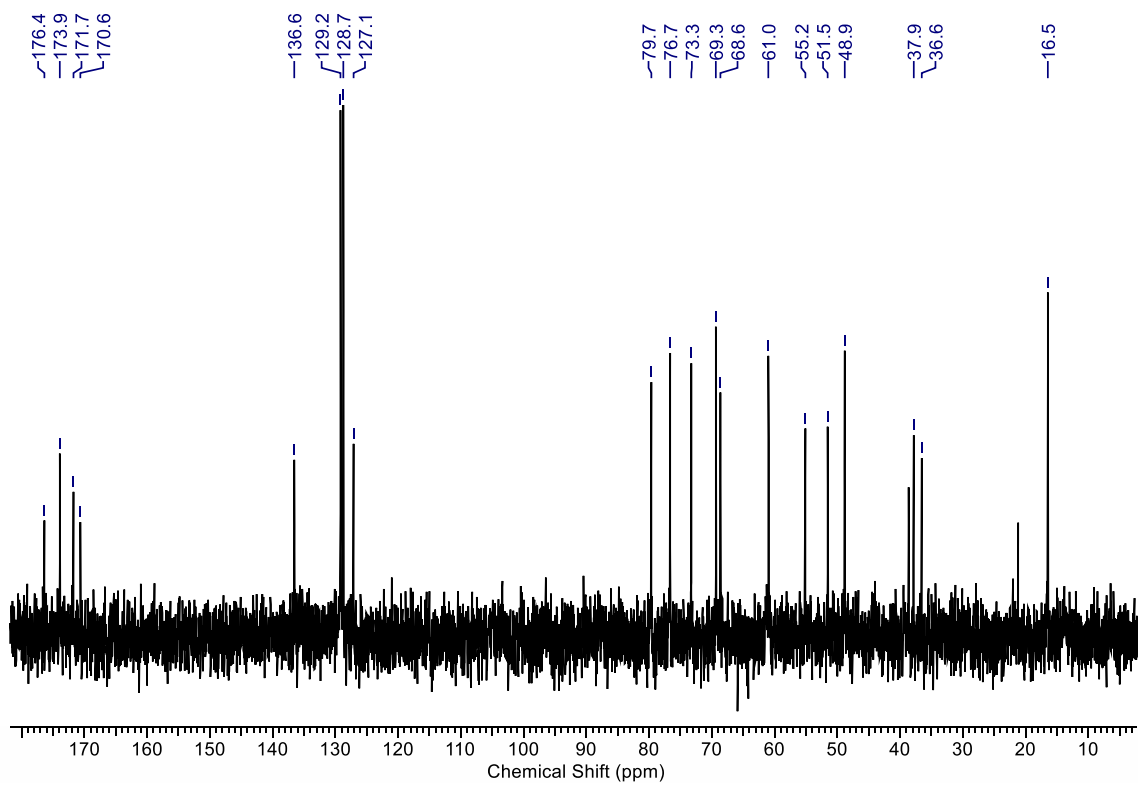

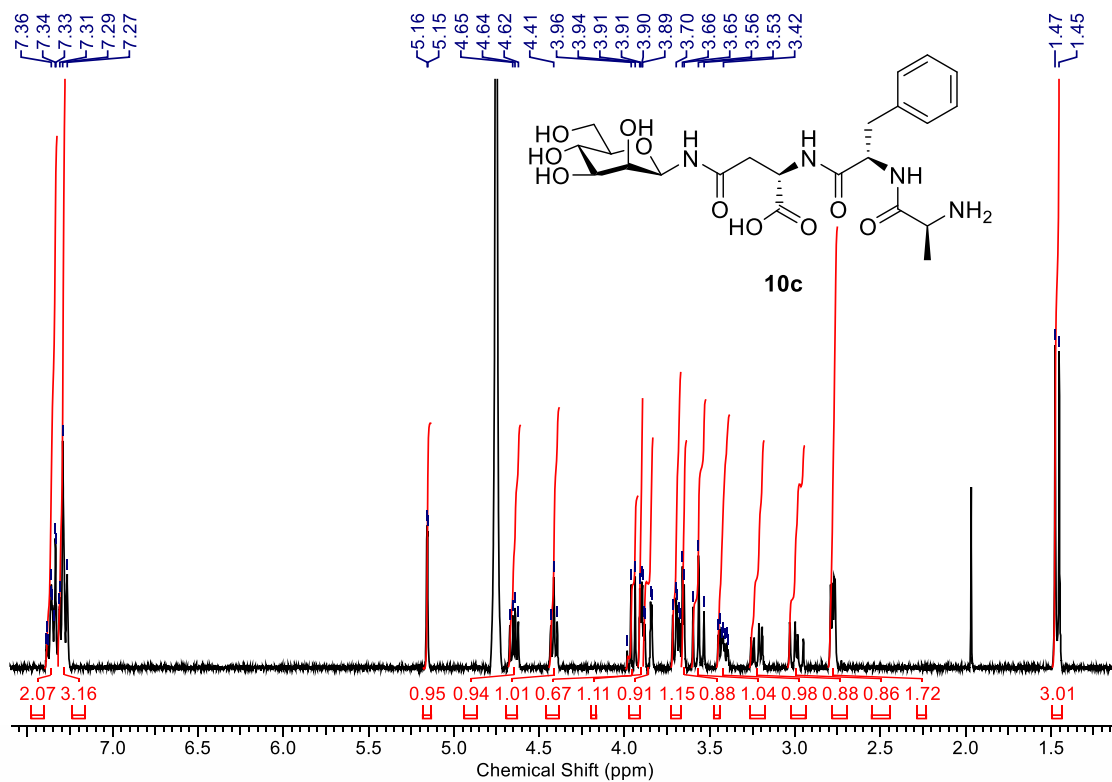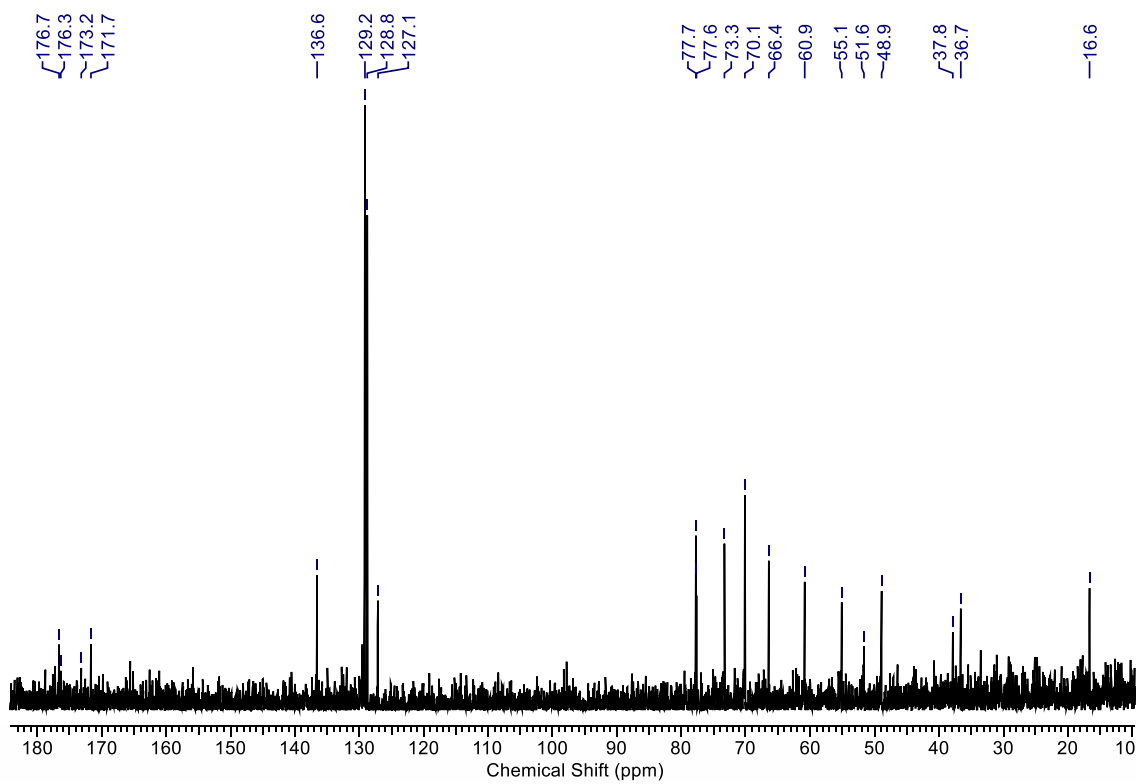

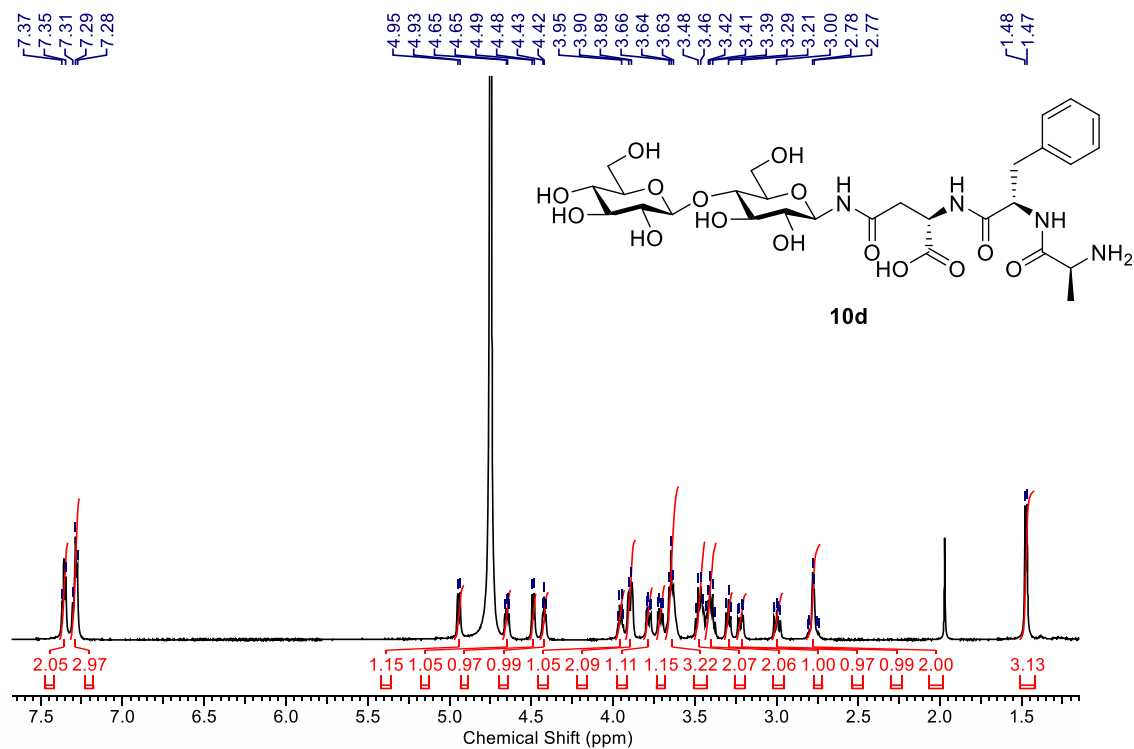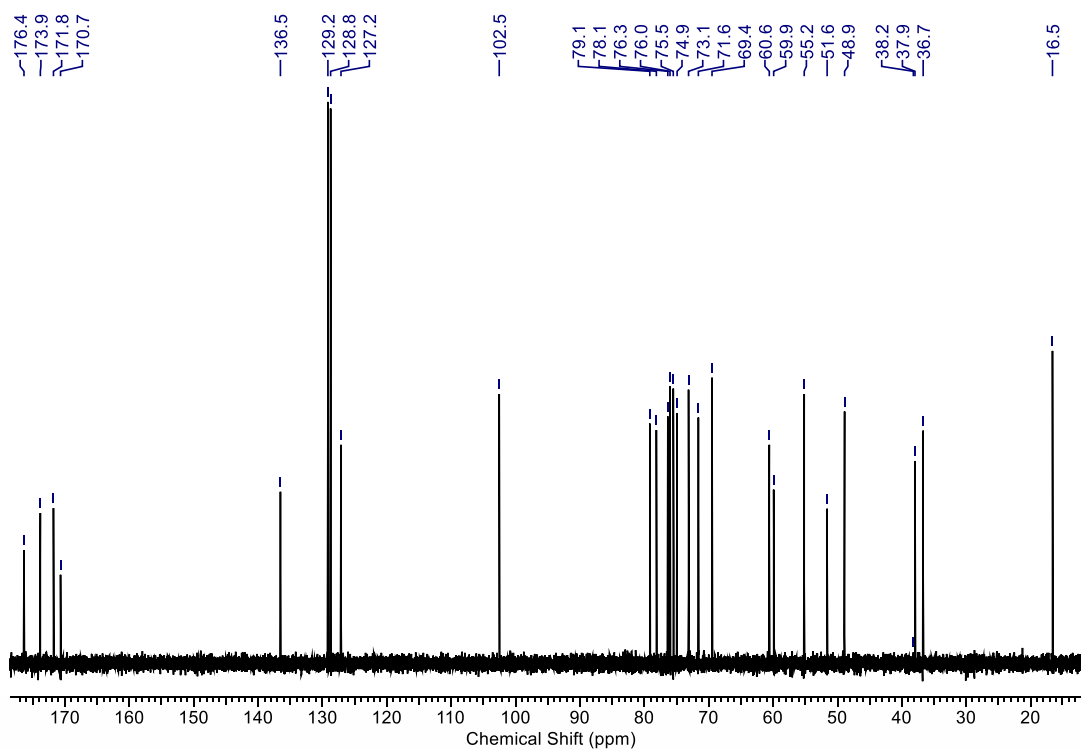

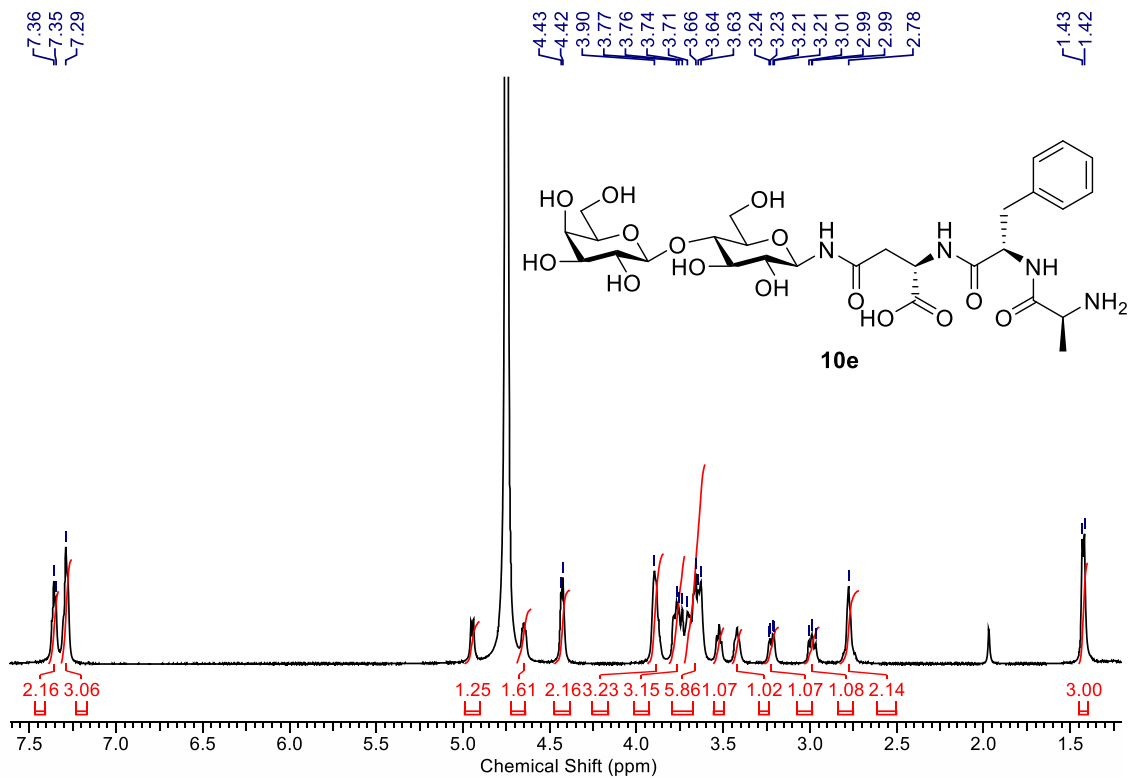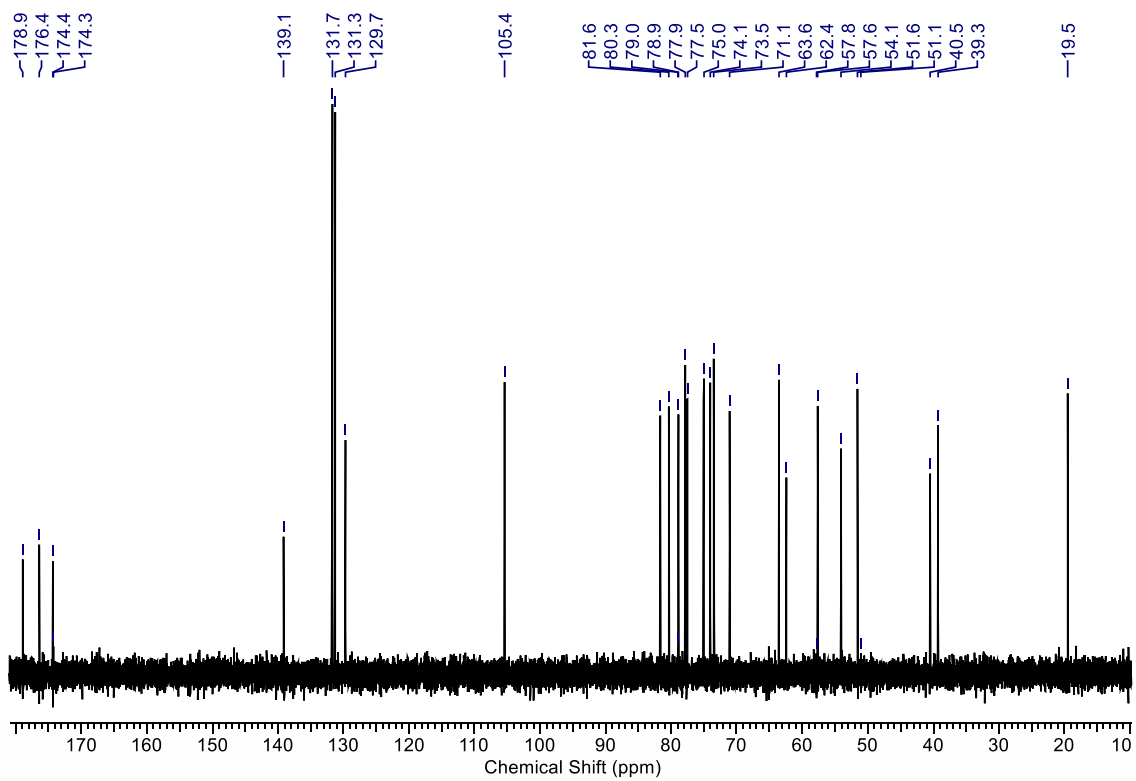

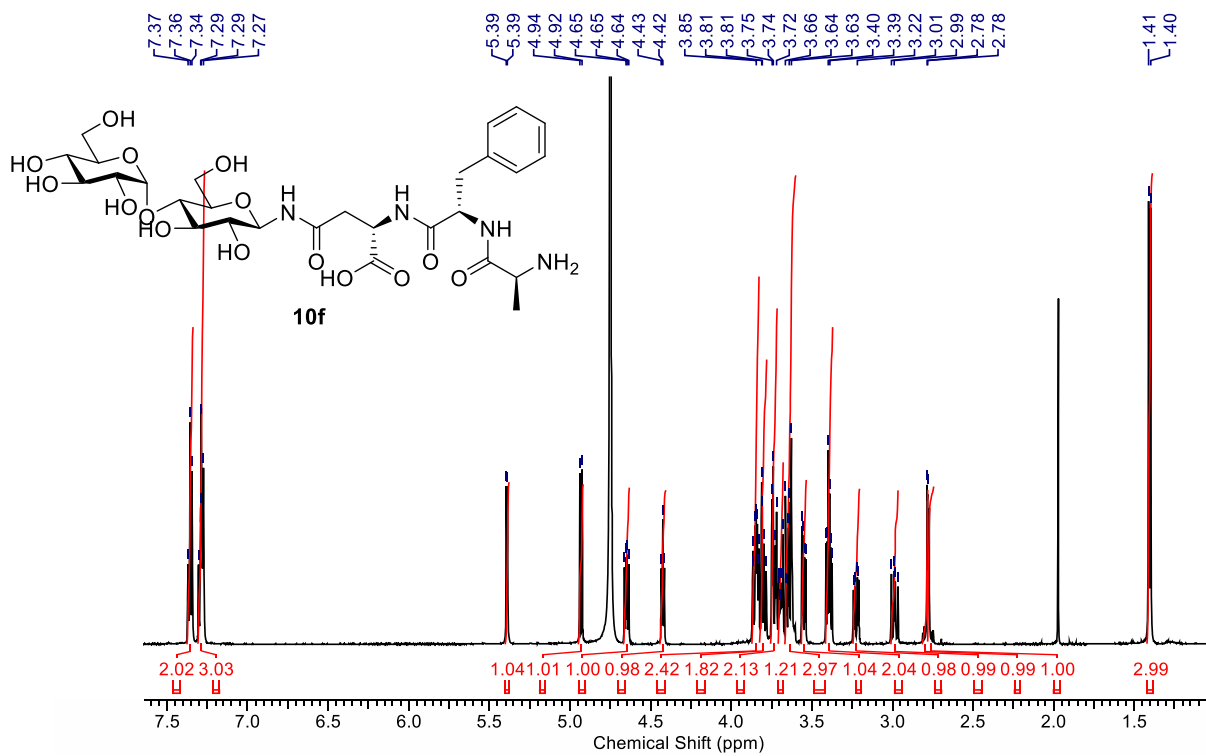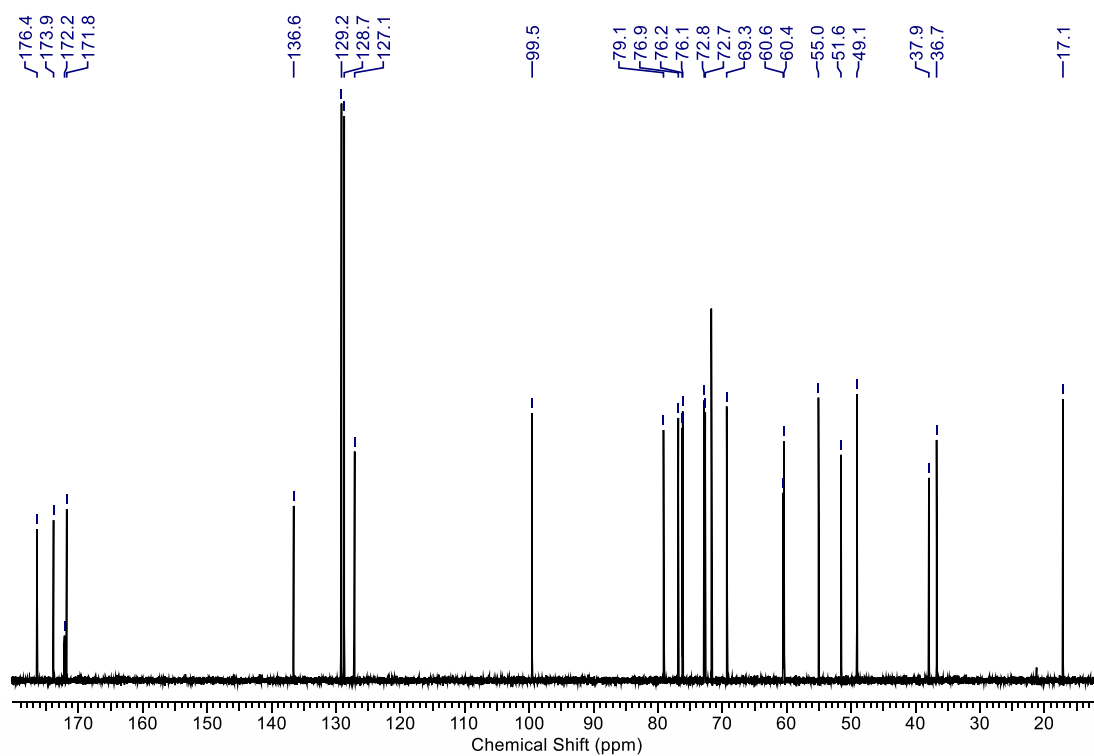

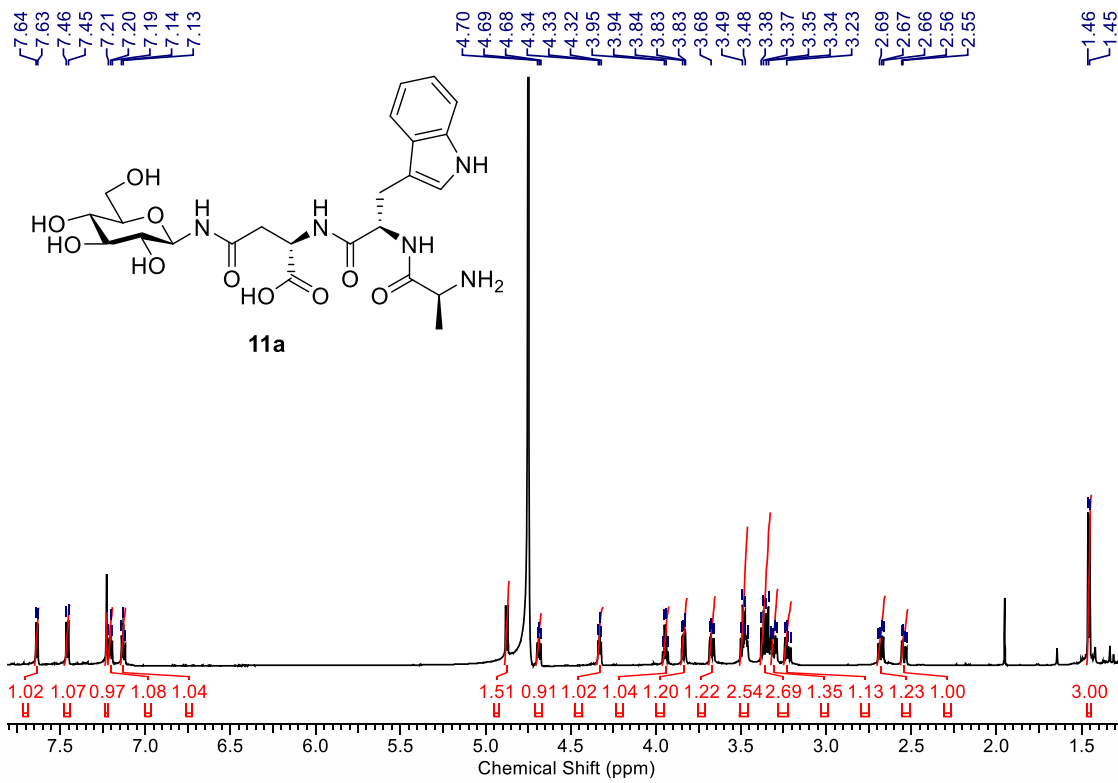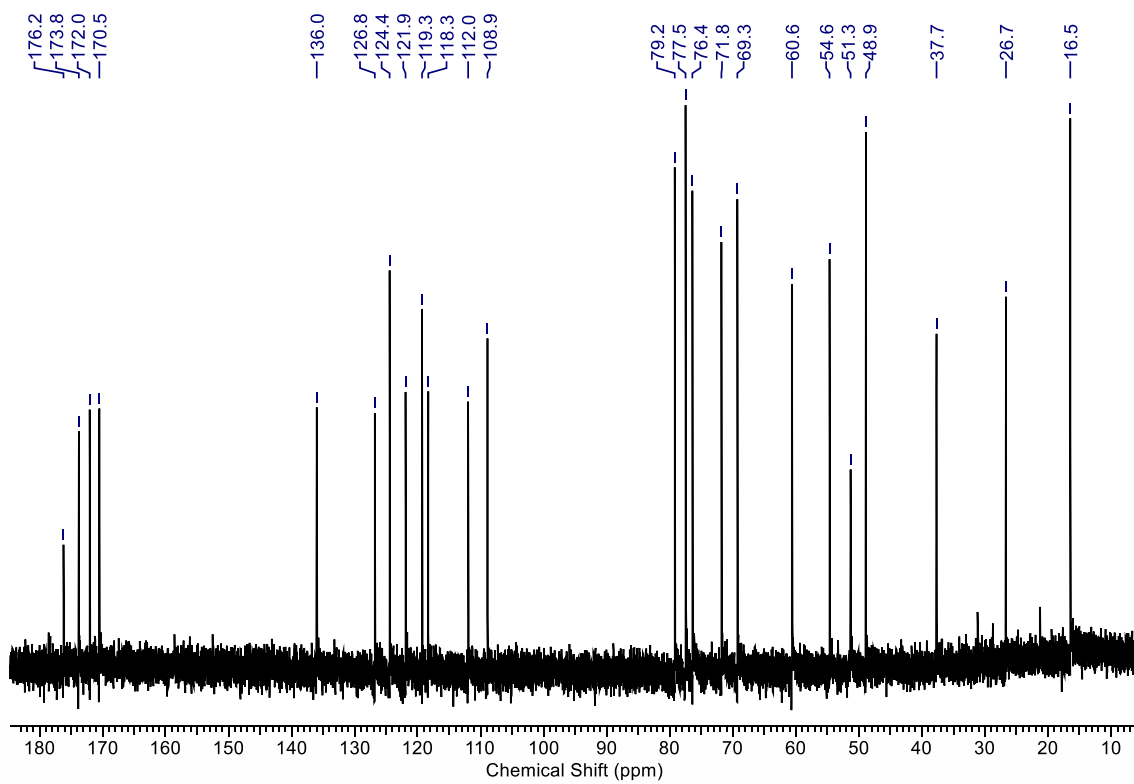

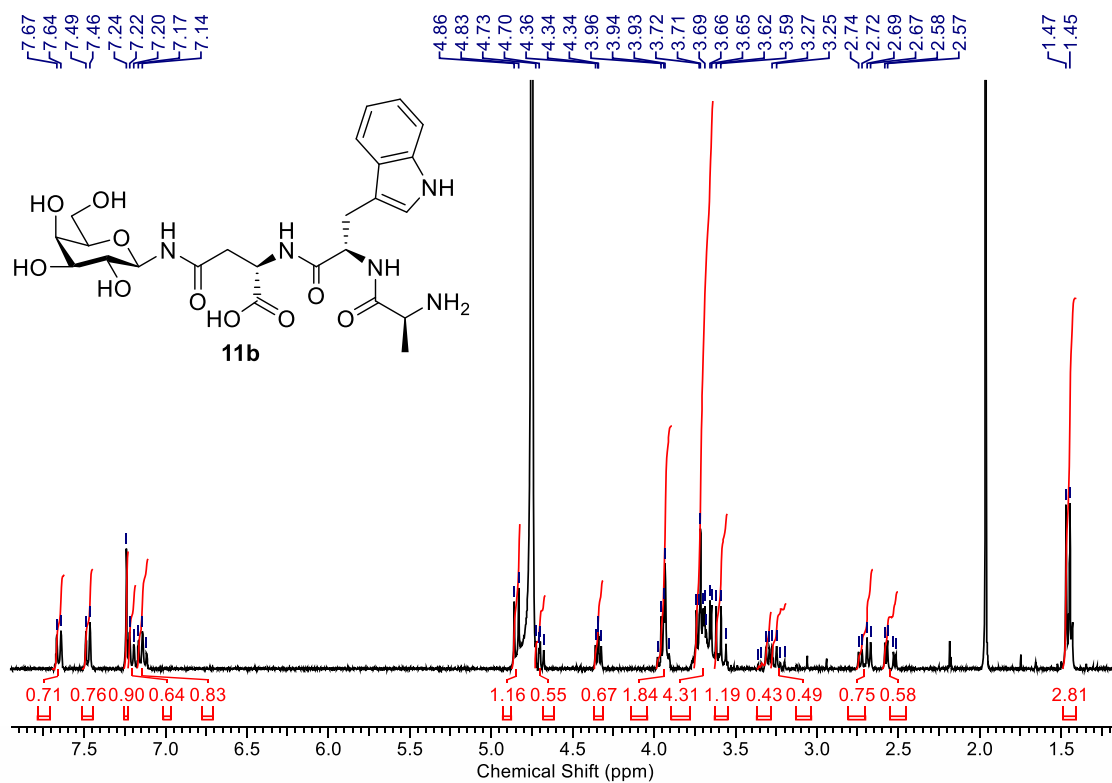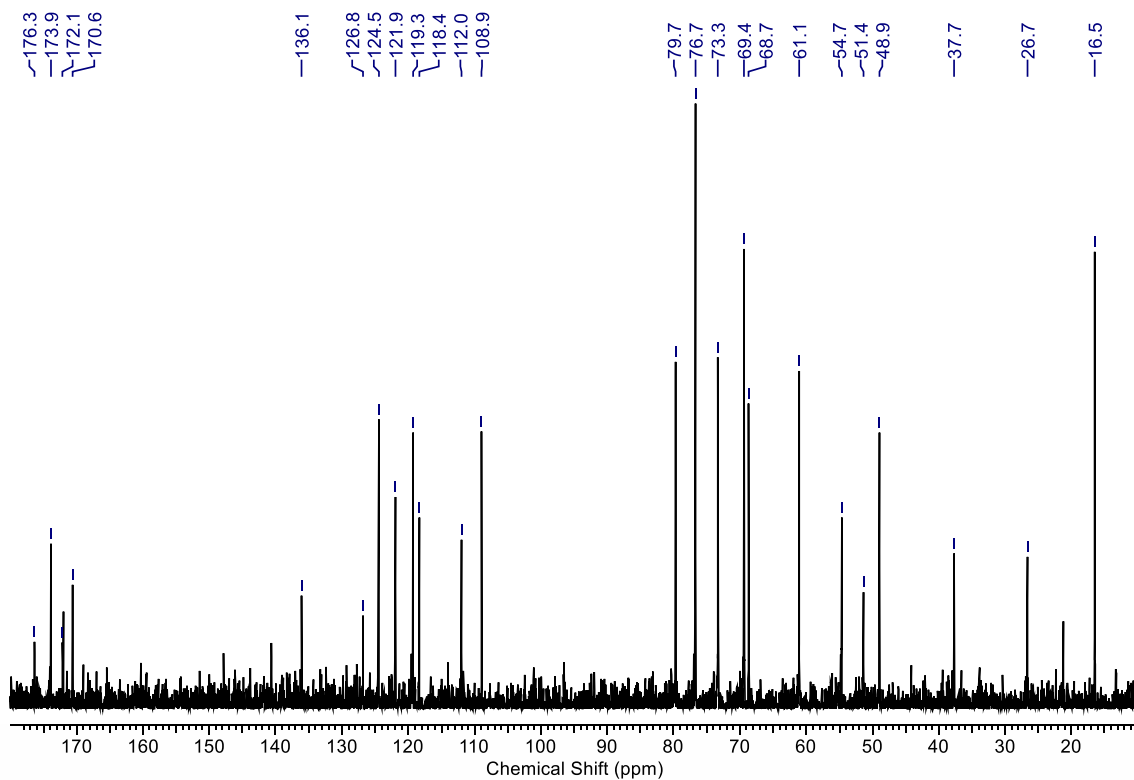

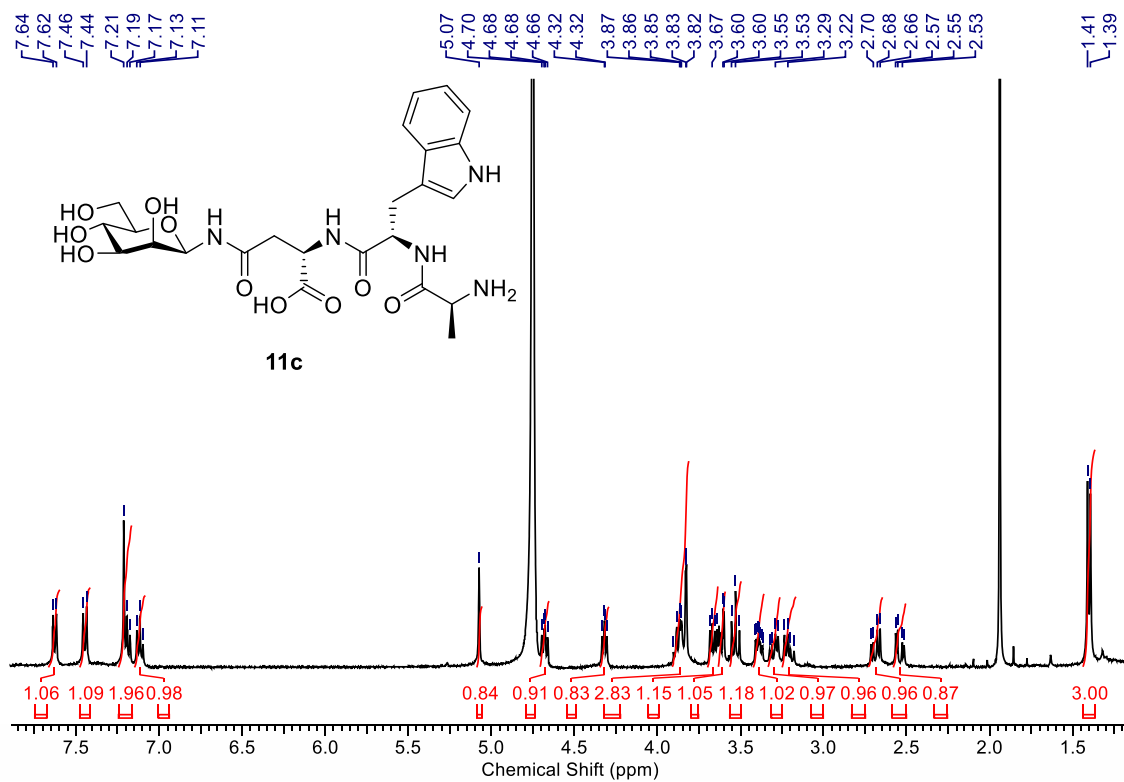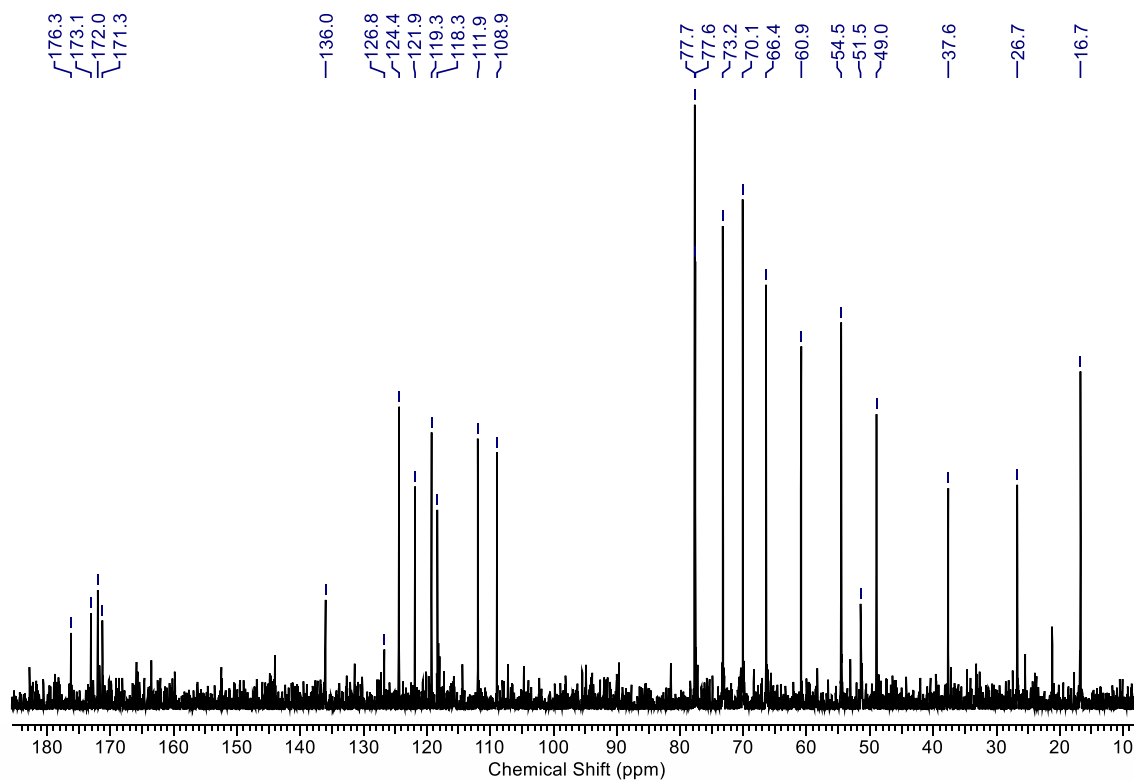



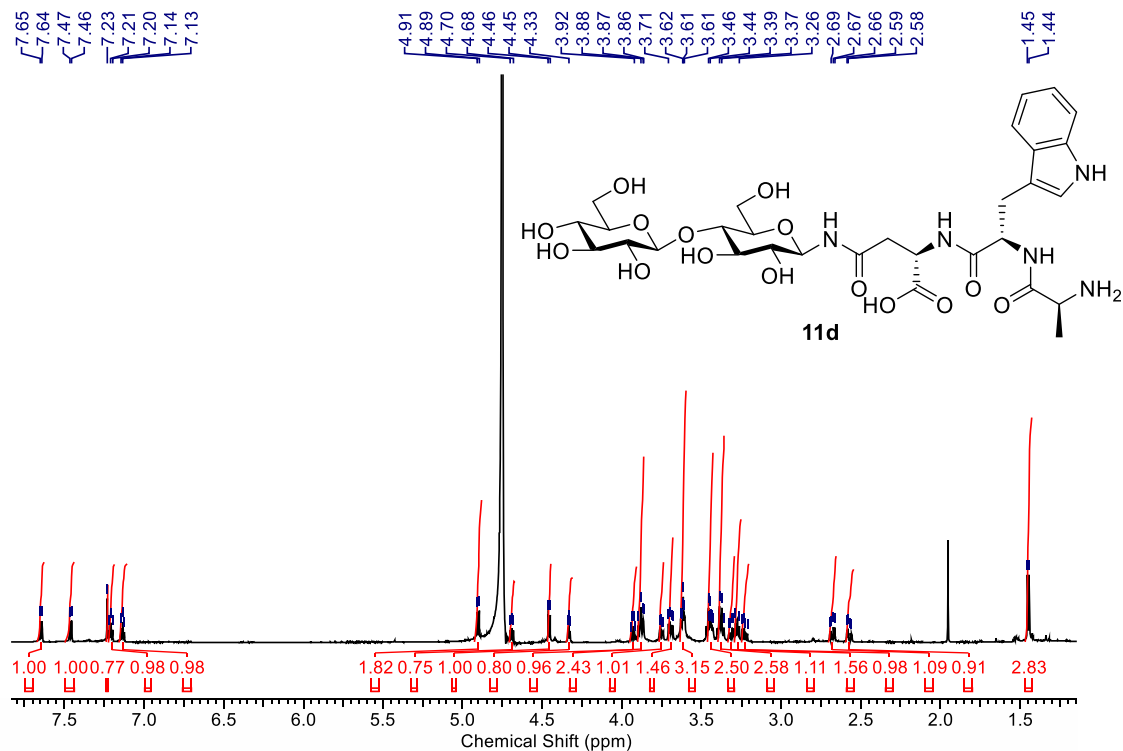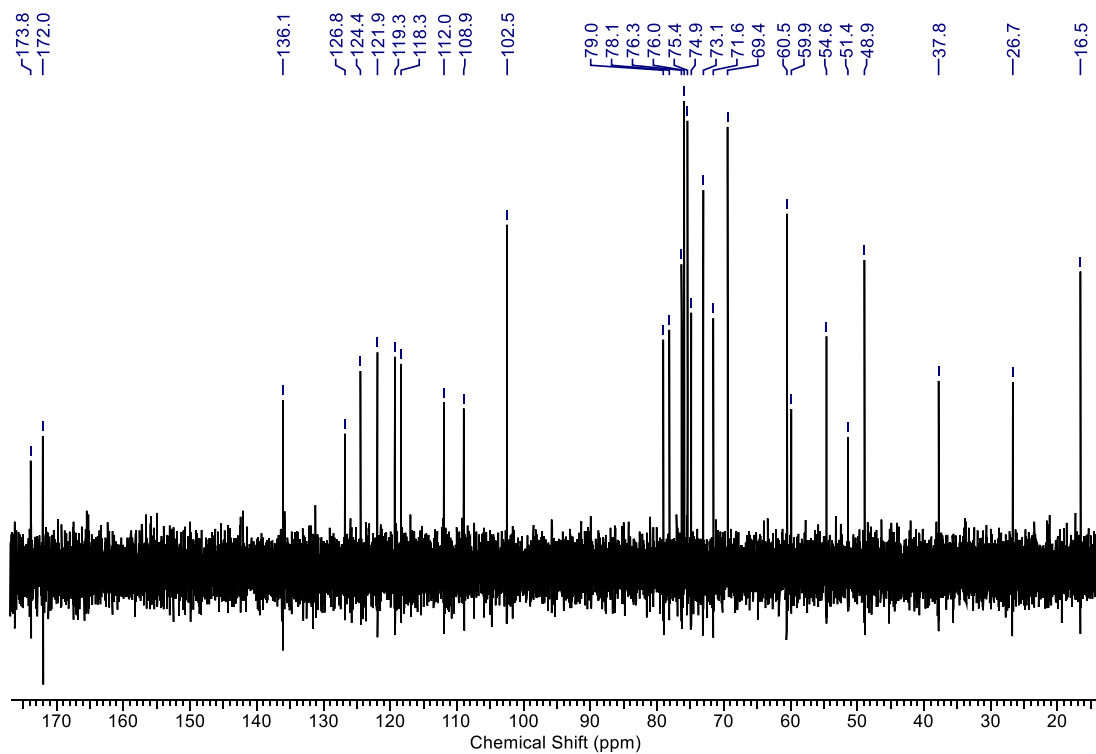

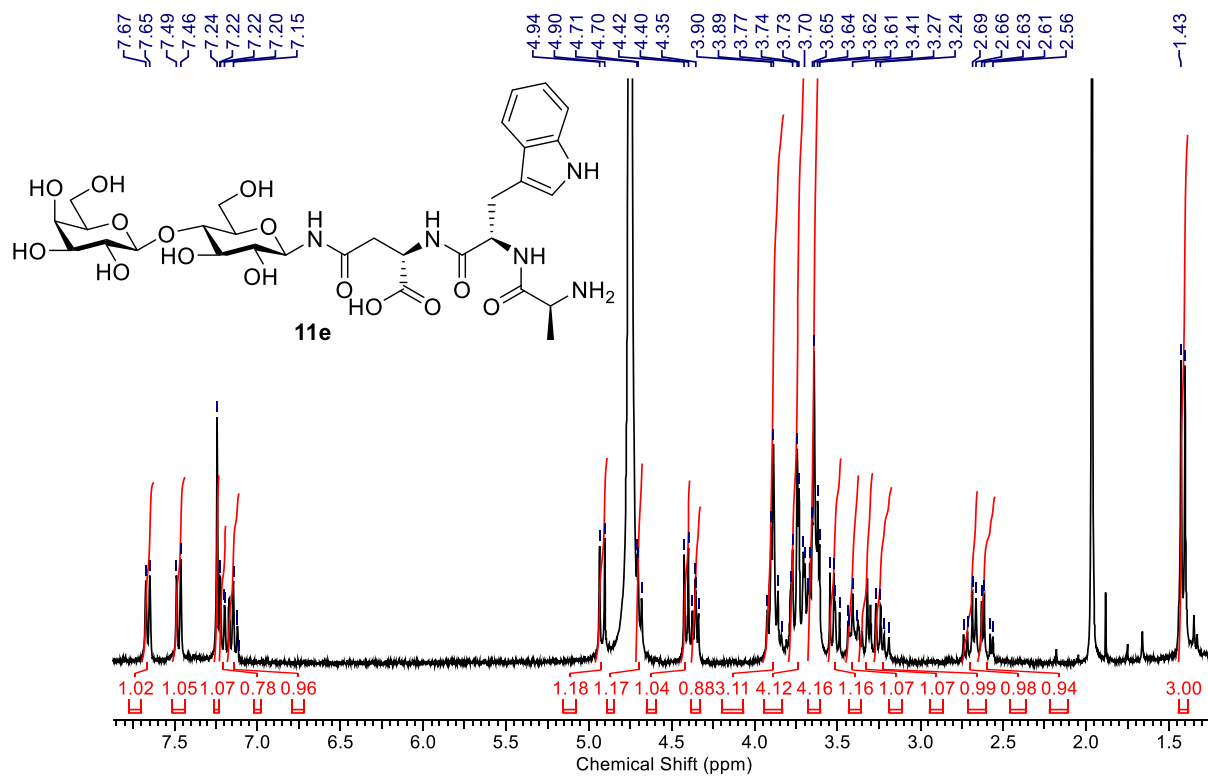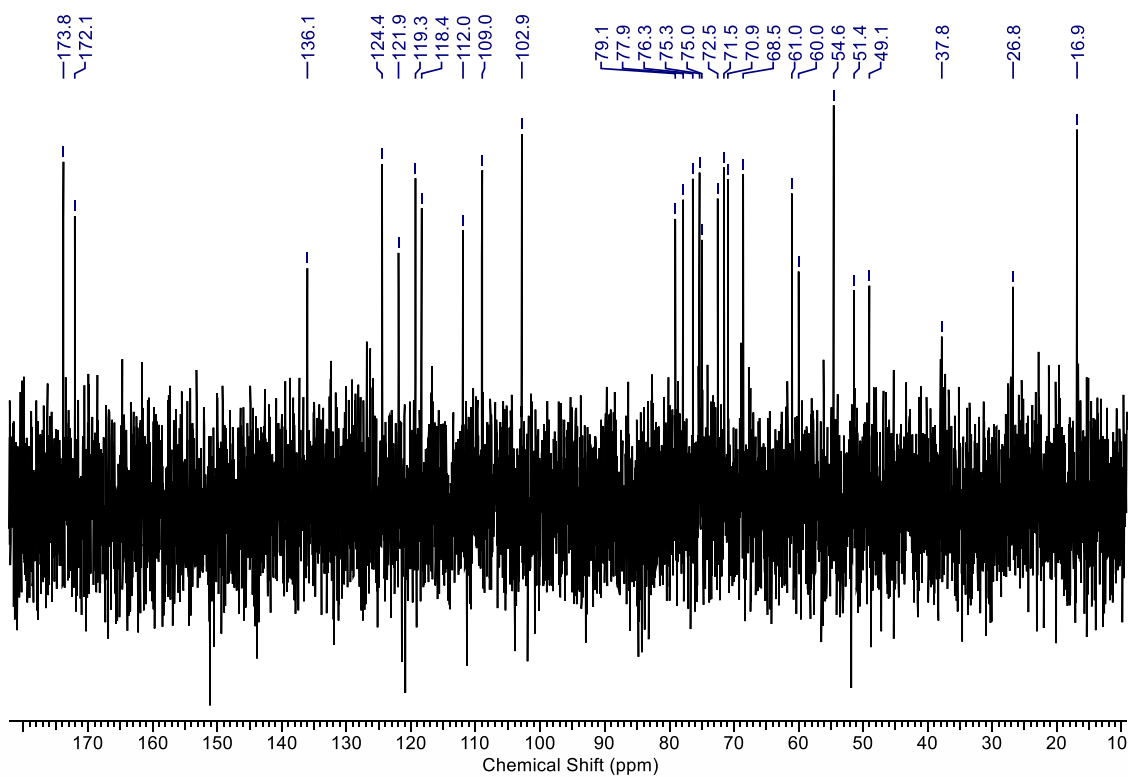

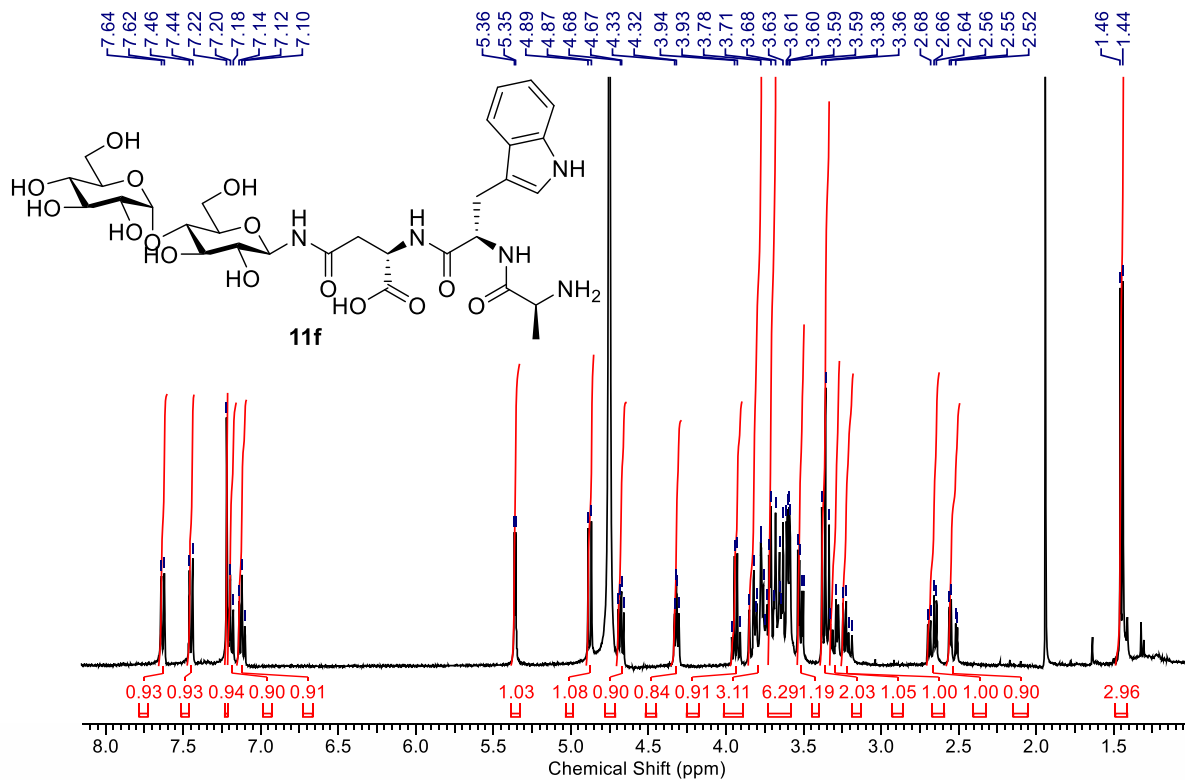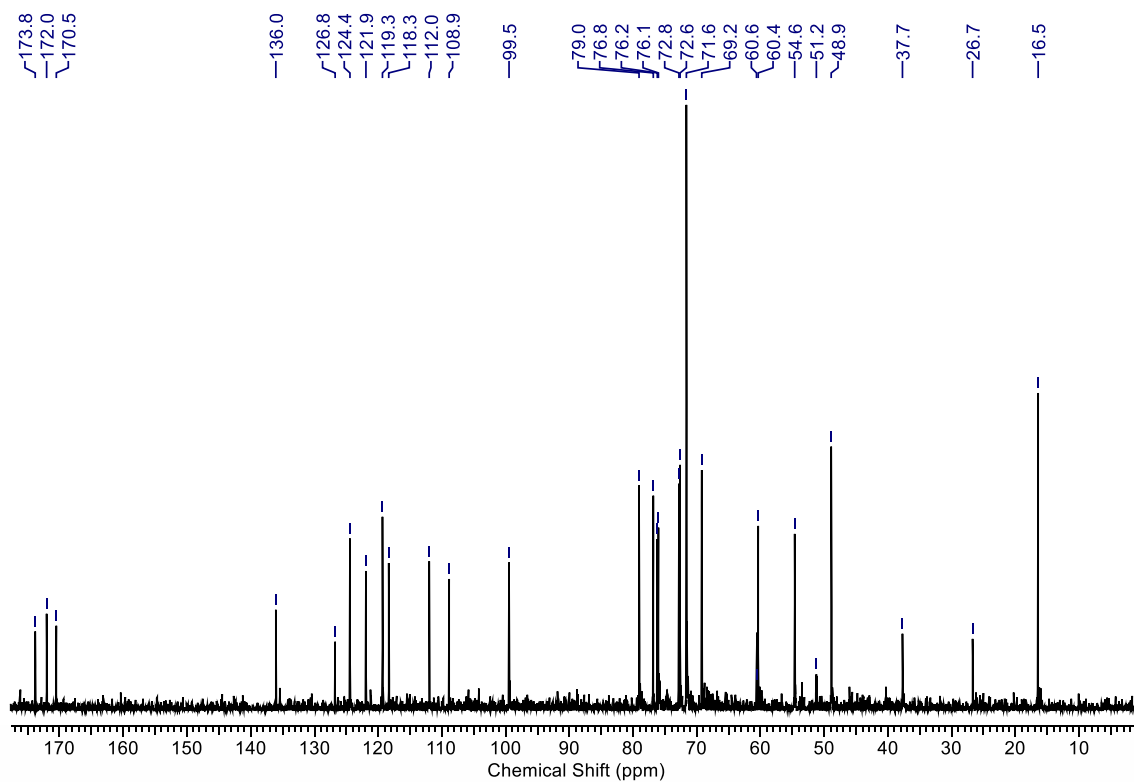

Supplement: Beilstein_J_Org_Chem-16-888-s002.pdf [file Beilstein_J_Org_Chem-16-888-s002.pdf]
