# Supplementary material for: Synthesis of new asparagine-based glycopeptides for future scanning tunneling microscopy investigations
Source: PubMed Central journal article supplement (PMC7214877; doi:10.3762/bjoc.16.80), 2020-04-30
Supplement: Beilstein_J_Org_Chem-16-888-s001.pdf [file Beilstein_J_Org_Chem-16-888-s001.pdf]

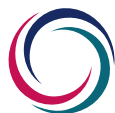

## Supporting Information

for

### **Synthesis of new asparagine-based glycopeptides for future scanning tunneling microscopy investigations**

Laura Sršan and Thomas Ziegler

*Beilstein J. Org. Chem.* **2020**, *16*, 888–894. [doi:10.3762/bjoc.16.80](https://doi.org/10.3762/bjoc.16.80)

### **General methods, experimental procedures, and product characterization data of the compounds 1a–f to 11a–f**

## General Information

All solvents were dried and/or distilled prior to use. The reaction progress was monitored by TLC on Polygram Sil G/UV silica gel plates from Machery & Nagel. The visualization was performed by charring with H<sub>2</sub>SO<sub>4</sub> (5% in EtOH), molybdenum blue, or by using UV light. Flash column chromatography was performed on silica gel (0.032–0.063 mm) from Machery & Nagel, and a HD 2-400 pump from Besta with a Dynamax UV-1 absorbance detector was used. NMR spectra were recorded on a Bruker Avance III HD 400, a Bruker Avance III HD 300 NanoBay, a Bruker Avance III HDX 600, or a Bruker Avance III HDX 700. Chemical shifts  $\delta$  are given in ppm and coupling constants in Hz. The residual proton signal of the deuterated solvent was used as the internal standard. High-resolution mass spectra were recorded on a Bruker Daltonics maxis 4G. Elemental analyses were performed on HEKA-tech Euro EA 3000. Melting points were determined on a Melting Point M-560 from Büchi and are uncorrected. Optical rotations were measured with a Perkin-Elmer Polarimeter 341.

Due to the polar structure and free functional groups of **8a–f** to **11a–f** where hydrogen bonds can occur, we disclaimed elemental analyses since they would be unrepresentative.

## Experimental data

### General Procedure A for the synthesis of 1a/b/d/e/f

To a solution of the glycosyl halide (1.0 equiv) in acetone (4 mL per 1.0 mmol), NaN<sub>3</sub> (1.2 equiv) dissolved in water (1 mL per 1.0 mmol) was added, and this was stirred for 16 h at room temperature. After the solvent was evaporated, the residue was taken up in DCM and washed with water (3 × 20 mL). The combined organic phases were dried over Na<sub>2</sub>SO<sub>4</sub> and reduced in vacuo. The crude product was recrystallized from EtOH and obtained as a colorless, crystalline solid. The analytical characterization was done according to the literature [1-8].

### General Procedure B for the synthesis of 2a-f

**1a-f** (1.0 equiv), respectively, and Pd (10 wt % on charcoal) were suspended in ethyl acetate (10 mL per 1.0 mmol), and this was stirred under a H<sub>2</sub> atmosphere. After the complete conversion of the starting material, as monitored by TLC analysis (1 to 24 h), the crude mixture was filtered over celite and washed with ethyl acetate. After evaporation of the solvent, the colorless solid was used without further purification. The analytical characterization of **2a/b/d/e** was according to literature and/or has been fully completed [1,9-12].

### General Procedure C for the synthesis of 3a-f

Under a N<sub>2</sub> atmosphere, a solution of HBTU (Procedure C1) or HATU (Procedure C2, 1.1 equiv) and the free amino acid (1.1 equiv) in dry DMF (5 mL per 1.0 mmol) were added to an icecold solution of the free amine in dry DMF (3 mL per 1.0 mmol), followed by the addition of dry DIPEA (1.3 equiv). The reaction mixture was allowed to warm to room temperature. After the complete conversion (HBTU: 15 to 18 h, HATU: 1 to 2 h), as monitored by TLC

analysis, the solvent was evaporated in vacuo. The residue was taken up in ethyl acetate and washed with aq citric acid (10%), aq NaHCO<sub>3</sub> solution, and brine (each 3 × 20 mL). The combined organic layers were dried over Na<sub>2</sub>SO<sub>4</sub> and concentrated in vacuo. The crude product was purified by column chromatography (PE/EE 2:3→1:2) to give a colorless or yellowish solid. The analytical characterization of **3a–c/e** was done according to the literature [13].

#### **General Procedure D for the synthesis of 4a–f to 7a–f**

After 10 minutes of stirring the protected peptide in piperidine/DMF (20 vol %, 15 mL per 1.0 mmol, the progress was monitored by TLC analysis), the solvent was evaporated in vacuo and the crude product was used without further purification. After at least 1 h of drying in a high vacuum, the General Procedure for **7** (HBTU: Procedure D1; HATU: Procedure D2) was repeated.

#### **General Procedure E for the synthesis of 8a–f to 9a–f**

The peptide was stirred in a solution of DCM, TFA, and water (10:10:1). After the full conversion (TLC), the solvent was removed in a flow of N<sub>2</sub>. The residue was dissolved in a mixture of acetonitrile/water (1:1) and lyophilized. The product was isolated as a fluffy white, yellow, or red solid.

#### **General Procedure F for the synthesis of 10a–f to 11a–f**

The unprotected acid was stirred for approximately 65 h in a 7 M NH<sub>3</sub> solution in MeOH (5 mL per 1.0 mmol). The precipitated solid was filtered off and washed with petroleum ether. Where no precipitation occurred, the solvent was evaporated. The product was then isolated by

tritulating the residue with petroleum ether and extraction with water. After lyophilization of the aqueous solution (with added acetonitrile in case of a low solubility), the fully deprotected glycopeptide was obtained as a white to yellowish solid.

### 2,3,4,6-Tetra-*O*-acetyl- $\beta$ -D-mannopyranosyl azide (**1c**)[14]

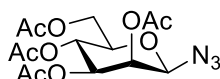

Under a  $N_2$  atmosphere, 2,3,4,6-tetra-*O*-acetyl- $\beta$ -D-galactopyranosyl bromide (2.04 g, 4.97 mmol, 1.0 equiv) and  $NaN_3$  (678 mg, 10.4 mmol, 2.1 equiv) were dissolved in dry DMF (20 mL). The solution was stirred for 15 h at 80 °C. After evaporation of the solvent, the residue was taken up in ethyl acetate (50 mL). The inorganic, insoluble residue was filtrated off. The organic phase was washed with a saturated  $NaHCO_3$  solution ( $3 \times 30$  mL), a 5 wt % HCl solution ( $2 \times 20$  mL), and brine ( $3 \times 30$  mL). The combined organic phases were dried over  $Na_2SO_4$  and the solvent was removed in vacuo. The crude product was recrystallized from EtOH to afford **1c** (611 mg, 1.64 mmol, 33%) as a colorless, crystalline solid.

**$^1H$  NMR** (400 MHz,  $CDCl_3$ ):  $\delta$  = 5.43 (dd,  $J_{2,3} = 3.3$  Hz,  $J_{2,1} = 1.1$  Hz, 1H, H-2), 5.21–5.28 (m, 1H, H-4), 5.03 (dd,  $J_{3,4} = 10.1$  Hz,  $J_{3,2} = 3.2$  Hz, 1H, H-3), 4.72 (d,  $J_{1,2} = 1.2$  Hz, 1H, H-1), 4.27 (dd,  $J_{6a,6b} = 12.4$  Hz,  $J_{6a,5} = 5.6$  Hz, 1H, H-6a), 4.17–4.22 (dd,  $J_{6b,6a} = 12.4$  Hz,  $J_{6b,5} = 2.5$  Hz, 1H, H-6b), 3.75 (ddd,  $J_{5,4} = 9.9$  Hz,  $J_{5,6a} = 5.6$  Hz,  $J_{5,6b} = 2.6$  Hz, 1H, H-5), 2.20, 2.10, 2.04, 1.98 (s, 12H,  $CH_3$ ).

**$^{13}C$  NMR** (75 MHz,  $CDCl_3$ ):  $\delta$  = 170.6, 169.9, 169.5 (AcC=O), 85.1 (C-1), 74.6 (C-5), 70.9 (C-3), 69.2 (C-2), 65.3 (C-4), 62.3 (C-6), 20.7, 20.6, 20.5 ( $CH_3$ ).

**m.p.** 123 °C (EtOH) (literature 124 °C)[15].  $[\alpha]_D^{20} = -76.0$  ( $c = 1$ ,  $CHCl_3$ ). **Mass Anal.** Calcd for  $C_{14}H_{19}N_3O_9$   $[M+Na]^+$ :  $m/z$  396.10; MS found  $[M+Na]^+$ :  $m/z$  396.06.

### 2,3,4,6-Tetra-*O*-acetyl- $\beta$ -D-glucopyranosylamine (**2a**)

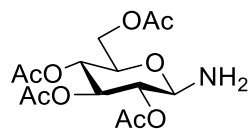

According to General Procedure B, **2a** was obtained from **1a** as a colorless solid. Yield: 99%.

$^1\text{H NMR}$  (300 MHz,  $\text{CDCl}_3$ ):  $\delta$  = 5.17–5.26 (m, 1H, H-3), 4.98–5.06 (m, 1H, H-4), 4.78–4.86 (m, 1H, H-2), 4.17–4.25 (m, 2H, H-1, H-6a), 4.05–4.13 (m, 1H, H-6b), 3.64–3.71 (ddd,  $J$  = 7.2 Hz,  $J$  = 4.8 Hz,  $J$  = 2.4 Hz, 1H, H-5), 2.34 (br. s., 2H,  $\text{NH}_2$ ), 2.07, 2.05, 2.00, 1.99 (s, 12H,  $\text{CH}_3$ ).

$^{13}\text{C NMR}$  (75 MHz,  $\text{CDCl}_3$ ):  $\delta$  = 170.7, 170.2, 170.2, 169.5 (C=O), 84.9 (C-1), 73.1 (C-3), 72.7 (C-5), 72.0 (C-2), 68.7 (C-4), 62.3 (C-6), 20.8, 20.7, 20.6, 20.6 ( $\text{CH}_3$ ).

$[\alpha]_{\text{D}}^{20}$  = + 16.0 ( $c$  = 1,  $\text{CHCl}_3$ ). **Mass Anal.** Calcd for  $\text{C}_{14}\text{H}_{21}\text{NO}_9$   $[\text{M}+\text{Na}]^+$ :  $m/z$  370.31; **MS** found  $[\text{M}+\text{Na}]^+$ :  $m/z$  370.20.

### 2,3,4,6-Tetra-*O*-acetyl- $\beta$ -D-galactopyranosylamine (**2b**)

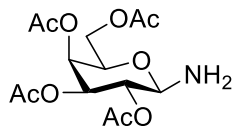

According to General Procedure B, **2b** was obtained from **1b** as a colorless solid. Yield: 99%.

$^1\text{H NMR}$  (400 MHz,  $\text{CDCl}_3$ ):  $\delta$  = 5.38 (dd,  $J_{4,3}$  = 2.9 Hz,  $J_{4,5}$  = 0.9 Hz, 1H, H-4), 4.98–5.07 (m, 2H, H-2, H-3), 4.15 (d,  $J_{1,2}$  = 8.3 Hz, 1H, H-1), 4.07–4.10 (m, 2H, H-6a, H-6b), 3.88 (td,  $J_{5,6}$  = 6.6 Hz,  $J_{5,4}$  = 1.0 Hz, 1H, H-5), 2.14, 2.06, 2.04, 1.97 (s, 12H,  $\text{CH}_3$ ).

$^{13}\text{C}$  NMR (101 MHz,  $\text{CDCl}_3$ ):  $\delta = 170.5, 170.2, 170.1$  (AcC=O), 85.3 (C-1), 71.4 (C-5), 71.3 (C-3), 69.7 (C-2), 67.6 (C-4), 61.8 (C-6), 20.9, 20.7, 20.7, 20.6 ( $\text{CH}_3$ ).

$[\alpha]_{\text{D}}^{20} = +26.4$  ( $c = 1, \text{CHCl}_3$ ). **Mass Anal.** Calcd for  $\text{C}_{14}\text{H}_{21}\text{NO}_9$   $[\text{M}+\text{Na}]^+$ :  $m/z$  370.31; MS found  $[\text{M}+\text{Na}]^+$ :  $m/z$  370.08.

### 2,3,4,6-Tetra-*O*-acetyl- $\beta$ -D-mannopyranosylamine (**2c**)

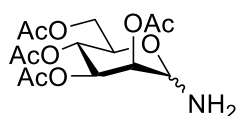

$\alpha:\beta$  1:10

According to General Procedure B, **2c** was obtained from **1c** in an anomeric ratio of  $\alpha:\beta$  1:10 as a colorless solid. Yield: 99%.

$^1\text{H}$  NMR (400 MHz,  $\text{CDCl}_3$ ):  $\delta = 5.39$  (dd,  $J_{2,3} = 3.2$  Hz,  $J_{2,1} = 0.7$  Hz, 1H,  $\beta$ -H-2), 5.32 (dd,  $J = 9.2$  Hz,  $J = 3.3$  Hz, 1H,  $\alpha$ -H-3), 5.14–5.25 (m, 3H,  $\alpha$ -H-2,  $\alpha$ -H-4,  $\beta$ -H-4), 5.05 (dd,  $J_{3,4} = 10.2$  Hz,  $J_{3,2} = 3.3$  Hz, 1H,  $\beta$ -H-3), 4.87–4.89 (d,  $J_{1,2} = 2.5$  Hz, 1H,  $\alpha$ -H-1), 4.45 (d,  $J_{1,2} = 1.0$  Hz, 1H,  $\beta$ -H-1), 4.27–4.35 (m, 2H,  $\alpha$ -H-6a,  $\alpha$ -H-6b), 4.24 (dd,  $J_{6a,6b} = 12.2$  Hz,  $J_{6a,5} = 5.6$  Hz, 1H, H-6a), 4.10 (dd,  $J_{6b,6a} = \text{Hz}$ ,  $J_{6b,5} = 2.3$  Hz, 1H,  $\beta$ -H-6b), 3.65 (ddd,  $J_{5,4} = 8.1$  Hz,  $J_{5,6a} = 5.6$  Hz,  $J_{5,6b} = 2.3$  Hz, 2H,  $\alpha$ -H-5,  $\beta$ -H-5), 2.14–2.20 (m, 5H,  $\beta$ - $\text{CH}_3$ ,  $\text{NH}_2$ ), 2.14 (s, 3H,  $\alpha$ - $\text{CH}_3$ ), 2.09 (s, 3H,  $\beta$ - $\text{CH}_3$ ), 2.05 (s, 3H,  $\alpha$ - $\text{CH}_3$ ), 2.02 (s, 3H,  $\beta$ - $\text{CH}_3$ ), 2.00 (s, 3H,  $\alpha$ - $\text{CH}_3$ ), 1.96 (s, 3H,  $\beta$ - $\text{CH}_3$ ).

$^{13}\text{C}$  NMR (101 MHz,  $\text{CDCl}_3$ ):  $\delta = 170.7, 170.2, 170.1, 169.7$  (AcC=O), 82.2 ( $\beta$ -C-1), 81.0 ( $\alpha$ -C-1), 73.3 ( $\beta$ -C-5), 72.0 ( $\beta$ -C-3), 70.7 ( $\beta$ -C-2), 69.0 ( $\alpha$ -C-3), 68.3 ( $\alpha$ -C-5), 66.7 ( $\alpha$ -C-2,  $\alpha$ -C-4), 65.8 ( $\beta$ -C-4), 62.8 ( $\beta$ -C-6), 62.5 ( $\alpha$ -C-6), 20.8, 20.8, 20.7, 20.6 ( $\text{CH}_3$ ).

**Mass Anal.** Calcd for  $C_{14}H_{21}NO_9$   $[M+Na]^+$ :  $m/z$  370.11085; HRMS found  $[M+Na]^+$ :  $m/z$  370.11083.

**2,2',3,3',4',6,6'-Hepta-O-acetyl- $\beta$ -D-cellobiosylamine (2d)**

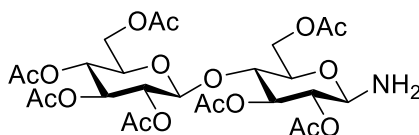

According to General Procedure B, **2d** was obtained from **1d** as a colorless solid. Yield: 99%.

**$^1H$  NMR** (400 MHz,  $CDCl_3$ ):  $\delta$  = 5.16–5.22 (m, 1H, H-3), 5.08–5.15 (m, 1H, H-3'), 5.01–5.08 (m, 1H, H-4'), 4.87–4.93 (m, 1H, H-2'), 4.69–4.76 (m, 1H, H-2), 4.43–4.53 (m, 2H, H-6a, H-1'), 4.35 (dd,  $J_{6a',6b'} = 12.5$  Hz,  $J_{6a',5'} = 4.3$  Hz, 1H, H-6a'), 4.15 (d,  $J_{1,2} = 9.0$  Hz, 1H, H-1), 4.05–4.11 (m, 1H, H-6b), 4.00–4.05 (m, 1H, H-6b'), 3.66–3.73 (m, 1H, H-4), 3.63 (ddd,  $J_{5',4'} = 9.8$  Hz,  $J_{5',6a} = 4.3$  Hz,  $J_{5',6b'} = 2.3$  Hz, 1H, H-5'), 3.57 (ddd,  $J = 9.8$  Hz,  $J = 4.9$  Hz,  $J = 1.7$  Hz, 1H, H-5), 2.11, 2.07, 2.04, 2.01, 2.00, 1.99, 1.96 (s, 21H,  $CH_3$ ).

**$^{13}C$  NMR** (101 MHz,  $CDCl_3$ ):  $\delta$  = 170.5, 170.4, 170.4, 170.2, 169.7, 169.3, 169.0 (AcC=O), 100.8 (C-1'), 84.5 (C-1), 76.8 (C-4), 73.7 (C-5), 72.9 (C-3'), 72.6 (C-3), 72.3 (C-2), 71.9 (C-5'), 71.6 (C-2'), 67.8 (C-4'), 62.2 (C-6), 61.5 (C-6'), 20.9, 20.8, 20.6, 20.5, 20.5 ( $CH_3$ ).

$[\alpha]_D^{20} = -2.5$  ( $c = 0.5$ ,  $CHCl_3$ ). **Mass Anal.** Calcd for  $C_{26}H_{37}N_3O_{17}$   $[M+H]^+$ :  $m/z$  636.31; MS found  $[M+H]^+$ :  $m/z$  684.18.



### 2,2',3,3',4',6,6'-Hepta-*O*-acetyl- $\beta$ -D-lactosylamine (**2e**)

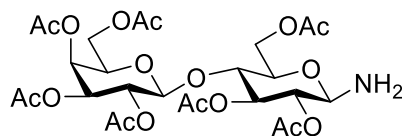

According to General Procedure B, **2e** was obtained from **1e** as a colorless solid. Yield: 99%.

**<sup>1</sup>H NMR** (400 MHz, CDCl<sub>3</sub>):  $\delta$  = 5.33 (dd,  $J$  = 3.3 Hz,  $J$  = 0.9 Hz, 1H, H-4'), 5.18–5.24 (m, 1H, H-3), 5.09 (dd,  $J$  = 10.4 Hz,  $J$  = 7.9 Hz, 1H, H-2'), 4.93 (dd,  $J$  = 10.4 Hz,  $J$  = 3.4 Hz, 1H, H-3'), 4.70–4.76 (m, 1H, H-2), 4.42–4.47 (m, 2H, H-6a, H-1'), 4.16 (d,  $J_{1,2}$  = 9.0 Hz, 1H, H-1), 4.03–4.14 (m, 3H, H-6b, H-6a', H-6b'), 3.82–3.88 (m, 1H, H-5'), 3.69–3.76 (m, 1H, H-4), 3.59 (ddd,  $J$  = 9.9 Hz,  $J$  = 5.1 Hz,  $J$  = 2.0 Hz, 1H, H-5), 2.13, 2.11, 2.05, 2.04, 2.03, 2.02, 1.94 (s, 21H, CH<sub>3</sub>).

**<sup>13</sup>C NMR** (101 MHz, CDCl<sub>3</sub>):  $\delta$  = 170.5, 170.4, 170.3, 170.1, 170.0, 169.6, 169.0 (AcC=O), 101.0 (C-1'), 84.6 (C-1), 76.6 (C-4), 73.6 (C-5), 72.9 (C-3), 72.4 (C-2), 71.0 (C-3'), 70.6 (C-5'), 69.1 (C-2'), 66.6 (C-4'), 62.3 (C-6), 60.8 (C-6'), 20.9, 20.8, 20.6, 20.5 (CH<sub>3</sub>).

$[\alpha]_D^{20}$  = + 4.7 ( $c$  = 0.5, CHCl<sub>3</sub>). **Mass Anal.** Calcd for C<sub>26</sub>H<sub>37</sub>N<sub>3</sub>O<sub>17</sub> [M+Na]<sup>+</sup>:  $m/z$  636.31; MS found [M+H]<sup>+</sup>:  $m/z$  636.12.

### 2,2',3,3',4',6,6'-Hepta-*O*-acetyl- $\beta$ -D-maltosylamine (**2f**)

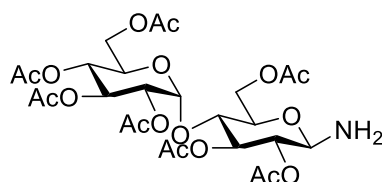

According to General Procedure B, **2f** was obtained from **1f** as a colorless solid. Yield: 82%.

**<sup>1</sup>H NMR** (400 MHz, CDCl<sub>3</sub>): δ = 5.39 (d,  $J_{1',2'} = 4.0$  Hz, 1H, H-1'), 5.34 (dd,  $J_{3',2'} = 10.4$  Hz,  $J_{3',4'} = 9.7$  Hz, 1H, H-3'), 5.25–5.31 (m, 1H, H-3), 5.00–5.07 (m, 1H, H-4'), 4.82–4.87 (dd,  $J_{2',3'} = 10.5$  Hz,  $J_{2',1'} = 4.0$  Hz, H-2'), 4.65–4.72 (m, 1H, H-2), 4.46 (dd,  $J_{6a,6b} = 12.1$  Hz,  $J_{6a,5} = 2.4$  Hz, 1H, H-6a), 4.21–4.28 (m, 2H, H-1, H-6a'), 4.17 (dd,  $J_{6b,6a} = 12.1$  Hz,  $J_{6b,5} = 4.4$  Hz, 1H, H-6b), 4.03 (dd,  $J_{6b',6a'} = 12.5$  Hz,  $J_{6b',5'} = 2.2$  Hz, 1H, H-6b'), 3.91–3.98 (m, 2H, H-4, H-5'), 3.67 (ddd,  $J_{5,4} = 7.2$  Hz,  $J_{5,6b} = 4.5$  Hz,  $J_{5,6a} = 2.2$  Hz, 1H, H-5), 2.13, 2.08, 2.04, 2.03, 2.01, 1.99, 1.98 (s, 21H, CH<sub>3</sub>).

**<sup>13</sup>C NMR** (101 MHz, CDCl<sub>3</sub>): δ = 170.6, 170.6, 170.5, 170.4, 170.0, 169.9, 169.4 (AcC=O), 95.5 (C-1'), 83.7 (C-1), 75.5 (C-3), 73.2 (C-5), 72.8, 72.7 (C-2, C-4), 69.9 (C-2'), 69.3 (C-3'), 68.5 (C-5'), 67.9 (C-4'), 63.0 (C-6), 61.4 (C-6'), 20.9, 20.8, 20.7, 20.6, 20.6 (CH<sub>3</sub>).

$[\alpha]_D^{20} = +38.6$  (c = 0.5, CHCl<sub>3</sub>). **Mass Anal.** Calcd for C<sub>26</sub>H<sub>37</sub>N<sub>3</sub>O<sub>17</sub> [M+H]<sup>+</sup>: m/z 636.21343; HRMS found [M+Na]<sup>+</sup>: m/z 636.21422.

***N*<sup>2</sup>-[(9*H*-Fluoren-9-ylmethoxy)carbonyl]-*N*-(2,3,4,6-tetra-*O*-acetyl-β-*D*-glucopyranosyl)-*L*-asparagine *tert*-butyl ester (**3a**)**

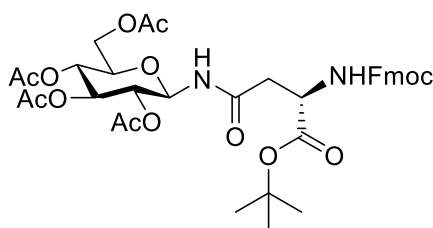

According to General Procedure C, **3a** was obtained from **2a** and Fmoc-*L*-Asp-*Ot*-Bu as a colorless solid. Yield: 91% (Procedure C1)/82% (Procedure C2).

**<sup>1</sup>H NMR** (400 MHz, CDCl<sub>3</sub>): δ = 7.75, 7.59 (d,  $J = 7.5$  Hz, 4H, Fmoc-H<sub>arom</sub>), 7.36–7.40, 7.26–7.33 (m, 4H, Fmoc-H<sub>arom</sub>), 6.41 (d,  $J = 9.0$  Hz, 1H, C-1-NH), 5.92 (dd,  $J = 8.6$  Hz, 1H, CHNH<sub>Fmoc</sub>), 5.27–5.34 (m, 1H, H-3), 5.20–5.25 (m, 1H, H-1), 5.02–5.08 (m,

1H, H-4), 4.88–4.94 (m, 1H, H-2), 4.45–4.53 (m, 1H, CHNHFmoc), 4.38–4.45 (m, 1H, Fmoc-CH), 4.25–4.34 (m, 2H, Fmoc-CH<sub>2</sub>, H-6a), 4.18–4.24 (m, 1H, Fmoc-CH<sub>2</sub>), 4.00–4.06 (m, 1H, H-6b), 3.78 (ddd,  $J = 6.2$  Hz,  $J = 4.2$  Hz,  $J = 2.1$  Hz, 1H, H-5), 2.65–2.89 (m, 2H, Asn-CH<sub>2</sub>), 2.06, 2.02, 2.01 (s, 12H, CH<sub>3</sub>), 1.44 (s, 9H, C(CH<sub>3</sub>)<sub>3</sub>).

<sup>13</sup>C NMR (101 MHz, CDCl<sub>3</sub>):  $\delta = 171.2, 170.7, 170.5, 169.9, 169.7, 169.5$  (AcC=O, <sup>t</sup>BuC=O, NHC=O), 156.1 (NHC=O), 143.9, 143.7 (C<sub>q,arom</sub>), 141.2, 141.3, 127.7, 127.1, 125.1, 120.0 (Fmoc-C<sub>arom</sub>), 82.5 (C(CH<sub>3</sub>)<sub>3</sub>), 78.1 (C-1), 73.7 (C-5), 72.6 (C-3), 70.6 (C-2), 68.0 (C-4), 67.2 (Fmoc-CH<sub>2</sub>), 61.5 (C-6), 51.0 (CHNHFmoc), 47.1 (Fmoc-CH), 38.0 (Asn-CH<sub>2</sub>), 27.9 (C(CH<sub>3</sub>)<sub>3</sub>), 20.7, 20.6, 20.5 (CH<sub>3</sub>).

$[\alpha]_D^{20} = +17.1$  ( $c = 1$ , CHCl<sub>3</sub>). Mass Anal. Calcd for C<sub>37</sub>H<sub>44</sub>N<sub>2</sub>O<sub>14</sub> [M+Na]<sup>+</sup>:  $m/z$  763.26847; HRMS found [M+Na]<sup>+</sup>:  $m/z$  763.26856.

***N*<sup>2</sup>-[(9*H*-Fluoren-9-ylmethoxy)carbonyl]-*N*-(2,3,4,6-tetra-*O*-acetyl- $\beta$ -D-galactopyranosyl)-L-asparagine-*tert*-butyl ester (3b)**

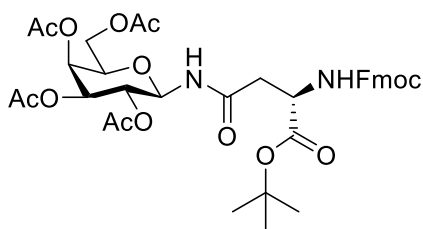

According to General Procedure C, **3b** was obtained from **2b** and Fmoc-L-Asp-*Ot*-Bu as a colorless solid. Yield: 92% (Procedure C1)/84% (Procedure C2).

<sup>1</sup>H NMR (400 MHz, CDCl<sub>3</sub>):  $\delta = 7.75, 7.59$  (d,  $J = 7.5$  Hz, 4H, Fmoc-H<sub>arom</sub>), 7.35–7.41, 7.26–7.33 (m, 4H, Fmoc-H<sub>arom</sub>), 6.41 (d,  $J = 9.0$  Hz, 1H, C-1-NH), 5.93 (dd,  $J = 8.6$  Hz, 1H, CHNHFmoc), 5.41 – 5.44 (m, 1H, H-3), 5.17–5.24 (m, 1H, H-1), 5.05–5.16 (m, 2H, H-4, H-2), 4.46–4.56 (m, 1H, CHNHFmoc), 4.42 (dd,  $J = 10.4$  Hz,  $J = 7.6$  Hz, 1H, Fmoc-CH<sub>2</sub>),

4.26–4.34 (m, 1H, Fmoc-CH<sub>2</sub>), 4.18–4.24 (m, 1H, Fmoc-CH), 4.04–4.16 (m, 2H, H-6a, H-6b), 3.97–4.04 (m, 1H, H-5), 2.86 (dd,  $J = 16.4$  Hz,  $J = 4.2$  Hz, 1H, Asn-CH<sub>2</sub>), 2.71 (dd,  $J = 16.4$  Hz,  $J = 4.0$  Hz, 1H, Asn-CH<sub>2</sub>), 2.12, 2.07, 2.01, 1.99 (s, 12H, CH<sub>3</sub>), 1.44 (s, 9H, C(CH<sub>3</sub>)<sub>3</sub>).

<sup>13</sup>C NMR (101 MHz, CDCl<sub>3</sub>):  $\delta = 171.5, 170.6, 170.3, 170.0, 169.8$  (AcC=O, <sup>t</sup>BuC=O, NHC=O), 156.1 (NHC=O), 143.9, 143.7, 141.3 (C<sub>q,arom</sub>), 127.7, 127.1, 125.1, 120.0 (Fmoc-C<sub>arom</sub>), 82.4 (C(CH<sub>3</sub>)<sub>3</sub>), 78.4 (C-1), 72.4 (C-5), 70.7, 68.3 (C-4, C-2), 67.2 (Fmoc-CH<sub>2</sub>), 67.1 (C-3), 61.1 (C-6), 51.0 (CHNHFmoc), 47.1 (Fmoc-CH), 38.0 (Asn-CH<sub>2</sub>), 27.8 (C(CH<sub>3</sub>)<sub>3</sub>), 20.7, 20.6, 20.6, 20.5 (CH<sub>3</sub>).

$[\alpha]_{\text{D}}^{20} = +11.5$  (c = 1, CHCl<sub>3</sub>). Mass Anal. Calcd for C<sub>37</sub>H<sub>44</sub>N<sub>2</sub>O<sub>14</sub> [M+Na]<sup>+</sup>: m/z 763.27; HRMS found [M+Na]<sup>+</sup>: m/z 763.26778.

***N*<sup>2</sup>-[(9*H*-Fluoren-9-ylmethoxy)carbonyl]-*N*-(2,3,4,6-tetra-*O*-acetyl- $\beta$ -*D*-mannopyranosyl)-*L*-asparagine-*tert*-butyl ester (**3c**)**

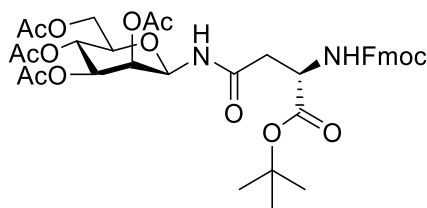

According to General Procedure C, **3c** was obtained from **2c** and Fmoc-*L*-Asp-*Ot*-Bu as a colorless solid. Yield: 77% (Procedure C1)/80% (Procedure C2).

<sup>1</sup>H NMR (400 MHz, CDCl<sub>3</sub>):  $\delta = 7.75, 7.58$  (d,  $J = 7.5$  Hz, 4H, Fmoc-H<sub>arom</sub>), 7.36–7.42, 7.27–7.33 (m, 4H, Fmoc-H<sub>arom</sub>), 6.48 (d,  $J = 9.1$  Hz, 1H, C-1-NH), 5.87 (d,  $J = 7.3$  Hz, 1H, CHNHFmoc), 5.49–5.55 (m, 1H, H-1), 5.36 (dd,  $J_{2,3} = 3.1$  Hz,  $J_{2,1} = 0.8$  Hz, 1H, H-2), 5.18–5.26 (m, 1H, H-4), 5.09 (dd,  $J_{3,4} = 10.1$  Hz,  $J_{3,2} = 3.3$  Hz, 1H, H-3), 4.35–4.46 (m, 2H,

Fmoc-CH<sub>2</sub>, CHNHFmoc), 4.25–4.35 (m, 2H, Fmoc-CH<sub>2</sub>, H-6a), 4.17–4.24 (m, 1H, Fmoc-CH), 3.99–4.06 (m, 1H, H-6b), 3.73 (ddd,  $J_{5,4} = 7.1$  Hz,  $J_{5,6} = 4.9$  Hz,  $J_{5,6} = 2.1$  Hz, 1H, H-5), 2.86 (d,  $J = 15.7$  Hz,  $J = 2.5$  Hz, 1H, Asn-CH<sub>2</sub>), 2.77 (dd,  $J = 16.4$  Hz,  $J = 3.8$  Hz, 1H, Asn-CH<sub>2</sub>), 2.23, 2.03, 2.02, 1.97 (s, 12H, CH<sub>3</sub>), 1.46 (s, 9H, C(CH<sub>3</sub>)<sub>3</sub>).

<sup>13</sup>C NMR (101 MHz, CDCl<sub>3</sub>):  $\delta = 170.6, 170.4, 169.9, 169.6, 169.6, 169.5$  (AcC=O, <sup>t</sup>BuC=O, NHC=O), 143.8, 143.7, 141.3 (C<sub>q,arom</sub>), 127.7, 127.1, 125.1, 120.0 (Fmoc-C<sub>arom</sub>), 82.9 (C(CH<sub>3</sub>)<sub>3</sub>), 75.9 (C-1), 74.2 (C-5), 71.5 (C-3), 69.9 (C-2), 67.3 (Fmoc-CH<sub>2</sub>), 65.0 (C-4), 62.1 (C-6), 51.0 (CHNHFmoc), 47.1 (Fmoc-CH), 38.6 (Asn-CH<sub>2</sub>), 27.9 (C(CH<sub>3</sub>)<sub>3</sub>), 20.9, 20.7, 20.7, 20.5 (CH<sub>3</sub>).

$[\alpha]_D^{20} = +1.2$  (c = 1, CHCl<sub>3</sub>). Mass Anal. Calcd for C<sub>37</sub>H<sub>44</sub>N<sub>2</sub>O<sub>14</sub> [M+Na]<sup>+</sup>: m/z 763.26847; HRMS found [M+Na]<sup>+</sup>: m/z 763.26842.

***N*²-[*(9H*-Fluoren-9-ylmethoxy)carbonyl]-*N*-(2,2',3,3',4,6,6'-hepta-*O*-acetyl- $\beta$ -D-cellobiosyl)-L-asparagine-*tert*-butyl ester (**3d**)**

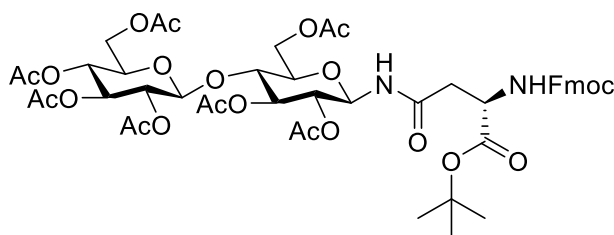

According to General Procedure C, **3d** was obtained from **2d** and Fmoc-L-Asp-*Ot*-Bu as a colorless solid. Yield: 61% (Procedure C1)/79% (Procedure C2).

<sup>1</sup>H NMR (400 MHz, CDCl<sub>3</sub>):  $\delta = 7.75, 7.58$  (d,  $J = 7.5$  Hz, 4H, Fmoc-H<sub>arom</sub>), 7.35–7.41, 7.26–7.32 (m, 4H, Fmoc-H<sub>arom</sub>), 6.33 (d,  $J = 8.9$  Hz, 1H, C-1-NH), 5.92 (d,  $J = 8.7$  Hz, 1H, CHNHFmoc), 5.23–5.31 (m, 1H, H-3), 5.14–5.20 (m, 1H, H-1), 5.05–5.14 (m, 1H, H-3'), 5.02–5.08 (m, 1H, H-4'), 4.91 (dd,  $J = 9.0$  Hz,  $J = 8.1$  Hz, 1H, H-2'), 4.79–4.85 (m, 1H, H-2),

4.39–4.50 (m, 4H, CHNHFmoc, Fmoc-CH<sub>2</sub>, H-1', H-6a'), 4.35 (dd,  $J = 12.5$  Hz,  $J = 4.4$  Hz, 1H, Fmoc-CH<sub>2</sub>), 4.25–4.32 (m, 1H, H-6b'), 4.18–4.24 (m, 1H, H-Fmoc-CH), 4.07–4.14 (m, 1H, H-6a), 4.03 (dd,  $J_{6b,6a} = 12.5$  Hz,  $J_{6b,5} = 2.1$  Hz, 1H, H-6b), 3.67–3.77 (m, 2H, H-4, H-5), 3.61–3.66 (m, 1H, H-5'), 2.81 (d,  $J = 16.5$  Hz,  $J = 4.3$  Hz, 1H, Asn-CH<sub>2</sub>), 2.68 (d,  $J = 16.3$  Hz,  $J = 3.8$  Hz, 1H, Asn-CH<sub>2</sub>), 2.07, 2.04, 2.02, 2.01, 1.99, 1.97 (s, 21H, CH<sub>3</sub>), 1.43 (s, 9H, C(CH<sub>3</sub>)<sub>3</sub>).

<sup>13</sup>C NMR (101 MHz, CDCl<sub>3</sub>):  $\delta = 171.4, 170.6, 170.5, 170.2, 169.7, 169.4, 169.3, 169.0$  (AcC=O, <sup>t</sup>BuC=O, NHC=O), 156.1 (NHC=O), 143.8, 143.7, 141.2 (C<sub>q,arom</sub>), 127.7, 127.0, 125.1, 120.0 (Fmoc-C<sub>arom</sub>), 100.6 (C-1'), 82.5 (C(CH<sub>3</sub>)<sub>3</sub>), 78.0 (C-1), 76.1 (C-5), 74.6 (C-4), 72.9 (C-3'), 72.0, 72.0 (C-3, C-5'), 71.5 (C-2'), 70.8 (C-2), 67.8 (C-4'), 67.2 (Fmoc-CH<sub>2</sub>), 61.7, 61.6 (C-6, C-6'), 51.0 (CHNHFmoc), 47.1 (Fmoc-CH), 38.0 (Asn-CH<sub>2</sub>), 27.8 (C(CH<sub>3</sub>)<sub>3</sub>), 20.8, 20.6, 20.5 (CH<sub>3</sub>).

$[\alpha]_D^{20} = + 1.0$  ( $c = 1$ , CHCl<sub>3</sub>). Mass Anal. Calcd for C<sub>49</sub>H<sub>60</sub>N<sub>2</sub>O<sub>22</sub> [M+Na]<sup>+</sup>:  $m/z$  1051.35299; HRMS found [M+Na]<sup>+</sup>:  $m/z$  1051.35278.

***N*<sup>2</sup>-[(9*H*-Fluoren-9-ylmethoxy)carbonyl]-*N*-(2,2',3,3',4',6,6'-hepta-*O*-acetyl- $\beta$ -D-lactosyl)-*L*-asparagine-*tert*-butyl ester (**3e**)**

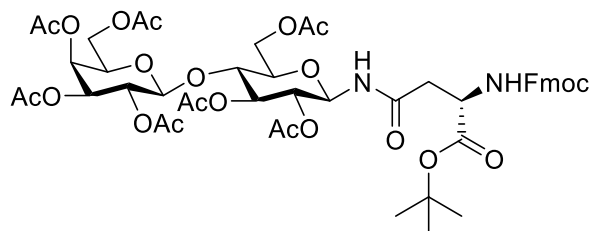

According to General Procedure C, **3e** was obtained from **2e** and Fmoc-L-Asp-O*t*-Bu as a colorless solid. Yield: 63% (Procedure C1)/61% (Procedure C2).

**<sup>1</sup>H NMR** (300 MHz, CDCl<sub>3</sub>): δ = 7.75, 7.58 (d, *J* = 7.3 Hz, 4H, Fmoc-H<sub>arom</sub>), 7.35–7.42, 7.26–7.33 (m, 4H, Fmoc-H<sub>arom</sub>), 6.33 (d, *J* = 9.0 Hz, 1H, C-1-NH), 5.82 (d, *J* = 8.4 Hz, 1H, CHNHFmoc), 5.34 (dd, *J*<sub>4',3'</sub> = 3.4 Hz, *J*<sub>4',5'</sub> = 0.7 Hz, 1H, H-4'), 5.25–5.32 (m, 1H, H-3), 5.13–5.22 (m, 1H, H-1), 5.09 (dd, *J*<sub>2',3'</sub> = 10.4 Hz, *J*<sub>2',1'</sub> = 7.8 Hz, 1H, H-2'), 4.93 (dd, *J*<sub>3',2'</sub> = 10.5 Hz, *J*<sub>3',4'</sub> = 3.4 Hz, 1H, H-3'), 4.77–4.86 (m, 1H, H-2), 4.35–4.52 (m, 4H, CHNHFmoc, H-6a, Fmoc-CH<sub>2</sub>, H-1'), 4.25–4.34 (m, 1H, Fmoc-CH<sub>2</sub>), 4.22 (dd, *J* = 14.2 Hz, *J* = 7.1 Hz, 1H, Fmoc-CH), 4.01–4.16 (m, 3H, H-6b, H-6a', H-6b'), 3.81–3.89 (m, 1H, H-5'), 3.65–3.80 (m, 2H, H-5, H-4), 2.83 (dd, *J* = 16.3 Hz, *J* = 4.2 Hz, 1H, Asn-CH<sub>2</sub>), 2.66 (dd, *J* = 16.1 Hz, *J* = 3.9 Hz, 1H, Asn-CH<sub>2</sub>), 2.14, 2.06, 2.05, 2.04, 2.03, 1.95 (s, 21H, CH<sub>3</sub>), 1.43 (s, 9H, C(CH<sub>3</sub>)<sub>3</sub>).

**<sup>13</sup>C NMR** (75 MHz, CDCl<sub>3</sub>): δ = 171.4, 170.6, 170.3, 170.3, 170.1, 170.1, 169.3, 169.0 (AcC=O, <sup>t</sup>BuC=O, NHC=O), 156.1 (NHC=O), 143.9, 143.7, 141.3 (C<sub>q,arom</sub>), 127.7, 127.1, 125.1, 120.0 (Fmoc-C<sub>arom</sub>), 100.9 (C-1'), 82.5 (C(CH<sub>3</sub>)<sub>3</sub>), 78.0 (C-1), 75.9 (C-4), 74.6 (C-5), 72.2 (C-3), 71.0, 70.9 (C-2, C-3'), 70.7 (C-4'), 69.0 (C-2'), 67.2 (Fmoc-CH<sub>2</sub>), 66.6 (C-4'), 61.9 (C-6), 60.8 (C-6'), 51.0 (CHNHFmoc), 47.1 (Fmoc-CH), 38.0 (Asn-CH<sub>2</sub>), 27.8 (C(CH<sub>3</sub>)<sub>3</sub>), 20.8, 20.7, 20.6, 20.6, 20.5 (CH<sub>3</sub>).

[α]<sub>D</sub><sup>20</sup> = + 6.3 (c = 1, CHCl<sub>3</sub>). **Mass Anal.** Calcd for C<sub>49</sub>H<sub>60</sub>N<sub>2</sub>O<sub>22</sub> [M+Na]<sup>+</sup>: m/z 1051.35299; HRMS found [M+Na]<sup>+</sup>: m/z 1051.35263.

***N*<sup>2</sup>-[(9*H*-Fluoren-9-ylmethoxy)carbonyl]-*N*-(2,2',3,3',4,6,6'-hepta-*O*-acetyl- $\beta$ -D-maltosyl)-*L*-asparagine-*tert*-butyl ester (**3f**)**

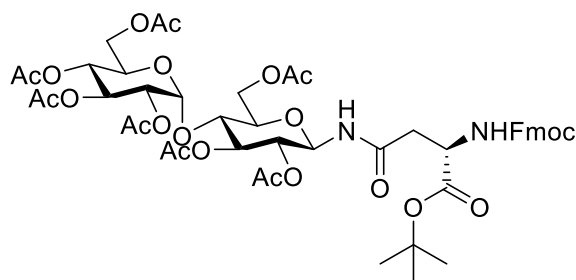

According to General Procedure C, **3f** was obtained from **2f** and Fmoc-*L*-Asp-*Ot*-Bu as a colorless solid. Yield: 56% (Procedure C1)/86% (Procedure C2).

**<sup>1</sup>H NMR** (400 MHz, CDCl<sub>3</sub>):  $\delta$  = 7.75, 7.59 (d,  $J$  = 7.5 Hz, 4H, Fmoc-H<sub>arom</sub>), 7.35–7.42, 7.27–7.32 (m, 4H, Fmoc-H<sub>arom</sub>), 6.29 (d,  $J$  = 9.3 Hz, 1H, C-1-NH), 5.94 (d,  $J$  = 8.4 Hz, 1H, CHNH<sub>Fmoc</sub>), 5.38 (d,  $J_{1',2'}$  = 4.2 Hz, 1H, H-1'), 5.31–5.37 (m, 2H, H-3, H-3'), 5.20–5.28 (m, 1H, H-1), 5.01–5.08 (m, 1H, H-4'), 4.85 (dd,  $J_{2',3'}$  = 10.5 Hz,  $J_{2',1'}$  = 4.0 Hz, 1H, H-2'), 4.71–4.78 (m, 1H, H-2), 4.44–4.51 (m, 1H, CHNH<sub>Fmoc</sub>), 4.36–4.43 (m, 2H, Fmoc-CH<sub>2</sub>, H-6a), 4.26–4.34 (dd,  $J$  = 10.2 Hz,  $J$  = 7.2 Hz, 1H, Fmoc-CH<sub>2</sub>), 4.17–4.24 (m, 3H, Fmoc-CH, H-6b, H-6a'), 4.02 (dd,  $J_{6b',6a'}$  = 12.4 Hz,  $J_{6b',5'}$  = 1.5 Hz, 1H, H-6b'), 3.93–3.99 (m, 1H, H-4), 3.87–3.93 (m, 1H, H-5'), 3.76 (ddd,  $J_{5,4}$  = 9.5 Hz,  $J_{5,6}$  = 3.7 Hz,  $J_{5,6}$  = 2.5 Hz, 1H, H-5), 2.81 (dd,  $J$  = 16.4 Hz,  $J$  = 3.9 Hz, 1H, Asn-CH<sub>2</sub>), 2.69 (dd,  $J$  = 16.5 Hz,  $J$  = 3.9 Hz, 1H, Asn-CH<sub>2</sub>), 2.08, 2.05, 2.03, 2.01, 1.99 (s, 21H, CH<sub>3</sub>), 1.43 (s, 9H, C(CH<sub>3</sub>)<sub>3</sub>).

**<sup>13</sup>C NMR** (101 MHz, CDCl<sub>3</sub>):  $\delta$  = 171.2, 170.7, 170.5, 170.4, 169.9, 169.7, 169.5 (AcC=O, <sup>t</sup>BuC=O, NHC=O), 156.1 (NHC=O), 143.8, 143.7, 141.2 (C<sub>q,arom</sub>), 127.7, 127.1, 125.1, 120.0 (Fmoc-C<sub>arom</sub>), 95.6 (C-1'), 82.5 (C(CH<sub>3</sub>)<sub>3</sub>), 77.6 (C-1), 74.9 (C-3), 74.0 (C-5), 72.4 (C-4), 71.3 (C-2), 69.9 (C-2'), 69.3 (C-3'), 68.6 (C-5'), 67.9 (C-4'), 67.2 (Fmoc-CH<sub>2</sub>), 62.6 (C-6), 61.4 (C-6'), 50.9 (CHNH<sub>Fmoc</sub>), 47.1 (Fmoc-CH), 38.0 (Asn-CH<sub>2</sub>), 27.8 (C(CH<sub>3</sub>)<sub>3</sub>), 20.9, 20.8, 20.7, 20.6 (CH<sub>3</sub>).



$[\alpha]_D^{20} = + 65.2$  ( $c = 1$ ,  $\text{CHCl}_3$ ). **Mass Anal.** Calcd for  $\text{C}_{49}\text{H}_{60}\text{N}_2\text{O}_{22}$   $[\text{M}+\text{Na}]^+$ :  $m/z$  1051.35299; HRMS found  $[\text{M}+\text{Na}]^+$ :  $m/z$  1051.35262.

***N*<sup>2</sup>-[*N*<sup>2</sup>-[(9*H*-Fluoren-9-ylmethoxy)carbonyl]phenylalaninyl]-*N*-(2,3,4,6-tetra-*O*-acetyl- $\beta$ -*D*-glucopyranosyl)-*L*-asparagine-*tert*-butyl ester (**4a**)**

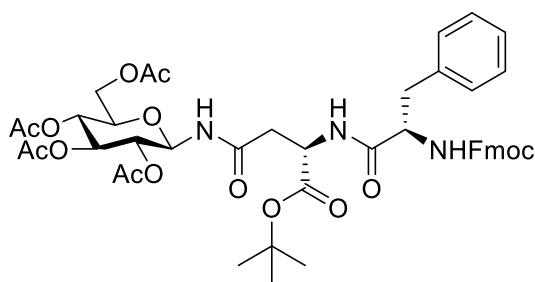

According to General Procedure D, **4a** was obtained from **3a** and Fmoc-*L*-Phe-OH as a colorless solid. Yield: 81% (Procedure D1)/76% (Procedure D2).

**<sup>1</sup>H NMR** (400 MHz,  $\text{CDCl}_3$ ):  $\delta = 7.74$  (d,  $J = 7.6$  Hz, 2H, Fmoc- $\text{H}_{\text{arom}}$ ), 7.48–7.57, 7.36–7.40 (m, 4H, Fmoc- $\text{H}_{\text{arom}}$ ), 7.26–7.31 (m, 4H, Fmoc- $\text{H}_{\text{arom}}$ , Ph- $\text{H}_{\text{arom}}$ ), 7.18–7.24 (m, 3H, Ph- $\text{H}_{\text{arom}}$ ), 7.05 (d,  $J = 7.2$  Hz, 1H, CHNHPhe), 6.57 (d,  $J = 8.8$  Hz, 1H, C-1-NH), 5.46 (d,  $J = 6.8$  Hz, 1H, CHNHAsn), 5.21–5.30 (m, 1H, H-3), 5.1–5.16 (m, 1H, H-1), 4.97–5.02 (m, 1H, H-4), 4.89–4.96 (m, 1H, H-2), 4.60–4.66 (m, 1H, CHNHFmoc), 4.47–4.53 (m, 1H, CHNHAsn), 4.35–4.43 (m, 1H, Fmoc- $\text{CH}_2$ ), 4.25–4.35 (m, 2H, Fmoc- $\text{CH}_2$ , H-6a), 4.14–4.19 (m, 1H, Fmoc-CH), 3.97–3.97 (dd,  $J_{6b,6a} = 12.4$  Hz,  $J = 1.5$  Hz, 1H, H-6b), 3.68–3.72 (m, 1H, H-5), 3.20 (dd,  $J = 12.7$  Hz,  $J = 2.0$  Hz, 1H, Asn- $\text{CH}_2$ ) 2.99 (dd,  $J = 13.0$  Hz,  $J = 8.1$  Hz, 1H, Asn- $\text{CH}_2$ ), 2.77 (dd,  $J = 15.8$  Hz,  $J = 3.9$  Hz, 1H, Phe- $\text{CH}_2$ ), 2.69 (dd,  $J = 16.1$  Hz,  $J = 4.2$  Hz, 1H, Phe- $\text{CH}_2$ ), 2.04, 2.02, 1.98 (s, 12H,  $\text{CH}_3$ ), 1.43 (s, 9H,  $\text{C}(\text{CH}_3)_3$ ).

**<sup>13</sup>C NMR** (101 MHz,  $\text{CDCl}_3$ ):  $\delta = 170.9$ , 170.7, 170.4, 169.9, 169.5, 169.0 (AcC=O,  $\text{tBuC=O}$ , NHC=O), 155.9 (NHC=O), 143.8, 141.2, 136.1 ( $\text{C}_{\text{q,arom}}$ ), 129.3, 128.7 (Ph- $\text{C}_{\text{arom}}$ ), 127.7 (Fmoc- $\text{C}_{\text{arom}}$ ), 127.1 (Ph- $\text{C}_{\text{arom}}$ ), 125.1, 119.9 (Fmoc- $\text{C}_{\text{arom}}$ ), 82.7 ( $\text{C}(\text{CH}_3)_3$ ), 78.1 (C-1), 73.8

(C-5), 72.7 (C-3), 70.4 (C-2), 68.2 (C-4), 67.0 (Fmoc-CH<sub>2</sub>), 61.4 (C-6), 56.0 (CHNHAsn), 49.5 (CHNHFmoc), 47.1 (Fmoc-CH), 37.9 (Asn-CH<sub>2</sub>), 37.7 (Phe-CH<sub>2</sub>), 27.8 (C(CH<sub>3</sub>)<sub>3</sub>), 20.7, 20.6, 20.6, 20.5 (CH<sub>3</sub>).

$[\alpha]_D^{20} = + 2.9$  ( $c = 1$ , CHCl<sub>3</sub>). **Mass Anal.** Calcd for C<sub>46</sub>H<sub>53</sub>N<sub>3</sub>O<sub>15</sub> [M+Na]<sup>+</sup>:  $m/z$  910.33689; HRMS found [M+Na]<sup>+</sup>:  $m/z$  910.33544. **Anal.** Calcd for C<sub>49</sub>H<sub>60</sub>N<sub>2</sub>O<sub>22</sub> C: 62.22%, H: 6.02%, N: 4.73%; found C: 61.81%, H: 6.03%, N: 4.76%.

***N*<sup>2</sup>-[*N*<sup>2</sup>-[(9*H*-Fluoren-9-ylmethoxy)carbonyl]phenylalaninyl]-*N*-(2,3,4,6-tetra-*O*-acetyl-β-*D*-galactopyranosyl)-*L*-asparagine-*tert*-butyl ester (**4b**)**

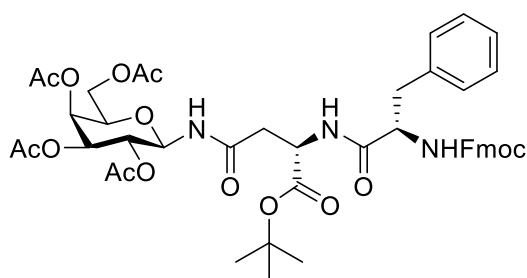

According to General Procedure D, **4b** was obtained from **3b** and Fmoc-L-Phe-OH as a colorless solid. Yield: 67% (Procedure D1)/73% (Procedure D2).

**<sup>1</sup>H NMR** (400 MHz, CDCl<sub>3</sub>):  $\delta = 7.74$  (d,  $J = 7.6$  Hz, 2H, Fmoc-H<sub>arom</sub>), 7.48–7.57, 7.34–7.41 (m, 4H, Fmoc-H<sub>arom</sub>), 7.25–7.31 (m, 4H, Fmoc-H<sub>arom</sub>, Ph-H<sub>arom</sub>), 7.19–7.25 (m, 3H, Ph-H<sub>arom</sub>), 7.11 (d,  $J = 6.6$  Hz, 1H, CHNHFmoc), 6.60–6.69 (m, 1H, C-1-NH), 5.53 (d,  $J = 7.5$  Hz, 1H, CHNHAsn), 5.35–5.39 (m, 1H, H-3), 5.03–5.16 (m, 3H, H-1, H-2, H-4), 4.60–4.70 (m, 1H, CHNHFmoc), 4.44–4.54 (m, 1H, CHNHAsn), 4.35–4.43 (m, 1H, Fmoc-CH<sub>2</sub>), 4.19–4.33 (m, 2H, Fmoc-CH<sub>2</sub>, H-6a), 4.14–4.19 (m, 1H, Fmoc-CH), 3.99 (dd,  $J_{6b,6a} = 11.3$  Hz,  $J_{6b,5} = 5.7$  Hz, 1H, H-6b), 3.86–3.93 (m, 1H, H-5), 3.21 (dd,  $J = 12.8$  Hz,  $J = 2.9$  Hz, 1H, Asn-CH<sub>2</sub>), 2.99 (dd,  $J = 13.0$  Hz,  $J = 8.6$  Hz, 1H, Asn-CH<sub>2</sub>), 2.67–2.83 (m, 2H, Phe-CH<sub>2</sub>), 2.06, 2.02, 1.96, 1.94 (s, 12H, CH<sub>3</sub>), 1.44 (s, 9H, C(CH<sub>3</sub>)<sub>3</sub>).

$^{13}\text{C}$  NMR (101 MHz,  $\text{CDCl}_3$ ):  $\delta$  = 171.1, 170.9, 170.8, 170.6, 170.1, 169.8, 169.1 (AcC=O,  $^t\text{BuC=O}$ , NHC=O), 155.9 (NHC=O), 143.8, 143.7, 141.2, 136.4 ( $\text{C}_{\text{q,arom}}$ ), 129.3, 128.6 (Ph- $\text{C}_{\text{arom}}$ ), 127.6 (Fmoc- $\text{C}_{\text{arom}}$ ), 127.0 (Ph- $\text{C}_{\text{arom}}$ , Fmoc- $\text{C}_{\text{arom}}$ ), 125.1, 119.9 (Fmoc- $\text{C}_{\text{arom}}$ ), 82.7 ( $\text{C}(\text{CH}_3)_3$ ), 78.5 (C-1), 72.6 (C-5), 70.8, 68.1 (C-4, C-2), 67.2 (C-3), 67.0 (Fmoc- $\text{CH}_2$ ), 61.2 (C-6), 56.2 (CHNHAsn), 49.7 (CHNHFmoc), 47.1 (Fmoc-CH), 38.2 (Asn- $\text{CH}_2$ ), 37.9 (Phe- $\text{CH}_2$ ), 27.9 ( $\text{C}(\text{CH}_3)_3$ ), 20.7, 20.7, 20.5, 20.3 ( $\text{CH}_3$ ).

$[\alpha]_{\text{D}}^{20}$  = + 14.7 ( $c$  = 1,  $\text{CHCl}_3$ ). **Mass Anal.** Calcd for  $\text{C}_{46}\text{H}_{53}\text{N}_3\text{O}_{15}$   $[\text{M}+\text{Na}]^+$ :  $m/z$  910.33689; HRMS found  $[\text{M}+\text{Na}]^+$ :  $m/z$  910.33750. **Anal.** Calcd for  $\text{C}_{49}\text{H}_{60}\text{N}_2\text{O}_{22}$  C: 62.22%, H: 6.02%, N: 4.73%; found C: 62.13%, H: 6.24%, N: 4.58%.

***N*<sup>2</sup>-[*N*<sup>2</sup>-[(9*H*-Fluoren-9-ylmethoxy)carbonyl]phenylalaninyl]-*N*-(2,3,4,6-tetra-*O*-acetyl- $\beta$ -*D*-mannopyranosyl)-*L*-asparagine-*tert*-butyl ester (**4c**)**

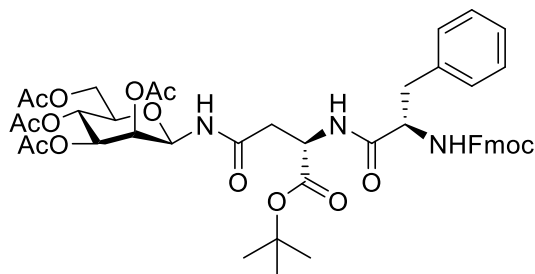

According to General Procedure D, **4c** was obtained from **3c** and Fmoc-*L*-Phe-OH as a colorless solid. Yield: 72% (Procedure D1)/80% (Procedure D2).

$^1\text{H}$  NMR (400 MHz,  $\text{CDCl}_3$ ):  $\delta$  = 7.74 (d,  $J$  = 7.6 Hz, 2H, Fmoc- $\text{H}_{\text{arom}}$ ), 7.47–7.54, 7.34–7.43 (m, 4H, Fmoc- $\text{H}_{\text{arom}}$ ), 7.26–7.32 (m, 4H, Fmoc- $\text{H}_{\text{arom}}$ , Ph- $\text{H}_{\text{arom}}$ ), 7.18–7.24 (m, 3H, Ph- $\text{H}_{\text{arom}}$ ), 7.12 (d,  $J$  = 7.5 Hz, 1H, CHNHAsn), 6.82 (d,  $J$  = 7.6 Hz, 1H, C-1-NH), 5.60 (d,  $J$  = 6.9 Hz, 1H, CHNHFmoc), 5.44 (dd,  $J_{1,\text{NH}}$  = 9.2 Hz,  $J_{1,2}$  = 0.7 Hz, 1H, H-1), 5.34 (dd,  $J_{2,3}$  = 3.2 Hz,  $J_{2,1}$  = 1.0 Hz, 1H, H-2), 5.17–5.25 (m, 1H, H-4), 5.09 (dd,  $J_{3,4}$  = 10.1 Hz,  $J_{3,2}$  = 3.3 Hz, 1H,

H-3), 4.46–4.59 (m, 2H, H-CHNHFmoc, CHNHAsn), 4.39 (dd,  $J = 10.5$  Hz,  $J = 7.0$  Hz, 2H, Fmoc-CH<sub>2</sub>, H-6a), 4.20–4.30 (m, 1H, Fmoc-CH<sub>2</sub>), 4.12–4.18 (m, 1H, Fmoc-CH), 4.03 (dd,  $J_{6b,6a} = 12.4$  Hz,  $J_{6b,5} = 1.9$  Hz, 1H, H-6b), 3.71 (ddd,  $J_{5,4} = 9.7$  Hz,  $J_{5,6a} = 5.1$  Hz,  $J_{5,6b} = 1.7$  Hz, 1H, H-5), 3.21 (dd,  $J = 13.0$  Hz,  $J = 5.3$  Hz, 1H, Asn-CH<sub>2</sub>), 3.01 (dd,  $J = 12.6$  Hz,  $J = 8.7$  Hz, 1H, Asn-CH<sub>2</sub>), 2.69–2.85 (m, 2H, Phe-CH<sub>2</sub>), 2.19 2.04, 1.98, 1.97 (s, 12H, CH<sub>3</sub>), 1.43 (s, 9H, C(CH<sub>3</sub>)<sub>3</sub>)

<sup>13</sup>C NMR (101 MHz, CDCl<sub>3</sub>):  $\delta = 171.5, 170.9, 170.5, 169.9, 169.9, 169.6, 169.3, 169.0$  (AcC=O, <sup>t</sup>BuC=O, NHC=O), 156.0 (NHC=O), 143.5, 143.3, 141.3 (C<sub>q,arom</sub>), 129.2, 128.7 (Ph-C<sub>arom</sub>), 127.7 (Fmoc-C<sub>arom</sub>), 127.1 (Ph-C<sub>arom</sub>), 125.1, 120.0 (Fmoc-C<sub>arom</sub>), 83.2 (C(CH<sub>3</sub>)<sub>3</sub>), 76.2 (C-1), 74.5 (C-5), 71.5 (C-3), 69.7 (C-2), 67.1 (Fmoc-CH<sub>2</sub>), 65.2 (C-4), 65.1, 61.9 (C-6), 55.9 (CHNHAsn), 49.7 (CHNHFmoc), 47.1 (Fmoc-CH), 38.3, 38.2 (Phe-CH<sub>2</sub>, Asn-CH<sub>2</sub>), 27.8 (C(CH<sub>3</sub>)<sub>3</sub>), 20.9, 20.7, 20.6, 20.5 (CH<sub>3</sub>).

$[\alpha]_D^{20} = -13.6$  ( $c = 1$ , CHCl<sub>3</sub>). **Mass Anal.** Calcd for C<sub>46</sub>H<sub>53</sub>N<sub>3</sub>O<sub>15</sub> [M+Na]<sup>+</sup>:  $m/z$  910.33689; HRMS found [M+Na]<sup>+</sup>:  $m/z$  910.33802. **Anal.** Calcd for C<sub>49</sub>H<sub>60</sub>N<sub>2</sub>O<sub>22</sub> C: 62.22%, H: 6.02%, N: 4.73%; found C: 62.02%, H: 6.21%, N: 4.67%.

***N*<sup>2</sup>-[*N*<sup>2</sup>-[(9*H*-Fluoren-9-ylmethoxy)carbonyl]phenylalaninyl]-*N*-(2,2',3,3',4,6,6'-hepta-*O*- $\beta$ -D-cellobiosyl)-L-asparagine-*tert*-butyl ester (4d)**

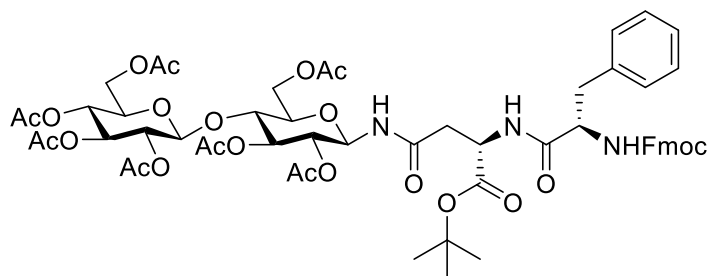

According to General Procedure D, **4d** was obtained from **3d** and Fmoc-L-Phe-OH as a colorless solid. Yield: 68% (Procedure D1)/80% (Procedure D2).

**<sup>1</sup>H NMR** (400 MHz, CDCl<sub>3</sub>): δ = 7.74 (d, *J* = 7.6 Hz, 2H, Fmoc-H<sub>arom</sub>), 7.53 (dd, *J* = 17.2 Hz, *J* = 7.1 Hz, 2H, Fmoc-H<sub>arom</sub>), 7.35–7.41 (m, 2H, Fmoc-H<sub>arom</sub>), 7.25–7.31 (m, 4H, Fmoc-H<sub>arom</sub>, Ph-H<sub>arom</sub>), 7.19–7.25 (m, 3H, Ph-H<sub>arom</sub>), 7.09 (d, *J* = 6.6 Hz, 1H, CHNHFmoc), 6.56 (d, *J* = 8.7 Hz, 1H, C-1-NH), 5.56 (d, *J* = 7.5 Hz, 1H, CHNHAsn), 5.17–5.24 (m, 1H, H-3), 4.99–5.14 (m, 3H, H-3', H-4', H-1), 4.80–4.94 (m, 2H, H-2', H-2), 4.56–4.64 (m, 1H, CHNHFmoc), 4.48–4.55 (m, 1H, CHNHAsn), 4.42 (d, *J*<sub>1',2'</sub> = 7.9 Hz, 1H, H-1'), 4.34–4.39 (m, 1H, Fmoc-CH<sub>2</sub>), 4.21–4.34 (m, 4H, H-6a', H-6a, H-6b, Fmoc-CH<sub>2</sub>), 4.14–4.20 (m, 1H, Fmoc-CH), 3.90 (d, *J* = 12.2 Hz, 1H, H-6b'), 3.54–3.67 (m, 3H, H-4, H-5, H5'), 3.22 (dd, *J* = 13.7 Hz, *J* = 3.9 Hz, 1H, Asn-CH<sub>2</sub>), 2.96 (dd, *J* = 13.3 Hz, *J* = 7.8 Hz, 1H, Asn-CH<sub>2</sub>), 2.68–2.78 (m, 2H, Phe-CH<sub>2</sub>), 2.07, 2.03, 2.00, 1.99, 1.97, 1.92 (s, 21H, CH<sub>3</sub>), 1.43 (m, 9H, C(CH<sub>3</sub>)<sub>3</sub>).

**<sup>13</sup>C NMR** (101 MHz, CDCl<sub>3</sub>): δ = 171.1, 171.0, 170.8, 170.5, 170.4, 170.2, 169.4, 169.3, 169.0, 168.9 (AcC=O, <sup>t</sup>BuC=O, NHC=O), 156.0 (NHC=O), 143.8, 143.8, 141.2, 141.2, 136.4 (C<sub>q,arom</sub>), 129.3, 128.6 (Ph-C<sub>arom</sub>), 127.7 (Fmoc-C<sub>arom</sub>), 127.1 127.0 (Ph-C<sub>arom</sub>, Fmoc-C<sub>arom</sub>), 125.2, 119.9 (Fmoc-C<sub>arom</sub>), 100.7 (C-1'), 82.8 (C(CH<sub>3</sub>)<sub>3</sub>), 78.0 (C-1), 76.5 (C-4), 74.9 (C-5), 72.8 (C-3'), 72.2 (C-3), 72.0 (C-5'), 71.5, 70.6 (C-2, C-2'), 67.7 (C-4'), 67.1 (Fmoc-CH<sub>2</sub>), 61.6, 61.4 (C-6, C-6'), 56.0 (CHNHAsn), 49.8 (CHNHFmoc), 47.1 (Fmoc-CH), 38.3 (Asn-CH<sub>2</sub>), 38.1 (Phe-CH<sub>2</sub>), 27.9 (C(CH<sub>3</sub>)<sub>3</sub>), 20.8, 20.6, 20.6, 20.5, 20.5, 20.4 (CH<sub>3</sub>).

[α]<sub>D</sub><sup>20</sup> = 1.0 (c = 1, CHCl<sub>3</sub>). **Mass Anal.** Calcd for C<sub>58</sub>H<sub>69</sub>N<sub>3</sub>O<sub>23</sub> [M+Na]<sup>+</sup>: m/z 1198.42141; HRMS found [M+Na]<sup>+</sup>: m/z 1198.42140.

***N*<sup>2</sup>-[*N*<sup>2</sup>-[(9*H*-Fluoren-9-ylmethoxy)carbonyl]phenylalaninyl]-*N*-(2,2',3,3',4,6,6'-hepta-*O*- $\beta$ -D-lactosyl)-L-asparagine-*tert*-butyl ester (**4e**)**

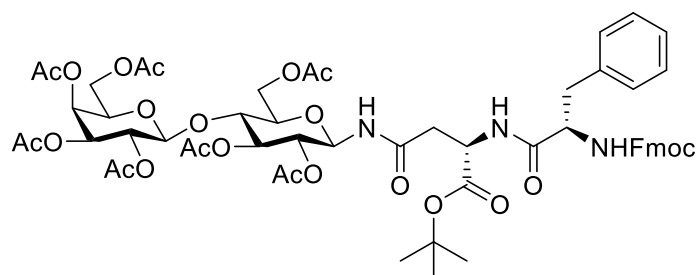

According to General Procedure D, **4e** was obtained from **3e** and Fmoc-L-Phe-OH as a colorless solid. Yield: 76% (Procedure D1)/79% (Procedure D2).

**<sup>1</sup>H NMR** (400 MHz, CDCl<sub>3</sub>):  $\delta$  = 7.74 (d,  $J$  = 7.5 Hz, 2H, Fmoc-H<sub>arom</sub>), 7.53 (dd,  $J$  = 15.9 Hz,  $J$  = 7.2 Hz 2H, Fmoc-H<sub>arom</sub>), 7.35–7.41 (m, 2H, Fmoc-H<sub>arom</sub>), 7.25–7.31 (m, 5H, Fmoc-H<sub>arom</sub>, Ph-H<sub>arom</sub>), 7.19–7.24 (m, 3H, Ph-H<sub>arom</sub>), 7.10 (d,  $J$  = 6.7 Hz, 1H, CHNH<sub>Fmoc</sub>), 6.57 (d,  $J$  = 8.8 Hz, 1H, C-1-NH), 5.56 (d,  $J$  = 7.5 Hz, 1H, CHNH<sub>Asn</sub>), 5.31 (dd,  $J_{4',3'} = 3.5$  Hz,  $J_{4',5'} = 0.6$  Hz, 1H, H-4'), 5.19–5.26 (m, 1H, H-3), 5.04–5.11 (m, 2H, H-1, H-2'), 4.92 (dd,  $J_{3',2'} = 10.4$  Hz,  $J_{3',4'} = 3.4$  Hz, 1H, H-3'), 4.80–4.87 (m, 1H, H-2), 4.57–4.64 (m, 1H, CHNH<sub>Fmoc</sub>), 4.46–4.55 (m, 1H, CHNH<sub>Asn</sub>), 4.39 (d,  $J$  = 7.9 Hz, 1H, H-1'), 4.21–4.38 (m, 4H, Fmoc-CH<sub>2</sub>, H-6a, H-6b), 4.14–4.19 (m, 1H, Fmoc-CH), 4.00–4.05 (m, 2H, H-6a', H-6b'), 3.77–3.82 (m, 1H, H-5'), 3.63–3.69 (m, 1H, H-4), 3.58–3.63 (m, 1H, H-5), 3.22 (dd,  $J$  = 13.7 Hz,  $J$  = 4.5 Hz, 1H, Asn-CH<sub>2</sub>), 2.96 (dd,  $J$  = 13.3 Hz,  $J$  = 8.4 Hz, 1H, Asn-CH<sub>2</sub>), 2.67–2.80 (m, 2H, Phe-CH<sub>2</sub>), 2.13, 2.06, 2.03, 2.02, 2.01, 1.95 (s, 21H, CH<sub>3</sub>), 1.43 (s, 9H, C(CH<sub>3</sub>)<sub>3</sub>).

**<sup>13</sup>C NMR** (101 MHz, CDCl<sub>3</sub>):  $\delta$  = 171.1, 171.0, 170.8, 170.5, 170.3, 170.1, 170.1, 169.4, 169.0, 168.9 (AcC=O, <sup>t</sup>BuC=O, NHC=O), 156.0 (NHC=O), 143.8, 141.2, 141.2, 136.4 (C<sub>q,arom</sub>), 129.3, 128.6 (Ph-C<sub>arom</sub>), 127.7 (Fmoc-C<sub>arom</sub>), 127.0 (Fmoc-C<sub>arom</sub>, Ph-C<sub>arom</sub>), 125.2, 119.9 (Fmoc-C<sub>arom</sub>), 100.9 (C-I), 82.7 (C(CH<sub>3</sub>)<sub>3</sub>), 77.9 (C-1), 76.2 (C-4), 74.9 (C-5), 72.5 (C-3), 70.9

(C-3'), 70.7, 70.7 (C-2, C-5'), 69.0 (C-2'), 67.1 (Fmoc-CH<sub>2</sub>), 66.5 (C-4'), 61.7 (C-6), 60.8 (C-6'), 56.0 (CHNHAsn), 49.7 (CHNHFmoc), 47.0 (Fmoc-CH), 38.3 (Asn-CH<sub>2</sub>), 38.0 (Phe-CH<sub>2</sub>), 27.8 (C(CH<sub>3</sub>)<sub>3</sub>), 20.8, 20.6, 20.6, 20.6, 20.5 (CH<sub>3</sub>).

$[\alpha]_D^{20} = + 3.2$  (c = 1, CHCl<sub>3</sub>). **Mass Anal.** Calcd for C<sub>58</sub>H<sub>69</sub>N<sub>3</sub>O<sub>23</sub> [M+Na]<sup>+</sup>: m/z 1198.42141; HRMS found [M+Na]<sup>+</sup>: m/z 1198.42103. **Anal.** Calcd for C<sub>58</sub>H<sub>69</sub>N<sub>3</sub>O<sub>23</sub> C: 59.23%, H: 5.91%, N: 3.57%; found C: 59.13%, H: 6.13%, N: 3.30%.

***N*<sup>2</sup>-[*N*<sup>2</sup>-[(9*H*-Fluoren-9-ylmethoxy)carbonyl]phenylalaninyl]-*N*-(2,2',3,3',4,6,6'-hepta-*O*-β-*D*-maltosyl)-*L*-asparagine-*tert*-butyl ester (**4f**)**

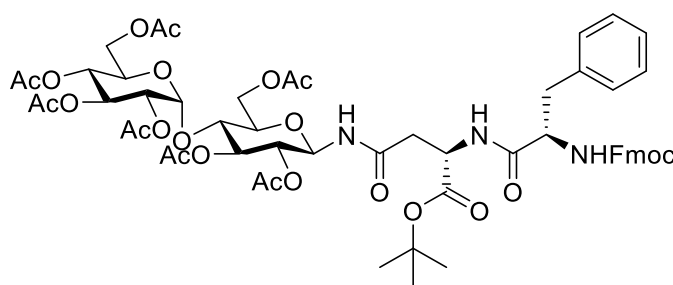

According to General Procedure D, **4f** was obtained from **3f** and Fmoc-*L*-Phe-OH as a colorless solid. Yield: 78% (Procedure D1)/67% (Procedure D2).

**<sup>1</sup>H NMR** (300 MHz, CDCl<sub>3</sub>): δ = 7.75 (d, *J* = 7.5 Hz, 2H, Fmoc-H<sub>arom</sub>), 7.49–7.58 (m, 2H, Fmoc-H<sub>arom</sub>), 7.39 (td, *J* = 7.2 Hz, *J* = 3.5 Hz, 2H, Fmoc-H<sub>arom</sub>), 7.26–7.32 (m, 4H, Ph-H<sub>arom</sub>, Fmoc-H<sub>arom</sub>), 7.17–7.24 (m, 3H, Ph-H<sub>arom</sub>), 7.11 (d, *J* = 7.4 Hz, 1H, CHNHFmoc), 6.52 (d, *J* = 9.1 Hz, 1H, C-1-NH), 5.53 (d, *J* = 8.9 Hz, 1H, CHNHAsn), 5.25–5.39 (m, 3H, H-1', H-3', H-3), 5.08–5.17 (m, 1H, H-1), 5.00–5.08 (m, 1H, H-4'), 4.84 (dd, *J*<sub>2',3'</sub> = 10.5 Hz, *J*<sub>2',1'</sub> = 4.0 Hz, 1H, H-2'), 4.72–4.80 (m, 1H, H-2), 4.55–4.64 (m, 1H, CHNHFmoc), 4.43–4.55 (m, 1H, CHNHAsn), 4.28–4.43 (m, 3H, H-6a, Fmoc-CH<sub>2</sub>), 4.14–4.28 (m, 3H, H-6b, H-6a', Fmoc-CH), 4.03 (dd, *J*<sub>6b',6a'</sub> = 12.4 Hz, *J*<sub>6b',5</sub> = 2.1 Hz, 1H, H-6b'), 3.84–3.94 (m, 2H, H-4,

H-5'), 3.59–3.69 (m, 1H, H-5), 3.19 (dd,  $J = 13.8$  Hz,  $J = 5.3$  Hz, 1H, Asn-CH<sub>2</sub>), 2.97 (dd,  $J = 13.9$  Hz,  $J = 8.2$  Hz, 1H, Asn-CH<sub>2</sub>), 2.77 (dd,  $J = 15.6$  Hz,  $J = 3.9$  Hz, 2H, Phe-CH<sub>2</sub>), 2.69 (dd,  $J = 16.0$  Hz,  $J = 5.1$  Hz, 2H, Phe-CH<sub>2</sub>), 2.06, 2.05, 2.04, 2.02, 2.00, 1.99, 1.95 (s, 21H, CH<sub>3</sub>), 1.43 (s, 9H, C(CH<sub>3</sub>)<sub>3</sub>).

<sup>13</sup>C NMR (75 MHz, CDCl<sub>3</sub>):  $\delta = 171.0, 170.9, 170.8, 170.6, 170.5, 170.4, 169.9, 169.8, 169.4, 169.0$  (AcC=O, 'BuC=O, NHC=O), 156.0 (NHC=O), 43.8, 143.8, 141.2, 136.3 (C<sub>q,arom</sub>), 129.3, 128.6 (Ph-C<sub>arom</sub>), 127.7, (Fmoc-C<sub>arom</sub>), 127.0 (Ph-C<sub>arom</sub>, Fmoc-C<sub>arom</sub>), 125.1, 119.9 (Fmoc-C<sub>arom</sub>), 95.5 (C-1'), 82.8 (C(CH<sub>3</sub>)<sub>3</sub>), 77.6 (C-1), 75.1 (C-3), 74.2 (C-5), 72.5 (C-5'), 71.2 (C-2), 70.0 (C-2'), 69.3 (C-3'), 68.5 (C-4), 67.9 (C-4'), 67.0 (Fmoc-CH<sub>2</sub>), 62.4 (C-6), 61.4 (C-6'), 56.1 (CHNHAsn), 56.0, 49.7 (CHNHFmoc), 47.1 (Fmoc-CH), 38.2 (Asn-CH<sub>2</sub>), 38.0 (Phe-CH<sub>2</sub>), 27.8 (C(CH<sub>3</sub>)<sub>3</sub>), 20.8, 20.6, 20.6 (CH<sub>3</sub>).

$[\alpha]_{\text{D}}^{20} = + 4.7$  ( $c = 1$ , CHCl<sub>3</sub>). **Mass Anal.** Calcd for C<sub>58</sub>H<sub>69</sub>N<sub>3</sub>O<sub>23</sub> [M+Na]<sup>+</sup>:  $m/z$  1198.42141; HRMS found [M+Na]<sup>+</sup>:  $m/z$  1198.41999. **Anal.** Calcd for C<sub>58</sub>H<sub>69</sub>N<sub>3</sub>O<sub>23</sub> C: 59.23%, H: 5.91%, N: 3.57%; found C: 59.28%, H: 6.26%, N: 3.20%.



***N*<sup>2</sup>-[*N*<sup>2</sup>-[(9*H*-Fluoren-9-ylmethoxy)carbonyl]tryptophyl]-*N*-(2,3,4,6-tetra-*O*-acetyl- $\beta$ -D-glucopyranosyl)-L-asparagine-*tert*-butyl ester (**5a**)**

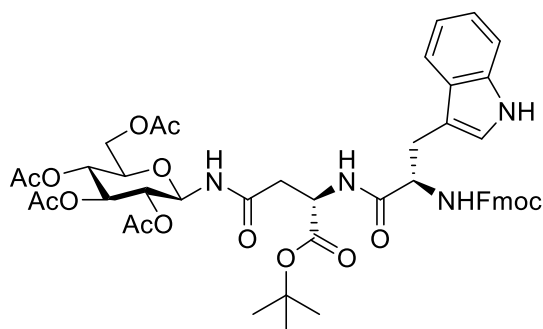

According to General Procedure D, **5a** was obtained from **3a** and Fmoc-L-Trp-OH as a colorless solid. Yield: 53% (Procedure D1)/66% (Procedure D2).

<sup>1</sup>H NMR (400 MHz, CDCl<sub>3</sub>):  $\delta$  = 8.38 (br. s., 1H, Trp-NH), 7.74 (d, *J* = 7.6 Hz, 2H, Fmoc-H<sub>arom</sub>), 7.65 (d, *J* = 7.8 Hz, 1H, Trp-H<sub>arom</sub>), 7.50–7.58, 7.35–7.41 (m, 4H, H-Fmoc), 7.25–7.35 (m, 3H, Trp-H<sub>arom</sub>, Fmoc-H<sub>arom</sub>), 7.18–7.23, 7.10–7.15 (m, 3H, Trp-H<sub>arom</sub>), 7.03 (d, *J* = 0.7 Hz, 1H, Trp-H<sub>arom</sub>), 6.98 (d, *J* = 6.4 Hz, 1H, CHNH<sub>Asn</sub>/CHNH<sub>Fmoc</sub>), 6.39 (d, *J* = 6.1 Hz, 1H, C-1-NH), 5.46–5.55 (m, 1H, CHNH<sub>Asn</sub>/CHNH<sub>Fmoc</sub>), 5.20–5.29 (m, 1H, H-3), 5.07–5.14 (m, 1H, H-1), 4.97–5.04 (m, 1H, H-4), 4.86–4.94 (m, 1H, H-2), 4.51–4.61 (m, 2H, CHNH<sub>Fmoc</sub>, CHNH<sub>Asn</sub>), 4.38–4.46 (m, 1H, Fmoc-CH<sub>2</sub>), 4.31–4.37 (m, 1H, Fmoc-CH<sub>2</sub>), 4.28 (dd, *J*<sub>6a,6b</sub> = 12.5 Hz, *J*<sub>6a,5</sub> = 4.8 Hz, 1H, H-6a), 4.15–4.22 (m, 1H, Fmoc-CH), 3.98–4.08 (m, 1H, H-6b), 3.65–3.75 (m, 1H, H-5), 3.39 (dd, *J* = 14.7 Hz, *J* = 5.7 Hz, 1H, Trp-CH<sub>2</sub>), 3.15–3.25 (m, 1H, Trp-CH<sub>2</sub>), 2.61–2.73 (m, 1H, Asn-CH<sub>2</sub>), 2.42–2.55 (m, 1H, Asn-CH<sub>2</sub>), 2.03, 2.02, 2.00, 1.99 (s, 12H, CH<sub>3</sub>), 1.39 (s, 9H, C(CH<sub>3</sub>)<sub>3</sub>).

<sup>13</sup>C NMR (101 MHz, CDCl<sub>3</sub>):  $\delta$  = 171.3, 170.8, 170.7, 170.5, 169.9, 169.5, 169.0 (AcC=O, <sup>t</sup>BuC=O, NHC=O), 156.0 (NHC=O), 143.9, 143.7, 141.2, 136.2 (C<sub>q,arom</sub>), 127.7, 127.1, 125.2 (Fmoc-C<sub>arom</sub>), 123.1, 122.3 (Trp-C<sub>arom</sub>), 119.9 (Fmoc-C<sub>arom</sub>), 119.7, 118.9, 111.4 (Trp-C<sub>arom</sub>), 110.0 (C<sub>q,arom</sub>), 82.5 (C(CH<sub>3</sub>)<sub>3</sub>), 78.0 (C-1), 73.7 (C-5), 72.7 (C-3), 70.4 (C-2), 68.1 (C-4), 67.1

(Fmoc-CH<sub>2</sub>), 61.6 (C-6), 55.4 (CHNHFmoc), 49.4 (CHNHAsn), 47.1 (Fmoc-CH), 37.8 (Asn-CH<sub>2</sub>), 27.9 (Trp-CH<sub>2</sub>), 27.8 (C(CH<sub>3</sub>)<sub>3</sub>), 20.6, 20.6, 20.5 (CH<sub>3</sub>).

$[\alpha]_{\text{D}}^{20} = +13.1$  (c = 1, CHCl<sub>3</sub>). **Mass Anal.** Calcd for C<sub>48</sub>H<sub>54</sub>N<sub>4</sub>O<sub>15</sub> [M+Na]<sup>+</sup>: m/z 949.34799; HRMS found [M+Na]<sup>+</sup>: m/z 949.34806. **Anal.** Calcd for C<sub>48</sub>H<sub>54</sub>N<sub>4</sub>O<sub>15</sub> C: 62.19%, H: 5.87%, N: 6.04%; found C: 61.82%, H: 6.19%, N: 5.73%.

***N*<sup>2</sup>-[*N*<sup>2</sup>-[(9*H*-Fluoren-9-ylmethoxy)carbonyl]tryptophyl]-*N*-(2,3,4,6-tetra-*O*-acetyl-β-*D*-galactopyranosyl)-*L*-asparagine-*tert*-butyl ester (**5b**)**

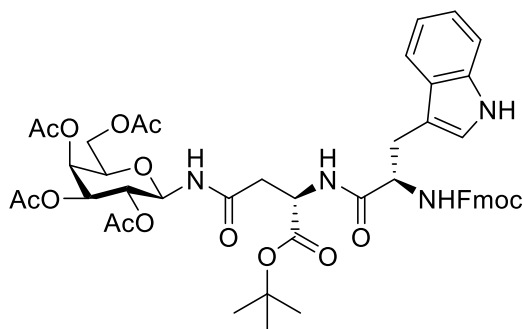

According to General Procedure D, **5b** was obtained from **3b** and Fmoc-*L*-Trp-OH as a white-yellow solid. Yield: 52% (Procedure D1)/75% (Procedure D2).

**<sup>1</sup>H NMR** (300 MHz, CDCl<sub>3</sub>): δ = 8.33 (br. s., 1H, Trp-NH), 7.74 (d, *J* = 7.5 Hz, 2H, Fmoc-H<sub>arom</sub>), 7.67 (d, *J* = 7.6 Hz, 1H, Trp-H<sub>arom</sub>), 7.47–7.58 (m, 2H, Fmoc-H<sub>arom</sub>), 7.32–7.42 (m, 3H, Fmoc-H<sub>arom</sub>, Trp-H<sub>arom</sub>), 7.26–7.31 (m, 2H, Fmoc-H<sub>arom</sub>), 7.16–7.23, 7.08–7.15 (m, 2H, Trp-H<sub>arom</sub>), 7.06 (br. s., 1H, Trp-H<sub>arom</sub>), 7.02 (d, *J* = 7.6 Hz, 1H, CHNHAsn), 6.44–6.56 (m, 1H, C-1-NH), 5.51 (d, *J* = 5.8 Hz, 1H, CHNHFmoc), 5.35–5.43 (m, 1H, H-4), 5.02–5.17 (m, 3H, H-1, H-2, H-3), 4.48–4.66 (m, 2H, CHNHFmoc, CHNHAsn), 4.28–4.45 (m, 2H, Fmoc-CH<sub>2</sub>), 4.13–4.22 (m, 2H, Fmoc-CH, H-6a), 4.01–4.13 (m, 1H, H-6b), 3.90–3.99 (ddd, 1H, H-5), 3.36

(dd,  $J = 14.9$  Hz,  $J = 6.2$  Hz, 1H, Trp-CH<sub>2</sub>), 3.25 (dd,  $J = 14.1$  Hz,  $J = 4.4$  Hz, 1H, Trp-CH<sub>2</sub>), 2.63–2.77 (m, 1H, Asn-CH<sub>2</sub>), 2.48–2.62 (m, 1H, Asn-CH<sub>2</sub>), 2.04, 2.03, 1.99, 1.97 (s, 12H, CH<sub>3</sub>), 1.40 (s, 9H, C(CH<sub>3</sub>)<sub>3</sub>).

<sup>13</sup>C NMR (75 MHz, CDCl<sub>3</sub>):  $\delta = 171.3, 171.0, 170.6, 170.4, 170.5, 170.0, 169.8, 169.1$  (AcC=O, <sup>t</sup>BuC=O, NHC=O), 155.9 (NHC=O), 143.9, 143.7, 141.2, 136.2 (C<sub>q,arom</sub>), 127.6 (Fmoc-C<sub>arom</sub>), 127.5 (C<sub>q,arom</sub>), 127.0, 125.2 (Fmoc-C<sub>arom</sub>), 125.1, 123.1, 122.3 (Trp-C<sub>arom</sub>), 119.9 (Fmoc-C<sub>arom</sub>), 119.7, 118.8, 111.4 (Trp-C<sub>arom</sub>), 110.1 (C<sub>q,arom</sub>), 82.5 (C(CH<sub>3</sub>)<sub>3</sub>), 78.4 (C-1), 72.5 (C-5), 70.8 (C-3), 68.1, 67.9 (C-2), 67.2 (C-4), 67.0 (Fmoc-CH<sub>2</sub>), 61.3 (C-6), 55.6 (CHNHFmoc), 49.4 (CHNHAsn), 47.1 (Fmoc-CH), 37.8 (Asn-CH<sub>2</sub>), 28.0 (Trp-CH<sub>2</sub>), 27.8 (C(CH<sub>3</sub>)<sub>3</sub>), 20.7, 20.5, 20.4 (CH<sub>3</sub>).

$[\alpha]_D^{20} = +17.1$  ( $c = 1$ , CHCl<sub>3</sub>). **Mass Anal.** Calcd for C<sub>48</sub>H<sub>54</sub>N<sub>4</sub>O<sub>15</sub> [M+Na]<sup>+</sup>:  $m/z$  949.34799; HRMS found [M+Na]<sup>+</sup>:  $m/z$  949.34745. **Anal.** Calcd for C<sub>48</sub>H<sub>54</sub>N<sub>4</sub>O<sub>15</sub> C: 62.19%, H: 5.87%, N: 6.04%; found C: 62.30%, H: 6.34%, N: 5.66%.

***N*<sup>2</sup>-[*N*<sup>2</sup>-[(9*H*-Fluoren-9-ylmethoxy)carbonyl]tryptophyl]-*N*-(2,3,4,6-tetra-*O*-acetyl- $\beta$ -D-mannopyranosyl)-L-asparagine-*tert*-butyl ester (5c)**

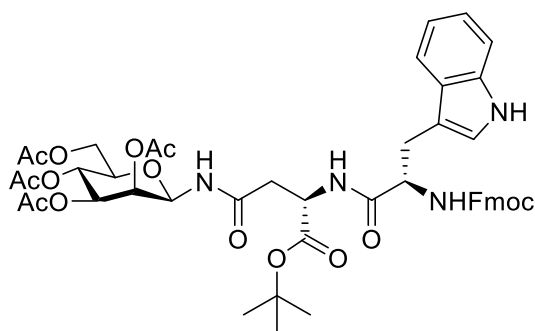

According to General Procedure D, **5c** was obtained from **3c** and Fmoc-L-Trp-OH as a white-yellow solid. Yield: 89% (Procedure D1)/62% (Procedure D2).

**<sup>1</sup>H NMR** (400 MHz, CDCl<sub>3</sub>): δ = 8.45 (br. s., 1H, Trp-NH), 7.74 (d, *J* = 7.6 Hz, 2H, Fmoc-H<sub>arom</sub>), 7.63 (d, *J* = 7.6 Hz, 1H, Trp-H<sub>arom</sub>), 7.53 (dd, *J* = 15.4 Hz, *J* = 7.3 Hz, 2H, Fmoc-H<sub>arom</sub>), 7.36–7.41 (m, 2H, Fmoc-H<sub>arom</sub>), 7.34 (d, *J* = 8.1 Hz, 1H, Trp-H<sub>arom</sub>), 7.26–7.31 (m, 2H, Fmoc-H<sub>arom</sub>), 7.14–7.20, 7.09–7.14 (m, 2H, H-Trp), 7.01–7.08 (m, 1H, CHNHAsn, Trp-H<sub>arom</sub>), 6.93 (d, *J* = 7.7 Hz, 1H, C-1-NH), 5.65 (d, *J* = 6.1 Hz, 1H, CHNHFmoc), 5.36–5.42 (m, 1H, H-1), 5.29–5.33 (m, 1H, H-2), 5.19–5.27 (m, 1H, H-4), 5.08 (dd, *J*<sub>3,4</sub> = 10.0 Hz, *J*<sub>3,2</sub> = 3.3 Hz, 1H, H-3), 4.55–4.66 (m, 1H, CHNHFmoc), 4.37–4.49 (m, 2H, Fmoc-CH<sub>2</sub>, CHNHAsn), 4.34 (dd, *J* = 12.4 Hz, *J* = 5.3 Hz, 2H, Fmoc-CH<sub>2</sub>, H-6a), 4.14–4.21 (m, 1H, Fmoc-CH), 4.06–4.11 (m, 1H, H-6b), 3.74 (ddd, *J* = 9.9 Hz, *J* = 5.1 Hz, *J* = 2.0 Hz, 1H, H-5), 3.37 (dd, *J* = 14.6 Hz, *J* = 4.7 Hz, 1H, Trp-CH<sub>2</sub>), 3.21 (dd, *J* = 14.4 Hz, *J* = 3.9 Hz, 1H, Trp-CH<sub>2</sub>), 2.57–2.73 (m, 2H, Asn-CH<sub>2</sub>), 2.05, 2.03, 1.99, 1.98 (s, 12H, CH<sub>3</sub>), 1.40 (s, 9H, C(CH<sub>3</sub>)<sub>3</sub>).

**<sup>13</sup>C NMR** (101 MHz, CDCl<sub>3</sub>): δ = 171.8, 170.7, 170.7, 170.0, 169.7, 169.4, 169.1 (AcC=O, <sup>t</sup>BuC=O, NHC=O), 156.1 (NHC=O), 143.8, 143.7, 141.2, 136.1 (C<sub>q,arom</sub>), 127.7 (Fmoc-C<sub>arom</sub>), 127.6 (C<sub>q,arom</sub>), 127.1, 125.1 (Fmoc-C<sub>arom</sub>), 123.3, 122.1 (Trp-C<sub>arom</sub>), 119.9 (Fmoc-C<sub>arom</sub>), 119.8, 118.7, 111.3 (Trp-C<sub>arom</sub>), 109.8 (C<sub>q,arom</sub>), 83.1 (C(CH<sub>3</sub>)<sub>3</sub>), 77.2, 76.2 (C-1), 74.3 (C-5), 71.6 (C-2), 69.6 (C-3), 67.1 (Fmoc-CH<sub>2</sub>), 65.2 (C-4), 62.1 (C-6), 55.5 (CHNHFmoc), 49.5 (CHNHAsn), 47.0 (Fmoc-CH), 38.3 (Asn-CH<sub>2</sub>), 28.0 (Trp-CH<sub>2</sub>), 27.8 (C(CH<sub>3</sub>)<sub>3</sub>), 20.9, 20.7, 20.6, 20.6 (CH<sub>3</sub>).

[α]<sub>D</sub><sup>20</sup> = + 4.1 (c = 0.5, CHCl<sub>3</sub>). **Mass Anal.** Calcd for C<sub>48</sub>H<sub>54</sub>N<sub>4</sub>O<sub>15</sub> [M+Na]<sup>+</sup>: m/z 949.34799; **HRMS** found [M+Na]<sup>+</sup>: m/z 949.34594. **Anal.** Calcd for C<sub>48</sub>H<sub>54</sub>N<sub>4</sub>O<sub>15</sub> C: 62:19%, H: 5.87%, N: 6:04%; found C: 62.17%, H: 6.11%, N: 5.89%.

***N*<sup>2</sup>-[*N*<sup>2</sup>-[(9*H*-Fluoren-9-ylmethoxy)carbonyl]tryptophyl]-*N*-(2,2',3,3',4,6,6'-hepta-*O*-β-*D*-cellobiosyl)-*L*-asparagine-*tert*-butyl ester (**5d**)**

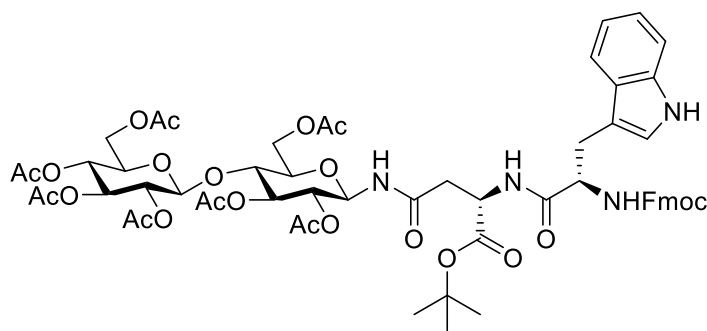

According to General Procedure D, **5d** was from **3d** and Fmoc-L-Trp-OH obtained as a white-yellow solid. Yield: 38% (Procedure D1)/59% (Procedure D2).

**<sup>1</sup>H NMR** (400 MHz, CDCl<sub>3</sub>): δ = 8.39 (br. s., 1H, Trp-NH), 7.74 (d, *J* = 7.5 Hz, 2H, Fmoc-H<sub>arom</sub>), 7.65 (d, *J* = 7.5 Hz, 1H, Trp-H<sub>arom</sub>), 7.49–7.57 (m, 2H, Fmoc-H<sub>arom</sub>), 7.35–7.41 (m, 2H, Fmoc-H<sub>arom</sub>), 7.26–7.35 (m, 3H, Trp-H<sub>arom</sub>, Fmoc-H<sub>arom</sub>), 7.15–7.22, 7.09–7.14 (m, 2H, Trp-H<sub>arom</sub>), 7.07 (br. s., 1H, Trp-H<sub>arom</sub>), 7.03 (d, *J* = 6.1 Hz, 1H, CHNHAsn), 6.46 (d, *J* = 6.9 Hz, 1H, C-1-NH), 5.57 (d, *J* = 5.0 Hz, 1H, CHNH<sub>F</sub>moc), 5.16–5.22 (m, 1H, H-3), 5.09–5.15 (m, 1H, H-3'), 5.01–5.08 (m, 2H, H-4', H-1), 4.90 (dd, *J* = 9.3 Hz, *J* = 8.2 Hz, 1H, H-2'), 4.79–4.87 (m, 1H, H-2), 4.57–4.63 (m, 1H, CHNH<sub>F</sub>moc), 4.50–4.56 (m, 1H, CHNHAsn), 4.27–4.46 (m, 5H, Fmoc-CH<sub>2</sub>, H-6a, H-6b, H-1'), 4.12–4.22 (m, 2H, Fmoc-CH, H-6a'), 3.90–3.99 (m, 1H, H-6b'), 3.56–3.68 (m, 3H, H-5', H-5, H-4), 3.36 (dd, *J* = 14.9 Hz, *J* = 6.7 Hz, 1H, Trp-CH<sub>2</sub>), 3.17–3.30 (m, 1H, Trp-CH<sub>2</sub>), 2.59–2.72 (m, 1H, Asn-CH<sub>2</sub>), 2.44–2.56 (m, 1H, Asn-CH<sub>2</sub>), 2.05, 2.01, 2.01, 2.00, 1.97, 1.96 (s, 21H, CH<sub>3</sub>), 1.39 (s, 9H, C(CH<sub>3</sub>)<sub>3</sub>).

**<sup>13</sup>C NMR** (101 MHz, CDCl<sub>3</sub>): δ = 171.4, 171.3, 171.1, 170.9, 170.7, 170.5, 170.2, 170.0, 169.5, 169.3, 168.9 (AcC=O, <sup>t</sup>BuC=O, NHC=O), 156.0 (NHC=O), 143.7, 141.2, 141.2, 136.2 (C<sub>q,arom</sub>), 127.7 (Fmoc-C<sub>arom</sub>), 127.5 (C<sub>q,arom</sub>), 127.1, 125.2 (Fmoc-C<sub>arom</sub>), 124.2, 123.1, 122.2

(Trp-C<sub>arom</sub>), 119.9 (Fmoc-C<sub>arom</sub>), 119.7, 118.8 (Trp-C<sub>arom</sub>), 111.4 (C<sub>q,arom</sub>), 100.6 (C-1'), 82.6 (C(CH<sub>3</sub>)<sub>3</sub>), 77.9 (C-1), 76.3 (C-5), 74.8 (C-5'), 72.8 (C-3), 72.2 (C-3'), 72.0 (C-4), 71.5 (C-2'), 70.6 (C-2), 67.7 (C-4'), 67.1 (Fmoc-CH<sub>2</sub>), 61.6 (C-6), 61.5 (C-6'), 55.5 (CHNH<sub>Fmoc</sub>), 49.5 (CHNH<sub>Asn</sub>), 47.1 (Fmoc-CH), 37.9 (Asn-CH<sub>2</sub>), 28.0 (Trp-CH<sub>2</sub>), 27.8 (C(CH<sub>3</sub>)<sub>3</sub>), 20.8, 20.6, 20.5, 20.5, 20.4 (CH<sub>3</sub>).

$[\alpha]_D^{20} = +1.1$  (c = 1, CHCl<sub>3</sub>). **Mass Anal.** Calcd for C<sub>60</sub>H<sub>70</sub>N<sub>4</sub>O<sub>23</sub> [M+Na]<sup>+</sup>: m/z 1237.43231; HRMS found [M+Na]<sup>+</sup>: m/z 1237.43069. **Anal.** Calcd for C<sub>60</sub>H<sub>70</sub>N<sub>4</sub>O<sub>23</sub> C: 59.30%, H: 5.81%, N: 4.61%; found C: 59.18%, H: 6.15%, N: 4.43%.

***N*<sup>2</sup>-[*N*<sup>2</sup>-[(9*H*-Fluoren-9-ylmethoxy)carbonyl]tryptophyl]-*N*-(2,2',3,3',4,6,6'-hepta-*O*-β-*D*-lactosyl)-*L*-asparagine-*tert*-butyl ester (5e)**

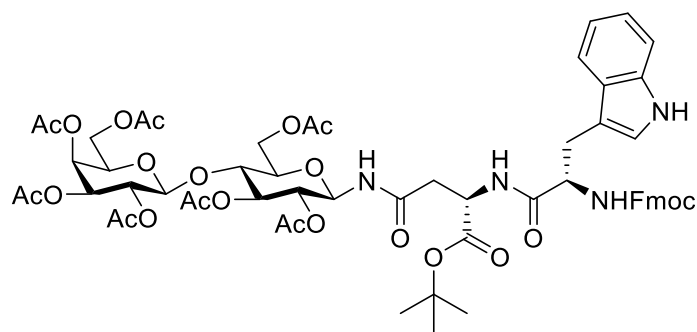

According to General Procedure D, **5e** was obtained from **3e** and Fmoc-*L*-Trp-OH as a white solid. Yield: 78% (Procedure D1)/66% (Procedure D2).

**<sup>1</sup>H NMR** (400 MHz, CDCl<sub>3</sub>): δ = 8.38 (br. s., 1H, Trp-NH), 7.74 (d, *J* = 7.6 Hz, 2H, Fmoc-H<sub>arom</sub>), 7.65 (d, *J* = 7.3 Hz, 1H, Trp-H<sub>arom</sub>), 7.49–7.58, 7.36–7.41 (m, 4H, Fmoc-H<sub>arom</sub>), 7.33 (d, *J* = 8.2 Hz, 1H, Trp-H<sub>arom</sub>), 7.26–7.30 (m, 2H, Fmoc-H<sub>arom</sub>), 7.16–7.21, 7.09–7.14 (m, 2H, Trp-H<sub>arom</sub>), 7.06 (br. s., 1H, Trp-H<sub>arom</sub>), 7.02 (d, *J* = 6.0 Hz, 1H, CHNH<sub>Asn</sub>), 6.42 (d, *J* = 6.6 Hz, 1H, C-1-NH), 5.56 (d, *J* = 5.4 Hz, 1H, CHNH<sub>Fmoc</sub>), 5.32–5.34 (m, 1H, H-4'),

5.18–5.25 (m, 1H, H-3), 5.02–5.13 (m, 2H, H-1, H-2'), 4.93 (dd,  $J_{3',2'} = 10.4$  Hz,  $J_{3',4'} = 3.4$  Hz, 1H, H-3'), 4.79–4.87 (m, 1H, H-2), 4.57–4.63 (m, 1H, CHNHFmoc), 4.50–4.55 (m, 1H, CHNHAsn), 4.28–4.46 (m, 4H, H-6a, Fmoc-CH<sub>2</sub>, H-1'), 4.14–4.22 (m, 2H, Fmoc-CH, H-6b), 4.01–4.08 (m, 2H, H6a', H-6b'), 3.79–3.86 (m, 1H, H-5'), 3.65–3.71 (m, 1H, H-4), 3.59–3.65 (m, 1H, H-5), 3.36 (dd,  $J = 14.8$  Hz,  $J = 6.2$  Hz, 1H, Trp-CH), 3.18–3.28 (m, 1H, Trp-CH<sub>2</sub>), 2.59–2.70 (m, 1H, Asn-CH<sub>2</sub>), 2.43–2.55 (m, 1H, Asn-CH<sub>2</sub>), 2.14, 2.04, 2.03, 2.02, 1.99, 1.96 (s, 21H, CH<sub>3</sub>), 1.39 (s, 9H, C(CH<sub>3</sub>)<sub>3</sub>).

<sup>13</sup>C NMR (101 MHz, CDCl<sub>3</sub>):  $\delta = 171.3, 171.0, 170.7, 170.3, 170.1, 170.1, 169.4, 169.0$  (AcC=O, <sup>t</sup>BuC=O, NHC=O), 156.0 (NHC=O), 143.9, 143.7, 141.2, 136.2 (C<sub>q,arom</sub>), 127.7 (Fmoc-C<sub>arom</sub>), 127.5 (C<sub>q,arom</sub>), 127.1, 125.2 (Fmoc-C<sub>arom</sub>), 123.0, 122.2 (Trp-C<sub>arom</sub>), 119.9 (Fmoc-C<sub>arom</sub>), 119.7, 118.8, 111.4 (Trp-C<sub>arom</sub>), 110.1 (C<sub>q,arom</sub>), 100.9 (C-1'), 82.6 (C(CH<sub>3</sub>)<sub>3</sub>), 77.9 (C-1), 76.0 (C-4), 74.8 (C-5), 72.5 (C-3), 70.9 (C-5'), 70.7 (C-3', C-2), 69.0 (C-2'), 67.1 (Fmoc-CH<sub>2</sub>), 66.6 (C-6), 61.7 (C-6'), 55.5 (CHNHFmoc), 49.5 (CHNHAsn), 47.1 (Fmoc-CH), 37.9 (Asn-CH<sub>2</sub>), 28.0 (Trp-CH<sub>2</sub>), 27.8 (C(CH<sub>3</sub>)<sub>3</sub>), 20.8, 20.7, 20.6, 20.6, 20.5 (CH<sub>3</sub>).

$[\alpha]_D^{20} = + 1.7$  (c = 0.5, CHCl<sub>3</sub>). **Mass Anal.** Calcd for C<sub>60</sub>H<sub>70</sub>N<sub>4</sub>O<sub>23</sub> [M+Na]<sup>+</sup>: m/z 1237.43231; **HRMS** found [M+Na]<sup>+</sup>: m/z 1237.43024. **Anal.** Calcd for C<sub>60</sub>H<sub>70</sub>N<sub>4</sub>O<sub>23</sub> C: 59.30%, H: 5.81%, N: 4.61%; found C: 59.03%, H: 5.96%, N: 4.60%.

***N*<sup>2</sup>-[*N*<sup>2</sup>-[(9*H*-Fluoren-9-ylmethoxy)carbonyl]tryptophyl]-*N*-(2,2',3,3',4,6,6'-hepta-*O*-β-*D*-maltosyl)-*L*-asparagine-*tert*-butyl ester (**5f**)**

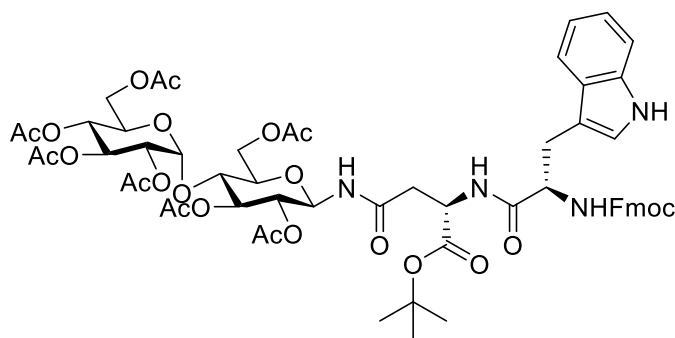

According to General Procedure D, **5f** was obtained from **3f** and Fmoc-*L*-Trp-OH as a white-yellow solid. Yield: 59% (Procedure D1)/73% (Procedure D2).

**<sup>1</sup>H NMR** (400 MHz, CDCl<sub>3</sub>): δ = 8.45 (br. s., 1H, Trp-NH), 7.75 (d, *J* = 7.5 Hz, 2H, Fmoc-H<sub>arom</sub>), 7.65 (d, *J* = 7.5 Hz, 1H, Trp-H<sub>arom</sub>), 7.50–7.58, 7.35–7.42 (m, 4H, Fmoc-H<sub>arom</sub>), 7.25–7.35 (m, 3H, Fmoc-H<sub>arom</sub>, Trp-H<sub>arom</sub>), 7.16–7.22, 7.09–7.15 (m, 2H, Trp-H<sub>arom</sub>), 7.05 (br. s., 1H, Trp-H<sub>arom</sub>), 7.02 (d, *J* = 6.6 Hz, 1H, CHNHAsn), 6.36 (d, *J* = 7.8 Hz, 1H, C-1-NH), 5.53 (d, *J* = 6.2 Hz, 1H, CHNHFmoc), 5.32–5.39 (m, 2H, H-1', H-3'), 5.26–5.32 (m, 1H, H-3), 5.03–5.14 (m, 2H, H-1, H-4'), 4.84 (dd, *J*<sub>2',3'</sub> = 10.6 Hz, *J*<sub>2',1'</sub> = 4.0 Hz, 1H, H-2'), 4.71–4.79 (m, 1H, H-2), 4.50–4.62 (m, 2H, CHNHFmoc, CHNHAsn), 4.30–4.46 (m, 3H, H-6a, Fmoc-CH<sub>2</sub>), 4.16–4.27 (m, 3H, H-6b, H-6a', Fmoc-CH), 4.06 (dd, *J*<sub>6b',6a'</sub> = 12.6 Hz, *J*<sub>6b',5'</sub> = 1.8 Hz, 1H, H-6b'), 3.86–3.95 (m, 2H, H-4, H-5'), 3.62–3.70 (m, 1H, H-5), 3.36 (dd, *J* = 14.9 Hz, *J* = 6.2 Hz, 1H, Trp-CH<sub>2</sub>), 3.18 – 3.28 (m, 1H, Trp-CH<sub>2</sub>), 2.59–2.71, 2.42–2.56 (m, 2H, Asn-CH<sub>2</sub>), 2.07, 2.05, 2.04, 2.03, 2.02, 2.00, 1.99 (s, 21H, CH<sub>3</sub>), 1.40 (s, 9H, C(CH<sub>3</sub>)<sub>3</sub>).

**<sup>13</sup>C NMR** (101 MHz, CDCl<sub>3</sub>): δ = 171.4, 170.8, 170.6, 169.9, 169.8, 169.4, 169.0 (AcC=O, <sup>t</sup>BuC=O, NHC=O), 156.0 (NHC=O), 143.9, 143.7, 141.3, 141.2, 136.2 (C<sub>q,arom</sub>), 127.7 (Fmoc-C<sub>arom</sub>), 127.6 (C<sub>q,arom</sub>), 127.1 (Trp-C<sub>arom</sub>), 125.2 (Fmoc-C<sub>arom</sub>), 123.0, 122.2 (Trp-C<sub>arom</sub>), 119.9 (Fmoc-C<sub>arom</sub>), 119.7, 118.8, 111.4 (Trp-C<sub>arom</sub>), 110.0 (C<sub>q,arom</sub>), 95.5 (C-1'), 82.6



(C(CH<sub>3</sub>)<sub>3</sub>), 77.6 (C-1), 75.1 (C-3), 74.2 (C-5), 72.5 (C-5'), 71.2 (C-2), 69.9 (C-2'), 69.3 (C-3'), 68.5 (C-4), 68.0 (C-4'), 67.1 (Fmoc-CH<sub>2</sub>), 62.5 (C-6), 61.4 (C-6'), 55.5 (CHNHAsn), 49.4 (CHNHFmoc), 47.1 (Fmoc-CH), 37.8 (Asn-CH<sub>2</sub>), 27.9 (Trp-CH<sub>2</sub>), 27.8 (C(CH<sub>3</sub>)<sub>3</sub>), 20.8, 20.8, 20.7, 20.6, 20.5 (CH<sub>3</sub>).

[ $\alpha$ ]<sub>D</sub><sup>20</sup> = +42.1 (c = 1, CHCl<sub>3</sub>). **Mass Anal.** Calcd for C<sub>60</sub>H<sub>70</sub>N<sub>4</sub>O<sub>23</sub> [M+Na]<sup>+</sup>: m/z 1237.43231; HRMS found [M+Na]<sup>+</sup>: m/z 1237.43272. **Anal.** Calcd for C<sub>60</sub>H<sub>70</sub>N<sub>4</sub>O<sub>23</sub> C: 59.30%, H: 5.81%, N: 4.61%; found C: 59.11%, H: 6.00%, N: 4.58%.

***N*<sup>2</sup>-[*N*<sup>2</sup>-[(9*H*-Fluoren-9-ylmethoxy)carbonyl]alaninyl]phenylalaninyl]-*N*-(2,3,4,6-tetra-*O*-acetyl- $\beta$ -D-glucopyranosyl)-L-asparagine-*tert*-butyl ester (**6a**)**

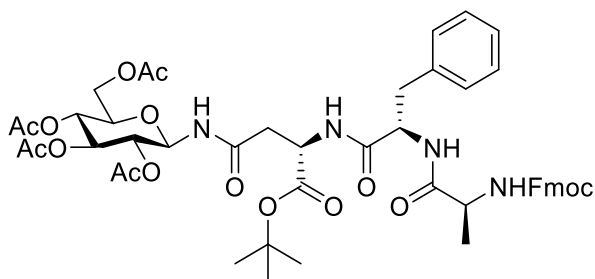

According to General Procedure D, **6a** was obtained from **4a** and Fmoc-L-Ala-OH as a colorless solid. Yield: 82% (Procedure D1)/75% (Procedure D2).

**<sup>1</sup>H NMR** (400 MHz, CDCl<sub>3</sub>):  $\delta$  = 7.76 (d, *J* = 7.5 Hz, 2H, Fmoc-H<sub>arom</sub>), 7.55–7.63, 7.34–7.45, 7.27–7.33 (m, 6H, Fmoc-H<sub>arom</sub>), 7.21–7.23 (m, 2H, Ph-H<sub>arom</sub>), 7.12–7.19 (m, 3H, Ph-H<sub>arom</sub>), 6.99 (d, *J* = 7.7 Hz, 1H, CHNHPh), 6.89 (d, *J* = 8.7 Hz, 1H, C-1-NH), 6.63 (d, *J* = 6.6 Hz, 1H, CHNHAsn), 5.50 (d, *J* = 6.4 Hz, 1H, CHNHFmoc), 5.26 (dd, *J* = 16.6 Hz, *J* = 6.6 Hz, 1H, H-3), 5.13–5.18 (m, 1H, H-1), 4.94–5.03 (m, 2H, H-4, H-2), 4.58–4.68 (m, 2H, CHNHPh, CHNHAsn), 4.28–4.42 (m, 3H, Fmoc-CH<sub>2</sub>, H-6b), 4.15–4.24 (m, 2H, CHNHFmoc, Fmoc-CH), 3.98 (dd, *J* = 12.3 Hz, *J* = 1.8 Hz, 1H, H-6a), 3.70–3.76 (m, 1H, H-5), 3.22 (dd, *J* = 14.0 Hz, *J* = 5.6 Hz, 1H, Asn-CH<sub>2</sub>), 2.97 (dd, *J* = 13.9 Hz, *J* = 8.1 Hz, 1H, Asn-CH<sub>2</sub>),

2.66–2.76 (m., 2H, Phe-CH<sub>2</sub>), 2.01–2.06 (m, 9H, CH<sub>3</sub>), 1.94 (s, 3H, CH<sub>3</sub>), 1.44 (s, 9H, C(CH<sub>3</sub>)<sub>3</sub>), 1.33 (d, *J* = 6.6 Hz, 3H, Ala-CH<sub>3</sub>).

<sup>13</sup>C NMR (101 MHz, CDCl<sub>3</sub>): δ = 172.2, 171.1, 170.9, 170.7, 170.4, 169.9, 169.5, 168.9 (AcC=O, <sup>t</sup>BuC=O, NHC=O), 155.9 (NHC=O), 143.8, 141.3, 136.1 (C<sub>q,arom</sub>), 129.2, 128.6 (Ph-C<sub>arom</sub>), 127.7 (Ph-C<sub>arom</sub>, Fmoc-C<sub>arom</sub>), 127.1, 125.1, 120.0 (Fmoc-C<sub>arom</sub>), 82.7 (C(CH<sub>3</sub>)<sub>3</sub>), 78.0 (C-1), 73.8 (C-5), 72.9 (C-3), 70.3, 68.2 (C-4, C-2), 67.1 (Fmoc-CH<sub>2</sub>), 61.6 (C-6), 54.5 (CHNHAsn),

50.4 (CHNHFmoc), 49.7 (CHNHPh), 47.1 (Fmoc-CH), 38.1 (Phe-CH<sub>2</sub>), 37.7 (Asn-CH<sub>2</sub>), 27.9 (C(CH<sub>3</sub>)<sub>3</sub>), 20.8, 20.7, 20.6, 20.5 (CH<sub>3</sub>), 18.7 (Ala-CH<sub>3</sub>).

[α]<sub>D</sub><sup>20</sup> = + 5.2 (c = 1, CHCl<sub>3</sub>). Mass Anal. Calcd for C<sub>49</sub>H<sub>58</sub>N<sub>4</sub>O<sub>16</sub> [M+Na]<sup>+</sup>: m/z 981.37406; HRMS found [M+Na]<sup>+</sup>: m/z 981.37274. Anal. Calcd for C<sub>49</sub>H<sub>58</sub>N<sub>4</sub>O<sub>16</sub> C: 61.37%, H: 6.10%, N: 5.84%; found 61.31%, H: 6.34%, N: 5.46%.

***N*<sup>2</sup>-[*N*<sup>2</sup>-[(9*H*-Fluoren-9-ylmethoxy)carbonyl]alaninyl]phenylalaninyl]-*N*-(2,3,4,6-tetra-*O*-acetyl-β-*D*-galactopyranosyl)-*L*-asparagine-*tert*-butyl ester (**6b**)**

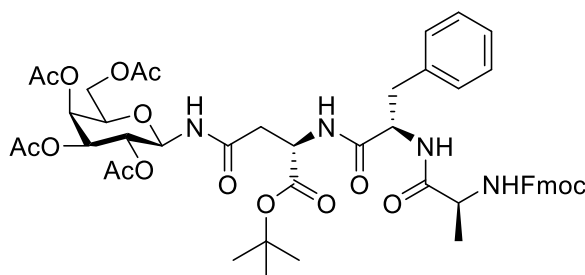

According to General Procedure D, **6b** was obtained from **4b** and Fmoc-L-Ala-OH as a colorless solid. Yield: 76% (Procedure D1)/72% (Procedure D2).

<sup>1</sup>H NMR (300 MHz, CDCl<sub>3</sub>): δ = 7.75 (d, *J* = 7.5 Hz, 2H, Fmoc-H<sub>arom</sub>), 7.54–7.62, 7.35–7.43, 7.27–7.34 (m, 6H, Fmoc-H<sub>arom</sub>), 7.12–7.24 (m, 5H, Ph-H<sub>arom</sub>), 7.03 (d, *J* = 7.6 Hz, 1H,

CHNHAsn/CHNHPh), 6.90 (d,  $J = 7.2$  Hz, 1H, C-1-NH), 6.65 (d,  $J = 7.1$  Hz, 1H, CHNHAsn/CHNHPh), 5.51 (d,  $J = 6.0$  Hz, 1H, CHNHFmoc), 5.36 (d,  $J = 3.0$  Hz, 1H, H-3), 5.10–5.21 (m, 2H, H-4, H-1), 5.02–5.09 (m, 1H, H-2), 4.57–4.69 (m, 2H, CHNHAsn, CHNHPh), 4.41 (dd,  $J = 10.3$  Hz,  $J = 7.3$  Hz, 1H, Fmoc-CH<sub>2</sub>), 4.23–4.33 (m, 2H, Fmoc-CH<sub>2</sub>, H-6a), 4.12–4.23 (m, 2H, CHNHFmoc, Fmoc-CH), 3.86–4.00 (m, 2H, H-5, H-6b), 3.26 (dd,  $J = 14.0$  Hz,  $J = 5.1$  Hz, 1H, Asn-CH<sub>2</sub>), 2.98 (dd,  $J = 14.0$  Hz,  $J = 8.7$  Hz, 1H, Asn-CH<sub>2</sub>), 2.69–2.77 (m, 2H, Phe-CH<sub>2</sub>), 2.06, 2.05, 1.91 (s, 12H, CH<sub>3</sub>), 1.45 (s, 9H, C(CH<sub>3</sub>)<sub>3</sub>), 1.34 (d,  $J = 6.6$  Hz, 3H, Ala-CH<sub>3</sub>).

<sup>13</sup>C NMR (75 MHz, CDCl<sub>3</sub>):  $\delta = 172.2$ , 171.0, 170.9, 170.7, 170.5, 170.0, 169.8, 169.0 (AcC=O, <sup>t</sup>BuC=O, NHC=O), 155.9 (NHC=O), 143.8, 143.8, 141.3, 136.3 (C<sub>q,arom</sub>), 129.2, 128.6 (Ph-C<sub>arom</sub>), 127.7 (Ph-C<sub>arom</sub>, Fmoc-C<sub>arom</sub>), 127.1, 125.1, 120.0 (Fmoc-C<sub>arom</sub>), 82.7 (C(CH<sub>3</sub>)<sub>3</sub>), 78.4 (C-1), 72.6 (C-5), 71.0 (C-2), 67.9 (C-4), 67.2 (C-3), 67.0 (Fmoc-CH<sub>2</sub>), 61.3 (C-6), 54.8 (CHNHAsn), 50.5 (CHNHFmoc), 49.8 (CHNHPh), 47.1 (Fmoc-CH), 38.0 (Asn-CH<sub>2</sub>), 37.7 (Phe-CH<sub>2</sub>), 27.9 (C(CH<sub>3</sub>)<sub>3</sub>), 20.8, 20.5, 20.2 (CH<sub>3</sub>), 18.8 (Ala-CH<sub>3</sub>).

$[\alpha]_D^{20} = +32.9$  ( $c = 1$ , CHCl<sub>3</sub>). **Mass Anal.** Calcd for C<sub>49</sub>H<sub>58</sub>N<sub>4</sub>O<sub>16</sub> [M+Na]<sup>+</sup>:  $m/z$  981.37400; HRMS found [M+Na]<sup>+</sup>:  $m/z$  981.37402. **Anal.** Calcd for C<sub>49</sub>H<sub>58</sub>N<sub>4</sub>O<sub>16</sub> C: 61.37%, H: 6.10%, N: 5.84%; found C: 61.27%, H: 6.22%, N: 5.78%.

***N*<sup>2</sup>-[*N*<sup>2</sup>-[(9*H*-Fluoren-9-ylmethoxy)carbonyl]alaninyl]phenylalaninyl]-*N*-(2,3,4,6-tetra-*O*-acetyl- $\beta$ -D-mannopyranosyl)-L-asparagine-*tert*-butyl ester (**6c**)**

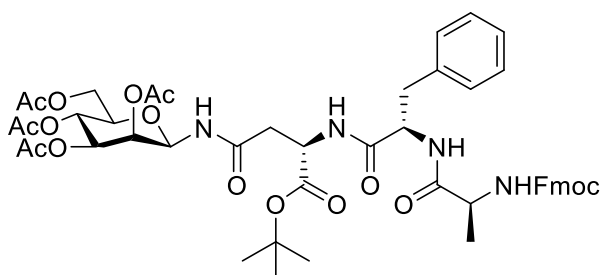

According to General Procedure D, **6c** was obtained from **4c** and Fmoc-L-Ala-OH as a colorless solid. Yield: 64% (Procedure D1)/60% (Procedure D2).

**<sup>1</sup>H NMR** (600 MHz, CDCl<sub>3</sub>):  $\delta$  = 7.75 (d,  $J$  = 7.7 Hz, 2H, Fmoc-H<sub>arom</sub>), 7.57 (d,  $J$  = 6.8 Hz, 2H, Fmoc-H<sub>arom</sub>), 7.36–7.40 (m, 2H, Fmoc-H<sub>arom</sub>), 7.27–7.35 (m, 4H, Fmoc-H<sub>arom</sub>, CHNHPhe, C-1-NH), 7.17–7.22, 7.10–7.14 (m, 5H, Ph-H<sub>arom</sub>), 7.01 (d,  $J$  = 6.1 Hz, 1H, CHNHAsn), 5.46–5.51 (m, 1H, H-1), 5.40 (d,  $J$  = 6.4 Hz, 1H, CHNHFmoc), 5.34–5.37 (m, 1H, H-2), 5.21–5.26 (m, 1H, H-4), 5.14 (dd,  $J_{3,4}$  = 10.1 Hz,  $J_{3,2}$  = 3.3 Hz, 1H, H-3), 4.73–4.79 (m, 1H, CHNHAsn), 4.50–4.55 (m, 1H, CHNHPhe), 4.35–4.44 (m, 2H, H-6a, Fmoc-CH<sub>2</sub>), 4.26–4.33 (m, 1H, Fmoc-CH<sub>2</sub>), 4.18–4.24 (m, 1H, CHNHFmoc), 4.14–4.18 (m, 1H, Fmoc-CH), 4.06–4.10 (m, 1H, H-6b), 3.78 (ddd,  $J_{5,4}$  = 10.1 Hz,  $J_{5,6}$  = 5.1 Hz,  $J_{5,6}$  = 2.0 Hz, 1H, H-5), 3.21 (dd,  $J$  = 14.1 Hz,  $J$  = 5.0 Hz, 1H, Asn-CH<sub>2</sub>), 2.97 (dd,  $J$  = 14.0 Hz,  $J$  = 8.9 Hz, 1H, Asn-CH<sub>2</sub>), 2.74 (dd,  $J$  = 15.6 Hz,  $J$  = 2.6 Hz, 1H, Phe-CH<sub>2</sub>), 2.64–2.78 (m, 2H, Phe-CH<sub>2</sub>), 2.13, 2.02, 1.97, 1.93 (s, 12H, CH<sub>3</sub>), 1.42 (s, 9H, C(CH<sub>3</sub>)<sub>3</sub>), 1.28 (d,  $J$  = 5.9 Hz, 3H, Ala-CH<sub>3</sub>).

**<sup>13</sup>C NMR** (151 MHz, CDCl<sub>3</sub>):  $\delta$  = 172.4, 171.1, 170.9, 170.5, 169.9, 169.6, 169.5, 169.1 (AcC=O, <sup>t</sup>BuC=O, NHC=O), 155.8 (NHC=O), 143.7, 143.7, 141.2, 136.2, 130.6 (C<sub>q,arom</sub>), 129.2, 128.5 (Ph-C<sub>arom</sub>), 127.7, 127.1 (Fmoc-C<sub>arom</sub>), 126.9 (Ph-C<sub>arom</sub>), 125.0, 119.9 (Fmoc-C<sub>arom</sub>), 82.8 (C(CH<sub>3</sub>)<sub>3</sub>), 76.4 (C-1), 74.5 (C-5), 71.5 (C-3), 69.7 (C-2), 67.0 (Fmoc-CH<sub>2</sub>), 65.2 (C-4), 61.8 (C-6), 54.1 (CHNHAsn), 50.4 (CHNHFmoc), 49.4 (CHNHPhe), 47.0

(Fmoc-CH), 37.9 (Asn-CH<sub>2</sub>), 37.7 (Phe-CH<sub>2</sub>), 27.8 (C(CH<sub>3</sub>)<sub>3</sub>), 20.8, 20.6, 20.6, 20.5 (CH<sub>3</sub>), 18.4 (Ala-CH<sub>3</sub>).

$[\alpha]_{\text{D}}^{20} = -17.4$  ( $c = 1$ , CHCl<sub>3</sub>). **Mass Anal.** Calcd for C<sub>49</sub>H<sub>58</sub>N<sub>4</sub>O<sub>16</sub> [M+Na]<sup>+</sup>:  $m/z$  981.37400; HRMS found [M+Na]<sup>+</sup>:  $m/z$  981.37404. **Anal.** Calcd for C<sub>49</sub>H<sub>58</sub>N<sub>4</sub>O<sub>16</sub> C: 61.37%, H: 6.10%, N: 5.84%; found C: 61.57%, H: 6.49%, N: 5.47%.

***N*<sup>2</sup>-[*N*<sup>2</sup>-[(9*H*-Fluoren-9-ylmethoxy)carbonyl]alaninyl]phenylalaninyl]-*N*-(2,2',3,3',4,6,6'-hepta-*O*-acetyl-β-*D*-cellobiosyl)-*L*-asparagine-*tert*-butyl ester (**6d**)**

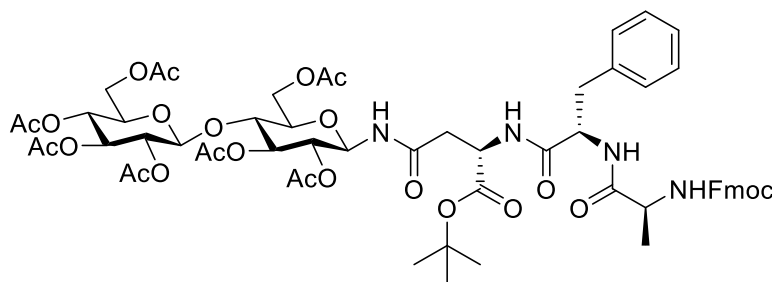

According to General Procedure D, **6d** was obtained from **4d** and Fmoc-*L*-Ala-OH as a colorless solid. Yield: 75% (Procedure D1)/59% (Procedure D2).

**<sup>1</sup>H NMR** (700 MHz, CDCl<sub>3</sub>):  $\delta = 7.74$  (d,  $J = 7.5$  Hz, 2H, Fmoc-H<sub>arom</sub>), 7.55–7.60 (m, 2H, Fmoc-H<sub>arom</sub>), 7.37 (td,  $J = 7.4$  Hz,  $J = 3.1$  Hz, 2H, Fmoc-H<sub>arom</sub>), 7.26–7.30 (m, 2H, Fmoc-H<sub>arom</sub>), 7.18–7.22, 7.15–7.18 (m, 4H, Ph-H<sub>arom</sub>), 7.10–7.15 (m, 2H, Ph-H<sub>arom</sub>, CHNH<sub>Phe</sub>), 6.98 (d,  $J = 8.8$  Hz, 1H, C-1-NH), 6.93 (d,  $J = 6.2$  Hz, 1H, CHNH<sub>Asn</sub>), 5.66 (d,  $J = 7.1$  Hz, 1H, CHNH<sub>Fmoc</sub>), 5.17 – 5.21 (m, 1H, H-3), 5.07–5.12 (m, 2H, H-3', H-1), 5.01–5.05 (m, 1H, H-4'), 4.81–4.93 (m, 2H, H-2', H-2), 4.66–4.71 (m, 1H, CHNH<sub>Asn</sub>), 4.54–4.59 (m, 1H, CHNH<sub>Phe</sub>), 4.43 (d,  $J = 8.0$  Hz, 1H, H-1'), 4.35–4.40 (m, 1H, Fmoc-CH<sub>2</sub>), 4.32–4.34 (m, 1H, H-6a), 4.30 (dd,  $J_{6a',6b} = 12.5$  Hz,  $J_{6a',5} = 4.3$  Hz, 1H, H-6a'), 4.25–4.28 (m, 1H, Fmoc-CH<sub>2</sub>), 4.23 (dd,  $J = 12.0$  Hz,  $J = 5.4$  Hz, 2H, H-6b, CHNH<sub>Fmoc</sub>), 4.15–4.18 (m, 1H, Fmoc-CH), 3.91–

3.95 (m, 1H, H-6b'), 3.63–3.67 (m, 1H, H-4), 3.60–3.63 (m, 1H, H-5), 3.55–3.59 (m, 1H, H-5'), 3.18 (dd,  $J = 14.0$  Hz,  $J = 5.4$  Hz, 1H, Asn-CH<sub>2</sub>), 2.93 (dd,  $J = 13.9$  Hz,  $J = 8.3$  Hz, 1H, Asn-CH<sub>2</sub>), 2.66–2.73 (m, 2H, Phe-CH<sub>2</sub>), 2.06, 2.01, 2.00, 1.99, 1.97, 1.95, 1.92 (s, 21H, CH<sub>3</sub>), 1.42 (m, 9H, C(CH<sub>3</sub>)<sub>3</sub>), 1.31 (d,  $J = 6.5$  Hz, 3H, Ala-CH<sub>3</sub>).

<sup>13</sup>C NMR (176 MHz, CDCl<sub>3</sub>):  $\delta = 172.3, 170.8, 170.7, 170.6, 170.5, 170.4, 170.2, 169.5, 169.2, 168.9, 168.9$  (AcC=O, <sup>t</sup>BuC=O, NHC=O), 155.8 (NHC=O), 143.7, 143.7, 141.2, 136.2 (C<sub>q,arom</sub>), 129.2, 128.5 (Ph-C<sub>arom</sub>), 127.7, 127.7, 127.0 (Fmoc-C<sub>arom</sub>), 126.9 (Ph-C<sub>arom</sub>), 125.1, 119.9 (Fmoc-C<sub>arom</sub>), 100.6 (C-1'), 82.6 (C(CH<sub>3</sub>)<sub>3</sub>), 77.8 (C-1), 76.4 (C-4), 74.8 (C-5), 72.8 (C-3'), 72.4 (C-3), 71.8 (C-5'), 71.4 (C-2'), 70.5 (C-2), 67.6 (C-4'), 67.0 (Fmoc-CH<sub>2</sub>), 61.7 (C-6), 61.4 (C-6'), 54.4 (CHNHAsn), 50.3 (CHNHFmoc), 49.7 (CHNHPh), 47.0 (Fmoc-CH), 38.0 (Phe-CH<sub>2</sub>), 37.8 (Asn-CH<sub>2</sub>), 27.8 (C(CH<sub>3</sub>)<sub>3</sub>), 20.8, 20.6, 20.5, 20.5, 20.4, 20.4, 20.4 (CH<sub>3</sub>), 18.7 (Ala-CH<sub>3</sub>).

$[\alpha]_D^{20} = -2.0$  ( $c = 0.5$ , CHCl<sub>3</sub>). **Mass** Anal. Calcd for C<sub>61</sub>H<sub>74</sub>N<sub>4</sub>O<sub>24</sub> [M+Na]<sup>+</sup>:  $m/z$  1269.45852; HRMS found [M+Na]<sup>+</sup>:  $m/z$  1269.45754. **Anal.** Calcd for C<sub>61</sub>H<sub>74</sub>N<sub>4</sub>O<sub>24</sub> C: 58.68%, H: 5.98%, N: 4.49%; found C: 58.68%, H: 6.22%, N: 4.23%.

***N*<sup>2</sup>-[*N*<sup>2</sup>-[(9*H*-Fluoren-9-ylmethoxy)carbonyl]alaninyl]phenylalaninyl]-*N*-(2,2',3,3',4,6,6'-hepta-*O*-acetyl-β-*D*-lactosyl)-*L*-asparagine-*tert*-butyl ester (**6e**)**

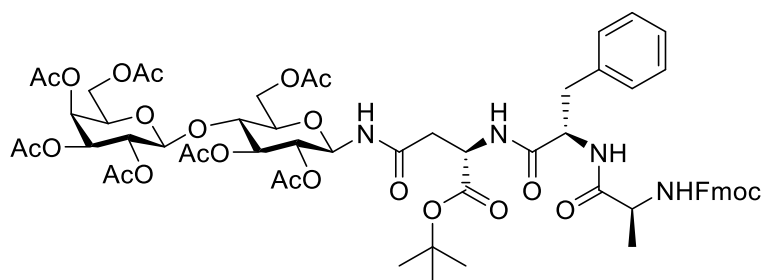

According to General Procedure D, **6e** was obtained from **4e** and Fmoc-*L*-Ala-OH as a colorless solid. Yield: 50% (Procedure D1)/70% (Procedure D2).

**<sup>1</sup>H NMR** (400 MHz, CDCl<sub>3</sub>): δ = 7.75 (d, *J* = 7.6 Hz, 2H, Fmoc-H<sub>arom</sub>), 7.55–7.61, 7.35–7.41, 7.25–7.32 (m, 6H, Fmoc-H<sub>arom</sub>), 7.12–7.24 (m, 5H, Ph-H<sub>arom</sub>), 7.10 (d, *J* = 7.6 Hz, 1H, CHNHPh), 6.95 (d, *J* = 8.9 Hz, 1H, C-1-NH), 6.87 (d, *J* = 6.6 Hz, 1H, CHNHAsn), 5.61 (d, *J* = 7.0 Hz, 1H, CHNHFmoc), 5.30 (dd, *J*<sub>4',3'</sub> = 3.4 Hz, *J*<sub>4',5'</sub> = 0.7 Hz, 1H, H-4'), 5.15–5.24 (m, 1H, H-3), 5.04–5.13 (m, 2H, H-1, H-2'), 4.85–4.94 (m, 2H, H-2, H-3'), 4.65–4.72 (m, 1H, CHNHAsn), 4.54–4.60 (m, 1H, CHNHPh), 4.41 (d, *J*<sub>1',2'</sub> = 7.9 Hz, 1H, H-1'), 4.32–4.39 (m, 1H, Fmoc-CH<sub>2</sub>), 4.13–4.31 (m, 5H, H-6a, H-6b, Fmoc-CH<sub>2</sub>, Fmoc-CH, CHNHFmoc), 3.97–4.07 (m, 2H, H-6a', H-6b'), 3.76–3.82 (m, 1H, H-5'), 3.60–3.71 (m, 2H, H-4, H-5), 3.20 (dd, *J* = 13.9 Hz, *J* = 5.4 Hz, 1H, Asn-CH<sub>2</sub>), 2.94 (dd, *J* = 13.9 Hz, *J* = 8.4 Hz, 1H, Asn-CH<sub>2</sub>), 2.64–2.75 (m, 2H, Phe-CH<sub>2</sub>), 2.12, 2.07, 2.01, 2.01, 2.00, 1.96, 1.94 (s, 21H, CH<sub>3</sub>), 1.43 (s, 9H, C(CH<sub>3</sub>)<sub>3</sub>), 1.32 (d, *J* = 6.5 Hz, 3H, Ala-CH<sub>3</sub>).

**<sup>13</sup>C NMR** (101 MHz, CDCl<sub>3</sub>): δ = 172.3, 170.9, 170.8, 170.6, 170.5, 170.2, 170.1, 170.0, 169.4, 168.9, 168.9 (AcC=O, <sup>t</sup>BuC=O, NHC=O), 155.8 (NHC=O), 143.8, 143.7, 141.2, 136.2 (C<sub>q,arom</sub>), 129.2, 128.5 (Ph-C<sub>arom</sub>), 127.7 (Ph-C<sub>arom</sub>), 127.0 (Fmoc-C<sub>arom</sub>), 126.9 (Ph-C<sub>arom</sub>), 125.1, 120.0 (Fmoc-C<sub>arom</sub>), 100.9 (C-1'), 82.6 (C(CH<sub>3</sub>)<sub>3</sub>), 77.8 (C-1), 76.2 (C-4), 74.8 (C-5), 72.7 (C-3), 70.9 (C-3'/C-5'), 70.6 (C-2), 70.6 (C-3'/C-5'), 69.0 (C-2'), 67.0 (Fmoc-CH<sub>2</sub>), 66.5

(C-5'), 61.8 (C-6), 60.7 (C-6'), 54.4 (CHNHAsn), 50.4 (CHNHFmoc), 49.8 (CHNHPhe), 47.0 (Fmoc-CH), 38.0 (Phe-CH<sub>2</sub>), 37.8 (Asn-CH<sub>2</sub>), 27.8 (C(CH<sub>3</sub>)<sub>3</sub>), 20.9, 20.7, 20.6, 20.6, 20.5, 20.4 (CH<sub>3</sub>), 18.7 (Ala-CH<sub>3</sub>).

$[\alpha]_D^{20} = +0.5$  (c = 0.5, CHCl<sub>3</sub>). **Mass Anal.** Calcd for C<sub>61</sub>H<sub>74</sub>N<sub>4</sub>O<sub>24</sub> [M+Na]<sup>+</sup>: m/z 1269.45852; **HRMS** found [M+Na]<sup>+</sup>: m/z 1269.45731. **Anal.** Calcd for C<sub>61</sub>H<sub>74</sub>N<sub>4</sub>O<sub>24</sub> C: 58.68%, H: 5.98%, N: 4.49%; found C: 58.62%, H: 6.07%, N: 4.40%.

***N*<sup>2</sup>-[*N*<sup>2</sup>-[(9*H*-Fluoren-9-ylmethoxy)carbonyl]alaninyl]phenylalaninyl]-*N*-(2,2',3,3',4,6,6'-hepta-*O*-acetyl-β-*D*-maltosyl)-*L*-asparagine-*tert*-butyl ester (**6f**)**

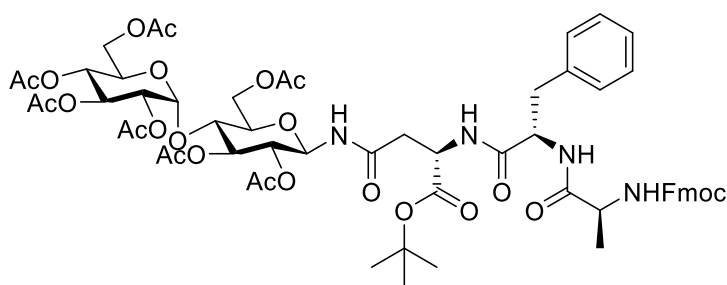

According to General Procedure D, **6f** was obtained from **4f** and Fmoc-*L*-Ala-OH as a white-yellow solid. Yield: 50% (Procedure D1)/78% (Procedure D2).

**<sup>1</sup>H NMR** (400 MHz, CDCl<sub>3</sub>): δ = 7.76 (d, *J* = 7.5 Hz, 2H, Fmoc-H<sub>arom</sub>), 7.54–7.63, 7.36–7.43, 7.27–7.33 (m, 6H, Fmoc-H<sub>arom</sub>), 7.12–7.24 (m, 6H, Ph-H<sub>arom</sub>), 7.04 (d, *J* = 7.5 Hz, 1H, CHNHPhe), 6.80 (d, *J* = 9.3 Hz, 1H, C-1-NH), 6.76 (d, *J* = 7.1 Hz, 1H, CHNHAsn), 5.56 (d, *J* = 6.8 Hz, 1H, CHNHFmoc), 5.31–5.39 (m, 3H, H-1', H-3'), 5.23–5.31 (m, 1H, H-3), 5.09–5.17 (m, 1H, H-1), 5.00–5.08 (m, 1H, H-4'), 4.77–4.87 (m, 2H, H-2, H-2'), 4.63–4.71 (m, 1H, CHNHAsn), 4.54–4.61 (m, 1H, CHNHPhe), 4.33–4.43 (m, 2H, Fmoc-CH<sub>2</sub>, H-6a), 4.24–4.32 (m, 2H, Fmoc-CH<sub>2</sub>, H-6b), 4.14–4.24 (m, 4H, H-6a', CHNHFmoc, Fmoc-CH), 4.01–4.08 (m, 1H, H-6b'), 3.85–3.94 (m, 2H, H-4, H-5'), 3.61–3.70 (m, 1H, H-5), 3.21 (dd, *J* = 14.1 Hz, *J* =



5.4 Hz, 1H, Asn-CH<sub>2</sub>), 2.94 (dd, *J* = 13.9 Hz, *J* = 8.4 Hz, 1H, Asn-CH<sub>2</sub>), 2.63–2.77 (m, 2H, Phe-CH<sub>2</sub>), 1.91–2.11 (s, 21H, CH<sub>3</sub>), 1.44 (s, 9H, C(CH<sub>3</sub>)<sub>3</sub>), 1.33 (d, *J* = 6.4 Hz, 3H, Ala-CH<sub>3</sub>).

<sup>13</sup>C NMR (101 MHz, CDCl<sub>3</sub>): δ = 172.3, 170.9, 170.8, 170.6, 170.5, 170.5, 170.4, 169.8, 169.4, 168.9 (AcC=O, <sup>t</sup>BuC=O, NHC=O), 155.9 (NHC=O), 143.8, 141.2, 136.2 (C<sub>q,arom</sub>), 129.2, 128.5 (Ph-C<sub>arom</sub>), 127.7 (Fmoc-C<sub>arom</sub>), 127.0 (Ph-C<sub>arom</sub>, Fmoc-C<sub>arom</sub>), 125.1, 120.0 (Fmoc-C<sub>arom</sub>), 95.5 (C-1'), 82.7 (C(CH<sub>3</sub>)<sub>3</sub>), 77.6 (C-1), 75.3 (C-3), 74.1 (C-5), 72.4 (C-5'), 71.0 (C-2), 69.9 (C-2'), 69.3 (C-3'), 68.5 (C-4), 67.9 (C-4'), 67.0 (Fmoc-CH<sub>2</sub>), 62.4 (C-6), 61.3 (C-6'), 54.4 (CHNHAsn), 50.4 (CHNHFmoc), 49.7 (CHNHPh), 47.1 (Fmoc-CH), 38.0 (Phe-CH<sub>2</sub>), 37.7 (Asn-CH<sub>2</sub>), 27.8 (C(CH<sub>3</sub>)<sub>3</sub>), 20.9, 20.8, 20.6, 20.6 (CH<sub>3</sub>), 18.7 (Ala-CH<sub>3</sub>).

[α]<sub>D</sub><sup>20</sup> = + 38.0 (c = 1, CHCl<sub>3</sub>). Mass Anal. Calcd for C<sub>61</sub>H<sub>74</sub>N<sub>4</sub>O<sub>24</sub> [M+Na]<sup>+</sup>: m/z 1269.45852, HRMS found [M+Na]<sup>+</sup>: m/z 1269.45675. Anal. Calcd for C<sub>61</sub>H<sub>74</sub>N<sub>4</sub>O<sub>24</sub> C: 58.68%, H: 5.98%, N: 4.49%; found C: 58.37%, H: 6.10%, N: 4.20%.

***N*<sup>2</sup>-[*N*<sup>2</sup>[*N*<sup>2</sup>-[(9*H*-Fluoren-9-ylmethoxy)carbonyl]alaninyl]tryptophyl]-*N*-(2,3,4,6-tetra-*O*-acetyl-β-*D*-glucopyranosyl)-*L*-asparagine-*tert*-butyl ester (7a)**

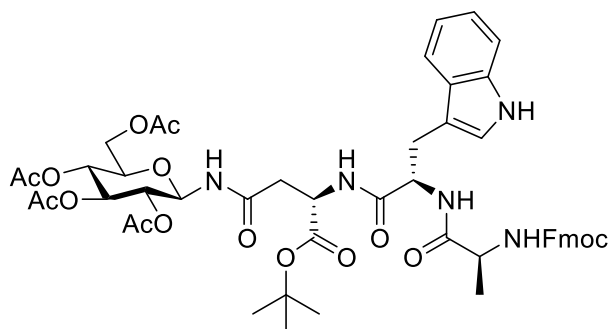

According to General Procedure D, **7a** was obtained from **5a** and Fmoc-*L*-Ala-OH as a white-yellow solid. Yield: 60% (Procedure D1)/68% (Procedure D2).

**<sup>1</sup>H NMR** (400 MHz, CDCl<sub>3</sub>): δ = 8.27 (br. s., 1H, Trp-NH), 7.76 (d, *J* = 7.6 Hz, 2H, Fmoc-H<sub>arom</sub>), 7.54–7.63 (m, 3H, Trp-H<sub>arom</sub>, Fmoc-H<sub>arom</sub>), 7.36–7.43, 7.27–7.33 (m, 4H, Fmoc-H<sub>arom</sub>), 7.23 (s, 1H, Trp-H<sub>arom</sub>), 7.09–7.16, 7.01–7.09 (m, 3H, Trp-H<sub>arom</sub>), 6.99 (d, *J* = 7.7 Hz, 1H, CHNH<sub>Asn</sub>), 6.79 (d, *J* = 6.5 Hz, 1H, CHNH<sub>Trp</sub>), 6.72 (d, *J* = 9.2 Hz, 1H, C-1-NH), 5.47 (d, *J* = 7.1 Hz, 1H, CHNH<sub>Fmoc</sub>), 5.18–5.26 (m, 1H, H-3), 5.08–5.15 (m, 1H, H-1), 4.97–5.03 (m, 1H, H-4), 4.90–4.96 (m, 1H, H-2), 4.72 (q, *J* = 6.1 Hz, 1H, CHNH<sub>Trp</sub>), 4.49–4.56 (m, 1H, CHNH<sub>Asn</sub>), 4.32–4.40 (m, 1H, Fmoc-CH<sub>2</sub>), 4.24–4.31 (m, 2H, H-6a, Fmoc-CH<sub>2</sub>), 4.14–4.23 (m, 2H, Fmoc-CH, CHNH<sub>Fmoc</sub>), 4.01 (dd, *J*<sub>6b,6a</sub> = 12.3 Hz, *J*<sub>6b,5</sub> = 1.8 Hz, 1H, H-6b), 3.64–3.74 (m, 1H, H-5), 3.28 (dd, *J* = 14.8 Hz, *J* = 6.1 Hz, 1H, Trp-CH<sub>2</sub>), 3.25 (dd, *J* = 14.7 Hz, *J* = 5.6 Hz, 1H, Trp-CH<sub>2</sub>), 2.63 (dd, *J* = 15.9 Hz, *J* = 4.0 Hz, 1H, Asn-CH<sub>2</sub>), 2.48 (dd, *J* = 15.9 Hz, *J* = 4.8 Hz, 1H, Asn-CH<sub>2</sub>), 2.02, 2.00, 1.95 (s, 12H, CH<sub>3</sub>), 1.42 (s, 9H, C(CH<sub>3</sub>)<sub>3</sub>), 1.32 (d, *J* = 6.6 Hz, 3H, Ala-CH<sub>3</sub>).

**<sup>13</sup>C NMR** (101 MHz, CDCl<sub>3</sub>): δ = 172.3, 170.8, 170.8, 170.7, 170.6, 169.9, 169.5, 169.0 (AcC=O, <sup>t</sup>BuC=O, NHC=O), 155.9 (NHC=O), 143.8, 141.2, 136.1 (C<sub>q,arom</sub>), 127.8 (Fmoc-C<sub>arom</sub>), 127.5 (C<sub>q,arom</sub>), 127.1, 125.2 (Fmoc-C<sub>arom</sub>), 123.2, 122.2 (Trp-C<sub>arom</sub>), 120.0 (Fmoc-C<sub>arom</sub>), 119.6, 118.7, 111.3 (Trp-C<sub>arom</sub>), 109.8 (C<sub>q,arom</sub>), 82.5 (C(CH<sub>3</sub>)<sub>3</sub>), 78.0 (C-1), 73.7 (C-5), 72.8 (C-3), 70.4 (C-2), 68.2 (C-4), 67.0 (Fmoc-CH<sub>2</sub>), 61.6 (C-6), 53.8 (CHNH<sub>Trp</sub>), 50.5 (CHNH<sub>Fmoc</sub>), 49.5 (CHNH<sub>Asn</sub>), 47.1 (Fmoc-CH), 37.7 (Asn-CH<sub>2</sub>), 27.8 (C(CH<sub>3</sub>)<sub>3</sub>), 27.6 (Trp-CH<sub>2</sub>), 20.7, 20.6, 20.6, 20.5 (CH<sub>3</sub>), 18.6 (Ala-CH<sub>3</sub>).

$[\alpha]_{\text{D}}^{20} = +5.7$  (c = 1, CHCl<sub>3</sub>). **Mass Anal.** Calcd for C<sub>51</sub>H<sub>59</sub>N<sub>5</sub>O<sub>16</sub> [M+Na]<sup>+</sup>: m/z 1020.38490; HRMS found [M+Na]<sup>+</sup>: m/z 1020.38502. **Anal.** Calcd for C<sub>51</sub>H<sub>59</sub>N<sub>5</sub>O<sub>16</sub> C: 61.38%, H: 5.96%, N: 7.02%; found C: 61.19%, H: 6.85%, N: 6.85%.

***N*<sup>2</sup>-[*N*<sup>2</sup>-[(9*H*-Fluoren-9-ylmethoxy)carbonyl]alaninyl]tryptophyl]-*N*-(2,3,4,6-*O*-acetyl- $\beta$ -D-galactopyranosyl)-L-asparagine-*tert*-butyl ester (**7b**)**

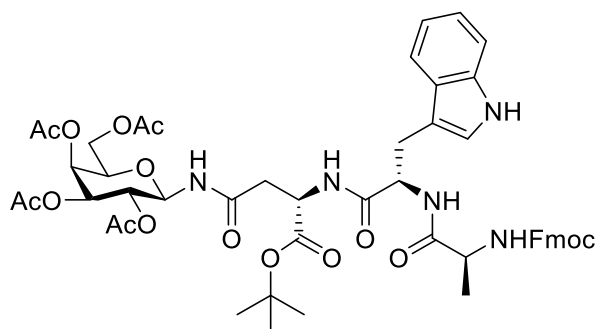

According to General Procedure D, **7b** was obtained from **5b** and Fmoc-L-Ala-OH as a yellowish solid. Yield: 76% (Procedure D1)/79% (Procedure D2).

**<sup>1</sup>H NMR** (300 MHz, CDCl<sub>3</sub>):  $\delta$  = 8.23 (br. s., 1H, Trp-NH), 7.76 (d,  $J$  = 7.5 Hz, 2H, Fmoc-H<sub>arom</sub>), 7.64 (d,  $J$  = 7.7 Hz, 1H, Trp-H<sub>arom</sub>), 7.53–7.61 (m, 2H, Fmoc-H<sub>arom</sub>), 7.40 (td,  $J$  = 7.1 Hz,  $J$  = 2.4 Hz, 2H, Fmoc-H<sub>arom</sub>), 7.26–7.34 (m, 3H, Trp-H<sub>arom</sub>, Fmoc-H<sub>arom</sub>), 7.15 (dd,  $J$  = 7.0 Hz,  $J$  = 1.0 Hz, 1H, Trp-H<sub>arom</sub>), 7.10 (dd,  $J$  = 6.3 Hz,  $J$  = 1.0 Hz, 1H, Trp-H<sub>arom</sub>), 7.03–7.07 (m, 1H, Trp-H<sub>arom</sub>), 7.01 (d,  $J$  = 7.6 Hz, 1H, CHNHAsn), 6.73 (m, 2H, CHNHTrp, C-1-NH), 5.43 (d,  $J$  = 6.9 Hz, 1H, CHNHFmoc), 5.34–5.38 (m, 1H, H-4), 5.07–5.15 (m, 2H, H-1, H-2), 5.05 ( $J_{3,2}$  = 10.2 Hz,  $J_{3,4}$  = 3.0 Hz, 1H, H-3), 4.71 (q,  $J$  = 6.7 Hz, 1H, CHNHTrp), 4.53–4.61 (m, 1H, CHNHAsn), 4.31–4.39 (m, 1H, Fmoc-CH<sub>2</sub>), 4.13–4.30 (m, 4H, H-6a, CHNHFmoc, Fmoc-CH, Fmoc-CH<sub>2</sub>), 4.01 (dd,  $J_{6b,6a}$  = 11.4 Hz,  $J_{6b,5}$  = 5.8 Hz, H-6b), 3.84–3.92 (m, 1H, H-5), 3.24–3.33 (m, 2H, Trp-CH<sub>2</sub>), 2.67 (dd,  $J$  = 15.8 Hz,  $J$  = 3.9 Hz, 1H, Asn-CH<sub>2</sub>), 2.55 (dd,  $J$  = 15.7 Hz,  $J$  = 4.7 Hz, 1H, Asn-CH<sub>2</sub>), 2.04, 2.01, 1.93, 1.92 (s, 12H, CH<sub>3</sub>), 1.43 (s, 9H, C(CH<sub>3</sub>)<sub>3</sub>), 1.34 (d,  $J$  = 7.0 Hz, 3H, Ala-CH<sub>3</sub>).

**<sup>13</sup>C NMR** (75 MHz, CDCl<sub>3</sub>):  $\delta$  = 172.1, 171.0, 170.7, 170.6, 170.5, 170.0, 169.8, 169.1 (AcC=O, <sup>t</sup>BuC=O, NHC=O), 154.4 (NHC=O), 143.8, 141.3, 136.1 (C<sub>q,arom</sub>), 127.8 (Fmoc-C<sub>arom</sub>), 127.5 (C<sub>q,arom</sub>), 127.1 (Trp-C<sub>arom</sub>, Fmoc-C<sub>arom</sub>), 125.2 (Fmoc-C<sub>arom</sub>), 123.2, 122.3

(Trp-C<sub>arom</sub>), 120.0 (Fmoc-C<sub>arom</sub>), 119.6, 118.7, 111.4 (Trp-C<sub>arom</sub>), 110.0 (C<sub>q,arom</sub>), 82.5 (C(CH<sub>3</sub>)<sub>3</sub>), 78.4 (C-1), 72.5 (C-5), 70.9 (C-3), 68.0 (C-2), 67.2 (C-4), 67.0 (Fmoc-CH<sub>2</sub>), 61.4 (C-6), 53.8 (CHNHTrp), 50.6 (CHNHFmoc), 49.5 (CHNHAsn), 47.1 (Fmoc-CH), 37.8 (Asn-CH<sub>2</sub>), 27.9 (C(CH<sub>3</sub>)<sub>3</sub>), 27.6 (Trp-CH<sub>2</sub>), 20.7, 20.5, 20.3 (CH<sub>3</sub>), 18.7 (Ala-CH<sub>3</sub>).

$[\alpha]_D^{20} = +3.3$  ( $c = 1$ , CHCl<sub>3</sub>). **Mass Anal.** Calcd for C<sub>51</sub>H<sub>59</sub>N<sub>5</sub>O<sub>16</sub> [M+Na]<sup>+</sup>:  $m/z$  1020.38490; HRMS found [M+Na]<sup>+</sup>:  $m/z$  1020.38478. **Anal.** Calcd for C<sub>51</sub>H<sub>59</sub>N<sub>5</sub>O<sub>16</sub> C: 61.38%, H: 5.96%, N: 7.02%; found C: 61.72%, H: 6.39%, N: 7.09%.

***N*<sup>2</sup>-[*N*<sup>2</sup>-[*N*<sup>2</sup>-[(9*H*-Fluoren-9-ylmethoxy)carbonyl]alaninyl]tryptophyl]-*N*-(2,3,4,6-tetra-*O*-acetyl-β-*D*-mannopyranosyl)-*L*-asparagine-*tert*-butyl ester (**7c**)**

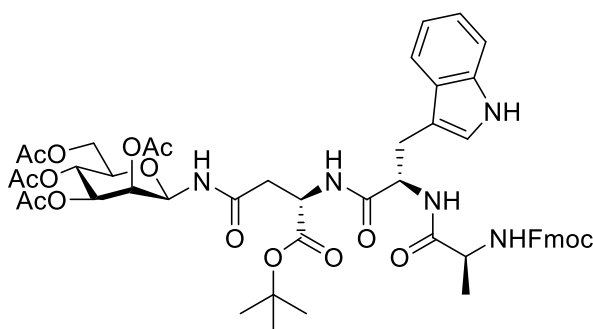

According to General Procedure D, **7c** was obtained from **5c** and Fmoc-L-Ala-OH as a yellowish solid. Yield: 76% (Procedure D1)/58% (Procedure D2).

**<sup>1</sup>H NMR** (400 MHz, CDCl<sub>3</sub>):  $\delta = 8.31$  (br. s., 1H, Trp-NH), 7.76 (d,  $J = 7.6$  Hz, 2H, Fmoc-H<sub>arom</sub>), 7.54–7.62 (m, 3H, Trp-H<sub>arom</sub>, Fmoc-H<sub>arom</sub>), 7.36–7.43 (m, 2H, Fmoc-H<sub>arom</sub>), 7.28–7.34 (m, 2H, Fmoc-H<sub>arom</sub>), 7.22–7.27, 7.08–7.13, 7.05–7.08 (m, 3H, Trp-H<sub>arom</sub>), 7.01–7.05 (m, 2H, CHNHAsn, Trp-H<sub>arom</sub>), 6.82–6.90 (m, 2H, CHNHTrp, C-1-NH), 5.32–5.39 (m, 2H, H-1, CHNHFmoc), 5.31 (dd,  $J_{2,3} = 3.1$  Hz,  $J_{2,1} = 0.8$  Hz, 1H, H-2), 5.18–5.25 (m, 1H, H-4), 5.06 (dd,  $J_{3,4} = 10.1$  Hz,  $J_{3,2} = 3.2$  Hz, 1H, H-3), 4.76 (q,  $J = 6.7$  Hz, 1H, CHNHTrp), 4.39–4.45 (m, 1H, CHNHAsn), 4.34–4.39 (m, 1H, Fmoc-CH<sub>2</sub>),

4.19–4.32 (m, 3H, H-6a, CHNHFmoc, Fmoc-CH<sub>2</sub>), 4.14–4.19 (m, 1H, Fmoc-CH), 4.04–4.09 (m, 1H, H-6b), 3.71 (ddd,  $J_{5,4} = 9.7$  Hz,  $J_{5,6} = 4.8$  Hz,  $J_{5,6} = 1.8$  Hz, 1H, H-5), 3.34 (dd,  $J = 14.5$  Hz,  $J = 5.1$  Hz, 1H, Trp-CH<sub>2</sub>), 3.22 (dd,  $J = 14.8$  Hz,  $J = 5.5$  Hz, 1H, Trp-CH<sub>2</sub>), 2.53–2.66 (m, 2H, Asn-CH<sub>2</sub>), 2.04, 2.03, 1.99, 1.98 (s, 12H, CH<sub>3</sub>), 1.41 (s, 9H, C(CH<sub>3</sub>)<sub>3</sub>), 1.32 (d,  $J = 6.8$  Hz, 3H, Ala-CH<sub>3</sub>).

<sup>13</sup>C NMR (101 MHz, CDCl<sub>3</sub>):  $\delta = 172.2, 171.3, 170.8, 170.7, 170.0, 169.7, 169.4, 169.1$  (AcC=O, <sup>t</sup>BuC=O, NHC=O), 155.9 (NHC=O), 143.8, 143.7, 141.3, 136.1 (C<sub>q,arom</sub>), 127.8 (Fmoc-C<sub>arom</sub>), 127.5 (C<sub>q,arom</sub>), 127.1 (Fmoc-C<sub>arom</sub>), 125.1 (Trp-C<sub>arom</sub>), 125.1 (Fmoc-C<sub>arom</sub>), 123.3, 122.1 (Trp-C<sub>arom</sub>), 120.0 (Fmoc-C<sub>arom</sub>), 119.6, 118.7, 111.3 (Trp-C<sub>arom</sub>), 109.8 (C<sub>q,arom</sub>), 82.9 (C(CH<sub>3</sub>)<sub>3</sub>), 76.2 (C-1), 74.2 (C-5), 71.6 (C-3), 69.7 (C-2), 67.0 (Fmoc-CH<sub>2</sub>), 65.2 (C-4), 62.1 (C-6), 53.6 (CHNHTrp), 50.6 (CHNHFmoc), 49.5 (CHNHAsn), 47.0 (Fmoc-CH), 38.0 (Asn-CH<sub>2</sub>), 27.8 (C(CH<sub>3</sub>)<sub>3</sub>), 27.6 (Trp-CH<sub>2</sub>), 20.9, 20.7, 20.6 (CH<sub>3</sub>), 18.5 (Ala-CH<sub>3</sub>).

$[\alpha]_D^{20} = -13.6$  (c = 1, CHCl<sub>3</sub>). Mass Anal. Calcd for C<sub>51</sub>H<sub>59</sub>N<sub>5</sub>O<sub>16</sub> [M+Na]<sup>+</sup>: m/z 1020.38490; HRMS found [M+Na]<sup>+</sup>: m/z 1020.38353.

***N*<sup>2</sup>-[*N*<sup>2</sup>[*N*<sup>2</sup>-[(9*H*-Fluoren-9-ylmethoxy)carbonyl]alaninyl]tryptophyl]-*N*-(2,2',3,3',4,6,6'-hepta-*O*-acetyl- $\beta$ -D-maltosyl)-L-asparagine-*tert*-butyl ester (7d)**

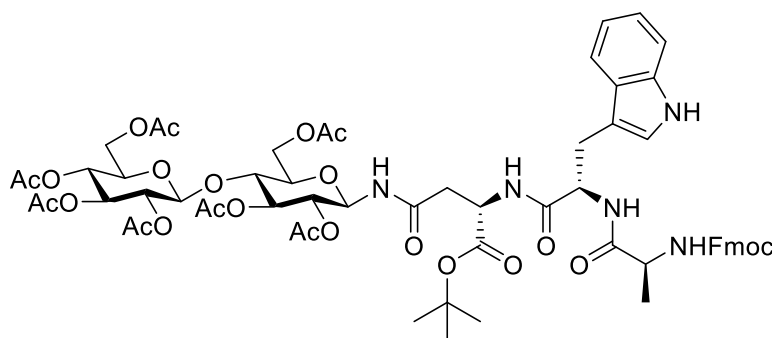

According to General Procedure D, **7d** was obtained from **5d** and Fmoc-L-Ala-OH as a white-yellow solid. Yield: 60% (Procedure D1)/68% (Procedure D2).

**<sup>1</sup>H NMR** (300 MHz, CDCl<sub>3</sub>): δ = 8.31 (s, 1H, Trp-NH), 7.76 (d, *J* = 7.4 Hz, 2H, Fmoc-H<sub>arom</sub>), 7.51–7.65 (m, 3H, Trp-H<sub>arom</sub>, Fmoc-H<sub>arom</sub>), 7.35–7.44, 7.26–7.34 (m, 4H, Fmoc-H<sub>arom</sub>), 7.22 (br. s., 1H, Trp-H<sub>arom</sub>), 7.08 – 7.15 (m, 1H, Trp-H<sub>arom</sub>), 7.00–7.08 (m, 3H, CHNHAsn, Trp-H<sub>arom</sub>), 6.81 (d, *J* = 6.9 Hz, 1H, CHNHTrp), 6.74 (d, *J* = 9.1 Hz, 1H, C-1-NH), 5.50 (d, *J* = 7.3 Hz, 1H, CHNHFmoc), 5.13–5.22 (m, 1H, H-3), 4.98–5.12 (m, 3H, H-1, H-3', H-4'), 4.82–4.93 (m, 2H, H-2, H-2'), 4.69–4.78 (m, 1H, CHNHTrp), 4.47–4.55 (m, 1H, CHNHAsn), 4.43 (d, *J*<sub>1',2'</sub> = 8.0 Hz, 1H, H-1'), 4.31–4.40 (m, 3H, Fmoc-CH<sub>2</sub>, H-6a, H-6b), 4.24–4.31 (m, 1H, Fmoc-CH<sub>2</sub>), 4.12–4.23 (m, 3H, CHNHFmoc, Fmoc-CH, H-6a'), 3.95 (dd, *J*<sub>6b',6a'</sub> = 12.3 Hz, *J*<sub>6b',5'</sub> = 1.7 Hz, 1H, H-6b'), 3.61–3.70 (m, 1H, H-4), 3.52–3.60 (m, 2H, H-5, H-5'), 3.26 (d, *J* = 5.7 Hz, 2H, Trp-CH<sub>2</sub>), 2.59 (dd, *J* = 15.7 Hz, *J* = 3.9 Hz, 1H, Asn-CH<sub>2</sub>), 2.51 (dd, *J* = 15.6 Hz, *J* = 4.9 Hz, 1H, Asn-CH<sub>2</sub>), 2.04, 2.00, 1.98, 1.97, 1.95 (s, 21H, CH<sub>3</sub>), 1.42 (s, 9H, C(CH<sub>3</sub>)<sub>3</sub>), 1.33 (d, *J* = 6.8 Hz, 3H, Ala-CH<sub>3</sub>).

**<sup>13</sup>C NMR** (75 MHz, CDCl<sub>3</sub>): δ = 172.3, 170.9, 170.8, 170.8, 170.5, 170.4, 170.2, 169.5, 169.3, 168.9 (AcC=O, <sup>t</sup>BuC=O, NHC=O), 155.9 (NHC=O), 143.8, 143.8, 141.2, 136.1 (C<sub>q,arom</sub>), 127.8 (Fmoc-C<sub>arom</sub>), 127.5 (C<sub>q,arom</sub>), 127.1, 125.1 (Fmoc-C<sub>arom</sub>), 123.1, 122.1 (Trp-C<sub>arom</sub>), 120.0 (Fmoc-C<sub>arom</sub>), 119.5, 118.7, 111.3 (Trp-C<sub>arom</sub>), 109.9 (C<sub>q,arom</sub>), 100.6 (C-1'), 82.6 (C(CH<sub>3</sub>)<sub>3</sub>), 77.9 (C-1), 76.3 (C-5), 74.8 (C-5'), 72.8 (C-3'), 72.4 (C-3), 71.9 (C-4), 71.5 (C-2'), 70.6 (C-2), 67.7 (C-4'), 67.0 (Fmoc-CH<sub>2</sub>), 61.7 (C-6), 61.5 (C-6'), 53.8 (CHNHTrp), 50.6 (CHNHFmoc), 49.6 (CHNHAsn), 47.1 (Fmoc-CH), 37.8 (Asn-CH<sub>2</sub>), 27.8 (C(CH<sub>3</sub>)<sub>3</sub>), 27.6 (Trp-CH<sub>2</sub>), 20.8, 20.6, 20.5, 20.4 (CH<sub>3</sub>), 18.7 (Ala-CH<sub>3</sub>).

**[α]<sub>D</sub><sup>20</sup>** = -1.3 (c = 0.5, CHCl<sub>3</sub>). **Mass Anal.** Calcd for C<sub>63</sub>H<sub>75</sub>N<sub>5</sub>O<sub>24</sub> [M+Na]<sup>+</sup>: m/z 1308.46942; **HRMS** found [M+Na]<sup>+</sup>: m/z 1308.46697. **Anal.** Calcd for C<sub>63</sub>H<sub>75</sub>N<sub>5</sub>O<sub>24</sub> C: 58.83 %, H: 5.88%, N: 5.44%; found C: 59.02%, H: 6.18%, N: 5.33%.

***N*<sup>2</sup>-[*N*<sup>2</sup>-[(9*H*-Fluoren-9-ylmethoxy)carbonyl]alaninyl]tryptophyl]-*N*-(2,2',3,3',4,6,6'-hepta-*O*-acetyl- $\beta$ -D-maltosyl)-L-asparagine-*tert*-butyl ester (**7e**)**

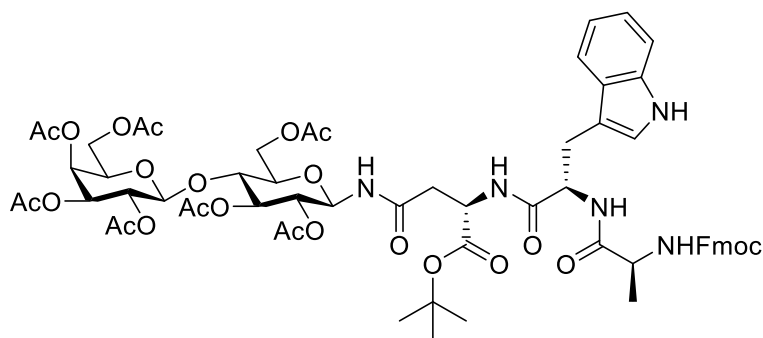

According to General Procedure D, **7e** was obtained from **5e** and Fmoc-L-Ala-OH as a colorless solid. Yield: 75% (Procedure D1)/65% (Procedure D2).

**<sup>1</sup>H NMR** (400 MHz, CDCl<sub>3</sub>):  $\delta$  = 8.22 (br. s., 1H, Trp-NH), 7.77 (d,  $J$  = 7.6 Hz, 2H, Fmoc-H<sub>arom</sub>), 7.55–7.64 (m, 3H, Trp-H<sub>arom</sub>, Fmoc-H<sub>arom</sub>), 7.36–7.44 (m, 2H, Trp-H<sub>arom</sub>), 7.27–7.35 (m, 2H, Fmoc-H<sub>arom</sub>), 7.23 (br. s., 1H, Trp-H<sub>arom</sub>), 7.10–7.16, 7.03–7.09 (m, 3H, Trp-H<sub>arom</sub>), 6.99 (d,  $J$  = 7.3 Hz, 1H, CHNH<sub>Asn</sub>), 6.71 (d,  $J$  = 6.6 Hz, 1H, CHNH<sub>Trp</sub>), 6.64 (d,  $J$  = 9.0 Hz, 1H, C-1-NH), 5.44 (d,  $J$  = 7.0 Hz, 1H, CHNH<sub>Fmoc</sub>), 5.30–5.33 (m, 1H, H-4'), 5.16–5.23 (m, 1H, H-3), 5.02–5.12 (m, 2H, H-1, H-2'), 4.92 (dd,  $J_{3',2'} = 10.4$  Hz,  $J_{3',4'} = 3.4$  Hz, 1H, H-3'), 4.82–4.89 (m, 1H, H-2), 4.70–4.77 (m, 1H, CHNH<sub>Trp</sub>), 4.49–4.55 (m, 1H, CHNH<sub>Asn</sub>), 4.33–4.43 (m, 3H, Fmoc-CH<sub>2</sub>, H-6a, H-1'), 4.14–4.31 (m, 4H, Fmoc-CH, CHNH<sub>Fmoc</sub>, Fmoc-CH<sub>2</sub>, H-6b), 3.99–4.09 (m, 1H, H-6a', H-6b'), 3.77–3.83 (m, 1H, H-5'), 3.64–3.71 (m, 1H, H-4), 3.56–3.63 (m, 1H, H-5), 3.21–3.33 (m, 2H, Trp-CH<sub>2</sub>), 2.60 (dd,  $J$  = 15.6 Hz,  $J$  = 3.9 Hz, 1H, Asn-CH<sub>2</sub>), 2.48 (dd,  $J$  = 15.4 Hz,  $J$  = 4.5 Hz, 1H, Asn-CH<sub>2</sub>), 2.14, 2.05, 2.03, 2.02, 1.99, 1.96 (s, 21H, CH<sub>3</sub>), 1.42 (s, 9H, C(CH<sub>3</sub>)<sub>3</sub>), 1.34 (d,  $J$  = 6.7 Hz, 3H, Ala-CH<sub>3</sub>).

**<sup>13</sup>C NMR** (101 MHz, CDCl<sub>3</sub>):  $\delta$  = 172.2, 170.9, 170.9, 170.5, 170.3, 170.1, 170.1, 169.4, 168.9 (AcC=O, <sup>t</sup>BuC=O, NHC=O), 155.9 (NHC=O), 143.8, 143.8, 141.2, 136.1 (C<sub>q,arom</sub>), 127.8

(Fmoc-C<sub>arom</sub>), 127.5 (C<sub>q,arom</sub>), 127.1, 125.1 (Fmoc-C<sub>arom</sub>), 123.1, 122.2 (Trp-C<sub>arom</sub>), 120.0 (Fmoc-C<sub>arom</sub>), 119.6, 118.8, 111.3 (Trp-C<sub>arom</sub>), 110.0 (C<sub>q,arom</sub>), 100.9 (C-1'), 82.6 (C(CH<sub>3</sub>)<sub>3</sub>), 77.8 (C-1), 76.1 (C-4), 74.8 (C-5), 72.6 (C-3), 70.9 (C-3'), 70.7, 70.6 (C-2, C-5'), 69.0 (C-2'), 67.0 (Fmoc-CH<sub>2</sub>), 66.6 (C-4'), 61.8 (C-6), 60.7 (C-6'), 53.7 (CHNHTrp), 50.6 (CHNHFmoc), 49.6 (CHNHAsn), 47.1 (Fmoc-CH), 37.8 (Asn-CH<sub>2</sub>), 27.8 (C(CH<sub>3</sub>)<sub>3</sub>), 27.6 (Trp-CH<sub>2</sub>), 20.9, 20.7, 20.7, 20.6, 20.5 (CH<sub>3</sub>), 18.6 (Ala-CH<sub>3</sub>).

$[\alpha]_D^{20} = +0.3$  (c = 0.5, CHCl<sub>3</sub>). **Mass Anal.** Calcd for C<sub>63</sub>H<sub>75</sub>N<sub>5</sub>O<sub>24</sub> [M+Na]<sup>+</sup>: m/z 1308.46942; HRMS found [M+Na]<sup>+</sup>: m/z 1308.46825. **Anal.** Calcd for C<sub>63</sub>H<sub>75</sub>N<sub>5</sub>O<sub>24</sub> C: 58.83%, H: 5.88%, N: 5.44%; found C: 58.56%, H: 5.97%, N: 5.47%.

***N*<sup>2</sup>-[*N*<sup>2</sup>-[(9*H*-Fluoren-9-ylmethoxy)carbonyl]alaninyl]tryptophyl]-*N*-(2,2',3,3',4,6,6'-hepta-*O*-acetyl-β-*D*-maltosyl)-*L*-asparagine-*tert*-butyl ester (**7f**)**

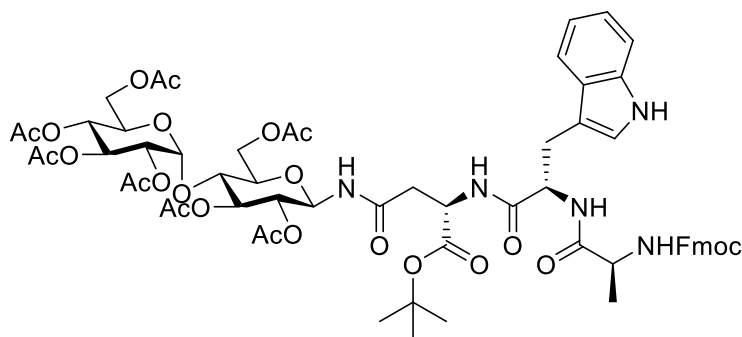

According to General Procedure D, **7f** was obtained from **5f** and Fmoc-L-Ala-OH as a white-yellow solid. Yield: 58% (Procedure D1)/50% (Procedure D2).

**<sup>1</sup>H NMR** (300 MHz, CDCl<sub>3</sub>): δ = 8.42 (br. s., 1H, Trp-NH), 7.78 (d, *J* = 7.4 Hz, 2H, Fmoc-H<sub>arom</sub>), 7.52–7.63 (m, 3H, Trp-H<sub>arom</sub>, Fmoc-H<sub>arom</sub>), 7.35–7.45, 7.26–7.34 (m, 2H, Fmoc-H<sub>arom</sub>), 7.22 (s, 1H, Trp-H<sub>arom</sub>), 7.08–7.15 (m, 1H, Trp-H<sub>arom</sub>), 7.00–7.08 (m, 3H, CHNHAsn, Trp-H<sub>arom</sub>), 6.86 (d, *J* = 6.8 Hz, 1H, CHNHTrp), 6.70 (d, *J* = 9.3 Hz, 1H, C-1-NH), 5.50 (d, *J* = 7.2 Hz, 1H, CHNHFmoc), 5.32–5.40 (m, 2H, H-1', H-3'), 5.18–5.27 (m, 1H, H-3),



5.00–5.13 (m, 2H, H-1, H-4'), 4.84 (dd,  $J_{2',3'} = 10.6$  Hz,  $J_{2',1'} = 4.0$  Hz, 1H, H-2'), 4.69–4.80 (m, 2H, H-2,  $\underline{\text{CHNHTrp}}$ ), 4.46–4.55 (m, 1H,  $\underline{\text{CHNHAsn}}$ ), 4.31–4.42 (m, 2H, Fmoc-CH<sub>2</sub>, H-6a), 4.12–4.30 (m, 5H, H-6a', H-6b, Fmoc-CH<sub>2</sub>, Fmoc-CH,  $\underline{\text{CHNHFmoc}}$ ), 4.05 (dd,  $J_{6b',6a'} = 12.3$  Hz,  $J_{6b',5} = 1.7$  Hz, H-6b'), 3.81–3.93 (m, 2H, H-4, H-5'), 3.48–3.59 (m, 1H, H-5), 3.19–3.34 (m, 2H, Trp-CH<sub>2</sub>), 2.60 (dd,  $J = 15.9$  Hz,  $J = 3.9$  Hz, 1H, Asn-CH<sub>2</sub>), 2.51 (dd,  $J = 15.8$  Hz,  $J = 4.8$  Hz, 1H, Asn-CH<sub>2</sub>), 2.06, 2.05, 2.04, 2.02, 2.00, 1.98, 1.95 (s, 21H, CH<sub>3</sub>), 1.42 (s, 9H, C(CH<sub>3</sub>)<sub>3</sub>), 1.32 (d,  $J = 6.7$  Hz, 3H, Ala-CH<sub>3</sub>).

<sup>13</sup>C NMR (75 MHz, CDCl<sub>3</sub>):  $\delta = 172.3, 170.9, 170.8, 170.7, 170.6, 170.4, 169.9, 169.8, 169.4, 169.0$  (AcC=O, <sup>t</sup>BuC=O, NHC=O), 155.9 (NHC=O), 143.8, 141.3, 136.6 (C<sub>q,arom</sub>), 127.8 (Fmoc-C<sub>arom</sub>), 127.5 (C<sub>q,arom</sub>), 127.1, 125.2 (Fmoc-C<sub>arom</sub>), 123.1, 122.1 (Trp-C<sub>arom</sub>), 120.0 (Fmoc-C<sub>arom</sub>), 119.5, 118.6, 111.4 (Trp-C<sub>arom</sub>), 109.8 (C<sub>q,arom</sub>), 95.5 (C-1'), 82.5 (C(CH<sub>3</sub>)<sub>3</sub>), 77.5 (C-1), 75.3 (C-3), 74.0 (C-5), 72.4 (C-5'), 71.1 (C-2), 69.9 (C-2'), 69.3 (C-3'), 68.4 (C-4), 67.9 (C-4'), 67.0 (Fmoc-CH<sub>2</sub>), 62.4 (C-6), 61.3 (C-6'), 53.8 (CHNHTrp), 50.6 (CHNHFmoc), 49.6 (CHNHAsn), 47.1 (Fmoc-CH), 37.7 (Asn-CH<sub>2</sub>), 27.8 (C(CH<sub>3</sub>)<sub>3</sub>), 27.5 (Trp-CH<sub>2</sub>), 20.8, 20.6, 20.6 (CH<sub>3</sub>), 18.6 (Ala-CH<sub>3</sub>).

$[\alpha]_{\text{D}}^{20} = +43.1$  ( $c = 1$ , CHCl<sub>3</sub>). **Mass Anal.** Calcd for C<sub>63</sub>H<sub>75</sub>N<sub>5</sub>O<sub>24</sub> [M+Na]<sup>+</sup>:  $m/z$  1308.46942; HRMS found [M+Na]<sup>+</sup>:  $m/z$  1308.46811. **Anal.** Calcd for C<sub>63</sub>H<sub>75</sub>N<sub>5</sub>O<sub>24</sub> C: 58.83%, H: 5.88%, N: 5.44%; found C: 59.02%, H: 6.14%, N: 5.37%.

***N*<sup>2</sup>-[*N*<sup>2</sup>-[(9*H*-Fluoren-9-ylmethoxy)carbonyl]alaninyl]tryptophyl]-*N*-(2,3,4,6-tetra-*O*-acetyl- $\beta$ -*D*-glucopyranosyl)-*L*-asparagine (**8a**)**

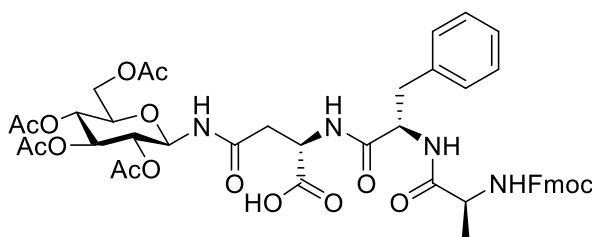

According to General Procedure E, **8a** was obtained from **6a** as a colorless solid. Yield: 99%.

**<sup>1</sup>H-NMR** (400 MHz, CDCl<sub>3</sub>):  $\delta$  = 7.77, 7.55 (d, *J* = 7.5 Hz, 4H, Fmoc-H<sub>arom</sub>), 7.38–7.45 (m, 2H, Fmoc-H<sub>arom</sub>), 7.32 (m, 3H, Fmoc-H<sub>arom</sub>, C-1-NH), 7.21–7.23 (m, 2H, Ph-H<sub>arom</sub>), 7.10–7.17 (m, 3H, Ph-H<sub>arom</sub>), 6.97 (d, *J* = 7.8 Hz, 1H, CHNHGln), 6.49 (d, *J* = 6.6 Hz, 1H, CHNHPh), 5.20–5.27 (m, 3H, H-3, H-1), 5.05–5.12 (m, 3H, H-4), 4.97 (s, 1H, H-2), 4.57 (q, *J* = 6.6 Hz, 1H, H-CHNHPh), 4.36–4.44 (m, 2H, CHNHGln, Fmoc-CH<sub>2</sub>), 4.19–4.28 (m, 2H, Fmoc-CH<sub>2</sub>, H-6b), 4.10–4.16 (m, 2H, CHNHFmoc, Fmoc-CH), 4.04–4.09 (m, 1H, H-6a), 3.74–3.81 (m, 1H, H-5), 3.13 (d, *J* = 6.1 Hz, 2H, Phe-CH<sub>2</sub>), 2.19–2.30 (m, 1H, Gln-C <sup>$\gamma$</sup> H<sub>2</sub>), 2.09–2.18 (m, 2H, Gln-C <sup>$\gamma$</sup> H<sub>2</sub>, Gln-C <sup>$\beta$</sup> H<sub>2</sub>), 2.06, 2.01, 1.97, 1.94 (s, 12H, CH<sub>3</sub>), 1.74–1.90 (m, 1H, Gln-C <sup>$\beta$</sup> H<sub>2</sub>), 1.38 (s, 9H, C(CH<sub>3</sub>)<sub>3</sub>), 1.32 (d, *J* = 7.1 Hz, 3H, Ala-CH<sub>3</sub>).

**<sup>13</sup>C-NMR** (101 MHz, CDCl<sub>3</sub>):  $\delta$  = 173.1, 172.4, 171.5 (NHCO), 170.8 (<sup>t</sup>BuC=O), 170.7, 170.3, 170.0, 169.5 (AcOC=O), 156.5 (NHCO), 143.5, 141.3, 136.0 (C<sub>q,arom</sub>), 129.1, 128.9 (Ph-C<sub>arom</sub>), 127.9 (Fmoc-C<sub>arom</sub>), 127.2 (Ph-C<sub>arom</sub>), 127.1, 124.5, 120.1 (Fmoc-C<sub>arom</sub>), 80.8 (C(CH<sub>3</sub>)<sub>3</sub>), 77.9 (C-1), 73.7 (C-5), 73.4 (C-3), 70.8 (C-2), 68.2 (C-4), 67.1 (Fmoc-CH<sub>2</sub>), 61.9 (C-6), 54.5 (CHNHPh), 52.9 (CHNHGln), 51.3 (Fmoc-CH), 47.0 (CHNHFmoc), 36.6 (Phe-CH<sub>2</sub>), 31.7 (Gln-C <sup>$\gamma$</sup> H<sub>2</sub>), 28.0 (C(CH<sub>3</sub>)<sub>3</sub>), 26.5 (Gln-C <sup>$\beta$</sup> H<sub>2</sub>), 20.8, 20.7, 20.6 (CH<sub>3</sub>), 17.7 (Ala-CH<sub>3</sub>).

$[\alpha]_D^{20}$  = -5.5 (*c* = 1, MeOH). **Mass Anal.** Calcd for C<sub>45</sub>H<sub>50</sub>N<sub>4</sub>O<sub>16</sub> [M+Na]<sup>+</sup>: *m/z* 925.31140; HRMS found [M+Na]<sup>+</sup>: *m/z* 925.30982.

***N*<sup>2</sup>-[*N*<sup>2</sup>-[(9*H*-Fluoren-9-ylmethoxy)carbonyl]alaninyl]tryptophyl]-*N*-(2,3,4,6-tetra-*O*-acetyl- $\beta$ -D-galactopyranosyl)-L-asparagine (**8b**)**

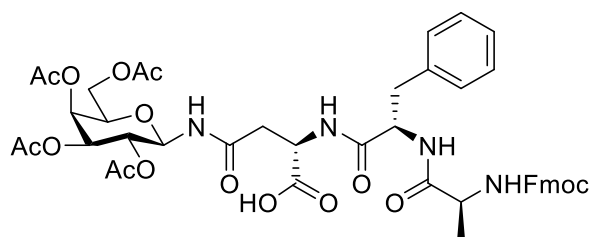

According to General Procedure E, **8b** was obtained from **6b** as a colorless solid. Yield: 99%.

**<sup>1</sup>H NMR** (300 MHz, CDCl<sub>3</sub>):  $\delta$  = 7.75 (d, *J* = 7.5 Hz, 2H, Fmoc-H<sub>arom</sub>), 7.52–7.61 (m, 3H, Fmoc-H<sub>arom</sub>, CHNHPhe), 7.34–7.43 (m, 2H, Fmoc-H<sub>arom</sub>), 7.29 (dd, *J* = 7.3 Hz, *J* = 2.1 Hz, 2H, Fmoc-H<sub>arom</sub>), 7.08–7.23 (m, 7H, Ph-H<sub>arom</sub>, C-1-NH, CHNHAsn), 6.37 (br. s., 1H, COOH), 5.76 (d, *J* = 6.3 Hz, 1H, CHNHFmoc), 5.40–5.45 (m, 1H, H-4), 5.22–5.35 (m, 1H, H1), 5.08–5.18 (m, 2H, H-2, H-3), 4.73–4.83 (m, 1H, CHNHAsn), 4.65–4.73 (m, 1H, CHNHPhe), 4.23–4.45 (m, 3H, CHNHFmoc, Fmoc-CH<sub>2</sub>), 4.11–4.22 (m, 2H, Fmoc-CH, H-6a), 3.95–4.11 (m, 2H, H-5, H-6b), 3.19 (dd, *J* = 14.3 Hz, *J* = 5.8 Hz, 1H, Asn-CH<sub>2</sub>), 2.98 (dd, *J* = 13.8 Hz, *J* = 8.3 Hz, 1H, Asn-CH<sub>2</sub>), 2.75–2.88 (m, 2H, Phe-CH<sub>2</sub>), 2.00, 2.00, 1.94 (s, 12H, CH<sub>3</sub>), 1.31 (d, *J* = 5.8 Hz, 3H, Ala-CH<sub>3</sub>).

**<sup>13</sup>C NMR** (75 MHz, CDCl<sub>3</sub>):  $\delta$  = 173.0, 171.7, 171.5, 171.2, 171.2, 170.3, 170.1 (AcC=O, COOH, NHC=O), 156.2 (NHC=O), 143.7, 141.3, 137.0, 135.9 (C<sub>q,arom</sub>), 129.2, 128.6 (Ph-C<sub>arom</sub>), 127.8 (Fmoc-C<sub>arom</sub>), 127.1 (Ph-C<sub>arom</sub>, Fmoc-C<sub>arom</sub>), 125.1 (Fmoc-C<sub>arom</sub>), 120.0 (Fmoc-C<sub>arom</sub>), 78.2 (C-1), 72.1 (C-5), 71.0 (C-2, C-3), 68.4 (C-2, C-3), 67.3 (C-4), 67.3 (Fmoc-CH<sub>2</sub>), 61.3 (C-6), 54.6 (CHNHAsn), 49.9 (CHNHFmoc), 49.2 (CHNHPhe), 47.0 (Fmoc-CH), 37.7 (Asn-CH<sub>2</sub>), 37.3 (Phe-CH<sub>2</sub>), 20.8, 20.6, 20.4 (CH<sub>3</sub>), 18.5 (Ala-CH<sub>3</sub>).

$[\alpha]_D^{20}$  = + 6.5 (*c* = 1, CHCl<sub>3</sub>). **Mass Anal.** Calcd for C<sub>45</sub>H<sub>50</sub>N<sub>4</sub>O<sub>16</sub> [M+Na]<sup>+</sup>: *m/z* 925.31140; HRMS found [M+Na]<sup>+</sup>: *m/z* 925.31087.

***N*<sup>2</sup>-[*N*<sup>2</sup>-[(9*H*-Fluoren-9-ylmethoxy)carbonyl]alaninyl]tryptophyl]-*N*-(2,3,4,6-tetra-*O*-acetyl- $\beta$ -D-mannopyranosyl)-L-asparagine (**8c**)**

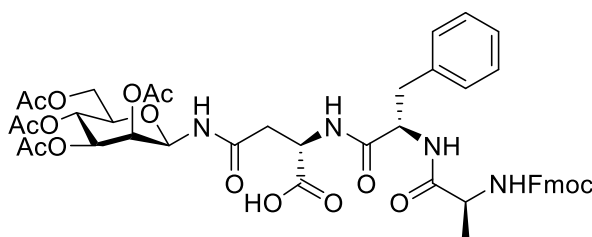

According to General Procedure E, **8c** was obtained from **6c** as a colorless solid. Yield: 99%.

**<sup>1</sup>H NMR** (300 MHz, CDCl<sub>3</sub>):  $\delta$  = 7.74 (d,  $J$  = 7.5 Hz, 2H, Fmoc-H<sub>arom</sub>), 7.66 (d,  $J$  = 5.1 Hz, 1H, CHNHPh), 7.55 (d,  $J$  = 7.0 Hz, 2H, Fmoc-H<sub>arom</sub>), 7.33–7.42 (m, 3H, CHNHAsn, Fmoc-H<sub>arom</sub>), 7.26–7.32 (m, 2H, Fmoc-H<sub>arom</sub>), 7.05–7.20 (m, 6H, Ph-H<sub>arom</sub>, C-1-NH), 5.66 (d,  $J$  = 6.0 Hz, 1H, CHNHFmoc), 5.50–5.58 (m, 1H, H-1), 5.34–5.40 (m, 1H, H-2), 5.14–5.26 (m, 3H, H-3, H-4), 5.06 (br. s., 1H, COOH), 4.72–4.83 (m, 1H, CHNHAsn), 4.61–4.71 (m, 1H, CHNHPh), 4.20–4.38 (m, 4H, H-6a, CHNHFmoc, Fmoc-CH<sub>2</sub>), 4.10–4.19 (m, 1H, Fmoc-CH), 4.03 (dd,  $J_{6b,6a}$  = 12.5 Hz,  $J_{6b,5}$  = 1.7 Hz, 1H, H-6b), 3.72–3.82 (m, 1H, H-5), 3.16 (dd,  $J$  = 13.9 Hz,  $J$  = 4.7 Hz, 1H, Asn-CH<sub>2</sub>), 2.90–3.02 (m, 1H, Asn-CH<sub>2</sub>), 2.75–2.87 (m, 2H, Phe-CH<sub>2</sub>), 2.11, 2.00, 1.98, 1.95 (s, 12H, CH<sub>3</sub>), 1.21–1.30 (m, 3H, Ala-CH<sub>3</sub>).

**<sup>13</sup>C NMR** (75 MHz, CDCl<sub>3</sub>):  $\delta$  = 172.3, 172.0, 171.6, 171.0, 170.9, 170.7, 170.3, 169.7 (AcC=O, COOH, NHC=O), 156.2 (NHC=O), 143.7, 141.2, 136.0 (C<sub>q,arom</sub>), 129.2, 128.5 (Ph-C<sub>arom</sub>), 127.8, 127.1 (Fmoc-C<sub>arom</sub>), 127.0 (Ph-C<sub>arom</sub>), 125.1 (Fmoc-C<sub>arom</sub>), 120.0 (Fmoc-C<sub>arom</sub>), 76.3 (C-1), 74.0 (C-5), 71.6 (C-3), 69.7 (C-2), 67.2 (Fmoc-CH<sub>2</sub>), 65.4 (C-4), 62.2 (C-6), 54.4 (CHNHAsn), 50.5 (CHNHFmoc), 49.1 (CHNHPh), 47.0 (Fmoc-CH), 38.2 (Asn-CH<sub>2</sub>), 37.7 (Phe-CH<sub>2</sub>), 20.8, 20.7, 20.6 (CH<sub>3</sub>), 18.3 (Ala-CH<sub>3</sub>).

$[\alpha]_D^{20}$  = – 3.9 ( $c$  = 0.5, CHCl<sub>3</sub>). **Mass Anal.** Calcd for C<sub>45</sub>H<sub>50</sub>N<sub>4</sub>O<sub>16</sub> [M+Na]<sup>+</sup>:  $m/z$  925.31140; HRMS found [M+Na]<sup>+</sup>:  $m/z$  925.31140.

***N*<sup>2</sup>-[*N*<sup>2</sup>-[(9*H*-Fluoren-9-ylmethoxy)carbonyl]alaninyl]tryptophyl]-*N*-(2,2',3,3',4,6,6'-hepta-*O*-acetyl-β-*D*-cellobiosyl)-*L*-asparagine (**8d**)**

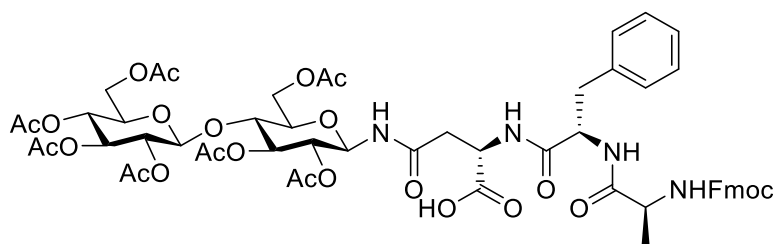

According to General Procedure E, **8d** was obtained from **6d** as a colorless solid. Yield: 99%.

**<sup>1</sup>H NMR** (400 MHz, CDCl<sub>3</sub>): δ = 7.74 (d, *J* = 7.5 Hz, 2H, Fmoc-H<sub>arom</sub>), 7.57 (m, 3H, CHNHPhe, Fmoc-H<sub>arom</sub>), 7.33–7.41 (m, 3H, C-1-NH, Fmoc-H<sub>arom</sub>), 7.26–7.32 (m, 3H, CHNHAsn, Fmoc-H<sub>arom</sub>), 7.07–7.22 (m, 5H, Ph-H<sub>arom</sub>), 5.75 – 5.86 (m, 1H, CHNHFmoc), 5.17–5.28 (m, 2H, H-1, H-3), 5.08–5.15 (m, 1H, H-3'), 5.00–5.08 (m, 1H, H-4'), 4.81–4.94 (m, 2H, H-2, H-2'), 4.72–4.79 (m, 1H, CHNHAsn), 4.64–4.71 (m, 1H, CHNHPhe), 4.45 (d, *J*<sub>1',2'</sub> = 7.7 Hz, 1H, H-1'), 4.21–4.42 (m, 5H, H-6a, H-6b, Fmoc-CH<sub>2</sub> CHNHFmoc), 4.10–4.20 (m, 2H, Fmoc-CH, H-6a'), 3.90–3.99 (m, 1H, H-6b'), 3.64–3.73 (m, 2H, H-4, H-5), 3.56–3.63 (m, 1H, H-5'), 3.15 (dd, *J* = 13.8 Hz, *J* = 4.7 Hz, 1H, Asn-CH<sub>2</sub>), 2.97 (d, *J* = 13.2 Hz, *J* = 8.0 Hz, 1H, Asn-CH<sub>2</sub>), 2.69 – 2.85 (m, 2H, Phe-CH<sub>2</sub>), 2.03, 2.02, 1.99, 1.98, 1.97, 1.95 (s, 21H, CH<sub>3</sub>), 1.29 (d, *J* = 6.5 Hz, 3H, Ala-CH<sub>3</sub>).

**<sup>13</sup>C NMR** (101 MHz, CDCl<sub>3</sub>): δ = 173.3, 171.8, 171.5, 171.1, 170.8, 170.6, 170.3, 169.9, 169.4, 169.3 (AcC=O, COOH, NHC=O), 156.2 (NHC=O), 143.7, 141.2, 135.9 (C<sub>q,arom</sub>), 129.2, 128.6 (Ph-C<sub>arom</sub>), 127.8 (Fmoc-C<sub>arom</sub>), 127.1 (Fmoc-C<sub>arom</sub>, Ph-C<sub>arom</sub>), 125.1, 120.0 (Fmoc-C<sub>arom</sub>), 100.7 (C-1'), 77.7 (C-1), 76.3 (C-4), 74.7 (C-5), 72.8 (C-3'), 72.5 (C-3), 71.9 (C-5'), 71.5 (C-2'), 70.6 (C-2), 67.7 (C-4'), 67.3 (Fmoc-CH<sub>2</sub>), 61.7 (C-6), 61.5 (C-6'), 54.5 (CHNHAsn), 50.4 (CHNHFmoc), 49.2 (CHNHPhe), 47.0 (Fmoc-CH), 37.6 (Asn-CH<sub>2</sub>), 37.4 (Phe-CH<sub>2</sub>), 20.8, 20.6, 20.5 (CH<sub>3</sub>), 18.4 (Ala-CH<sub>3</sub>).

$[\alpha]_D^{20} = -0.9$  ( $c = 0.5$ ,  $\text{CH}_2\text{Cl}_2$ ). **Mass Anal.** Calcd for  $\text{C}_{57}\text{H}_{66}\text{N}_4\text{O}_{24}$   $[\text{M}+\text{Na}]^+$ :  $m/z$  1213.39592; HRMS found  $[\text{M}+\text{Na}]^+$ :  $m/z$  1213.39566.

*N*<sup>2</sup>-[*N*<sup>2</sup>-[(9*H*-Fluoren-9-ylmethoxy)carbonyl]alaninyl]tryptophyl-*N*-(2,2',3,3',4,6,6'-hepta-*O*-acetyl- $\beta$ -D-lactosyl)-L-asparagine (**8e**)

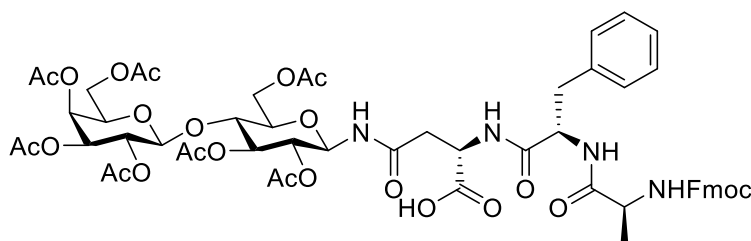

According to General Procedure E, **8e** was obtained from **6e** as a colorless solid. Yield: 99%.

**<sup>1</sup>H NMR** (400 MHz,  $\text{CDCl}_3$ ):  $\delta = 7.74$  (d,  $J = 7.5$  Hz, 2H, Fmoc- $\text{H}_{\text{arom}}$ ), 7.51–7.64 (m, 3H, Fmoc- $\text{H}_{\text{arom}}$ ,  $\text{CHNHPh}$ ), 7.34–7.42 (m, 3H, Fmoc- $\text{H}_{\text{arom}}$ , C-1-NH), 7.26–7.32 (m, 3H, Fmoc- $\text{H}_{\text{arom}}$ ,  $\text{CHNHAsn}$ ), 7.08–7.22 (m, 5H, Ph- $\text{H}_{\text{arom}}$ ), 5.77–5.90 (m, 1H,  $\text{CHNHFmoc}$ ), 5.67 (br. s., 1H, COOH), 5.30–5.34 (m, 1H, H-4'), 5.17–5.30 (m, 2H, H-1, H-3), 5.03–5.10 (m, 1H, H-2'), 4.93 (dd,  $J_{3',2'} = 10.6$  Hz,  $J_{3',4} = 2.1$  Hz, 1H, H-3'), 4.84–4.90 (m, 1H, H-2), 4.72–4.80 (m, 1H,  $\text{CHNHAsn}$ ), 4.63–4.71 (m, 1H,  $\text{CHNHPh}$ ), 4.43 (d,  $J_{1',2'} = 7.6$  Hz, 1H, H-1'), 4.22–4.40 (m, 4H, H-6a,  $\text{CHNHFmoc}$ , Fmoc- $\text{CH}_2$ ), 4.10–4.20 (m, 2H, H-6b, Fmoc-CH), 3.97–4.09 (m, 2H, H-6a', H-6b'), 3.78–3.76 (m, 1H, H-5'), 3.65–3.76 (m, 2H, H-4, H-5), 3.16 (dd,  $J = 11.0$  Hz,  $J = 2.5$  Hz, 1H, Asn- $\text{CH}_2$ ), 2.90–3.02 (m, 1H, Asn- $\text{CH}_2$ ), 2.67–2.78 (m, 2H, Phe- $\text{CH}_2$ ), 2.12, 2.01, 1.98, 1.95 (s, 21H,  $\text{CH}_3$ ), 1.29 (br. s., 3H, Ala- $\text{CH}_3$ ).

**<sup>13</sup>C NMR** (101 MHz,  $\text{CDCl}_3$ ):  $\delta = 173.2$ , 171.8, 171.5, 171.1, 170.8, 170.4, 170.2, 170.1, 169.8, 169.3 (AcC=O, COOH, NHC=O), 156.2 (NHC=O), 143.7, 141.2, 135.9 ( $\text{C}_{\text{q,arom}}$ ), 129.2, 128.5 (Ph- $\text{C}_{\text{arom}}$ ), 127.8 (Fmoc- $\text{C}_{\text{arom}}$ ), 127.1 (Ph- $\text{C}_{\text{arom}}$ , Fmoc- $\text{C}_{\text{arom}}$ ), 125.1, 120.0 (Fmoc- $\text{C}_{\text{arom}}$ ), 100.9 (C-1'), 77.7 (C-1), 76.0 (C-5), 74.7 (C-4), 72.8 (C-3), 70.9 (C-3'), 70.7 (C-2), 70.5

(C-5'), 69.0 (C-2'), 67.2 (Fmoc-CH<sub>2</sub>), 66.5 (C-4'), 61.8 (C-6), 60.6 (C-6'), 54.5 (CHNHAsn), 50.4 (CHNHFmoc), 49.2 (CHNHPh), 47.0 (Fmoc-CH), 37.6 (Asn-CH<sub>2</sub>), 37.4 (Phe-CH<sub>2</sub>), 20.8, 20.7, 20.6, 20.5 (CH<sub>3</sub>), 18.5 (Ala-CH<sub>3</sub>).

$[\alpha]_D^{20} = + 3.5$  (c = 1, CHCl<sub>3</sub>). **Mass Anal.** Calcd for C<sub>57</sub>H<sub>66</sub>N<sub>4</sub>O<sub>24</sub> [M+Na]<sup>+</sup>: m/z 1213.39592; HRMS found [M+Na]<sup>+</sup>: m/z 1213.39566.

***N*<sup>2</sup>-[*N*<sup>2</sup>[*N*<sup>2</sup>-[(9*H*-Fluoren-9-ylmethoxy)carbonyl]alaninyl]tryptophyl]-*N*-(2,2',3,3',4,6,6'-hepta-*O*-acetyl-β-*D*-maltosyl)-*L*-asparagine (**8f**)**

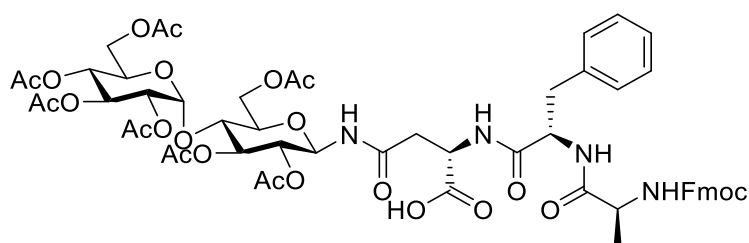

According to General Procedure E, **8f** was obtained from **6f** as a colorless solid. Yield: 99%.

<sup>1</sup>H NMR (400 MHz, CDCl<sub>3</sub>): δ = 7.75 (d, *J* = 7.3 Hz, 2H, Fmoc-H<sub>arom</sub>), 7.53–7.63 (m, 2H, Fmoc-H<sub>arom</sub>), 7.50 (d, *J* = 6.6 Hz, 1H, CHNHAsn/CHNHPh), 7.35–7.43 (m, 2H, Fmoc-H<sub>arom</sub>), 7.26–7.33 (m, 2H, Fmoc-H<sub>arom</sub>), 7.09–7.23 (m, 7H, CHNHAsn/CHNHPh, C-1-NH, Ph-H<sub>arom</sub>), 5.76 (br. s., 2H, COOH, CHNHFmoc), 5.29–5.39 (m, 4H, H-3, H-3', H-1'), 5.17–5.27 (m, 1H, H-1), 5.01–5.10 (m, 1H, H-4'), 4.78–4.89 (m, 2H, H-2, H-2'), 4.65–4.77 (m, 2H, CHNHPh, CHNHAsn), 4.33–4.44 (m, 2H, Fmoc-CH<sub>2</sub>, H-6a), 4.13–4.33 (m, 5H, CHNHFmoc, Fmoc-CH, Fmoc-CH<sub>2</sub>, H-6b, H-6a'), 4.00–4.09 (m, 1H, H-6b'), 3.86–3.96 (m, 2H, H-4, H-5'), 3.65–3.76 (m, 1H, H-5), 3.16 (dd, *J* = 13.9 Hz, *J* = 5.4 Hz, 1H, Asn-CH<sub>2</sub>), 2.94–3.00 (m, 1H, Asn-CH<sub>2</sub>), 2.68–2.83 (m, 2H, Phe-CH<sub>2</sub>), 2.07, 2.05, 2.02, 2.01, 1.99, 1.97, 1.95 (s, 21H, CH<sub>3</sub>), 1.30 (d, *J* = 5.6 Hz, 3H, Ala-CH<sub>3</sub>).

$^{13}\text{C}$  NMR (101 MHz,  $\text{CDCl}_3$ ):  $\delta$  = 173.3, 171.6, 171.5, 171.0, 170.9, 170.6, 170.1, 170.0, 169.5 (AcC=O, COOH, NHC=O), 155.8 (NHC=O), 143.7, 141.2, 135.8 ( $\text{C}_{\text{q,arom}}$ ), 129.2 (Ph- $\text{C}_{\text{arom}}$ ), 128.6 (Ph- $\text{C}_{\text{arom}}$ ), 127.8 (Fmoc- $\text{C}_{\text{arom}}$ ), 127.1 (Fmoc- $\text{C}_{\text{arom}}$ , Phe- $\text{C}_{\text{arom}}$ ), 125.1, 120.0 (Fmoc- $\text{C}_{\text{arom}}$ ), 95.3 (C-1'), 77.5 (C-1), 75.3 (C-3), 74.1 (C-5), 72.5 (C-5'), 71.0 (C-2), 70.0 (C-2'), 69.3 (C-3'), 68.5 (C-4), 67.9 (C-4'), 67.3 (Fmoc- $\text{CH}_2$ ), 62.5 (C-6), 61.4 (C-6'), 54.6 (CHNHAsn), 50.5 (CHNHFmoc), 49.3 (CHNHPh), 47.0 (Fmoc-CH), 37.5 (Asn- $\text{CH}_2$ , Phe- $\text{CH}_2$ ), 20.8, 20.8, 20.7, 20.6 ( $\text{CH}_3$ ), 18.4 (Ala- $\text{CH}_3$ ).

$[\alpha]_{\text{D}}^{20}$  = +29.7 ( $c$  = 0.5,  $\text{CHCl}_3$ ). Mass Anal. Calcd for  $\text{C}_{57}\text{H}_{66}\text{N}_4\text{O}_{24}$   $[\text{M}+\text{Na}]^+$ :  $m/z$  1213.39592; HRMS found  $[\text{M}+\text{Na}]^+$ :  $m/z$  1213.39827.

***N*<sup>2</sup>-[*N*<sup>2</sup>-[(9*H*-Fluoren-9-ylmethoxy)carbonyl]alaninyl]tryptophyl]-*N*-(2,3,4,6-tetra-*O*-acetyl- $\beta$ -*D*-glucopyranosyl)-*L*-asparagine (**9a**)**

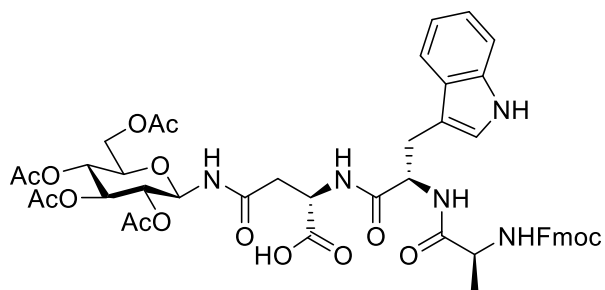

According to General Procedure E, **9a** was obtained from **7a** as a red solid. Yield: 99%.

$^1\text{H}$  NMR (300 MHz,  $\text{CDCl}_3$ ):  $\delta$  = 8.49 (br. s., 1H, Trp-NH), 7.75 (d,  $J$  = 7.4 Hz, 2H, Fmoc- $\text{H}_{\text{arom}}$ ), 7.49–7.62 (m, 3H, Trp- $\text{H}_{\text{arom}}$ , Fmoc- $\text{H}_{\text{arom}}$ ), 7.34–7.44 (m, 3H, Fmoc- $\text{H}_{\text{arom}}$ , CHNHAsn), 7.26–7.32 (m, 3H, Fmoc- $\text{H}_{\text{arom}}$ , CHNHTrp), 7.21 (d,  $J$  = 7.7 Hz, 1H, Trp- $\text{H}_{\text{arom}}$ ), 6.97–7.14 (m, 4H, Trp- $\text{H}_{\text{arom}}$ , C-1-NH), 5.77 (d,  $J$  = 6.7 Hz, 1H, CHNHFmoc), 5.22–5.31 (m, 1H, H-3), 5.11–5.21 (m, 1H, H-1), 4.97–5.06 (m, 1H, H-4), 4.84–4.95 (m, 1H, H-2), 4.71–4.81 (m, 1H, CHNHTrp), 4.55–4.64 (m, 1H, CHNHAsn), 4.09–4.41 (m, 6H, Fmoc-CH, CHNHFmoc, Fmoc- $\text{CH}_2$ , H-6a), 4.02 (dd,  $J_{6b,6a}$  = 11.6 Hz,  $J_{6b,5}$  = 0.6 Hz, 1H, H-6b),



3.65–3.75 (m, 1H, H-5), 3.14–3.31 (m, 2H, Trp-CH<sub>2</sub>), 2.60 (dd,  $J = 15.2$  Hz,  $J = 2.8$  Hz, 1H, Asn-CH<sub>2</sub>), 2.43–2.54 (m, 1H, Asn-CH<sub>2</sub>), 2.00, 1.97, 1.96, 1.95 (s, 12H, CH<sub>3</sub>), 1.26 (d,  $J = 9.1$  Hz, 3H, Ala-CH<sub>3</sub>).

<sup>13</sup>C NMR (75 MHz, CDCl<sub>3</sub>):  $\delta = 173.5$  (NHC=O), 172.2, 172.0, 171.5, 171.1, 171.0, 170.2, 169.7 (AcC=O, COOH, NHC=O), 156.3 (NHC=O), 143.7, 141.2, 136.1 (C<sub>q,arom</sub>), 127.8 (Fmoc-C<sub>arom</sub>), 127.4 (C<sub>q,arom</sub>), 127.1, 125.1 (Fmoc-C<sub>arom</sub>), 123.7, 122.1 (Trp-C<sub>arom</sub>), 120.0 (Fmoc-C<sub>arom</sub>), 119.5, 118.5, 111.5 (Trp-C<sub>arom</sub>), 109.2 (C<sub>q,arom</sub>), 77.9 (C-1), 73.6 (C-5), 72.8 (C-3), 70.5 (C-2), 68.1 (C-4), 67.4 (Fmoc-CH<sub>2</sub>), 67.3, 61.7 (C-6), 54.1 (CHNHTrp), 50.6 (CHNHFmoc), 48.9 (CHNHAsn), 46.9 (Fmoc-CH), 36.9 (Asn-CH<sub>2</sub>), 27.5 (Trp-CH<sub>2</sub>), 20.6, 20.5 (CH<sub>3</sub>), 18.2 (Ala-CH<sub>3</sub>).

$[\alpha]_D^{20} = +4.5$  ( $c = 0.5$ , CHCl<sub>3</sub>). **Mass Anal.** Calcd for C<sub>47</sub>H<sub>51</sub>N<sub>5</sub>O<sub>16</sub> [M+Na]<sup>+</sup>:  $m/z$  964.32230; HRMS found [M+Na]<sup>+</sup>:  $m/z$  964.32188.

***N*<sup>2</sup>-[*N*<sup>2</sup>-[(9*H*-Fluoren-9-ylmethoxy)carbonyl]alaninyl]tryptophyl]-*N*-(2,3,4,6-tetra-*O*-acetyl- $\beta$ -D-galactopyranosyl)-L-asparagine (**9b**)**

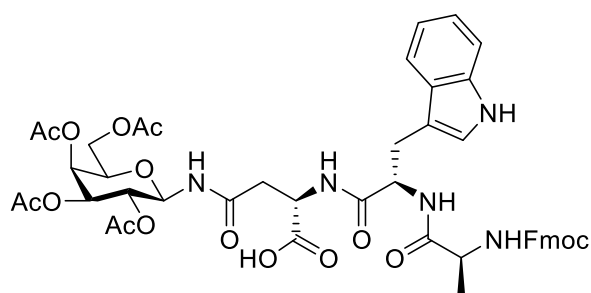

According to General Procedure E, **9b** was obtained from **7b** as a red solid. Yield: 99%.

<sup>1</sup>H NMR (300 MHz, CDCl<sub>3</sub>):  $\delta = 8.50$  (br. s., 1H, Trp-NH), 7.75 (d,  $J = 7.4$  Hz, 2H, Fmoc-H<sub>arom</sub>), 7.50–7.60 (m, 3H, Trp-H<sub>arom</sub>, Fmoc-H<sub>arom</sub>), 7.33–7.43 (m, CHNHAsn, CHNHTrp, Fmoc-H<sub>arom</sub>), 7.29 (d,  $J = 6.8$  Hz, 2H, H-Fmoc), 7.21 (br. s., 1H, Trp-H<sub>arom</sub>), 6.93–7.13 (m, 5H,

Trp-H<sub>arom</sub>, C-1-NH), 5.66 (d,  $J = 6.6$  Hz, 1H, CHNH $\underline{\text{Fmoc}}$ ), 5.34–5.41 (s, 1H, H-4), 5.04–5.23 (m, 3H, H-1, H-2, H-3), 4.72–4.83 (m, 1H, CHNH $\underline{\text{Trp}}$ ), 4.56–4.66 (m, 1H, CHNH $\underline{\text{Asn}}$ ), 4.21–4.40 (m, 4H, CHNH $\underline{\text{Fmoc}}$ , Fmoc-CH<sub>2</sub>), 4.10–4.20 (m, 1H, Fmoc-CH), 3.89–4.09 (m, 3H, H-5, H-6a, H-6b), 3.68 (br.s., 1H, COOH), 3.16–3.30 (m, 2H, Trp-CH<sub>2</sub>), 2.59–2.72 (m, 1H, Asn-CH<sub>2</sub>), 2.45–2.58 (m, 1H, Asn-CH<sub>2</sub>), 2.03, 1.96, 1.95, 1.94 (s, 12H, CH<sub>3</sub>), 1.25–1.32 (m, 3H, Ala-CH<sub>3</sub>).

<sup>13</sup>C NMR (75 MHz, CDCl<sub>3</sub>):  $\delta = 173.1, 172.1, 171.8, 171.3, 170.9, 170.1$  (AcC=O, COOH, NHC=O), 156.2 (NHC=O), 143.8, 143.7, 141.2, 136.1 (C<sub>q,arom</sub>), 127.8 (Fmoc-C<sub>arom</sub>), 127.4 (C<sub>q,arom</sub>), 127.1, 125.1 (Fmoc-C<sub>arom</sub>), 124.5, 122.0 (Trp-C<sub>arom</sub>), 120.0 (Fmoc-C<sub>arom</sub>), 119.5, 118.5, 111.5 (Trp-C<sub>arom</sub>), 109.3 (C<sub>q,arom</sub>), 78.2 (C-1), 72.2 (C-5), 70.9 (C-3), 68.3 (C-2), 67.3 (C-4, Fmoc-CH<sub>2</sub>), 61.4 (C-6), 61.2, 54.1 (CHNH $\underline{\text{Trp}}$ ), 50.5 (CHNH $\underline{\text{Fmoc}}$ ), 48.9 (CHNH $\underline{\text{Asn}}$ ), 47.0 (Fmoc-CH), 37.0 (Asn-CH<sub>2</sub>), 27.7 (Trp-CH<sub>2</sub>), 20.6, 20.5, 20.4 (CH<sub>3</sub>), 18.4 (Ala-CH<sub>3</sub>).

$[\alpha]_{\text{D}}^{20} = +7.7$  ( $c = 0.5$ , CHCl<sub>3</sub>). **Mass Anal.** Calcd for C<sub>47</sub>H<sub>51</sub>N<sub>5</sub>O<sub>16</sub> [M+Na]<sup>+</sup>:  $m/z$  964.32230; HRMS found [M+Na]<sup>+</sup>:  $m/z$  964.32289.

***N*<sup>2</sup>-[*N*<sup>2</sup>-[(9*H*-Fluoren-9-ylmethoxy)carbonyl]alaninyl]tryptophyl]-*N*-(2,3,4,6-tetra-*O*-acetyl- $\beta$ -D-mannopyranosyl)-L-asparagine (**9c**)**

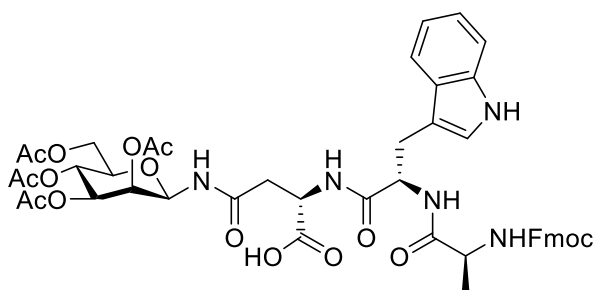

According to General Procedure E, **9c** was obtained from **7c** as a red solid. Yield: 99%.

**<sup>1</sup>H NMR** (400 MHz, CDCl<sub>3</sub>): δ = 8.61 (br. s., 1H, Trp-NH), 7.68–7.76 (m, 3H, Fmoc-H<sub>arom</sub>, CHNHAsn/CHNHTrp/C-1-NH), 7.49–7.61 (m, 3H, Trp-H<sub>arom</sub>, Fmoc-H<sub>arom</sub>), 7.32–7.40 (m, 3H, Fmoc-H<sub>arom</sub>, CHNHAsn/CHNHTrp/C-1-NH), 7.26–7.31 (m, 2H, Fmoc-H<sub>arom</sub>), 7.18–7.23 (m, 2H, CHNHAsn/CHNHTrp/C-1-NH, Trp-H<sub>arom</sub>), 6.91–7.08 (m, 3H, Trp-H<sub>arom</sub>), 5.63–6.19 (m, 2H, CHNH Fmoc, COOH), 5.39–5.51 (m, 1H, H-1), 5.29–5.38 (m, 1H, H-2), 5.08–5.24 (m, 2H, H-3, H-4), 4.71–4.86 (m, 1H, CHNHTrp), 4.50–4.66 (m, 1H, CHNHAsn), 4.09–4.42 (m, 5H, CHNH Fmoc, Fmoc-CH<sub>2</sub>, Fmoc-CH, H-6a), 3.95–4.08 (m, 1H, H-6b), 3.63–3.77 (m, 1H, H-5), 3.09–3.30 (m, 2H, Trp-CH<sub>2</sub>), 2.42–2.81 (m, 2H, Asn-CH<sub>2</sub>), 2.11, 1.99, 1.95 (s, 12H, CH<sub>3</sub>), 0.86–0.91 (m, 3H, Ala-CH<sub>3</sub>).

**<sup>13</sup>C NMR** (101 MHz, CDCl<sub>3</sub>): δ = 173.1, 171.9, 171.0, 170.4, 169.7 (AcC=O, COOH, NHC=O), 156.3 (NHC=O), 143.7, 141.2, 136.1 (C<sub>q,arom</sub>), 127.8 (Fmoc-C<sub>arom</sub>), 127.4 (C<sub>q,arom</sub>), 127.1, 125.1 (Fmoc-C<sub>arom</sub>), 123.7, 121.9 (Trp-C<sub>arom</sub>), 120.0 (Fmoc-C<sub>arom</sub>), 119.4, 118.5, 111.4 (Trp-C<sub>arom</sub>), 109.3 (C<sub>q,arom</sub>), 76.3 (C-1), 73.8 (C-5), 71.6 (C-3), 69.6 (C-2), 67.2 (Fmoc-CH<sub>2</sub>), 65.3 (C-4), 62.2 (C-6), 54.0 (CHNHTrp), 50.5 (CHNH Fmoc), 49.0 (CHNHAsn), 46.9 (Fmoc-CH), 37.1 (Asn-CH<sub>2</sub>), 26.7 (Trp-CH<sub>2</sub>), 20.8, 20.6, 20.5 (CH<sub>3</sub>), 14.1 (Ala-CH<sub>3</sub>).

$[\alpha]_D^{20} = -1.5$  (c = 0.5, CHCl<sub>3</sub>). **Mass Anal.** Calcd for C<sub>47</sub>H<sub>51</sub>N<sub>5</sub>O<sub>16</sub> [M+Na]<sup>+</sup>: m/z 964.32230; HRMS found [M+Na]<sup>+</sup>: m/z 964.32143.

***N*<sup>2</sup>-[*N*<sup>2</sup>-[(9*H*-Fluoren-9-ylmethoxy)carbonyl]alaninyl]tryptophyl]-*N*-(2,2',3,3',4,6,6'-hepta-*O*-acetyl-β-*D*-cellobiosyl)-*L*-asparagine (**9d**)**

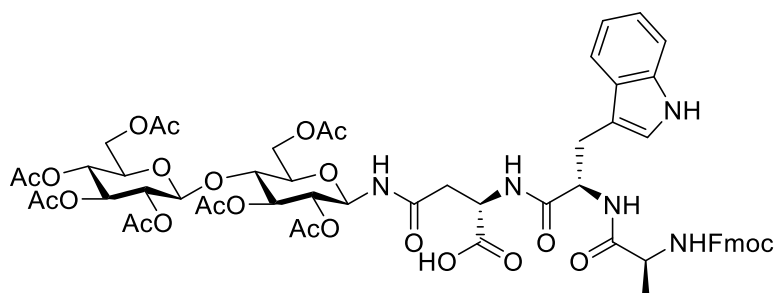

According to General Procedure E, **9d** was obtained from **7d** as a red solid. Yield: 99%.

**<sup>1</sup>H NMR** (400 MHz, CDCl<sub>3</sub>): δ = 8.58 (br. s., 1H, Trp-NH), 7.75 (d, *J* = 7.5 Hz, 2H, Fmoc-H<sub>arom</sub>), 7.50–7.61 (m, 3H, Fmoc-H<sub>arom</sub>, Trp-H<sub>arom</sub>), 7.34–7.47 (m, 3H, CHNHAsn, Fmoc-H<sub>arom</sub>), 7.28 (m, 3H, CHNHTrp, Fmoc-H<sub>arom</sub>), 7.18–7.24 (m, 1H, Trp-H<sub>arom</sub>), 6.96–7.13 (m, 4H, C-1-NH, Trp-H<sub>arom</sub>), 5.73–5.84 (m, 1H, CHNHFmoc), 5.58 (br. s., 1H, COOH), 5.18–5.26 (m, 1H, H-3), 5.08–5.17 (m, 2H, H-1, H-3'), 4.99–5.07 (m, 1H, H-4'), 4.80–4.93 (m, 2H, H-2, H-2'), 4.72–4.80 (m, 1H, CHNHTrp), 4.53–4.63 (m, 1H, CHNHAsn), 4.37–4.48 (m, 2H, H-1', H-6a), 4.21–4.36 (m, 4H, H-6b, CHNHFmoc, Fmoc-CH<sub>2</sub>), 4.12–4.20 (m, 1H, Fmoc-CH), 4.01–4.10 (m, 1H, H-6a'), 3.90–3.99 (m, 1H, H-6b'), 3.53–3.72 (m, 3H, H-4, H-5, H-5'), 3.14–3.29 (m, 2H, Trp-CH<sub>2</sub>), 2.57–2.70 (m, 1H, Asn-CH<sub>2</sub>), 2.41–2.51 (m, 1H, Asn-CH<sub>2</sub>), 2.03, 1.99, 1.98, 1.97, 1.94 (s, 21H, CH<sub>3</sub>), 1.25–1.31 (m, 3H, Ala-CH<sub>3</sub>).

**<sup>13</sup>C NMR** (101 MHz, CDCl<sub>3</sub>): δ = 174.2, 173.3, 171.9, 171.5, 171.2, 170.7, 170.6, 170.3, 169.9, 169.4, 169.3 (AcC=O, COOH, NHC=O), 156.3 (NHC=O), 143.7, 141.2, 136.1 (C<sub>q,arom</sub>), 127.8 (Fmoc-C<sub>arom</sub>), 127.4 (C<sub>q,arom</sub>), 127.1, 125.1 (Fmoc-C<sub>arom</sub>), 123.7, 122.0 (Trp-C<sub>arom</sub>), 120.0 (Fmoc-C<sub>arom</sub>), 119.5, 118.5, 111.5 (Trp-C<sub>arom</sub>), 109.3 (C<sub>q,arom</sub>), 100.7 (C-1'), 77.8 (C-1), 76.2 (C-5), 74.6 (C-5'), 72.8 (C-3'), 72.5 (C-3), 71.8 (C-4), 71.5 (C-2'), 70.6 (C-2), 67.7 (C-4'), 67.3 (Fmoc-CH<sub>2</sub>), 61.5 (C-6', C-6), 54.1 (CHNHTrp), 50.5 (CHNHAsn), 49.0 (CHNHFmoc), 46.9 (Fmoc-CH), 37.0 (Asn-CH<sub>2</sub>), 29.7 (Trp-CH<sub>2</sub>), 20.7, 20.6, 20.5 (CH<sub>3</sub>), 18.4 (Ala-CH<sub>3</sub>).

$[\alpha]_D^{20} = -0.2$  ( $c = 0.5$ ,  $\text{CHCl}_3$ ). **Mass Anal.** Calcd for  $\text{C}_{59}\text{H}_{67}\text{N}_5\text{O}_{24}$   $[\text{M}+\text{Na}]^+$ :  $m/z$  1252.40682; HRMS found  $[\text{M}+\text{Na}]^+$ :  $m/z$  1252.40764 .

***N*<sup>2</sup>-[*N*<sup>2</sup>-[(9*H*-Fluoren-9-ylmethoxy)carbonyl]alaninyl]tryptophyl]-*N*-(2,2',3,3',4,6,6'-hepta-*O*-acetyl- $\beta$ -D-lactosyl)-L-asparagine (**9e**)**

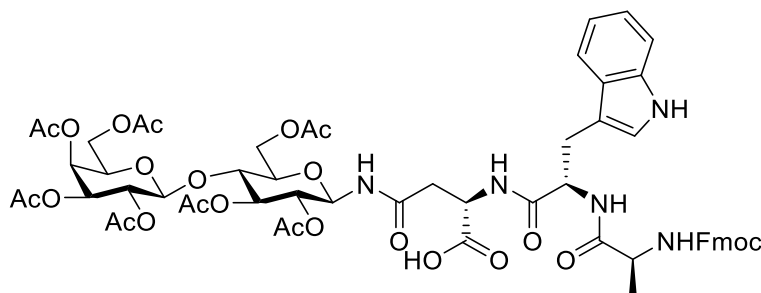

According to General Procedure E, **9e** was obtained from **7e** as a red solid. Yield: 99%.

**<sup>1</sup>H NMR** (400 MHz,  $\text{CDCl}_3$ ):  $\delta = 8.51$  (br. s., 1H, Trp-NH), 7.75 (d,  $J = 7.6$  Hz, 2H, Fmoc- $\text{H}_{\text{arom}}$ ), 7.51–7.60 (m, 3H, Trp- $\text{H}_{\text{arom}}$ , Fmoc- $\text{H}_{\text{arom}}$ ), 7.39 (m, 3H,  $\text{CHNHAsn}$ , Fmoc- $\text{H}_{\text{arom}}$ ), 7.29 (d,  $J = 5.4$  Hz, 3H,  $\text{CHNHTrp}$ , Fmoc- $\text{H}_{\text{arom}}$ ), 7.19–7.24 (m, 1H, Trp- $\text{H}_{\text{arom}}$ ), 6.98–7.12 (m, 4H, Trp- $\text{H}_{\text{arom}}$ , C-1-NH), 5.66–5.93 (m, 2H, COOH,  $\text{CHNHFmoc}$ ), 5.30–5.34 (d,  $J = 3.3$  Hz, 1H, H-4'), 5.19–5.26 (m, 1H, H-3), 5.04–5.15 (m, 2H, H-1, H-2'), 4.93 (dd,  $J_{3',4'} = 10.4$  Hz,  $J_{3',2'} = 3.4$  Hz, 1H, H-3'), 4.80–4.87 (m, 1H, H-2), 4.72–4.79 (m, 1H,  $\text{CHNHTrp}$ ), 4.45–4.62 (m, 1H,  $\text{CHNHAsn}$ ), 4.30–4.45 (m, 3H, H-1', H-6a, Fmoc- $\text{CH}_2$ ), 4.23–4.30 (m, 2H, Fmoc- $\text{CH}_2$ ,  $\text{CHNHFmoc}$ ), 4.12–4.19 (m, 1H, Fmoc-CH), 3.98–4.12 (m, 3H, H-6b, H-6a', H-6b'), 3.78–3.85 (m, 1H, H-5'), 3.66–3.74 (m, 1H, H-4), 3.58–3.65 (m, 1H, H-5), 3.23 (m, 2H, Trp- $\text{CH}_2$ ), 2.59–2.69, 2.40–2.49 (m, 1H, Asn- $\text{CH}_2$ ), 2.12, 2.02, 2.00, 1.99, 1.96 (s, 21H,  $\text{CH}_3$ ), 1.95 (br. s., 2H, H- $\text{CH}_3$ ), 1.28 (d,  $J = 6.4$  Hz, 3H, Ala- $\text{CH}_3$ ).

**<sup>13</sup>C NMR** (101 MHz,  $\text{CDCl}_3$ ):  $\delta = 173.5, 172.0, 171.9, 171.5, 171.2, 170.9, 170.5, 170.2, 170.2, 169.9, 169.3$  (AcC=O, COOH, NHC=O), 156.3 (NHC=O), 143.7, 141.2, 136.1 ( $\text{C}_{\text{q,arom}}$ ), 127.8 (Fmoc- $\text{C}_{\text{arom}}$ ), 127.4 ( $\text{C}_{\text{q,arom}}$ ), 127.1, 125.1 (Fmoc- $\text{C}_{\text{arom}}$ ), 123.6, 122.1 (Trp- $\text{C}_{\text{arom}}$ ), 120.1

(Fmoc-C<sub>arom</sub>), 119.5, 118.5, 111.5 (Trp-C<sub>arom</sub>), 109.2 (C<sub>q,arom</sub>), 100.9 (C-1'), 77.7 (C-1), 75.8 (C-4), 74.7 (C-5), 72.6 (C-3), 70.9, 70.7, 70.6 (C-3', C-5', C-2), 69.0 (C-2'), 67.3 (Fmoc-CH<sub>2</sub>), 66.5 (C-4'), 61.8 (C-6), 60.6 (C-6'), 54.1 (CHNHTrp), 50.5 (CHNHFmoc), 49.0 (CHNHAsn), 46.9 (Fmoc-CH), 37.0 (Asn-CH<sub>2</sub>), 27.5 (Trp-CH<sub>2</sub>), 20.7, 20.7, 20.6, 20.5 (CH<sub>3</sub>), 18.2 (Ala-CH<sub>3</sub>).

$[\alpha]_D^{20} = +1.5$  (c = 0.25, CHCl<sub>3</sub>). **Mass Anal.** Calcd for C<sub>59</sub>H<sub>67</sub>N<sub>5</sub>O<sub>24</sub> [M+Na]<sup>+</sup>: m/z 1252.40682; HRMS found [M+Na]<sup>+</sup>: m/z 1252.40520.

***N*<sup>2</sup>-[*N*<sup>2</sup>-[*N*<sup>2</sup>-[(9*H*-Fluoren-9-ylmethoxy)carbonyl]alaninyl]tryptophyl]-*N*-(2,2',3,3',4,6,6'-hepta-*O*-acetyl-β-*D*-maltosyl)-*L*-asparagine (**9f**)**

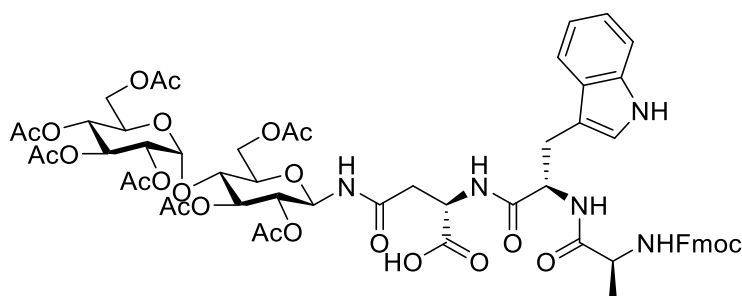

According to General Procedure E, **9f** was obtained from **7f** as a red solid. Yield: 99%.

**<sup>1</sup>H NMR** (400 MHz, CDCl<sub>3</sub>): δ = 8.56 (br. s., 1H, Trp-NH), 7.76 (d, *J* = 7.5 Hz, 2H, Fmoc-H<sub>arom</sub>), 7.56 (d, *J* = 7.3 Hz, 3H, Trp-H<sub>arom</sub>, Fmoc-H<sub>arom</sub>), 7.32–7.43 (m, 3H, CHNHAsn, Fmoc-H<sub>arom</sub>), 7.26–7.30 (m, 2H, Fmoc-H<sub>arom</sub>), 7.22 (br. s., 2H, Trp-H<sub>arom</sub>, CHNHTrp), 7.07–7.13, 7.00–7.06 (m, 3H, Trp-H<sub>arom</sub>), 6.90–6.98 (m, 1H, C-1-NH), 5.66–5.75 (m, 1H, CHNHFmoc), 5.33–5.40 (m, 2H, H-1', H-3'), 5.24–5.31 (m, 1H, H-3), 5.10–5.16 (m, 1H, H-1), 5.02–5.09 (m, 1H, H-4'), 4.84 (dd, *J*<sub>2',3'</sub> = 10.6 Hz, *J*<sub>2',1'</sub> = 4.0 Hz, 3H, H-2'), 4.68–4.80 (m, 2H, H-2, CHNHTrp), 4.60 (m, 1H, CHNHAsn), 4.30–4.43 (m, 2H, H-6a, Fmoc-CH<sub>2</sub>), 4.24–4.30 (m, 2H, Fmoc-CH<sub>2</sub>, CHNHFmoc), 4.21 (dd, *J*<sub>6a',6b'</sub> = 12.5 Hz, *J*<sub>6a',5'</sub> = 3.2 Hz, 2H,

H-6a'), 4.13–4.18 (m, 1H, Fmoc-CH), 4.10 (dd,  $J_{6b,6a} = 12.4$  Hz,  $J_{6b,5} = 3.3$  Hz, 1H, H-6b), 4.00–4.07 (m, 1H, H-6b'), 3.84–3.93 (m, 2H, H-4, H-5'), 3.51–3.64 (br. s., 1H, H-5), 3.16–3.33 (m, 2H, Trp-CH<sub>2</sub>), 2.56–2.68 (m, 1H, Asn-CH<sub>2</sub>), 2.35–2.46 (m, 1H, Asn-CH<sub>2</sub>), 2.07, 2.03, 2.02, 2.01, 2.00, 1.97, 1.94 (s, 21H, CH<sub>3</sub>), 1.27–1.33 (m, 3H, Ala-CH<sub>3</sub>).

<sup>13</sup>C NMR (101 MHz, CDCl<sub>3</sub>):  $\delta = 173.3, 171.9, 171.7, 171.4, 170.9, 170.7, 170.6, 170.1, 169.5$  (AcC=O, COOH, NHC=O), 156.3 (NHC=O), 143.7, 141.2, 136.1 (C<sub>q,arom</sub>), 127.9 (Fmoc-C<sub>arom</sub>), 127.4 (C<sub>q,arom</sub>), 127.1, 125.1 (Fmoc-C<sub>arom</sub>), 123.6, 122.1 (Trp-C<sub>arom</sub>), 120.1 (Fmoc-C<sub>arom</sub>), 119.6, 118.5, 111.5 (Trp-C<sub>arom</sub>), 109.2 (C<sub>q,arom</sub>), 95.6 (C-1'), 77.5 (C-1), 75.2 (C-3), 74.0 (C-5), 72.3 (C-5'), 71.1 (C-2), 70.0 (C-2'), 69.3 (C-3'), 68.5 (C-4), 67.9 (C-4'), 67.3 (Fmoc-CH<sub>2</sub>), 62.5 (C-6), 61.3 (C-6'), 54.1 (CHNHTrp), 50.5 (CHNHFmoc), 48.9 (CHNHAsn), 47.0 (Fmoc-CH), 37.0 (Asn-CH<sub>2</sub>), 27.6 (Trp-CH<sub>2</sub>), 20.9, 20.8, 20.7, 20.6, 20.6, 20.5 (CH<sub>3</sub>), 18.3 (Ala-CH<sub>3</sub>).

$[\alpha]_D^{20} = +22.3$  (c = 1, CHCl<sub>3</sub>). Mass Anal. Calcd for C<sub>59</sub>H<sub>67</sub>N<sub>5</sub>O<sub>24</sub> [M+Na]<sup>+</sup>: m/z 1252.40682; HRMS found [M+Na]<sup>+</sup>: m/z 1252.40616.

### *N*<sup>2</sup>-[*N*<sup>2</sup>[*N*<sup>2</sup>Alaninyl]phenylalaninyl]-*N*-(β-D-glucopyranosyl)-L-asparagine (**10a**)

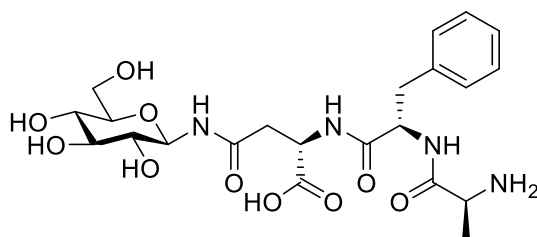

According to General Procedure F, **10a** was obtained from **8a** as a colorless solid. Yield: 98%.

<sup>1</sup>H NMR (300 MHz, D<sub>2</sub>O):  $\delta = 7.25$ – $7.39$  (m, 5H, Ph-H<sub>arom</sub>), 4.91 (d,  $J_{1,2} = 9.1$  Hz, 1H, H-1), 4.64 (dd,  $J = 9.4$  Hz,  $J = 5.7$  Hz, 1H, CHNHAsn), 4.41–4.48 (m, 1H, CHNHPh), 3.96 (q,  $J = 7.2$  Hz, 1H, CHNH<sub>2</sub>), 3.84 (dd,  $J_{6a,6b} = 12.5$  Hz,  $J_{6a,5} = 2.1$  Hz, 1H, H-6a), 3.68 (dd,  $J_{6b,6a} = 12.4$  Hz,  $J_{6b,5} = 5.2$  Hz, 1H, H-6b), 3.45–3.55 (m, 2H, H-3, H-5), 3.32–3.42 (m, 2H,

H-2, H-4), 3.21 (dd,  $J = 14.2$  Hz,  $J = 5.8$  Hz, 1H, Asn-CH<sub>2</sub>), 2.99 (dd,  $J = 14.1$  Hz,  $J = 9.5$  Hz, 1H, Asn-CH<sub>2</sub>), 2.74–2.82 (m, 2H, Phe-CH<sub>2</sub>), 1.48 (d,  $J = 7.2$  Hz, 3H, Ala-CH<sub>3</sub>).

<sup>13</sup>C NMR (101 MHz, CDCl<sub>3</sub>):  $\delta = 176.4, 175.6, 173.9, 172.0$  (NHC=O, COOH), 136.6 (C<sub>q,arom</sub>), 129.2, 128.7, 127.1 (Ph-C<sub>arom</sub>), 79.2 (C-1), 77.5 (C-5), 76.4 (C-3), 71.8, 69.2 (C-2, C-4), 60.5 (C-6), 54.8 (CHNHAsn), 51.5 (CHNHPh), 49.5 (CHNH<sub>2</sub>), 38.0 (Phe-CH<sub>2</sub>), 36.8 (Asn-CH<sub>2</sub>), 18.4 (Ala-CH<sub>3</sub>).

$[\alpha]_{\text{D}}^{20} = -0.5$  ( $c = 0.1$ , H<sub>2</sub>O). **Mass Anal.** Calcd for C<sub>22</sub>H<sub>32</sub>N<sub>4</sub>O<sub>10</sub> [M+H]<sup>+</sup>:  $m/z$  513.21912; HRMS found [M+H]<sup>+</sup>:  $m/z$  513.21934.

#### *N*<sup>2</sup>-[*N*<sup>2</sup>[*N*<sup>2</sup>Alaninyl]phenylalaninyl]-*N*-(β-D-galactopyranosyl)-L-asparagine (**10b**)

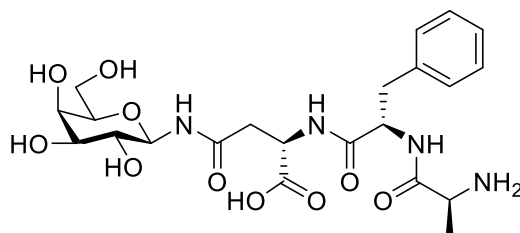

According to General Procedure F, **10b** was obtained from **8b** as a colorless solid. Yield: 96%.

<sup>1</sup>H NMR (400 MHz, D<sub>2</sub>O):  $\delta = 7.23$ –7.40 (m, 5H, H-Ph), 4.86 (d,  $J_{1,2} = 8.9$  Hz, 1H, H-1), 4.66 (dd,  $J = 9.3$  Hz,  $J = 6.0$  Hz, 1H, CHNHAsn), 4.37–4.46 (m, 1H, CHNHPh), 3.89–3.99 (m, 1H, H-3, CHNH<sub>2</sub>), 3.63–3.78 (m, 4H, H-4, H-5, H-6a, H-6b), 3.56–3.63 (m, 1H, H-2), 3.22 (dd,  $J = 13.6$  Hz,  $J = 5.0$  Hz, 1H, Asn-CH<sub>2</sub>), 2.98 (dd,  $J = 13.6$  Hz,  $J = 9.8$  Hz, 1H, Asn-CH<sub>2</sub>), 2.73–2.82 (m, 2H, Phe-CH<sub>2</sub>), 1.46 (dd,  $J = 7.0$  Hz, 3H, Ala-CH<sub>3</sub>).

<sup>13</sup>C NMR (101 MHz, D<sub>2</sub>O):  $\delta = 176.4, 173.9, 171.7, 170.6$  (NHC=O, COOH), 136.6 (C<sub>q,arom</sub>), 129.2, 128.7, 127.1 (Ph-C<sub>arom</sub>), 79.7 (C-1), 76.7 (C-5), 73.3, 69.3 (C-2, C-4), 68.6 (C-3), 61.0



(C-6), 55.2 (CHNHAsn), 51.5 (CHNHPh), 48.9 (CHNH<sub>2</sub>), 37.9 (Phe-CH<sub>2</sub>), 36.6 (Asn-CH<sub>2</sub>), 16.5 (Ala-CH<sub>3</sub>).

$[\alpha]_{\text{D}}^{20} = + 3.5$  (c = 0.1, H<sub>2</sub>O). **Mass Anal.** Calcd for C<sub>22</sub>H<sub>32</sub>N<sub>4</sub>O<sub>10</sub> [M+H]<sup>+</sup>: m/z 513.21912; HRMS found [M+H]<sup>+</sup>: m/z 513.21292.

***N*<sup>2</sup>-[*N*<sup>2</sup>[*N*<sup>2</sup>Alaninyl]phenylalaninyl]-*N*-(β-D-mannopyranosyl)-L-asparagine (**10c**)**

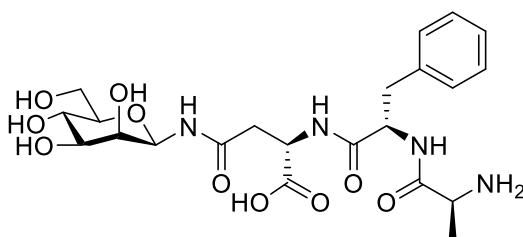

According to General Procedure F, **10c** was obtained from **8c** as a colorless solid. Yield: 66%.

**<sup>1</sup>H NMR** (300 MHz, D<sub>2</sub>O): δ = 7.32–7.40 (m, 2H, Ph-H<sub>arom</sub>), 7.25–7.32 (m, 3H, Ph-H<sub>arom</sub>), 5.16 (d, *J*<sub>1,2</sub> = 1.0 Hz, 1H, H-1), 4.65 (dd, *J* = 9.5 Hz, *J* = 5.5 Hz, 1H, CHNHAsn), 4.38–4.45 (m, 1H, CHNHPh), 3.92–3.99 (m, 1H, CHNH<sub>2</sub>), 3.90 (dd, *J*<sub>2,3</sub> = 3.3 Hz, *J*<sub>2,1</sub> = 1.0 Hz, 1H, H-2), 3.86 (dd, *J*<sub>6a,6b</sub> = 12.5 Hz, *J*<sub>6a,5</sub> = 2.3 Hz, 1H, H-6a), 3.67–3.73 (m, 1H, H-6b), 3.63–3.67 (m, 1H, H-3), 3.52–3.61 (m, 1H, H-4), 3.38–3.46 (m, 1H, H-5), 3.22 (dd, *J* = 14.2 Hz, *J* = 5.7 Hz, Asn-CH<sub>2</sub>), 2.99 (dd, *J* = 14.0 Hz, *J* = 9.5 Hz, 1H, Asn-CH<sub>2</sub>), 2.78 (dd, *J* = 6.3 Hz, *J* = 3.1 Hz, 2H, Phe-CH<sub>2</sub>), 1.46 (d, *J* = 7.2 Hz, 3H, Ala-CH<sub>3</sub>).

**<sup>13</sup>C NMR** (75 MHz, D<sub>2</sub>O): δ = 176.6, 176.3, 173.2, 171.7 (NHC=O, COOH), 136.6 (C<sub>q,arom</sub>), 129.1, 128.8, 127.1 (Ph-C<sub>arom</sub>), 77.7 (C-1), 77.6 (C-5), 73.3 (C-3), 70.1 (C-2), 66.4 (C-4), 60.9 (C-6), 55.1 (CHNHAsn), 51.6 (CHNHPh), 48.9 (CHNH<sub>2</sub>), 37.8 (Phe-CH<sub>2</sub>), 36.6 (Asn-CH<sub>2</sub>), 16.5 (Ala-CH<sub>3</sub>).

$[\alpha]_{\text{D}}^{20} = - 7.5$  (c = 0.1, H<sub>2</sub>O). **Mass Anal.** Calcd for C<sub>22</sub>H<sub>32</sub>N<sub>4</sub>O<sub>10</sub> [M+H]<sup>+</sup>: m/z 513.21912; HRMS found [M+H]<sup>+</sup>: m/z 513.21974.

***N*<sup>2</sup>-[*N*<sup>2</sup>[*N*<sup>2</sup>Alaninyl]phenylalaninyl]-*N*-(β-*D*-cellobiosyl)-*L*-asparagine (**10d**)**

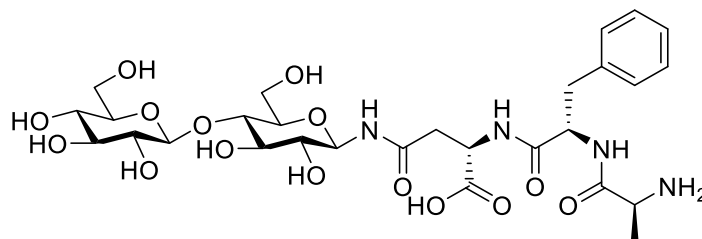

According to General Procedure F, **10d** was obtained from **8d** as a colorless solid. Yield: 61%.

**<sup>1</sup>H NMR** (600 MHz, D<sub>2</sub>O):  $\delta$  = 7.33–7.38 (m, 2H, Ph-H<sub>arom</sub>), 7.26–7.32 (m, 3H, Ph-H<sub>arom</sub>), 4.94 (dd,  $J_{1,2}$  = 9.2 Hz, 1H, H-1), 4.65 (dd,  $J$  = 9.4 Hz,  $J$  = 5.7 Hz, 1H, CHNHAsn), 4.49 (d,  $J_{1',2'}$  = 7.9 Hz, 1H, H-1'), 4.39–4.45 (m, 1H, CHNHPh), 3.95 (q,  $J$  = 6.9 Hz, 1H, CHNH<sub>2</sub>), 3.86–3.92 (m, 2H, H-6a, H-6a'), 3.78 ( $J_{6b,6a}$  = 12.5 Hz,  $J_{6b,5}$  = 3.7 Hz, 1H, H-6b), 3.71 ( $J_{6b',6a'}$  = 12.3 Hz,  $J_{6b',5'}$  = 5.7 Hz, 1H, H-6b'), 3.60–3.68 (m, 3H, H-3, H-4, H-5), 3.44–3.50 (m, 2H, H-3', H-5'), 3.37–3.44 (m, 2H, H-2, H-4'), 3.27–3.32 (m, 1H, H-2'), 3.22 (dd,  $J$  = 13.9 Hz,  $J$  = 5.3 Hz, 1H, Asn-CH<sub>2</sub>), 2.99 (dd,  $J$  = 13.9 Hz,  $J$  = 9.2 Hz, 1H, Asn-CH<sub>2</sub>), 2.73–2.82 (m, 2H, Phe-CH<sub>2</sub>), 1.47 (d,  $J$  = 7.0 Hz, 3H, Ala-CH<sub>3</sub>).

**<sup>13</sup>C NMR** (151 MHz, D<sub>2</sub>O):  $\delta$  = 176.4, 173.9, 171.8, 170.7 (NHC=O, COOH), 136.5 (C<sub>q,arom</sub>), 129.2, 128.8, 127.2 (Ph-C<sub>arom</sub>), 102.5 (C-1'), 79.1 (C-1), 78.1 (C-5), 76.3 (C-3), 76.0, 75.5 (C-3', C-5'), 74.9 (C-4), 73.1 (C-2'), 71.6 (C-2), 69.4 (C-4'), 60.6 (C-6'), 59.9 (C-6), 55.2 (CHNHAsn), 51.6 (CHNHPh), 48.9 (CHNH<sub>2</sub>), 38.1 (Phe-CH<sub>2</sub>), 36.7 (Asn-CH<sub>2</sub>), 16.5 (Ala-CH<sub>3</sub>).

$[\alpha]_D^{20}$  = – 1.6 (c = 0.1, H<sub>2</sub>O). **Mass Anal.** Calcd for C<sub>28</sub>H<sub>42</sub>N<sub>4</sub>O<sub>15</sub> [M+H]<sup>+</sup>: m/z 675.27194; HRMS found [M+H]<sup>+</sup>: m/z 675.27215.

***N*<sup>2</sup>-[*N*<sup>2</sup>[*N*<sup>2</sup>Alaninyl]phenylalaninyl]-*N*-(β-*D*-lactosyl)-*L*-asparagine (**10e**)**

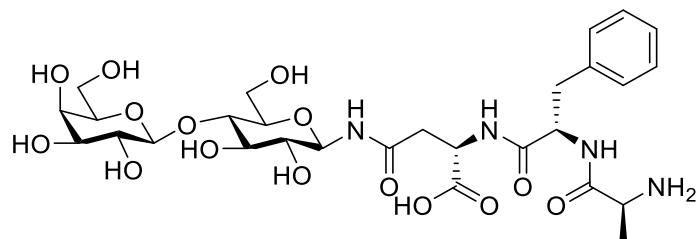

According to General Procedure F, **10e** was obtained from **8e** as a colorless solid. Yield: 80%.

**<sup>1</sup>H NMR** (600 MHz, D<sub>2</sub>O): δ = 7.33–7.39 (m, 2H, Ph-H<sub>arom</sub>), 7.26–7.32 (m, 3H, Ph-H<sub>arom</sub>), 4.90–4.99 (m, 1H, H-1), 4.61–4.69 (m, 1H, CHNHAsn), 4.39–4.47 (m, 2H, CHNHPh, H-1'), 3.85–3.93 (m, 3H, CHNH<sub>2</sub>, H-4', H-6a), 3.72–3.81 (m, 2H, H-6b, H-6a'), 3.60–3.72 (m, 6H, H-3, H-3', H-4, H-5, H-5', H-6b'), 3.50–3.56 (m, 1H, H-2'), 3.39–3.45 (m, 1H, H-2), 3.22 (dd, *J* = 13.7 Hz, *J* = 4.4 Hz, 1H, Asn-CH<sub>2</sub>), 2.99 (dd, *J* = 12.5 Hz, *J* = 9.9 Hz, 1H, Asn-CH<sub>2</sub>), 2.72–2.83 (m, 2H, Phe-CH<sub>2</sub>), 1.42 (d, *J* = 6.2 Hz, 3H, Ala-CH<sub>3</sub>).

**<sup>13</sup>C NMR** (151 MHz, D<sub>2</sub>O): δ = 178.9, 176.4, 174.4, 174.3 (NHC=O, COOH), 139.1 (C<sub>q,arom</sub>), 131.7, 131.3, 129.7 (Ph-C<sub>arom</sub>), 105.4 (C-1'), 81.6 (C-1), 80.3 (C-5), 78.9, 77.9, 77.5, 75.0 (C-3, C-3', C-4, C-5'), 74.1 (C-2), 73.5 (C-2'), 71.1 (C-4'), 63.6 (C-6'), 62.4 (C-6), 57.7 (CHNHAsn), 54.1 (CHNHPh), 51.3 (CHNH<sub>2</sub>), 40.5 (Phe-CH<sub>2</sub>), 39.3 (Asn-CH<sub>2</sub>), 19.5 (Ala-CH<sub>3</sub>).

[α]<sub>D</sub><sup>20</sup> = – 0.5 (c = 0.1, H<sub>2</sub>O). **Mass Anal.** Calcd for C<sub>28</sub>H<sub>42</sub>N<sub>4</sub>O<sub>15</sub> [M+H]<sup>+</sup>: *m/z* 675.27194;

HRMS found [M+H]<sup>+</sup>: *m/z* 675.27231.

***N*<sup>2</sup>-[*N*<sup>2</sup>[*N*<sup>2</sup>Alaninyl]phenylalaninyl]-*N*-(β-*D*-maltosyl)-*L*-asparagine (**10f**)**

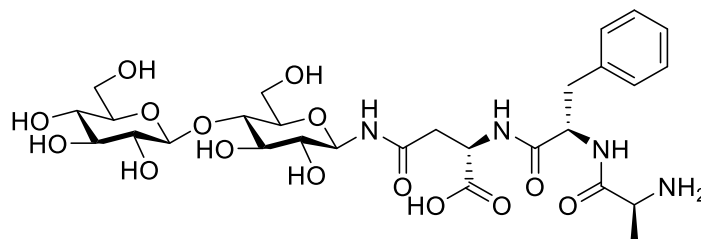

According to General Procedure F, **10f** was obtained from **8f** as a colorless solid. Yield: 99%.

**<sup>1</sup>H NMR** (600 MHz, D<sub>2</sub>O):  $\delta$  = 7.34–7.38, 7.26–7.31 (m, 5H, Phe-H<sub>arom</sub>), 5.39 (d,  $J_{1',2'}$  = 3.9 Hz, 1H, H-1'), 4.93 (d,  $J_{1,2}$  = 9.2 Hz, 1H, H-1), 4.65 (dd,  $J$  = 9.5 Hz,  $J$  = 5.5 Hz, 1H, CHNHAsn), 4.40–4.44 (m, 1H, CHNHPh), 3.82–3.87 (m, 4H, H-6a, CHNH<sub>2</sub>), 3.78–3.82 (m, 2H, H-3, H-6b), 3.71–3.75 (m, 2H, H-6a', H-6b'), 3.67–3.71 (m, 2H, H-5'), 3.60–3.67 (m, 3H, H-4, H-5, H-3'), 3.55 (dd,  $J_{2',3'}$  = 9.9 Hz,  $J_{2',1'}$  = 3.9 Hz, 1H, H-2'), 3.37–3.42 (m, 2H, H-2, H-4'), 3.22 (dd,  $J$  = 14.1 Hz,  $J$  = 5.5 Hz, 1H, Asn-CH<sub>2</sub>), 2.99 (dd,  $J$  = 14.1 Hz,  $J$  = 9.7 Hz, 1H, Asn-CH<sub>2</sub>), 2.80 (dd,  $J$  = 12.0 Hz,  $J$  = 1.7 Hz, 1H, Phe-CH<sub>2</sub>), 2.76 (dd,  $J$  = 12.1 Hz,  $J$  = 2.9 Hz, 1H, Phe-CH<sub>2</sub>), 1.40 (d,  $J$  = 7.2 Hz, 3H, Ala-CH<sub>3</sub>).

**<sup>13</sup>C NMR** (151 MHz, D<sub>2</sub>O):  $\delta$  = 176.4, 173.9, 172.2, 171.8 (NHC=O, COOH), 136.6 (C<sub>q,arom</sub>), 129.2, 128.7, 127.1 (Phe-C<sub>arom</sub>), 99.5 (C-1'), 79.1 (C-1), 76.9 (C-3), 76.2, 76.1 (C-5, C-3'/C-4), 72.8, 72.7 (C-5', C-3'/C-4), 71.7 (C-2', C-2), 69.3 (C-4), 60.6 (C-6), 60.4 (C-6'), 55.0 (CHNHAsn), 51.6 (CHNHPh), 49.1 (CHNH<sub>2</sub>), 37.9 (Phe-CH<sub>2</sub>), 36.7 (Asn-CH<sub>2</sub>), 17.1 (Ala-CH<sub>3</sub>).

$[\alpha]_{\text{D}}^{20}$  = + 4.0 (c = 0.25, H<sub>2</sub>O). **Mass Anal.** Calcd for C<sub>28</sub>H<sub>42</sub>N<sub>4</sub>O<sub>15</sub> [M+H]<sup>+</sup>: m/z 675.27194;

HRMS found [M+H]<sup>+</sup>: m/z 675.27076.

***N*<sup>2</sup>-[*N*<sup>2</sup>[*N*<sup>2</sup>Alaninyl]tryptophyl]-*N*-(β-D-glucopyranosyl)-L-asparagine (**11a**)**

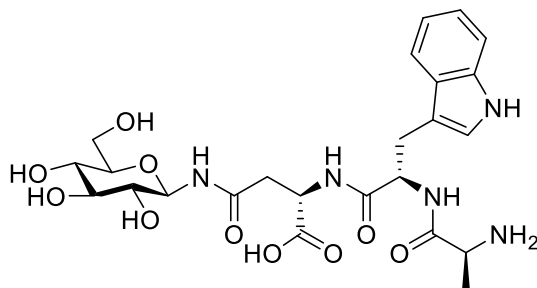

According to General Procedure F, **11a** was obtained from **9a** as a yellow solid. Yield: 92%.

**<sup>1</sup>H NMR** (700 MHz, D<sub>2</sub>O):  $\delta$  = 7.64 (d,  $J$  = 8.0 Hz, 1H, Trp-H<sub>arom</sub>), 7.46 (d,  $J$  = 8.1 Hz, 1H, Trp-H<sub>arom</sub>), 7.23 (s, 1H, Trp-H<sub>arom</sub>), 7.19–7.22, 7.11–7.15 (m, 2H, Trp-H<sub>arom</sub>), 4.88 (d,  $J_{1,2}$  = 9.0 Hz, 1H, H-1), 4.69 (dd,  $J$  = 8.2 Hz,  $J$  = 6.2 Hz, 1H, CHNHTrp), 4.31–4.35 (m, 1H, CHNHAsn), 3.94 (q,  $J$  = 7.1 Hz, 1H, CHNH<sub>2</sub>), 3.84 (dd,  $J_{6b,6a}$  = 12.3 Hz,  $J_{6b,5}$  = 1.7 Hz, 1H, H-6b), 3.67 (dd,  $J_{6a,6b}$  = 12.5 Hz,  $J_{6a,5}$  = 5.6 Hz, 1H, H-6a), 3.46–3.51 (m, 1H, H-3, H-5), 3.33–3.39 (m, 1H, H-2, H-4), 3.31 (dd,  $J$  = 15.1 Hz,  $J$  = 6.0 Hz, 1H, Trp-CH<sub>2</sub>), 3.23 (dd,  $J$  = 14.8 Hz,  $J$  = 8.4 Hz, 1H, Trp-CH<sub>2</sub>), 2.68 (dd,  $J$  = 15.9 Hz,  $J$  = 6.7 Hz, 1H, Asn-CH<sub>2</sub>), 2.54 (dd,  $J$  = 15.9 Hz,  $J$  = 4.7 Hz, 1H, Asn-CH<sub>2</sub>), 1.46 (d,  $J$  = 7.1 Hz, 3H, Ala-CH<sub>3</sub>).

**<sup>13</sup>C NMR** (176 MHz, D<sub>2</sub>O):  $\delta$  = 176.2, 173.8, 172.0, 170.5 (NHC=O, COOH), 136.0, 126.8 (C<sub>q,arom</sub>), 124.4, 121.9, 119.3, 118.3, 112.0 (Trp-C<sub>arom</sub>), 108.9 (C<sub>q,arom</sub>), 79.2 (C-1), 77.5 (C-5), 76.4 (C-3), 71.8, 69.3, 60.6 (C-6), 54.6 (CHNHTrp), 51.3 (CHNHAsn), 48.9 (CHNH<sub>2</sub>), 37.7 (Asn-CH<sub>2</sub>), 26.7 (Trp-CH<sub>2</sub>), 16.5 (Ala-CH<sub>3</sub>).

$[\alpha]_D^{20}$  = – 2.6 ( $c$  = 0.5, H<sub>2</sub>O). **Mass Anal.** Calcd for C<sub>24</sub>H<sub>33</sub>N<sub>5</sub>O<sub>10</sub> [M+H]<sup>+</sup>:  $m/z$  552.23002; HRMS found [M+H]<sup>+</sup>:  $m/z$  552.23000.

***N*<sup>2</sup>-[*N*<sup>2</sup>[*N*<sup>2</sup>Alaninyl]tryptophyl]-*N*-(β-D-galactopyranosyl)-L-asparagine (**11b**)**

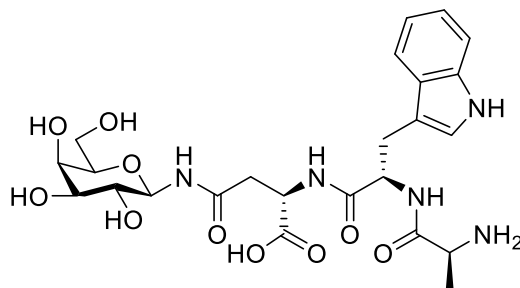

According to General Procedure F, **11b** was obtained from **9b** as a yellow solid. Yield: 99%.

**<sup>1</sup>H NMR** (300 MHz, D<sub>2</sub>O): δ = 7.65 (d, *J* = 7.8 Hz, 1H, Trp-H<sub>arom</sub>), 7.48 (d, *J* = 8.1 Hz, 1H, Trp-H<sub>arom</sub>), 7.24 (s, 1H, Trp-H<sub>arom</sub>), 7.21 (dd, *J* = 8.2 Hz, *J* = 1.0 Hz, 1H, Trp-H<sub>arom</sub>), 7.11–7.17 (m, 1H, Trp-H<sub>arom</sub>), 4.84 (d, *J*<sub>1,2</sub> = 8.7 Hz, 1H, H-1), 4.66–4.73 (m, 1H, CHNHTrp), 4.31–4.37 (m, 1H, CHNHAsn), 3.89–3.99 (m, 2H, H-4, CHNH<sub>2</sub>), 3.64–3.75 (m, 4H, H-3, H-5, H-6a, H-6b), 3.55–3.63 (m, 1H, H-2), 3.33 (dd, *J* = 15.2 Hz, *J* = 6.5 Hz, 1H, Trp-CH<sub>2</sub>), 3.23 (dd, *J* = 15.0 Hz, *J* = 8.3 Hz, 1H, Trp-CH<sub>2</sub>), 2.71 (dd, *J* = 15.9 Hz, *J* = 6.4 Hz, 1H, Asn-CH<sub>2</sub>), 2.55 (dd, *J* = 15.8 Hz, *J* = 4.9 Hz, 1H, Asn-CH<sub>2</sub>), 1.46 (d, *J* = 7.2 Hz, 3H, Ala-CH<sub>3</sub>).

**<sup>13</sup>C NMR** (75 MHz, D<sub>2</sub>O): δ = 176.3, 173.9, 172.0, 170.6 (NHC=O, COOH), 136.1, 128.6, (C<sub>q,arom</sub>), 124.5, 121.9, 119.3, 118.4, 112.0 (Trp-C<sub>arom</sub>), 108.9 (C<sub>q,arom</sub>), 79.6 (C-1), 76.7 (C-5), 73.3 (C-3), 69.4 (C-2), 68.7 (C-4), 61.0 (C-6), 54.7 (CHNHTrp), 52.5, 51.4 (CHNHAsn), 48.9 (CHNH<sub>2</sub>), 37.7 (Asn-CH<sub>2</sub>), 26.7 (Trp-CH<sub>2</sub>), 16.5 (Ala-CH<sub>3</sub>).

[α]<sub>D</sub><sup>20</sup> = − 3.2 (c = 0.1, H<sub>2</sub>O). **Mass Anal.** Calcd for C<sub>24</sub>H<sub>33</sub>N<sub>5</sub>O<sub>10</sub> [M+H]<sup>+</sup>: m/z 552.23002; HRMS found [M+H]<sup>+</sup>: m/z 552.23046.

***N*<sup>2</sup>-[*N*<sup>2</sup>[*N*<sup>2</sup>Alaninyl]tryptophyl]-*N*-(β-*D*-mannopyranosyl)-*L*-asparagine (**11c**)**

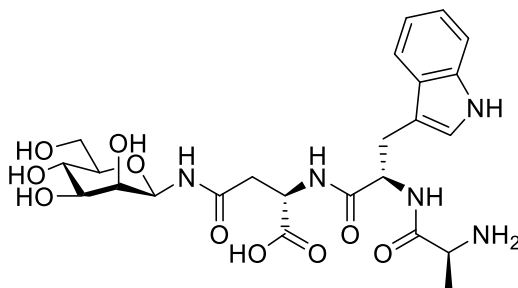

According to General Procedure F, **11c** was obtained from **9c** as a yellow solid. Yield: **77%**.

**<sup>1</sup>H NMR** (400 MHz, D<sub>2</sub>O): δ = 7.63 (d, *J* = 8.0 Hz, 1H, Trp-H<sub>arom</sub>), 7.45 (d, *J* = 8.2 Hz, 1H, Trp-H<sub>arom</sub>), 7.16–7.24 (m, 2H, Trp-H<sub>arom</sub>), 7.08–7.15 (m, 1H, Trp-H<sub>arom</sub>), 5.07 (d, *J*<sub>1,2</sub> = 0.9 Hz, 1H, H-1), 4.68 (dd, *J* = 8.2 Hz, *J* = 6.0 Hz, 1H, CHNHTrp), 4.32 (dd, *J* = 6.2 Hz, *J* = 4.9 Hz, 1H, CHNHAsn), 3.82 (s, 3H, H-2, H-6a CHNH<sub>2</sub>), 3.66 (dd, *J*<sub>6b,6a</sub> = 12.2 Hz, *J*<sub>6b,5</sub> = 6.1 Hz, 1H, H-6b), 3.61 (dd, *J*<sub>3,4</sub> = 9.5 Hz, *J*<sub>3,2</sub> = 3.2 Hz, 1H, H-3), 3.50–3.56 (m, 1H, H-4), 3.39 (ddd, *J*<sub>5,4</sub> = 9.3 Hz, *J*<sub>5,6b</sub> = 6.0 Hz, *J*<sub>5,6a</sub> = 2.1 Hz, 1H, H-5), 3.30 (dd, *J* = 14.8 Hz, *J* = 5.8 Hz, 1H, Trp-CH<sub>2</sub>), 3.21 (dd, *J* = 14.8 Hz, *J* = 8.2 Hz, 1H, Trp-CH<sub>2</sub>), 2.69 (dd, *J* = 15.8 Hz, *J* = 6.6 Hz, 1H, Asn-CH<sub>2</sub>), 2.54 (dd, *J* = 15.8 Hz, *J* = 4.8 Hz, 1H, Asn-CH<sub>2</sub>), 1.40 (d, *J* = 7.1 Hz, 3H, Ala-CH<sub>3</sub>).

**<sup>13</sup>C NMR** (101 MHz, D<sub>2</sub>O): δ = 176.3, 173.1, 172.0, 171.3 (NHC=O, COOH), 136.0, 126.8 (C<sub>q,arom</sub>), 124.4, 121.9, 119.3, 118.3, 111.9 (Trp-C<sub>arom</sub>), 108.9 (C<sub>q,arom</sub>), 77.7 (C-1), 77.6 (C-5), 73.2 (C-3), 70.1 (C-2), 66.4 (C-4), 60.9 (C-6), 54.5 (CHNHTrp), 51.4 (CHNHAsn), 49.0 (CHNH<sub>2</sub>), 37.6 (Asn-CH<sub>2</sub>), 26.7 (Trp-CH<sub>2</sub>), 16.7 (Ala-CH<sub>3</sub>).

[α]<sub>D</sub><sup>20</sup> = – 2.0 (c = 0.5, H<sub>2</sub>O/acetone 1:1). **Mass Anal.** Calcd for C<sub>24</sub>H<sub>33</sub>N<sub>5</sub>O<sub>10</sub> [M+H]<sup>+</sup>: m/z 552.23002; HRMS found [M+H]<sup>+</sup>: m/z 552.23026.

***N*<sup>2</sup>-[*N*<sup>2</sup>Alaninyl]tryptophyl]-*N*-(β-*D*-cellobiosyl)-*L*-asparagine (**11d**)**

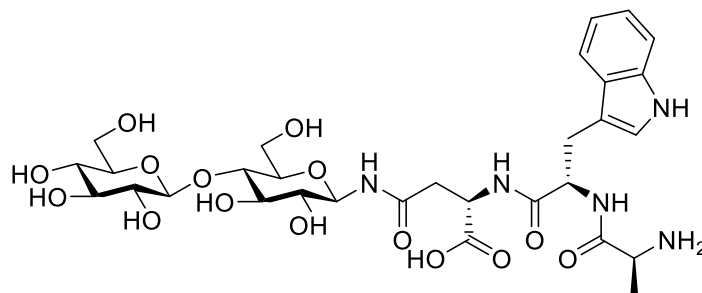

According to General Procedure F, **11d** was obtained from **9d** as a yellow solid. Yield: 49%.

**<sup>1</sup>H NMR** (700 MHz, D<sub>2</sub>O):  $\delta$  = 7.62–7.67, 7.44–7.49 (m, 2H, Trp-H<sub>arom</sub>), 7.23 (s, 1H, Trp-H<sub>arom</sub>), 7.18–7.22, 7.10–7.16 (m, 2H, Trp-H<sub>arom</sub>), 4.90 (d,  $J_{1,2} = 9.3$  Hz, 1H, H-1), 4.69 (dd,  $J = 8.2$  Hz,  $J = 5.8$  Hz, 1H, CHNHTrp), 4.46 (d,  $J_{1',2'} = 8.0$  Hz, 1H, H-1'), 4.31–4.35 (m, 1H, CHNHAsn), 3.93 (q,  $J = 7.0$  Hz, 1H, CHNH<sub>2</sub>), 3.86–3.90 (m, 1H, H-6a, H-6a'), 3.75 (dd,  $J_{6b,6a} = 12.3$  Hz,  $J_{6b',5'} = 4.1$  Hz, 1H, H-6b), 3.69 (dd,  $J_{6b',6a'} = 12.5$  Hz,  $J_{6b',5'} = 6.0$  Hz, 1H, H-6b'), 3.60–3.63 (m, 1H, H-3, H-4, H-5), 3.43–3.46 (m, 1H, H-3', h-%'), 3.36–3.40 (m, 1H, H-2', H-4'), 3.31 (dd,  $J = 15.1$  Hz,  $J = 6.0$  Hz, 1H, Trp-CH<sub>2</sub>), 3.25–3.29 (m, 1H, H-2), 3.23 (dd,  $J = 14.8$  Hz,  $J = 8.4$  Hz, 1H, Trp-CH<sub>2</sub>), 2.68 (dd,  $J = 15.7$  Hz,  $J = 6.7$  Hz, 1H, Asn-CH<sub>2</sub>), 2.57 (dd,  $J = 15.7$  Hz,  $J = 4.7$  Hz, 1H, Asn-CH<sub>2</sub>), 1.45 (d,  $J = 7.3$  Hz, 3H, Ala-CH<sub>3</sub>).

**<sup>13</sup>C NMR** (176 MHz, D<sub>2</sub>O):  $\delta$  = 173.8, 172.0 (NHC=O), 135.9, 126.8 (C<sub>q,arom</sub>), 124.4, 121.9, 119.3, 118.3, 111.8 (Trp-C<sub>arom</sub>), 108.9 (C<sub>q,arom</sub>), 102.5 (C-1'), 79.0 (C-1), 78.1 (C-3), 76.3 (C-5), 76.0 (C-5'), 75.4 (C-3'), 74.9 (C-4), 73.1 (C-2'), 71.6 (C-2), 69.4 (C-4'), 60.5 (C-6'), 59.9 (C-6), 54.6 (CHNHTrp), 51.4 (CHNHAsn), 48.9 (CHNH<sub>2</sub>), 37.7 (Asn-CH<sub>2</sub>), 26.7 (Trp-CH<sub>2</sub>), 16.5 (Ala-CH<sub>3</sub>).

$[\alpha]_{\text{D}}^{20} = -1.2$  (c = 0.1, H<sub>2</sub>O). **Mass Anal.** Calcd for C<sub>30</sub>H<sub>43</sub>N<sub>5</sub>O<sub>15</sub> [M+H]<sup>+</sup>: m/z 714.28284; HRMS found [M+H]<sup>+</sup>: m/z 714.28300.



***N*<sup>2</sup>-[*N*<sup>2</sup>Alaninyl]tryptophyl-*N*-(β-D-lactosyl)-L-asparagine (**11e**)**

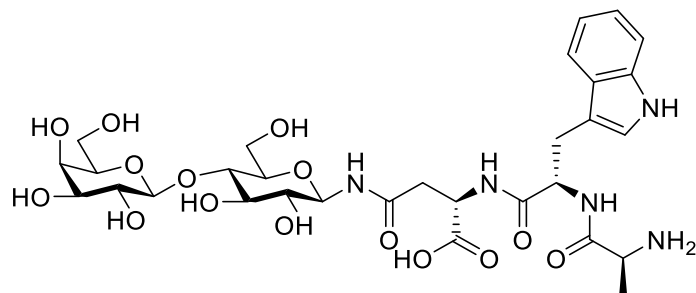

According to General Procedure F, **11e** was obtained from **9e** as a yellow solid. Yield: 99%.

**<sup>1</sup>H NMR** (300 MHz, D<sub>2</sub>O): δ = 7.63–7.70, 7.44–7.51 (m, 2H, Trp-H<sub>arom</sub>), 7.24 (br. s., 1H, Trp-H<sub>arom</sub>), 7.21 (dd, *J* = 8.3 Hz, *J* = 1.1 Hz, 1H, Trp-H<sub>arom</sub>), 7.11–7.18 (m, 1H, Trp-H<sub>arom</sub>), 4.92 (d, *J* = 9.2 Hz, 1H, H-1), 4.67–4.72 (m, 1H, CHNHTrp), 4.39–4.45 (d, *J*<sub>1',2'</sub> = 7.6 Hz, 1H, H-1'), 4.36 (dd, *J* = 6.1 Hz, *J* = 5.0 Hz, 1H, CHNHAsn), 3.82–3.95 (m, 3H, H-4', H-6a, CHNH<sub>2</sub>), 3.69–3.81 (m, 4H, H-4, H-6b, H-6a', H-6b'), 3.58–3.68 (m, 4H, H-5', H-5, H-3', H-3), 3.52 (dd, *J*<sub>2',3'</sub> = 9.9 Hz, *J*<sub>2',1'</sub> = 7.7 Hz, 1H, H-2'), 3.38–3.45 (m, 1H, H-2), 3.33 (dd, *J* = 14.8 Hz, *J* = 5.5 Hz, 1H, Trp-CH<sub>2</sub>), 3.23 (dd, *J* = 14.9 Hz, *J* = 8.4 Hz, 1H, Trp-CH<sub>2</sub>), 2.70 (dd, *J* = 15.7 Hz, *J* = 6.7 Hz, 1H, Asn-CH<sub>2</sub>), 2.59 (dd, *J* = 15.7 Hz, *J* = 5.1 Hz, 1H, Asn-CH<sub>2</sub>), 1.42 (d, *J* = 7.2 Hz, 3H, Ala-CH<sub>3</sub>).

**<sup>13</sup>C NMR** (75 MHz, D<sub>2</sub>O): δ = 173.8, 172.1 (NHC=O, COOH), 136.1, 124.4 (C<sub>q,arom</sub>), 121.9, 119.3, 118.4, 112.0, 109.0 (Trp-C<sub>arom</sub>), 102.9 (C-1'), 79.1 (C-1), 77.9 (C-5), 76.3, 75.3, 75.0, 72.5 (C-5', C-3, C-3', C-4), 71.5 (C-2'), 70.9 (C-2), 68.5 (C-4'), 61.0 (C-6'), 60.0 (C-6), 54.6 (CHNHTrp), 51.4 (CHNHAsn), 49.1 (CHNH<sub>2</sub>), 37.8 (Asn-CH<sub>2</sub>), 26.8 (Trp-CH<sub>2</sub>), 16.9 (Ala-CH<sub>3</sub>).

[α]<sub>D</sub><sup>20</sup> = + 2.3 (c = 0.25, H<sub>2</sub>O). **Mass Anal.** Calcd for C<sub>30</sub>H<sub>43</sub>N<sub>5</sub>O<sub>15</sub> [M+H]<sup>+</sup>: *m/z* 714.28284; HRMS found [M+H]<sup>+</sup>: *m/z* 714.28146.

***N*<sup>2</sup>-[*N*<sup>2</sup>[*N*<sup>2</sup>Alaninyl]tryptophyl]-*N*-(β-*D*-maltosyl)-*L*-asparagine (**11f**)**

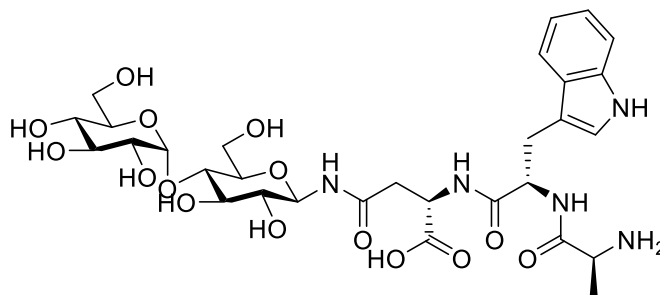

According to General Procedure F, **11f** was obtained from **9f** as a light yellow solid. Yield: 87%.

**<sup>1</sup>H NMR** (400 MHz, D<sub>2</sub>O): δ = 7.60–7.66, 7.43–7.48 (m, 2H, Trp-H<sub>arom</sub>), 7.22 (br. s., 1H, Trp-H<sub>arom</sub>), 7.17–7.21, 7.09–7.15 (m, 2H, Trp-H<sub>arom</sub>), 5.33–5.38 (d, *J*<sub>1',2'</sub> = 7.6 Hz, 1H, H-1'), 4.88 (d, *J*<sub>1,2</sub> = 9.3 Hz, 1H, H-1), 4.68 (dd, *J* = 8.2 Hz, *J* = 6.0 Hz, 1H, CHNHTrp), 4.32 (dd, *J* = 6.1 Hz, *J* = 5.0 Hz, 1H, CHNHAsn), 3.94 (q, *J* = 7.1 Hz, 1H, CHNH<sub>2</sub>), 3.73–3.86 (m, 3H, H-6a, H-6b, H-3), 3.58–3.73 (m, 6H, H-5, H-5', H-4, H-3', H-6a', H-6b'), 3.52 (dd, *J*<sub>2',3'</sub> = 9.9 Hz, *J*<sub>2',1'</sub> = 3.9 Hz, 1H, H-2'), 3.33–3.39 (m, 2H, H-2, H-4'), 3.30 (dd, *J* = 14.8 Hz, *J* = 5.9 Hz, 1H, Trp-CH<sub>2</sub>), 3.22 (dd, *J* = 14.9 Hz, *J* = 8.3 Hz, 1H, Trp-CH<sub>2</sub>), 2.67 (dd, *J* = 15.8 Hz, *J* = 6.7 Hz, 1H, Asn-CH<sub>2</sub>), 1.45 (d, *J* = 7.2 Hz, 3H, Ala-CH<sub>3</sub>).

**<sup>13</sup>C NMR** (101 MHz, D<sub>2</sub>O): δ = 173.8, 172.0, 170.5 (NHC=O, COOH), 136.0, 126.8 (C<sub>q,arom</sub>), 124.4, 121.9, 119.3, 118.3, 112.0 (Trp-C<sub>arom</sub>), 108.9 (C<sub>q,arom</sub>), 99.5 (C-1'), 79.0 (C-1), 76.8 (C-3), 76.2, 76.1 (C-5, C-3'/C-4), 72.8, 72.6 (C-5', C-3'/C-4), 71.6 (C-2, C-2'), 69.2 (C-4'), 60.6 (C-6), 60.4 (C-6'), 54.6 (CHNHAsn), 51.2 (CHNHTrp), 48.9 (CHNH<sub>2</sub>), 37.7 (Asn-CH<sub>2</sub>), 26.7 (Trp-CH<sub>2</sub>), 16.4 (Ala-CH<sub>3</sub>).

[α]<sub>D</sub><sup>20</sup> = + 3.5 (c = 0.1, H<sub>2</sub>O). **Mass Anal.** Calcd for C<sub>30</sub>H<sub>43</sub>N<sub>5</sub>O<sub>15</sub> [M+H]<sup>+</sup>: m/z 714.28284; HRMS found [M+H]<sup>+</sup>: m/z 714.28206.

## References

1. Esteves, A. P.; Rodrigues, L. M.; Silva, M. E.; Gupta, S.; Oliveira-Campos, A. M. F.; Machalicky, O.; Mendonça, A. J. *Tetrahedron* **2005**, *61*, 8625-8632.
2. Sirion, U.; Kim, H. J.; Lee, J. H.; Seo, J. W.; Lee, B. S.; Lee, S. J.; Oh, S. J.; Chi, D. Y. *Tetrahedron Lett.* **2007**, *48*, 3953-3957.
3. Salunke, S. B.; Babu, N. S.; Chen, C. T. *Chem. Commun. (Cambridge, U. K.)* **2011**, *47*, 10440-10442.
4. Berthold, H. J.; Franke, S.; Thiem, J.; Schotten, T. *J. Org. Chem.* **2010**, *75*, 3859-3862.
5. Porwanski, S.; Marsura, A. *Eur. J. Org. Chem.* **2009**, *2009*, 2047-2050.
6. Pető, C.; Batta, G.; Györgydeák, Z.; Sztaricskai, F. *Liebigs Ann. Chem.* **1991**, *1991*, 505-507.
7. Varamini, P.; Mansfeld, F. M.; Blanchfield, J. T.; Wyse, B. D.; Smith, M. T.; Toth, I. J. *Med. Chem.* **2012**, *55*, 5859-5867.
8. Park, J.; Rader, L. H.; Thomas, G. B.; Danoff, E. J.; English, D. S.; DeShong, P. *Soft Matter* **2008**, *4*.
9. Maier, M. A.; Yannopoulos, C. G.; Mohamed, N.; Roland, A.; Fritz, H.; Mohan, V.; Just, G.; Manoharan, M. *Bioconjugate Chem.* **2003**, *14*, 18-29.
10. Zheng, X.; Morgan, J.; Pandey, S. K.; Chen, Y.; Tracy, E.; Baumann, H.; Missert, J. R.; Batt, C.; Jackson, J.; Bellnier, D. A.; Henderson, B. W.; Pandey, R. K. *J. Med. Chem.* **2009**, *52*, 4306-4318.
11. Choudhury, A. K.; Kitaoka, M.; Hayashi, K. *Eur. J. Org. Chem.* **2003**, *2003*, 2462-2470.
12. Sansone, F.; Chierici, E.; Casnati, A.; Ungaro, R. *Org. Biomol. Chem.* **2003**, *1*, 1802-1809.

13. van Ameijde, J.; Albada, H. B.; Liskamp, R. M. J. *J. Chem. Soc., Perkin Trans. 1* **2002**, 1042-1049.
14. Moyle, P. M.; Olive, C.; Ho, M. F.; Pandey, M.; Dyer, J.; Suhrbier, A.; Fujita, Y.; Toth, I. *J. Med. Chem.* **2007**, *50*, 4721-4727.
15. Györgydeák, Z.; Paulsen, H. *Justus Liebigs Annalen der Chemie* **1977**, 1977, 1987-1991.
